# Supplementary material for: Postural control of arm and fingers through integration of movement commands
Source: eLife. 2020 Feb 11;9:e52507. doi: 10.7554/eLife.52507 (PMC7062460; doi:10.7554/eLife.52507)
Supplement: Figure 1—source data 1. — The ‘readme’ tab describes all quantities reported in the ‘data’ tab. [file elife-52507-fig1-data1.xlsx]

## Sheet: readme
Lead author	Scott	Albert
Title	Postural control of arm and fingers through integration of movement commands
Publication year	2020
Journal	eLife
Description	These data are reported in Figure 1 of the manuscript.
Column description	Monkey label	0 refers to Monkey A
		1 refers to Monkey B
	Reach direction	This is the orientation of the target relative to the start position in the vertical plane. 0 degrees means horizontal movement to the right. 90 degrees is vertical movement straight upwards.
	Muscle number	These number refer to a particular muscle
		1 is posterior deltoid site 1 (monkey A)	11 is pectoralis site 1 (monkey B)
		2 is medial bicep site 1 (monkey A)	12 is medial bicep site 2 (monkey B)
		3 is medial deltoid site 3 (monkey A)	13 is brachialis site 1 (monkey B)
		4 is medial deltoid site 2 (monkey A)	14 is posterior deltoid site 1 (monkey B)
		5 is trapezius site 1 (monkey A)	15 is medial deltoid site 2 (monkey B)
		6 is lateral bicep site 1 (monkey A)	16 is outer bicep site 1 (monkey B)
		7 is upper trapezius site 1 (monkey A)	17 is anterior deltoid site 2 (monkey B)
		8 is medial deltoid site 1 (monkey A)	18 is anterior deltoid site 1 (monkey B)
		9 is anterior deltoid site 1 (monkey A)	19 is medial deltoid site 1 (monkey B)
		10 is lower trapezius site 1 (monkey B)	20 is upper trapezius site 1 (monkey B)
	Hold 2 - Hold 1 (out)	This is the difference in normalized EMG activity for the reach starting at center, moving outwards to the target (hold 2 - hold 1)
	Hold 2 - Hold 1 (back)	This is the difference in normalized EMG activity for the reach starting at the outer target, moving back to the center (hold 2 - hold 1)
	EMG Integral (out)	This is the integral of normalized EMG activity during movement, relative to hold 1 activity, for the reach starting at center, moving outwards to the target
	EMG Integral (back)	This is the integral of normalized EMG activity during movement, relative to hold 1 activity, for the reach starting at the outer target, moving back to the center
	Duration (out)	This is the duration of the movement, for the reach starting at center, moving outwards to the target (in milliseconds)
	Duration (back)	This is the duration of the movement, for the reach starting at the outer target, moving back to the center (in milliseconds)
Notes	Entries with NaN values represent movements with durations greater than 850 ms.
	For these movements, it was not possible to reliably measure the hold 2 activity of the muscle, prior to the start of the next movement

## Sheet: data
Monkey label	Reach direction	Muscle number	Hold 2 - Hold 1 (out)	Hold 2 - Hold 1 (back)	EMG Integral (out)	EMG Integral (back)	Duration (out)	Duration (back)
0	-36	1	-0.0443761	0.0470804	-0.0240786	0.0228815	292	548
0	0	1	-0.0284247	0.0644458	0.0300304	0.0541532	294	810
0	36	1	-0.133132	0.14396	0.0530212	0.115138	311	630
0	72	1	-0.12017	0.134968	0.067848	0.114929	322	670
0	108	1	0.0816169	0.00910596	0.114552	0.0112918	323	697
0	144	1	0.199725	-0.143184	0.149915	-0.107431	327	708
0	180	1	0.270374	-0.199913	0.168967	-0.152223	330	796
0	216	1	0.291078	-0.241761	0.151088	-0.1695	323	726
0	-36	2	0.474123	-0.462335	0.112468	-0.122837	268	477
0	0	2	0.310867	-0.384802	0.111931	-0.0757762	291	501
0	36	2	0.00574559	-0.0118506	0.104232	0.0987763	318	571
0	72	2	0.00775995	0.0388708	0.105994	0.0912942	319	733
0	108	2	0.0045019	-0.00475291	0.105515	0.101233	331	684
0	144	2	0.00670155	-0.00518112	0.0892781	0.133863	336	748
0	180	2	0.00132533	-0.000500943	0.072354	0.199894	348	817
0	216	2	-0.00235172	-0.00426233	0.049372	0.248444	338	704
0	-36	3	-0.283923	0.432253	-0.0970119	0.18842	307	455
0	0	3	-0.0951992	0.233814	0.0148378	0.134803	313	438
0	36	3	-0.281949	0.330904	0.0394702	0.231942	315	461
0	72	3	-0.0773079	0.128987	0.0932018	0.127147	337	450
0	108	3	0.106896	-0.343172	0.100058	-0.155395	340	494
0	144	3	0.196065	-0.313182	0.136867	-0.262815	350	674
0	180	3	0.223012	NaN	0.123795	NaN	297	924
0	216	3	0.395656	-0.191785	0.18621	-0.197043	286	772
0	-36	4	-0.34807	0.535482	-0.136346	0.226419	299	548
0	0	4	-0.0614674	NaN	-0.0536786	NaN	303	868
0	36	4	-0.287249	0.354374	-0.0185199	0.194154	309	587
0	72	4	-0.194902	0.188148	0.00764116	0.0736151	314	576
0	108	4	0.229332	-0.353608	0.129439	-0.273318	338	729
0	144	4	0.282553	NaN	0.148125	NaN	310	951
0	180	4	0.204578	NaN	0.138182	NaN	300	1039
0	216	4	0.296922	NaN	0.157847	NaN	290	936
0	-36	5	0.0958896	-0.0679886	0.0823243	0.0256769	290	457
0	0	5	0.267017	-0.250245	0.116737	-0.0105697	298	586
0	36	5	0.143199	-0.102184	0.0963887	0.144013	306	507
0	72	5	0.0790359	-0.0638517	0.0547405	0.136607	322	511
0	108	5	0.0578007	-0.0677032	0.0930746	0.0463869	356	563
0	144	5	0.0338889	-0.00311569	0.163901	0.0499251	312	778
0	180	5	-0.0149742	NaN	0.155283	NaN	294	882
0	216	5	-0.03102	0.0289565	0.148151	0.0506328	294	799
0	-36	6	0.0630755	-0.0970665	0.0580131	0.0417836	287	469
0	0	6	0.0516688	-0.0662637	0.072874	0.0547081	286	483
0	36	6	0.0029397	-0.0111106	0.0871779	0.0568282	310	420
0	72	6	-0.00047803	0.00696372	0.101623	0.055437	352	466
0	108	6	0.0027109	-0.00127454	0.0936242	0.0339638	356	541
0	144	6	-0.00119575	0.00221508	0.0743653	0.0460373	302	687
0	180	6	0.00107012	-0.0187203	0.0567696	0.0388719	291	721
0	216	6	0.00746941	-0.0529625	0.026259	0.0310161	289	561
0	-36	7	0.151682	-0.102816	-0.0316614	0.0894351	286	466
0	0	7	0.319604	-0.236237	0.0154075	0.0300089	293	464
0	36	7	-0.00210334	0.036659	0.0605472	0.179896	307	520
0	72	7	-0.156266	0.13587	0.0843712	0.22885	358	487
0	108	7	-0.0472178	0.0241327	0.120289	0.149986	357	474
0	144	7	0.086678	-0.157491	0.181474	0.00218566	295	484
0	180	7	0.190184	-0.251503	0.197344	-0.0648703	286	733
0	216	7	0.305334	-0.343921	0.153642	-0.0669765	283	496
0	-36	8	-0.148801	0.133538	-0.0387353	0.119494	287	539
0	0	8	-0.253797	0.198062	-0.0164384	0.183491	305	373
0	36	8	-0.241686	0.219383	0.0609716	0.194364	289	358
0	72	8	-0.0849543	0.00587475	0.119416	0.092222	309	428
0	108	8	0.246272	-0.331234	0.154633	-0.0567857	296	499
0	144	8	0.380916	-0.50461	0.156316	-0.215109	288	627
0	180	8	0.465496	-0.494731	0.147373	-0.254252	279	619
0	216	8	0.488834	-0.447833	0.15282	-0.241426	282	596
0	-36	9	-0.0733328	0.139461	0.00842678	0.0925773	292	501
0	0	9	-0.0400992	0.0658227	0.032839	0.0753587	278	471
0	36	9	-0.123292	0.101415	0.020473	0.0999054	291	436
0	72	9	0.0460527	-0.0353814	0.0412319	0.0220267	301	451
0	108	9	0.00539487	0.00477679	0.0709349	0.00806619	330	513
0	144	9	-0.0314997	0.0414428	0.0873138	0.0164883	326	677
0	180	9	-0.0564055	0.0707152	0.105012	0.0329362	280	637
0	216	9	0.0351933	0.088441	0.17568	0.0351618	309	753
1	-36	10	0.00646517	0.0220944	0.134633	0.122335	305	394
1	0	10	-0.0299142	0.0905008	0.158853	0.122299	351	351
1	36	10	-0.0561675	0.0582945	0.157092	0.113193	377	410
1	72	10	-0.044231	0.0760635	0.119133	0.14483	366	409
1	108	10	-0.0253752	0.0192408	0.0521446	0.148975	332	420
1	144	10	-0.011843	0.0353983	0.029496	0.17152	312	433
1	180	10	-0.00695859	0.031807	0.0260429	0.170272	296	458
1	216	10	-0.00126658	0.0231071	0.0114083	0.158014	300	491
1	-36	11	-0.0112706	0.0196294	0.0188483	0.0311502	314	407
1	0	11	-0.023796	0.018313	0.00746749	0.0149077	368	365
1	36	11	-0.0390995	0.0370631	0.0106051	0.0182891	365	377
1	72	11	-0.0467616	0.0569758	0.0189233	0.0366816	359	396
1	108	11	-0.0491994	0.0571935	0.053093	0.065949	326	414
1	144	11	-0.0291864	0.029313	0.0965065	0.0805968	316	446
1	180	11	0.0251819	-0.0256751	0.120157	0.0518381	284	492
1	216	11	0.067662	-0.0633495	0.0723729	0.0128297	312	499
1	-36	12	0.529564	-0.522538	0.162446	-0.113709	324	408
1	0	12	0.208413	-0.175775	0.170189	0.0203508	374	354
1	36	12	-0.00421854	0.0469301	0.169545	0.123773	387	349
1	72	12	-0.0475308	0.072611	0.172521	0.161131	369	356
1	108	12	-0.0675186	0.0921509	0.128003	0.170685	340	369
1	144	12	-0.0492214	0.0777528	0.0981857	0.175133	312	455
1	180	12	-0.0223219	0.0634307	0.0858824	0.203859	292	486
1	216	12	-0.0133159	0.0533525	0.0575473	0.235137	304	514
1	-36	13	0.000124957	0.0104896	0.0042142	0.0726059	318	389
1	0	13	0.000922762	-0.000146947	0.0222248	0.0782512	346	349
1	36	13	0.000562658	0.00773567	0.0627602	0.0839774	384	338
1	72	13	6.1718e-05	0.0187132	0.0814941	0.0760043	355	371
1	108	13	0.00213996	0.019483	0.0933312	0.0927348	322	377
1	144	13	0.00197626	-0.00166757	0.0757853	0.0959245	305	414
1	180	13	0.00152328	-0.000491264	0.0530746	0.0808962	280	450
1	216	13	0.00246131	-0.00111724	0.0355185	0.083749	293	462
1	-36	14	0.0320761	0.000206239	0.126643	0.0488927	320	393
1	0	14	0.00386821	0.0471485	0.162575	0.0996514	350	353
1	36	14	-0.0347897	0.0480328	0.136351	0.0834089	386	361
1	72	14	-0.0400786	0.0797238	0.108853	0.0687247	360	372
1	108	14	0.0779881	-0.00398414	0.0941184	0.0340977	319	385
1	144	14	0.0482153	-0.018284	0.0940219	0.0358963	311	424
1	180	14	0.0364166	-0.00561174	0.115815	0.0423709	286	458
1	216	14	0.0600363	-0.0175578	0.140123	0.0416743	293	483
1	-36	15	-0.033907	0.0815212	0.023521	0.135079	306	363
1	0	15	-0.0446188	0.0914483	0.0651924	0.148484	327	342
1	36	15	-0.0570112	0.0743715	0.0798816	0.131249	345	334
1	72	15	-0.0142839	0.0388327	0.0545241	0.1004	316	365
1	108	15	0.206853	-0.166297	0.080465	-0.0148333	292	373
1	144	15	0.304685	-0.274213	0.126663	-0.070063	290	367
1	180	15	0.239716	-0.235326	0.148174	-0.05812	291	392
1	216	15	0.192835	-0.150887	0.151992	0.0119018	285	408
1	-36	16	0.288794	-0.296479	0.135346	-0.0221366	344	376
1	0	16	0.211955	-0.194748	0.126439	-0.0248324	347	336
1	36	16	0.0788458	-0.0230496	0.137134	0.0104543	374	346
1	72	16	-0.0273174	0.101057	0.156588	0.0914171	360	372
1	108	16	-0.0685335	0.10964	0.11893	0.104587	326	370
1	144	16	-0.0632426	0.10485	0.0906669	0.110526	323	413
1	180	16	-0.0626833	0.100608	0.0620259	0.117864	315	457
1	216	16	-0.0236814	0.0482541	0.0364698	0.111362	319	471
1	-36	17	-0.0172475	0.0271075	0.00475323	0.0797063	322	393
1	0	17	0.0180309	0.0313289	0.0530031	0.0755785	347	358
1	36	17	0.0455763	0.00965919	0.105784	0.058217	378	345
1	72	17	0.0808806	-0.03589	0.144569	0.0460486	344	352
1	108	17	0.191625	-0.168703	0.191757	-0.0141009	333	359
1	144	17	0.44184	-0.433562	0.20622	-0.121323	328	359
1	180	17	0.403804	-0.452127	0.202091	-0.130095	335	386
1	216	17	0.237806	-0.271215	0.161756	-0.0655633	314	401
1	-36	18	0.14186	-0.121547	0.0213461	0.0384241	320	445
1	0	18	0.12063	-0.0807599	0.0949191	0.0680273	331	392
1	36	18	0.000711409	0.0418109	0.169181	0.0979688	347	404
1	72	18	-0.00500484	0.0124733	0.201207	0.103331	322	446
1	108	18	0.140163	-0.138912	0.225822	-0.00849862	329	484
1	144	18	0.199213	-0.265736	0.243326	-0.0836736	330	502
1	180	18	0.305921	-0.313438	0.243946	-0.154999	346	561
1	216	18	0.389612	-0.343686	0.213994	-0.167999	338	577
1	-36	19	0.0821062	-0.0328831	0.056002	0.0672725	368	442
1	0	19	0.0577212	-0.0362485	0.101685	0.0955307	373	376
1	36	19	0.0101809	-0.00719327	0.120164	0.114499	360	376
1	72	19	-0.0127677	0.0127073	0.116946	0.0961574	388	423
1	108	19	0.0320085	-0.0501114	0.102066	0.0504638	338	431
1	144	19	0.109181	-0.0808295	0.139911	0.0205528	329	469
1	180	19	0.119864	-0.1275	0.204759	-0.00219499	369	550
1	216	19	0.185332	-0.121045	0.24537	0.0164244	346	530
1	-36	20	0.170445	-0.113667	0.131208	0.0987653	394	427
1	0	20	0.133172	-0.0484619	0.20024	0.148583	395	378
1	36	20	0.017038	0.0113352	0.226047	0.175204	393	400
1	72	20	-0.0294767	0.0281545	0.190696	0.156688	337	450
1	108	20	-0.0289019	0.0298596	0.16625	0.104389	317	444
1	144	20	0.0217574	0.000416	0.228539	0.0899574	317	494
1	180	20	0.144431	-0.0623238	0.314034	0.0336491	361	544
1	216	20	0.266598	-0.129507	0.31115	0.0183585	351	547
