# Supplementary material for: Postural control of arm and fingers through integration of movement commands
Source: eLife. 2020 Feb 11;9:e52507. doi: 10.7554/eLife.52507 (PMC7062460; doi:10.7554/eLife.52507)
Supplement: Figure 2—source data 1. — The data provide trial-by-trial measures of each quantity. In addition, the position of the finger during hold 1 and hold 2 are provided for all trials in each session. The ‘readme’ tab describes all quantities reported in the ‘data’ tab. [file elife-52507-fig2-data1.xlsx]

## Sheet: readme
Lead author	Scott	Albert
Title	Postural control of arm and fingers through integration of movement commands
Publication year	2020
Journal	eLife
Description	These data are reported in Figure 2 of the manuscript.
Column description	Monkey label	0 refers to Monkey R
		1 refers to Monkey D
	Session number	The experiment session on which data were recorded
	Trial number	Each individual trial in the session
	Muscle number	These number refer to a particular muscle
		1 is 1DI
		2 is AbPL
		3 is EDC
		4 is ECR
		5 is ECU
		6 is FDS
		7 is FDP
		8 is FCR
		9 is FCU
	Hold 1 (lever)	This is the position of the lever in degrees during hold 1
	Hold 2 (lever)	This is the position of the lever in degrees during hold 2
	Hold 1 (EMG)	This is the normalized EMG activity of the muscle during hold 1
	Hold 2 (EMG)	This is the normalized EMG activity of the muscle during hold 2
	Hold 2 - Hold 1 (EMG)	This is the difference in normalized EMG activity (hold 2 - hold 1)
	EMG Integral	This is the integral of normalized EMG activity during movement, relative to hold 1 activity

## Sheet: data
Monkey label	Session number	Trial number	Muscle number	Hold 1 (lever)	Hold 2 (lever)	Hold 1 (EMG)	Hold 2 (EMG)	Hold 2 - Hold 1 (EMG)	EMG Integral
0	1	1	9	12.0125	24.5884	-0.178682	-0.0044653	0.174217	0.301229
0	1	2	9	13.5075	24.4315	-0.224161	-0.0199801	0.204181	0.326129
0	1	3	9	12.9754	25.052	0.0266465	0.12698	0.100333	0.166386
0	1	4	9	13.3783	24.9694	-0.178839	0.0679806	0.24682	0.321997
0	1	5	9	12.2806	24.7658	-0.122663	0.110448	0.233111	0.299976
0	1	6	9	13.4092	24.8463	-0.129184	0.0768665	0.20605	0.2502
0	1	7	9	12.1571	24.2233	0.0962569	0.157299	0.0610421	0.270722
0	1	8	9	13.8845	25.7728	0.0944088	0.348488	0.254079	0.318657
0	1	9	9	12.8519	24.1595	-0.21034	0.0474422	0.257782	0.390758
0	1	10	9	13.9383	24.4372	-0.100529	0.087081	0.18761	0.292527
0	1	11	9	12.9357	23.8792	-0.0849415	0.134748	0.21969	0.269394
0	1	12	9	12.3132	25.5094	-0.0313705	0.259549	0.290919	0.302856
0	1	13	9	13.4213	24.9239	-0.0696046	0.224223	0.293827	0.285643
0	1	14	9	12.9206	25.3586	-0.0411286	0.183632	0.22476	0.394168
0	1	15	9	11.6163	24.3626	0.0846208	0.333989	0.249368	0.367768
0	1	16	9	14.0182	25.3703	-0.0413083	0.238317	0.279625	0.350114
0	1	17	9	13.7298	25.3325	-0.00760053	0.223903	0.231503	0.213797
0	1	18	9	13.5573	24.8772	-0.0674568	0.207396	0.274852	0.249721
0	1	19	9	12.7406	25.2181	-0.0762336	0.0773113	0.153545	0.249993
0	1	20	9	12.2659	25.3201	0.107537	0.256796	0.149259	0.27827
0	1	21	9	13.1691	24.7024	0.0148001	0.199288	0.184488	0.285017
0	1	22	9	13.5392	25.0607	0.287832	0.385339	0.0975065	0.280277
0	1	23	9	13.4932	25.18	0.0694522	0.201738	0.132286	0.173328
0	1	24	9	13.4561	26.0245	0.0107403	0.289211	0.278471	0.317169
0	1	25	9	11.8716	24.6942	-0.0390532	0.082392	0.121445	0.34484
0	1	26	9	13.4278	24.5367	0.00662649	0.127217	0.12059	0.293247
0	1	27	9	13.47	25.1462	-0.00918086	0.327872	0.337053	0.429501
0	1	28	9	13.9132	23.8184	-0.0231647	0.186968	0.210133	0.302146
0	1	29	9	13.6646	25.2962	0.169522	0.208361	0.0388387	0.155163
0	1	30	9	12.0838	24.4053	-0.0279882	0.271079	0.299067	0.338037
0	1	31	9	12.6812	24.5984	0.0787563	0.241467	0.162711	0.10355
0	1	32	9	13.912	24.4905	0.0625738	0.144663	0.0820895	0.206018
0	1	33	9	12.8104	25.2735	0.306354	0.279462	-0.0268919	0.106408
0	1	34	9	13.8381	24.7171	0.0479449	0.258041	0.210096	0.234556
0	1	35	9	13.3499	24.4075	0.0551051	0.397599	0.342494	0.403481
0	1	36	9	12.7459	25.3319	0.14229	0.287698	0.145408	0.185063
0	1	37	9	13.3194	25.4211	-0.0481994	0.354325	0.402525	0.382021
0	1	38	9	12.8051	25.5833	0.164569	0.310911	0.146342	0.347916
0	1	39	9	13.5444	24.6303	-0.106511	0.201313	0.307825	0.479764
0	1	40	9	13.4971	24.4699	0.0454916	0.267416	0.221925	0.602983
0	1	41	9	13.0089	24.6104	-0.00118862	0.45117	0.452358	0.554474
0	1	42	9	13.2677	25.0429	0.0856954	0.282072	0.196376	0.421811
0	1	43	9	11.8637	24.887	0.077183	0.270015	0.192832	0.242013
0	1	44	9	11.9618	25.115	0.116783	0.420625	0.303842	0.414343
0	1	45	9	12.1911	24.9264	0.110293	0.141011	0.0307175	0.0920787
0	1	46	9	13.3537	24.6085	-0.0936312	0.185821	0.279452	0.374356
0	1	47	9	13.1744	24.6059	0.046362	0.370392	0.32403	0.348981
0	1	48	9	12.5149	24.4607	0.451402	0.349681	-0.101721	0.0255044
0	1	49	9	12.819	24.5441	-0.033135	0.253818	0.286953	0.364797
0	1	50	9	12.6892	25.5208	0.147148	0.267428	0.12028	0.380416
0	1	51	9	13.3969	26.2407	-0.198871	0.233283	0.432154	0.61208
0	1	52	9	14.1463	24.7624	0.0206676	0.116344	0.0956763	0.131096
0	1	53	9	13.7222	24.6233	-0.205802	-0.026836	0.178966	0.336797
0	1	54	9	13.8565	24.9733	-0.13153	0.099206	0.230736	0.371909
0	1	55	9	13.3752	24.0103	0.108808	0.351118	0.242311	0.261466
0	1	56	9	13.0874	24.2706	0.0489647	0.258901	0.209937	0.157235
0	1	57	9	12.3653	23.9797	0.108223	0.189575	0.0813524	0.237203
0	1	58	9	12.1898	24.3012	-0.0761457	0.146042	0.222188	0.363374
0	1	59	9	13.4129	24.6761	0.0179902	0.110088	0.0920975	0.375129
0	1	60	9	13.1114	24.7335	-0.0531527	0.215837	0.26899	0.361115
0	1	61	9	14.2159	24.7955	-0.068571	0.16911	0.237681	0.270523
0	1	62	9	12.881	25.684	-0.0442495	0.162126	0.206376	0.312712
0	1	63	9	13.603	24.5696	-0.0188159	0.01267	0.0314859	0.326135
0	1	64	9	13.6831	25.5009	0.0157178	0.148333	0.132615	0.194687
0	1	65	9	13.5177	26.2693	0.0143684	0.291981	0.277613	0.368805
0	1	66	9	13.1708	23.962	-0.0447315	0.204177	0.248908	0.294522
0	1	67	9	13.7835	24.9691	0.0652924	0.362842	0.297549	0.385093
0	1	68	9	13.4638	24.4706	-0.0607239	0.139498	0.200222	0.400449
0	1	69	9	13.0267	24.7757	-0.128005	0.135638	0.263643	0.39342
0	1	70	9	12.0521	24.7934	-0.0294003	0.228073	0.257474	0.227066
0	1	71	9	13.0284	25.1955	0.0993798	0.103948	0.00456852	0.0691522
0	1	72	9	12.7494	24.4255	0.0619646	0.207262	0.145297	0.325399
0	1	73	9	13.8749	24.8144	-0.00878651	0.137442	0.146229	0.314385
0	1	74	9	12.1804	23.9984	-0.212438	-0.0064128	0.206025	0.354953
0	1	75	9	13.294	25.4701	-0.147349	0.084188	0.231537	0.247556
0	1	76	9	13.5512	23.5796	-0.00803648	0.417028	0.425064	0.461953
0	1	77	9	14.0196	24.5299	-0.299704	-0.0131624	0.286541	0.389945
0	1	78	9	12.2584	26.1049	0.0836894	-0.0476825	-0.131372	0.137822
0	1	79	9	11.6605	25.2846	0.130947	-0.0684919	-0.199439	0.154328
0	2	80	9	11.9347	23.3643	0.0883571	0.249427	0.16107	0.549825
0	2	81	9	12.8234	23.5972	0.122622	0.149351	0.026729	0.313177
0	2	82	9	13.7487	24.431	0.0259063	0.262216	0.23631	0.478772
0	2	83	9	12.9462	23.1816	0.0913309	0.281597	0.190266	0.455129
0	2	84	9	13.3872	23.3395	-0.000271907	0.194375	0.194647	0.407646
0	2	85	9	12.5194	23.9439	0.0891632	0.193025	0.103862	0.524782
0	2	86	9	13.1182	23.7201	-0.0284232	0.20055	0.228973	0.535847
0	2	87	9	12.5804	23.3774	0.0271767	0.231599	0.204423	0.603701
0	2	88	9	11.7471	23.1009	-0.150787	0.100892	0.251678	0.527896
0	2	89	9	13.4487	23.5195	-0.127647	0.0525352	0.180182	0.436743
0	2	90	9	12.6457	23.9321	0.00468434	0.349741	0.345057	0.542379
0	2	91	9	13.0197	24.3527	-0.0533661	0.284757	0.338123	0.585289
0	2	92	9	12.1712	23.5799	0.02744	0.119101	0.0916613	0.355389
0	2	93	9	13.2352	23.7659	0.0282873	0.217234	0.188947	0.392173
0	2	94	9	12.9667	23.4106	0.0320622	0.138494	0.106432	0.402621
0	2	95	9	13.1697	23.762	-0.0572221	0.0380937	0.0953158	0.370144
0	2	96	9	13.5811	23.2081	0.268569	0.17038	-0.0981887	0.316384
0	2	97	9	11.7532	24.0766	-0.159572	0.0207383	0.18031	0.422895
0	2	98	9	12.736	23.5106	-0.0124268	0.1458	0.158227	0.401909
0	2	99	9	12.5148	23.3747	-0.0848143	0.221529	0.306344	0.512067
0	2	100	9	13.5365	23.7415	-0.106878	0.14372	0.250598	0.479299
0	2	101	9	12.393	24.0502	0.081988	0.113136	0.0311484	0.422782
0	2	102	9	12.6645	24.4233	0.203982	0.273605	0.0696235	0.389187
0	2	103	9	13.4125	23.9618	-0.00547057	0.141463	0.146934	0.409868
0	2	104	9	12.572	23.4369	-0.107632	0.131457	0.239089	0.547812
0	2	105	9	13.3197	23.5283	0.146083	0.361743	0.21566	0.473426
0	2	106	9	11.2564	23.3249	-0.014814	0.247635	0.262449	0.545533
0	2	107	9	13.4295	23.9262	-0.0211563	0.0949714	0.116128	0.461283
0	2	108	9	12.8166	23.6704	-0.0503976	0.227543	0.27794	0.571514
0	2	109	9	11.8409	23.0937	0.000121935	0.154072	0.15395	0.541137
0	2	110	9	12.7907	24.6899	-0.0859804	0.21545	0.30143	0.537176
0	2	111	9	12.7245	24.0227	-0.102638	0.107478	0.210116	0.519104
0	2	112	9	12.446	23.2294	-0.0682787	0.108874	0.177153	0.438044
0	3	113	9	12.1409	23.6356	-0.0422397	0.131902	0.174142	0.257121
0	3	114	9	12.4975	23.5572	-0.0142199	0.18884	0.20306	0.390694
0	3	115	9	12.6309	23.367	-0.00944118	0.148158	0.157599	0.327063
0	3	116	9	13.1838	23.4522	-0.03731	0.257267	0.294577	0.376891
0	3	117	9	12.4335	23.802	-0.0479416	0.182202	0.230144	0.387796
0	3	118	9	12.0153	23.4515	-0.107522	0.161453	0.268975	0.56177
0	3	119	9	12.4282	23.3119	0.00359134	0.18714	0.183549	0.462982
0	3	120	9	13.1946	23.4696	-0.0522306	0.236388	0.288619	0.54382
0	3	121	9	12.9986	23.0791	-0.0319226	0.150261	0.182184	0.371163
0	3	122	9	12.5598	23.6923	-0.116697	0.0805733	0.197271	0.456494
0	3	123	9	12.8592	23.5535	-0.131259	0.237607	0.368865	0.549399
0	3	124	9	13.0378	23.4077	0.0501512	0.234634	0.184483	0.380397
0	3	125	9	13.0002	23.4483	-0.102552	0.172958	0.27551	0.5654
0	3	126	9	12.5934	23.4091	0.00207499	0.22836	0.226285	0.570605
0	3	127	9	11.6257	23.3666	0.0634284	0.140473	0.0770443	0.29465
0	3	128	9	11.6101	23.3888	-0.0866207	0.250563	0.337184	0.598057
0	3	129	9	12.2495	23.6295	0.0170116	0.211273	0.194262	0.310409
0	3	130	9	11.9393	23.3468	0.0123924	0.139573	0.127181	0.434085
0	3	131	9	13.3817	24.0118	-0.00525838	0.270681	0.275939	0.485565
0	3	132	9	12.2136	24.9834	-0.0288737	0.305356	0.33423	0.372238
0	3	133	9	12.1317	23.974	0.0229421	0.325095	0.302153	0.492009
0	3	134	9	11.3093	23.0818	-0.00366243	0.278529	0.282191	0.644191
0	3	135	9	12.7471	23.5121	0.0056871	0.250359	0.244672	0.477449
0	3	136	9	13.0245	24.0908	0.0259814	0.202565	0.176584	0.370385
0	3	137	9	12.2617	23.6166	0.0229592	0.237689	0.21473	0.376378
0	3	138	9	12.8994	23.7607	-0.0909619	0.293943	0.384905	0.548873
0	3	139	9	12.262	23.1201	0.103658	0.215616	0.111959	0.340224
0	3	140	9	12.8844	25.0072	0.046537	0.267233	0.220696	0.388997
0	3	141	9	12.7177	23.9306	-0.00164789	0.265411	0.267058	0.46979
0	3	142	9	12.3941	23.4342	0.0208255	0.270975	0.25015	0.637406
0	3	143	9	13.1335	24.6774	-0.0373907	0.181236	0.218627	0.422179
0	3	144	9	12.512	23.2947	0.0572427	0.238309	0.181066	0.39575
0	3	145	9	12.5363	23.3157	0.0396953	0.142489	0.102794	0.377759
0	3	146	9	12.24	24.5184	0.0584151	0.273708	0.215293	0.415869
0	3	147	9	12.042	24.3043	0.00502127	0.241726	0.236705	0.529029
0	3	148	9	13.0554	24.3506	0.0486772	0.31574	0.267062	0.373076
0	3	149	9	12.7356	23.9936	-0.0308381	0.172921	0.203759	0.478803
0	3	150	9	13.5163	23.7145	-0.027215	0.176789	0.204004	0.473957
0	3	151	9	11.3937	23.514	0.0360091	0.238177	0.202168	0.35875
0	3	152	9	11.2736	23.3127	-0.00279803	0.157611	0.160409	0.314627
0	3	153	9	12.4886	23.8454	0.0715246	0.234475	0.162951	0.363847
0	3	154	9	13.3561	24.3223	0.0495156	0.302942	0.253427	0.57369
0	3	155	9	13.0187	24.2464	-0.0235579	0.345204	0.368762	0.516235
0	3	156	9	12.3972	24.2588	-0.0577605	0.255116	0.312877	0.549654
0	3	157	9	12.6564	24.3673	0.120872	0.203395	0.0825226	0.393783
0	3	158	9	12.6045	23.8278	0.0717405	0.193904	0.122164	0.38825
0	3	159	9	11.2869	23.1204	0.0149973	0.206419	0.191421	0.52273
0	3	160	9	12.1388	23.6511	-0.0059504	0.246921	0.252871	0.41386
0	3	161	9	12.5595	23.0612	0.117124	0.25005	0.132926	0.32389
0	3	162	9	12.5818	23.4403	0.0258789	0.317025	0.291146	0.522186
0	3	163	9	12.5265	24.2798	-0.01076	0.272498	0.283258	0.470411
0	3	164	9	12.8383	23.3262	0.046894	0.150718	0.103824	0.397009
0	3	165	9	12.4052	23.4379	0.299269	0.290999	-0.00827085	0.257064
0	3	166	9	12.579	24.3001	0.0438394	0.283809	0.239969	0.507698
0	3	167	9	12.522	24.2233	-0.0827705	0.33887	0.421641	0.610556
0	3	168	9	12.9559	23.5819	-0.0646893	0.329895	0.394584	0.562713
0	3	169	9	13.065	23.8935	0.0790462	0.30154	0.222494	0.533513
0	3	170	9	12.9706	23.2714	0.0504232	0.239626	0.189203	0.415727
0	3	171	9	13.1727	23.5283	-0.0451316	0.291266	0.336397	0.557465
0	3	172	9	12.5791	23.788	0.0772813	0.294807	0.217526	0.435893
0	3	173	9	12.9668	24.6737	0.230443	0.35226	0.121817	0.260248
0	3	174	9	13.0443	24.4676	-0.0757514	0.315787	0.391538	0.433491
0	3	175	9	12.5416	23.0922	0.202349	0.305495	0.103146	0.40117
0	3	176	9	12.9929	24.437	0.052892	0.289561	0.236669	0.540798
0	3	177	9	11.5051	23.4194	-0.0210871	0.180678	0.201765	0.590886
0	3	178	9	12.4513	24.1841	0.124352	0.287532	0.163181	0.376091
0	3	179	9	12.2547	23.8113	0.0889468	0.255627	0.16668	0.3554
0	3	180	9	11.9165	22.9555	-0.0111831	0.24237	0.253553	0.427805
0	3	181	9	12.334	23.4314	-0.0815523	0.245345	0.326897	0.523973
0	3	182	9	11.0032	23.5075	0.0023346	0.230969	0.228634	0.535994
0	3	183	9	12.1462	24.3001	0.0389209	0.234876	0.195955	0.356886
0	3	184	9	11.2857	24.4069	0.0431578	0.206241	0.163083	0.411227
0	3	185	9	13.2113	25.2067	-0.161533	0.211158	0.372691	0.617355
0	3	186	9	13.1798	24.5343	-0.0381929	0.174256	0.212449	0.487662
0	3	187	9	12.5227	23.7933	0.0858902	0.214804	0.128914	0.386779
0	3	188	9	12.9155	24.6552	-0.0088648	0.204231	0.213095	0.456741
0	3	189	9	12.8084	24.2279	0.0245284	0.278125	0.253596	0.490785
0	3	190	9	13.0441	24.1469	0.113437	0.208164	0.0947271	0.387365
0	3	191	9	12.766	24.3241	0.0233848	0.126814	0.103429	0.35583
0	3	192	9	12.8688	24.5839	0.0137335	0.175304	0.161571	0.377712
0	3	193	9	12.7468	24.2081	0.0644337	0.193947	0.129513	0.422765
0	3	194	9	13.0194	24.2103	0.0313003	0.275972	0.244671	0.41073
0	3	195	9	12.2078	24.45	0.128535	0.325812	0.197278	0.449618
0	3	196	9	12.2087	23.6011	0.167603	0.199635	0.0320312	0.220484
0	3	197	9	12.5901	25.2297	0.0278492	0.217127	0.189278	0.329804
0	3	198	9	12.8964	23.0418	-0.0795322	0.170365	0.249898	0.454216
0	3	199	9	12.5139	23.8563	-0.0382943	0.184252	0.222546	0.421573
0	3	200	9	12.815	23.4408	-0.0149201	0.110015	0.124936	0.346813
0	3	201	9	12.3419	24.1541	-0.0155881	0.153944	0.169532	0.459436
0	3	202	9	11.5329	24.123	0.00256043	0.17983	0.17727	0.437319
0	3	203	9	12.7595	23.7665	0.134684	0.217672	0.0829881	0.302671
0	3	204	9	12.8375	24.7185	-0.0849389	0.261838	0.346776	0.568736
0	3	205	9	13.3192	25.262	0.0357106	0.223049	0.187339	0.345962
0	3	206	9	12.6966	23.2004	-0.0551928	0.211049	0.266241	0.567353
0	3	207	9	13.2578	23.3027	-0.0804375	0.224826	0.305264	0.42942
0	3	208	9	12.5598	24.5354	-0.0395922	0.179468	0.21906	0.413462
0	3	209	9	12.8301	25.0805	0.0450858	0.323184	0.278099	0.421258
0	3	210	9	12.7208	23.3214	0.00641952	0.186949	0.18053	0.319154
0	3	211	9	13.245	23.2343	-0.0497913	0.127855	0.177646	0.476863
0	3	212	9	12.0801	24.1641	-0.00255712	0.355696	0.358253	0.425147
0	3	213	9	11.6728	23.8713	-0.0292598	0.157536	0.186796	0.393135
0	3	214	9	11.8395	23.9049	-0.0241074	0.147116	0.171223	0.59135
0	3	215	9	12.7955	23.4526	-0.0863379	0.199221	0.285559	0.521747
0	3	216	9	12.9421	23.3811	-0.0949031	0.294488	0.389391	0.541518
0	3	217	9	12.1232	24.0127	0.139771	0.212769	0.0729974	0.298013
0	3	218	9	12.8834	23.726	-0.0494642	0.240517	0.289981	0.509602
0	3	219	9	13.1258	24.0148	-0.0277531	0.208242	0.235995	0.461587
0	3	220	9	12.9354	23.9431	-0.021341	0.161843	0.183184	0.346749
0	3	221	9	12.7036	23.7149	-0.0339366	0.208967	0.242903	0.465509
0	3	222	9	12.9129	23.4224	-0.0883595	0.193319	0.281679	0.65392
0	3	223	9	12.4655	23.3483	0.0641454	0.185233	0.121088	0.396
0	3	224	9	12.3309	23.1325	-0.0279327	0.159404	0.187336	0.493023
0	3	225	9	12.5721	23.7024	0.0292108	0.300599	0.271388	0.47633
0	3	226	9	12.2008	23.4863	0.0221043	0.0624451	0.0403408	0.359905
0	3	227	9	13.1111	24.5238	-0.045782	0.329105	0.374887	0.700411
0	3	228	9	13.1299	23.4705	-0.042751	0.289255	0.332006	0.627897
0	3	229	9	13.2643	24.3782	-0.130687	0.141029	0.271716	0.573375
0	3	230	9	13.3998	24.0956	-0.0752579	0.202412	0.27767	0.496308
0	3	231	9	13.3665	22.8789	0.0211154	0.230713	0.209597	0.336633
0	3	232	9	12.296	23.7314	0.0269717	0.194475	0.167503	0.28376
0	3	233	9	13.0625	24.5876	-0.0120818	0.0873396	0.0994213	0.393113
0	3	234	9	12.6914	23.833	0.130192	0.276641	0.146449	0.37016
0	3	235	9	12.7673	25.488	0.0886643	0.25936	0.170696	0.433768
0	3	236	9	13.3505	23.9617	-0.122419	0.240898	0.363318	0.463198
0	3	237	9	11.8328	23.6372	-0.119944	0.205579	0.325524	0.502035
0	3	238	9	12.9775	23.6023	0.0687595	0.174677	0.105917	0.285032
0	3	239	9	13.0322	24.6663	-0.0137035	0.109984	0.123688	0.335917
0	3	240	9	12.264	23.7143	0.128169	0.182005	0.0538365	0.291392
0	3	241	9	13.2223	23.6882	0.308479	0.197888	-0.110591	0.277821
0	3	242	9	12.198	23.8688	-0.0478154	0.206367	0.254182	0.461769
0	3	243	9	13.0093	24.1742	0.0470737	0.142806	0.0957326	0.302487
0	3	244	9	13.4122	24.2541	-0.113504	0.0746581	0.188162	0.416651
0	3	245	9	12.8631	24.1499	-0.0267795	0.12315	0.149929	0.360108
0	3	246	9	13.1585	23.4319	-0.0526303	0.178505	0.231136	0.309111
0	3	247	9	11.9893	23.4786	-0.0446167	0.19089	0.235507	0.366547
0	3	248	9	12.1173	25.7365	0.0623022	0.21673	0.154428	0.364454
0	3	249	9	13.3627	25.0862	-0.152841	0.213881	0.366722	0.592899
0	3	250	9	11.9306	23.2991	-0.0423957	0.106424	0.14882	0.350154
0	3	251	9	13.1882	24.11	-0.00834356	0.126281	0.134624	0.404732
0	3	252	9	13.1553	23.5971	-0.104741	0.202111	0.306852	0.40244
0	3	253	9	13.177	24.7329	0.0195895	0.197189	0.1776	0.366617
0	3	254	9	13.2474	24.157	0.0674334	0.184566	0.117132	0.318663
0	3	255	9	13.039	24.6784	-0.0686157	0.265611	0.334227	0.328676
0	3	256	9	12.7938	23.8404	-0.0264486	0.0711578	0.0976064	0.308846
0	3	257	9	12.1981	25.7296	-0.0432271	0.354811	0.398038	0.453183
0	3	258	9	11.9449	24.4021	-0.0178924	0.179948	0.197841	0.450797
0	3	259	9	12.3245	23.1357	-0.10981	0.11533	0.22514	0.422709
0	3	260	9	12.8897	24.6125	-0.0562245	0.199703	0.255928	0.429556
0	3	261	9	13.1907	24.4365	-0.0945975	0.174277	0.268874	0.40195
0	3	262	9	13.0059	23.722	-0.105906	0.250912	0.356818	0.523726
0	3	263	9	13.2262	24.9051	-0.0787167	0.207601	0.286318	0.488539
0	3	264	9	12.0305	23.5526	0.0199069	0.0938946	0.0739877	0.245333
0	3	265	9	12.4629	23.4555	-0.0119866	0.135556	0.147542	0.348026
0	3	266	9	11.8777	23.0137	0.00673544	0.0762869	0.0695514	0.285817
0	3	267	9	12.5076	23.8458	-0.0654838	0.087695	0.153179	0.395126
0	3	268	9	12.3938	24.7399	0.0734556	0.208243	0.134788	0.325633
0	3	269	9	12.3228	23.1148	-0.0015645	0.0958572	0.0974217	0.310674
0	3	270	9	12.3058	23.855	-0.0787648	0.146663	0.225428	0.42306
0	3	271	9	11.6255	23.8161	0.0470678	0.202734	0.155666	0.225018
0	3	272	9	11.3758	23.8416	-0.0494459	0.0719296	0.121375	0.259674
0	3	273	9	12.8087	23.9413	-0.0167715	0.116818	0.133589	0.326527
0	3	274	9	12.8073	23.517	-0.0314349	0.114863	0.146298	0.367243
0	3	275	9	11.7591	23.1175	-0.0643968	0.107702	0.172099	0.35599
0	3	276	9	12.7254	24.6307	-0.055276	0.112995	0.168271	0.3804
0	3	277	9	12.3554	24.0822	0.00407735	0.157635	0.153558	0.38545
0	4	278	9	12.2548	22.9833	0.0504725	0.254197	0.203725	0.508281
0	4	279	9	11.4668	22.928	-0.0742074	0.201887	0.276094	0.481261
0	4	280	9	12.2714	22.9448	-0.0817138	0.147416	0.22913	0.474092
0	4	281	9	11.7614	22.9872	-0.0178745	0.125963	0.143838	0.347207
0	4	282	9	12.4733	23.3683	0.0892211	0.225397	0.136176	0.394824
0	4	283	9	11.9957	23.6646	0.0764675	0.225476	0.149008	0.473773
0	4	284	9	13.1023	24.7855	-0.0445594	0.345638	0.390198	0.470675
0	4	285	9	11.7126	23.3959	0.0653892	0.216763	0.151374	0.327144
0	4	286	9	11.4982	24.2555	0.0784656	0.265908	0.187443	0.382427
0	4	287	9	11.6226	23.7065	-0.0551003	0.172671	0.227771	0.457385
0	4	288	9	10.9016	23.3928	-0.0198746	0.220863	0.240738	0.476905
0	4	289	9	11.9174	22.7772	-0.0634532	0.254023	0.317477	0.598551
0	4	290	9	11.3231	23.3182	-0.0264949	0.273316	0.299811	0.510267
0	4	291	9	12.2201	23.8396	0.132578	0.321646	0.189068	0.41465
0	4	292	9	11.995	24.6014	0.00813501	0.416652	0.408517	0.590515
0	4	293	9	12.297	22.8156	-0.0786359	0.211953	0.290589	0.609503
0	4	294	9	12.9126	23.1013	0.237038	0.141525	-0.0955122	-0.0693582
0	4	295	9	11.4954	23.8314	0.112555	0.105918	-0.00663632	0.316007
0	4	296	9	12.5981	23.8569	-0.0515977	0.256537	0.308134	0.699236
0	4	297	9	11.3457	22.6944	0.032258	0.207509	0.175251	0.374343
0	4	298	9	12.4233	22.6562	0.255786	0.212863	-0.0429225	0.385408
0	4	299	9	11.091	24.3711	0.0230581	0.225573	0.202514	0.452861
0	4	300	9	10.9548	22.5402	0.0199595	0.188044	0.168084	0.458309
0	4	301	9	10.8724	23.5459	0.0366781	0.15144	0.114762	0.400686
0	4	302	9	10.9519	23.7391	0.0350236	0.255431	0.220408	0.503766
0	4	303	9	13.136	23.2927	0.00287719	0.104624	0.101747	0.438197
0	4	304	9	12.519	22.9678	0.0509375	0.173658	0.12272	0.530774
0	4	305	9	12.6151	23.6598	0.0729969	0.213176	0.140179	0.498515
0	4	306	9	11.6412	24.2925	-0.146813	0.238396	0.385209	0.697419
0	4	307	9	10.8042	24.061	-0.0186024	0.115112	0.133714	0.553169
0	4	308	9	12.0093	22.85	0.0382567	0.0710545	0.0327978	0.350735
0	4	309	9	12.0108	23.9384	-0.029184	0.123794	0.152978	0.374417
0	4	310	9	12.1953	23.9583	0.038428	0.306684	0.268256	0.393782
0	4	311	9	12.1311	23.1169	0.104664	0.118913	0.014249	0.309767
0	4	312	9	13.2477	24.7339	-0.0279923	0.146361	0.174353	0.465144
0	4	313	9	12.5736	23.0543	-0.0246642	0.147713	0.172378	0.506953
0	4	314	9	10.9556	23.6179	0.0359652	0.249164	0.213199	0.431614
0	4	315	9	12.7107	23.0411	-0.0360863	0.0720334	0.10812	0.402139
0	4	316	9	11.7838	22.7027	0.134171	0.271491	0.13732	0.393306
0	4	317	9	12.7752	24.4619	-0.00898644	0.155937	0.164924	0.428009
0	4	318	9	11.7705	23.124	0.0797184	0.197612	0.117894	0.372228
0	4	319	9	12.1411	23.5398	-0.0455807	0.183894	0.229475	0.392039
0	4	320	9	11.1	23.3421	0.0729231	0.25935	0.186427	0.48756
0	4	321	9	11.7223	23.2898	0.120568	0.202241	0.0816729	0.387293
0	4	322	9	12.5247	24.4328	0.00117831	0.237015	0.235836	0.507947
0	4	323	9	12.3419	23.9741	-0.000305545	0.214059	0.214365	0.52249
0	4	324	9	11.9103	24.6336	0.0878382	0.224994	0.137156	0.41163
0	4	325	9	12.6817	24.5579	0.011996	0.224184	0.212188	0.465626
0	4	326	9	12.9655	24.0864	0.0412857	0.301293	0.260008	0.479391
0	4	327	9	12.3755	24.8605	0.0740969	0.363593	0.289496	0.50945
0	4	328	9	12.0661	24.8714	-0.0513337	0.155623	0.206957	0.57883
0	4	329	9	12.5165	23.5228	0.0378889	0.159116	0.121227	0.399691
0	4	330	9	11.878	23.2845	0.0452287	0.135116	0.0898871	0.408352
0	4	331	9	13.1216	23.3639	-0.0475621	0.118685	0.166248	0.470402
0	4	332	9	12.3778	24.88	0.244852	0.240544	-0.00430757	0.421896
0	4	333	9	12.7212	24.7248	-0.111677	0.0891757	0.200853	0.595087
0	4	334	9	12.3985	23.7236	0.0685463	0.221483	0.152937	0.471662
0	4	335	9	12.2587	23.56	0.0995749	0.247397	0.147822	0.421381
0	4	336	9	12.0885	23.1884	0.0468797	0.120975	0.0740956	0.386021
0	4	337	9	12.3624	24.0979	-0.0176763	0.198003	0.21568	0.516174
0	4	338	9	12.5307	23.9741	0.056186	0.258451	0.202265	0.484127
0	4	339	9	11.9231	23.4951	0.00122541	0.175149	0.173923	0.530876
0	4	340	9	12.5572	22.8598	-0.054965	0.216444	0.271409	0.469782
0	4	341	9	12.4031	23.2808	-0.061383	0.0935438	0.154927	0.484608
0	4	342	9	12.8359	23.5272	-0.0199384	0.148268	0.168206	0.389457
0	4	343	9	12.9157	24.4639	0.137893	0.187333	0.0494401	0.318255
0	4	344	9	11.6571	24.4034	0.0428667	0.219256	0.176389	0.377252
0	4	345	9	11.9765	24.1199	-0.118438	0.238623	0.357061	0.426388
0	4	346	9	11.4927	24.6983	-0.0151085	0.226431	0.241539	0.460112
0	4	347	9	11.8568	24.7217	-0.037213	0.192867	0.23008	0.400363
0	4	348	9	12.2594	23.2315	-0.0939348	0.095633	0.189568	0.503198
0	4	349	9	12.6796	23.8465	-0.105612	0.212992	0.318604	0.508346
0	4	350	9	10.892	23.1228	-0.00836321	0.0396838	0.048047	0.337151
0	4	351	9	12.7376	23.8455	-0.0785685	0.0402528	0.118821	0.491012
0	4	352	9	12.2041	23.417	-0.025189	0.0416939	0.0668828	0.332853
0	4	353	9	12.4173	23.9886	-0.2214	0.0357313	0.257131	0.529762
0	4	354	9	11.6508	22.5684	-0.0148192	0.027964	0.0427832	0.312065
0	4	355	9	12.4696	23.3607	-0.16449	0.066305	0.230795	0.56678
0	4	356	9	12.7714	24.0386	-0.00604638	0.0923333	0.0983797	0.391434
0	4	357	9	11.9592	24.0995	-0.038435	0.0743127	0.112748	0.485549
0	4	358	9	12.1384	23.9735	-0.0601071	0.123548	0.183655	0.415381
0	4	359	9	12.4388	22.9075	-0.162509	0.0123613	0.174871	0.433458
0	4	360	9	11.2991	24.5448	-0.150453	0.122949	0.273401	0.517127
0	4	361	9	12.7394	23.1127	-0.137594	0.134841	0.272435	0.568927
0	4	362	9	11.3146	24.0004	0.0103898	0.106558	0.0961683	0.412013
0	4	363	9	12.3186	22.5886	-0.127841	-0.0662719	0.0615692	0.346849
0	4	364	9	12.6697	23.634	-0.183337	0.0348566	0.218194	0.485205
0	4	365	9	12.4829	23.1813	-0.0519623	0.100966	0.152928	0.4435
0	4	366	9	12.0231	23.9538	0.0456661	0.0703678	0.0247016	0.325612
0	4	367	9	12.8836	23.1879	-0.0763511	0.0746039	0.150955	0.5182
0	4	368	9	12.6349	23.3425	0.177979	0.12955	-0.0484297	0.220465
0	4	369	9	12.3401	23.3299	-0.00811633	0.0511479	0.0592642	0.452013
0	4	370	9	13.1494	23.9539	-0.0709954	0.118663	0.189658	0.38178
0	4	371	9	12.5876	24.2035	0.0215229	0.162089	0.140566	0.409027
0	4	372	9	12.4209	22.8534	-0.0162936	0.113813	0.130107	0.411331
0	4	373	9	11.8273	22.8032	0.00719352	0.0904822	0.0832886	0.445916
0	4	374	9	11.2955	24.7661	-0.0754389	0.191591	0.26703	0.53798
0	5	375	9	12.1283	22.7984	0.350691	0.311727	-0.0389643	0.469938
0	5	376	9	12.2375	23.9774	-0.0843327	0.226525	0.310857	0.641591
0	5	377	9	10.566	24.0156	0.0733801	0.328967	0.255587	0.485086
0	5	378	9	12.6003	24.4323	0.0874529	0.310649	0.223196	0.50783
0	5	379	9	12.5503	23.7969	0.0543356	0.20295	0.148614	0.481085
0	5	380	9	10.8588	23.2362	0.00786626	0.215751	0.207885	0.463489
0	5	381	9	12.9275	23.4511	0.00165434	0.19375	0.192096	0.492469
0	5	382	9	12.4751	24.3423	-0.0164469	0.154887	0.171334	0.524524
0	5	383	9	11.3707	24.0161	-0.019577	0.312378	0.331955	0.679376
0	5	384	9	12.6802	24.978	0.0969462	0.251763	0.154817	0.362168
0	5	385	9	12.2175	23.6548	0.0256102	0.228194	0.202584	0.475119
0	5	386	9	11.356	24.0857	-0.0772314	0.284938	0.36217	0.639522
0	5	387	9	11.1887	23.5405	-0.0295176	0.155387	0.184904	0.56429
0	5	388	9	12.6724	24.1785	0.103304	0.26177	0.158467	0.457904
0	5	389	9	12.4674	23.2275	0.132095	0.409381	0.277286	0.421554
0	5	390	9	12.1276	23.3316	0.124713	0.224952	0.100239	0.372937
0	5	391	9	11.99	23.2667	0.179205	0.238698	0.0594928	0.254334
0	5	392	9	12.2121	23.6244	0.152869	0.323891	0.171022	0.300294
0	5	393	9	12.7095	22.8812	0.0376079	0.334527	0.296919	0.411036
0	5	394	9	11.4838	23.2392	-0.077659	0.173288	0.250947	0.634811
0	5	395	9	12.7697	23.3695	0.0286475	0.267904	0.239256	0.542913
0	5	396	9	12.0255	22.5385	-0.112663	0.266859	0.379522	0.618457
0	5	397	9	11.5476	22.9237	0.123283	0.309141	0.185858	0.372283
0	5	398	9	10.747	23.1689	0.0181837	0.218822	0.200638	0.482271
0	5	399	9	12.98	22.7407	-0.00669749	0.291026	0.297723	0.527988
0	5	400	9	11.0258	24.1628	0.0359069	0.294329	0.258422	0.511065
0	5	401	9	12.5183	22.884	0.0278708	0.428272	0.400401	0.573561
0	5	402	9	12.5037	23.2341	-0.0366866	0.469878	0.506565	0.735858
0	5	403	9	10.7701	24.4696	0.11319	0.44388	0.330689	0.515719
0	5	404	9	12.014	24.1678	0.00111577	0.312731	0.311616	0.50555
0	5	405	9	11.8131	24.1637	0.0925561	0.350033	0.257477	0.402995
0	5	406	9	12.7751	24.0076	0.110312	0.313374	0.203062	0.428446
0	5	407	9	12.4359	23.4103	-0.0462436	0.316953	0.363196	0.607492
0	5	408	9	12.4836	24.4231	0.20971	0.292838	0.0831283	0.237638
0	5	409	9	12.3925	23.2793	0.0154511	0.32376	0.308309	0.694274
0	5	410	9	11.8424	23.0295	-0.0513928	0.280261	0.331654	0.658492
0	5	411	9	12.1799	23.3575	0.0438305	0.228864	0.185034	0.612405
0	5	412	9	13.2058	23.7048	0.00587731	0.225959	0.220082	0.611148
0	5	413	9	12.3057	23.1688	-0.0558654	0.432713	0.488578	0.66802
0	5	414	9	11.5533	23.412	-0.189357	0.318351	0.507708	0.901345
0	5	415	9	11.8376	23.0482	-0.0361319	0.281057	0.317189	0.619089
0	5	416	9	13.3072	22.7985	-0.00750383	0.174118	0.181622	0.279036
0	5	417	9	13.2126	23.5522	0.0476166	0.279211	0.231594	0.552546
0	5	418	9	12.8769	23.3818	-0.0828974	0.172592	0.255489	0.490222
0	5	419	9	11.9056	22.8052	-0.0522404	0.303407	0.355648	0.626738
0	5	420	9	12.7869	23.2979	0.186317	0.245595	0.0592775	0.427226
0	5	421	9	11.6384	24.4579	0.228362	0.369816	0.141454	0.496077
0	5	422	9	12.4563	23.0357	0.0528439	0.349543	0.296699	0.444951
0	5	423	9	11.7882	23.0697	-0.136965	0.322655	0.45962	0.684389
0	5	424	9	11.6026	22.8367	0.227369	0.216428	-0.0109407	0.300258
0	5	425	9	10.8889	23.507	0.0899695	0.24134	0.151371	0.444478
0	5	426	9	12.9486	24.0032	0.143323	0.277983	0.13466	0.351402
0	5	427	9	11.8009	23.7835	-0.00207504	0.340769	0.342844	0.575037
0	5	428	9	11.9917	23.2438	-0.0374954	0.241481	0.278976	0.556975
0	5	429	9	11.5476	22.5963	-0.0930882	0.148015	0.241103	0.484062
0	5	430	9	12.2241	22.6687	-0.00874345	0.204912	0.213655	0.515676
0	5	431	9	11.5445	23.4846	-0.120164	0.197549	0.317713	0.643045
0	5	432	9	11.318	23.7083	0.0655881	0.277993	0.212405	0.440318
0	5	433	9	12.1371	22.8174	0.143908	0.186658	0.04275	0.304144
0	5	434	9	13.2089	23.9572	0.0286169	0.212561	0.183944	0.304578
0	5	435	9	11.8407	23.6302	0.0564347	0.193305	0.13687	0.449344
0	5	436	9	12.0498	23.9502	-0.0208156	0.28715	0.307966	0.52436
0	5	437	9	12.6378	23.3949	-0.0373604	0.204094	0.241454	0.505752
0	5	438	9	12.9267	23.9926	0.116519	0.162825	0.0463063	0.370325
0	5	439	9	11.9404	23.943	0.0299508	0.314802	0.284851	0.481474
0	5	440	9	11.8343	24.3756	-0.145302	0.213762	0.359063	0.647621
0	5	441	9	11.1571	24.6253	0.00632154	0.24443	0.238108	0.701323
0	5	442	9	12.6239	23.208	0.37857	0.396932	0.0183617	0.181977
0	5	443	9	11.8061	22.5526	-0.0536838	0.18519	0.238874	0.507545
0	5	444	9	13.0963	22.7543	0.0695059	0.289046	0.219541	0.361473
0	5	445	9	12.5285	23.4171	-0.0646423	0.238157	0.302799	0.485225
0	5	446	9	11.0471	24.3536	-0.10975	0.210666	0.320417	0.662782
0	5	447	9	12.3061	23.2596	-0.0857482	0.159018	0.244766	0.502249
0	5	448	9	11.3336	22.8648	0.0473967	0.227433	0.180036	0.440025
0	5	449	9	12.1936	23.3966	-0.0450443	0.177193	0.222237	0.457688
0	5	450	9	12.8048	23.5423	0.0240282	0.226184	0.202156	0.378245
0	5	451	9	10.828	24.8698	0.0473464	0.221891	0.174544	0.381726
0	5	452	9	11.6474	23.1602	-0.0211528	0.188035	0.209187	0.526026
0	5	453	9	12.7451	23.1628	0.00945607	0.205249	0.195793	0.397756
0	5	454	9	12.9269	23.5293	-0.068667	0.178721	0.247388	0.500149
0	5	455	9	10.718	22.9589	-0.0563479	0.110436	0.166784	0.524669
0	5	456	9	11.5768	24.2847	0.0152044	0.252916	0.237711	0.51444
0	5	457	9	12.437	23.2814	0.182886	0.316322	0.133436	0.357997
0	5	458	9	12.7562	23.5775	0.0072578	0.24614	0.238882	0.355855
0	5	459	9	13.1596	23.8104	0.0389411	0.209928	0.170987	0.306483
0	5	460	9	12.5829	23.8504	-0.048024	0.186359	0.234383	0.434745
0	5	461	9	10.8109	24.44	0.01951	0.216027	0.196517	0.381186
0	5	462	9	11.6513	23.1103	-0.0472281	0.348438	0.395666	0.674684
0	5	463	9	11.9144	22.5672	0.231801	0.310955	0.0791539	0.346357
0	5	464	9	12.3814	22.8439	-0.0748071	0.129171	0.203978	0.489916
0	5	465	9	11.7004	23.6229	0.351708	0.167433	-0.184275	0.108549
0	5	466	9	12.5564	23.7686	0.0329947	0.179719	0.146724	0.362374
0	5	467	9	11.8844	24.4969	-0.0217234	0.214404	0.236127	0.434823
0	5	468	9	12.577	24.3583	0.0499196	0.193888	0.143968	0.474793
0	5	469	9	11.4094	22.5319	-0.0562667	0.128232	0.184499	0.415995
0	5	470	9	12.7049	22.7891	0.00493686	0.138084	0.133148	0.341541
0	5	471	9	13.2157	22.5507	0.0217996	0.208465	0.186665	0.414502
0	5	472	9	11.4441	22.8075	0.0415053	0.280465	0.23896	0.39105
0	5	473	9	12.7257	24.2348	-0.0114583	0.302577	0.314035	0.353295
0	5	474	9	12.9214	24.2219	0.016616	0.30234	0.285724	0.435413
0	5	475	9	11.343	23.4391	-0.0471186	0.185039	0.232158	0.589241
0	5	476	9	12.3835	23.9615	-0.0365991	0.310844	0.347443	0.581519
0	5	477	9	12.3394	22.937	-0.0395665	0.157505	0.197071	0.538424
0	5	478	9	11.7513	23.1268	-0.0435747	0.261758	0.305332	0.500631
0	5	479	9	11.2563	22.8574	0.0143987	0.170193	0.155794	0.34643
0	5	480	9	12.2795	23.5262	-0.0271484	0.26155	0.288698	0.473923
0	5	481	9	11.5247	22.7649	-0.046728	0.159151	0.205879	0.412231
0	5	482	9	11.0259	23.0538	0.0238834	0.201945	0.178061	0.390906
0	5	483	9	12.2428	22.6872	-0.0645365	0.169125	0.233661	0.423468
0	5	484	9	10.9696	22.8771	0.0772693	0.217265	0.139995	0.349709
0	5	485	9	12.4882	23.0745	0.0931964	0.211786	0.118589	0.177266
0	5	486	9	12.4358	23.2362	-0.0251216	0.181549	0.206671	0.372758
0	5	487	9	12.3117	22.8067	-4.08639e-06	0.185161	0.185165	0.28696
0	5	488	9	12.0495	22.6196	-0.0895582	0.0774586	0.167017	0.369123
0	5	489	9	12.5953	22.9313	-0.0798551	0.0722365	0.152092	0.314077
0	5	490	9	11.9591	23.6512	-0.0474158	0.103705	0.151121	0.374402
0	5	491	9	12.9485	23.4528	0.0569202	0.168599	0.111679	0.317919
0	5	492	9	11.8527	22.9227	-0.0349415	0.198606	0.233548	0.403229
0	5	493	9	11.1284	23.8524	-0.0481483	0.128925	0.177074	0.503409
0	5	494	9	12.3261	22.8004	-0.0850153	0.12513	0.210146	0.433504
0	5	495	9	11.6421	23.3716	0.0096604	0.171591	0.16193	0.383728
0	5	496	9	11.8736	23.6224	-0.0226135	0.102164	0.124777	0.30342
0	5	497	9	13.1679	23.1943	0.0721495	0.123361	0.0512118	0.216274
0	5	498	9	12.5741	24.0082	-0.0246168	0.194339	0.218956	0.3354
0	5	499	9	12.3648	22.9349	0.0498242	0.303851	0.254027	0.281876
0	5	500	9	13.3349	24.505	0.0943238	0.121099	0.0267747	0.231605
0	5	501	9	13.0082	23.4187	-0.0549968	0.0195528	0.0745496	0.295859
0	5	502	9	12.5769	23.1661	-0.124149	0.0700622	0.194211	0.335174
0	5	503	9	12.2799	22.7635	-0.108887	0.0426093	0.151496	0.287097
0	5	504	9	11.5229	23.0153	-0.0413155	0.22652	0.267835	0.35015
0	5	505	9	13.0295	23.4387	-0.176025	0.147886	0.323911	0.412205
0	5	506	9	12.0312	24.4493	0.0824345	0.155065	0.0726307	0.303879
0	5	507	9	11.7	23.5114	-0.043114	0.16901	0.212124	0.405412
0	5	508	9	11.9721	24.2256	-0.095451	0.134287	0.229738	0.394619
0	5	509	9	12.796	23.3705	-0.00413217	0.0552394	0.0593715	0.192372
0	5	510	9	12.4146	23.712	-0.0933959	0.107841	0.201237	0.407846
0	5	511	9	10.8057	23.6618	-0.0291547	0.00631943	0.0354741	0.326631
0	5	512	9	11.3976	23.3639	-0.148761	0.0466327	0.195393	0.458308
0	5	513	9	12.0237	22.836	0.0683138	0.0293931	-0.0389206	0.21742
0	5	514	9	12.1108	23.2273	-0.0114168	0.00715144	0.0185682	0.236028
0	5	515	9	12.1912	23.8948	-0.0477958	0.142383	0.190179	0.326373
0	5	516	9	12.6532	22.8938	-0.0163799	0.0266973	0.0430772	0.243449
0	5	517	9	12.9121	23.3244	0.00455326	0.0598872	0.0553339	0.235597
0	5	518	9	12.1757	23.532	-0.0915431	0.0323043	0.123847	0.301807
0	5	519	9	12.4318	23.8476	0.01037	0.112887	0.102517	0.204291
0	5	520	9	11.5246	23.3769	0.013713	0.0709519	0.0572389	0.26732
0	5	521	9	11.6469	24.0705	-0.0280029	0.0974509	0.125454	0.279912
0	5	522	9	11.3131	22.8976	-0.0843545	0.151852	0.236207	0.417776
0	5	523	9	11.3423	23.5753	0.204833	0.122802	-0.0820308	0.262142
0	5	524	9	12.1211	23.6174	-0.0738484	0.147697	0.221546	0.392253
0	5	525	9	11.5142	24.1203	-0.0583251	0.0775055	0.135831	0.448038
0	5	526	9	12.6326	23.3118	-0.00347924	0.101778	0.105257	0.264432
0	5	527	9	11.474	24.1565	-0.0943038	0.239484	0.333788	0.418849
0	5	528	9	12.8506	23.1995	-0.035426	0.163924	0.19935	0.463743
0	5	529	9	11.4473	23.3707	-0.0320654	0.203852	0.235918	0.493215
0	5	530	9	12.0977	22.6792	-0.0975342	0.0864422	0.183976	0.431938
0	5	531	9	12.0902	22.8859	-0.029055	0.174827	0.203882	0.279753
0	5	532	9	12.6903	24.5784	-0.0473534	0.207621	0.254974	0.49048
0	5	533	9	12.0188	24.1739	-0.0231293	0.105752	0.128881	0.273679
0	5	534	9	11.6441	24.2622	0.0310608	0.074979	0.0439182	0.333117
0	5	535	9	11.5031	23.1015	0.0672996	0.0613637	-0.00593592	0.22008
0	5	536	9	10.9111	24.6998	-0.0747402	0.106519	0.181259	0.350213
0	5	537	9	12.9466	23.5372	0.0386024	-0.00840259	-0.047005	0.309517
0	5	538	9	11.8844	23.7101	0.0655188	0.0795228	0.0140041	0.0564177
0	5	539	9	11.9011	22.9133	-0.0544139	0.140094	0.194508	0.341536
0	5	540	9	12.1672	22.6033	-0.103786	0.0215232	0.125309	0.243962
0	5	541	9	11.1759	22.8423	-0.128955	0.0981905	0.227145	0.383442
0	5	542	9	11.9601	23.8426	-0.120004	0.122097	0.2421	0.425611
0	5	543	9	12.3541	23.3773	0.000128133	0.0643165	0.0641884	0.216534
0	5	544	9	13.2846	22.8682	-0.0547733	0.0880071	0.14278	0.314557
0	5	545	9	12.827	22.7967	-0.090212	0.130149	0.220361	0.284644
0	5	546	9	12.7685	22.5229	-0.0891633	0.0409839	0.130147	0.337931
0	5	547	9	11.096	23.4474	-0.0657678	0.181741	0.247508	0.393322
0	5	548	9	12.436	22.8772	-0.0445326	0.104137	0.14867	0.377852
0	5	549	9	11.3319	23.5726	-0.0716758	0.129643	0.201319	0.483459
0	5	550	9	12.835	23.1875	-0.11621	0.144753	0.260963	0.336903
0	5	551	9	11.5149	23.0653	-0.122855	0.171259	0.294115	0.536188
0	5	552	9	12.4009	23.0083	-0.0586333	0.127153	0.185786	0.333877
0	5	553	9	10.8757	23.7376	-0.14035	0.072311	0.212661	0.410452
0	5	554	9	11.6978	23.2937	-0.0654971	0.110713	0.17621	0.42936
0	5	555	9	12.7771	23.9279	-0.0920833	0.162188	0.254271	0.447312
0	5	556	9	11.4116	22.7375	-0.0944287	0.167364	0.261793	0.621665
0	5	557	9	13.0337	22.917	0.0463903	0.283802	0.237412	0.3682
0	6	558	9	12.134	23.121	-0.0370095	0.23754	0.274549	0.299567
0	6	559	9	13.507	23.7379	0.0204004	0.206303	0.185902	0.255833
0	6	560	9	12.1923	23.1224	-0.0909939	0.067822	0.158816	0.223613
0	6	561	9	13.0446	23.3213	-0.0572499	0.0749493	0.132199	0.36965
0	6	562	9	13.2184	24.4108	0.0492979	0.11286	0.0635622	0.317646
0	6	563	9	12.2255	23.6908	-0.0754901	0.0940291	0.169519	0.28801
0	6	564	9	12.5657	23.8131	0.0569746	0.168062	0.111087	0.248981
0	6	565	9	12.2281	23.6698	0.0124265	0.114825	0.102398	0.267073
0	6	566	9	13.2513	23.4261	0.0630489	0.193469	0.13042	0.306664
0	6	567	9	12.2478	24.3193	-0.0674349	0.134942	0.202377	0.336154
0	6	568	9	11.1093	24.0455	-0.075024	0.0660515	0.141075	0.260811
0	6	569	9	12.5046	23.1336	-0.00792661	0.120453	0.128379	0.298408
0	6	570	9	11.6425	24.1187	-0.00772684	0.10232	0.110047	0.319783
0	6	571	9	12.464	24.1602	0.0056156	0.037314	0.0316984	0.225733
0	6	572	9	12.9688	23.3411	-0.0640026	0.145516	0.209518	0.259368
0	6	573	9	11.9166	23.967	-0.061431	0.146412	0.207843	0.363353
0	6	574	9	12.9153	24.4314	-0.0680516	0.0986581	0.16671	0.315788
0	6	575	9	13.1923	23.1565	0.00426104	0.0829858	0.0787247	0.300584
0	6	576	9	12.5046	23.6871	0.0217456	0.0868763	0.0651307	0.251975
0	6	577	9	13.4552	23.9131	-0.0495967	0.130255	0.179852	0.375434
0	6	578	9	13.1107	24.1251	-0.047749	0.100696	0.148445	0.250729
0	6	579	9	11.8387	25.2897	0.0839782	0.196144	0.112165	0.250152
0	6	580	9	11.5728	23.2498	0.0454742	0.15562	0.110146	0.211533
0	6	581	9	11.5301	23.1907	-0.121478	0.134767	0.256245	0.493251
0	6	582	9	12.6459	23.5798	0.0501003	0.180928	0.130828	0.256254
0	6	583	9	13.3539	23.2909	0.0255085	0.218031	0.192522	0.322462
0	6	584	9	12.5356	24.1241	0.0529912	0.250906	0.197915	0.323084
0	6	585	9	12.6514	23.2854	0.192295	0.24698	0.0546854	0.0863782
0	6	586	9	13.3311	23.671	-0.0154775	0.169246	0.184724	0.26908
0	6	587	9	12.9445	23.6906	0.0106953	0.137487	0.126791	0.245928
0	6	588	9	12.5005	24.9456	0.0180284	0.110879	0.0928501	0.185352
0	6	589	9	11.7826	23.6182	-0.0576491	0.0841794	0.141829	0.310401
0	6	590	9	12.8931	23.5775	0.0394286	0.170656	0.131228	0.262409
0	6	591	9	11.8459	22.9363	-0.0183601	0.152179	0.170539	0.293163
0	6	592	9	12.5866	23.0423	-0.18561	0.0807376	0.266348	0.496426
0	6	593	9	13.2248	23.7497	-0.172796	0.119723	0.292519	0.350847
0	6	594	9	12.8328	23.6447	-0.0229092	0.116007	0.138916	0.30385
0	6	595	9	12.9057	24.0263	0.00519085	0.109105	0.103914	0.296436
0	6	596	9	12.4385	24.0675	-0.0354936	0.132544	0.168037	0.427922
0	6	597	9	13.0841	23.0611	0.0534483	0.1462	0.0927515	0.267121
0	6	598	9	11.8576	23.1715	-0.0129037	0.217371	0.230275	0.360394
0	6	599	9	12.9261	23.9145	0.0400099	0.250542	0.210532	0.463859
0	6	600	9	12.13	23.0234	-0.0490965	0.141354	0.190451	0.374792
0	6	601	9	12.7801	23.9672	0.0813112	0.199475	0.118164	0.269688
0	6	602	9	11.7055	23.7812	-0.113274	0.0645941	0.177868	0.389382
0	6	603	9	11.727	24.1558	-0.118684	0.106944	0.225628	0.453345
0	6	604	9	11.6748	25.2211	0.0096796	0.246359	0.236679	0.351676
0	6	605	9	12.1159	23.3565	0.0357758	0.140053	0.104277	0.272511
0	6	606	9	11.4899	23.5607	-0.0354852	0.162981	0.198466	0.32066
0	6	607	9	12.8188	23.6598	-0.0609609	0.224576	0.285537	0.484761
0	6	608	9	12.2189	23.5401	0.0897689	0.280559	0.19079	0.393745
0	6	609	9	12.0209	23.6984	0.108127	0.249719	0.141592	0.362019
0	6	610	9	12.635	24.2121	-0.0114863	0.163636	0.175122	0.282947
0	6	611	9	12.2919	23.1249	0.0187368	0.152951	0.134214	0.337883
0	6	612	9	13.767	24.267	-0.084834	0.133062	0.217896	0.25971
0	6	613	9	12.8115	23.1294	-0.0927951	0.0768322	0.169627	0.354039
0	6	614	9	11.4795	24.3681	-0.0203616	0.265567	0.285928	0.360517
0	6	615	9	12.404	23.9813	-0.086826	0.128023	0.214849	0.349035
0	6	616	9	13.1669	23.7118	-0.01055	0.138022	0.148572	0.36533
0	6	617	9	13.5257	23.4515	0.141121	0.26689	0.125769	0.227354
0	6	618	9	11.4056	23.7392	0.0557702	0.278683	0.222913	0.323764
0	6	619	9	13.5111	24.0649	0.00475783	0.231866	0.227108	0.399942
0	6	620	9	11.5031	23.3414	-0.0500362	0.0911877	0.141224	0.374531
0	6	621	9	13.2366	23.1555	-0.0971039	0.104994	0.202098	0.407824
0	6	622	9	13.1618	24.1107	-0.0516301	0.171357	0.222987	0.379042
0	6	623	9	12.5281	23.3199	-0.106171	0.214111	0.320282	0.552896
0	6	624	9	11.4969	23.6234	0.0839032	0.166536	0.0826323	0.40387
0	6	625	9	13.4074	23.5615	0.080033	0.296014	0.215981	0.465208
0	6	626	9	13.1935	23.0111	0.0354391	0.355724	0.320285	0.433512
0	6	627	9	12.7685	23.0357	-0.0794542	0.0370709	0.116525	0.385256
0	6	628	9	12.4872	23.5599	-0.0640469	0.139612	0.203659	0.381766
0	6	629	9	12.6674	23.4395	0.0377218	0.213723	0.176001	0.43713
0	6	630	9	12.6358	24.2542	0.0185357	0.221039	0.202503	0.567323
0	6	631	9	12.3303	23.3628	-0.0312384	0.320759	0.351998	0.42247
0	6	632	9	12.6064	23.5585	0.0655037	0.167059	0.101555	0.299131
0	6	633	9	13.156	25.0593	-0.023775	0.372485	0.39626	0.467641
0	6	634	9	12.652	24.3903	0.606383	0.263756	-0.342627	-0.188216
0	6	635	9	13.0863	23.2855	-0.0573063	0.110464	0.167771	0.469336
0	6	636	9	11.8022	23.2941	-0.0160526	0.134713	0.150766	0.360269
0	6	637	9	12.2511	23.623	0.0169274	0.20449	0.187562	0.387587
0	6	638	9	12.5621	24.1485	-0.029188	0.181306	0.210494	0.369738
0	6	639	9	11.3238	23.2368	0.0539229	0.20127	0.147347	0.276085
0	6	640	9	12.6553	23.3863	0.0815246	0.228658	0.147133	0.275685
0	6	641	9	11.6722	23.4503	0.013973	0.124187	0.110214	0.267825
0	6	642	9	11.7524	24.2047	0.0426125	0.134886	0.0922733	0.33579
0	6	643	9	11.6631	23.1571	-0.013123	0.165894	0.179017	0.375642
0	6	644	9	12.1021	23.0416	-0.0766745	0.0863633	0.163038	0.440134
0	6	645	9	11.7449	23.0272	0.10249	0.240227	0.137737	0.414709
0	6	646	9	12.5043	24.0873	-0.041618	0.199058	0.240676	0.495894
0	6	647	9	11.9503	23.2055	0.0729732	0.304935	0.231962	0.576676
0	6	648	9	12.3174	23.9362	0.0542584	0.13159	0.0773315	0.246252
0	6	649	9	12.0001	23.2219	0.0871714	0.244997	0.157826	0.329793
0	6	650	9	12.8769	23.7613	0.0425265	0.239966	0.197439	0.34378
0	6	651	9	13.0955	23.2011	0.0559733	0.245143	0.18917	0.413832
0	6	652	9	11.9572	24.0707	-0.0157841	0.254874	0.270658	0.51294
0	6	653	9	12.8024	23.3423	0.199798	0.151409	-0.0483892	0.0968689
0	6	654	9	12.3132	23.76	0.0871954	0.282453	0.195258	0.329041
0	6	655	9	13.1953	23.4323	0.0196129	0.283766	0.264153	0.510188
0	6	656	9	12.3529	23.479	0.0665122	0.247474	0.180962	0.370294
0	6	657	9	12.8573	23.0456	-0.00149132	0.199633	0.201124	0.404058
0	6	658	9	12.8396	24.0715	-0.0272009	0.22092	0.248121	0.485059
0	6	659	9	12.5047	23.6554	0.160955	0.264052	0.103096	0.208745
0	6	660	9	12.0235	23.0893	0.0340907	0.184037	0.149946	0.3355
0	6	661	9	12.2175	23.1843	0.132312	0.325278	0.192966	0.347073
0	6	662	9	12.5583	23.7714	0.00932213	0.292142	0.28282	0.415997
0	6	663	9	12.5295	23.5567	0.0269726	0.24622	0.219247	0.231614
0	6	664	9	12.5603	23.5294	0.208144	0.390807	0.182663	0.177871
0	6	665	9	12.4551	23.6886	-0.0516382	0.127831	0.179469	0.342098
0	6	666	9	12.5988	23.4615	0.0408419	0.211554	0.170712	0.34415
0	6	667	9	12.3171	22.9107	0.0300044	0.126524	0.0965192	0.343245
0	6	668	9	13.1685	23.8148	0.0333436	0.207576	0.174233	0.387908
0	6	669	9	11.8043	24.6939	0.0760117	0.086812	0.0108003	0.239007
0	6	670	9	11.4378	23.1215	0.0245752	0.208707	0.184132	0.336889
0	6	671	9	12.259	23.21	-0.0655609	0.109409	0.17497	0.352322
0	6	672	9	13.1138	23.6459	-0.0671013	0.199521	0.266622	0.429398
0	6	673	9	12.8943	24.2575	-0.0930332	0.214115	0.307148	0.642674
0	6	674	9	12.2798	23.6361	0.0488067	0.219535	0.170728	0.367848
0	6	675	9	13.382	23.8225	0.0442301	0.105483	0.0612525	0.218454
0	6	676	9	12.4221	23.0528	-0.0317258	0.355774	0.3875	0.440248
0	6	677	9	11.9898	23.3302	-0.00783222	0.194122	0.201954	0.346181
0	6	678	9	12.2595	24.2466	0.00242249	0.128493	0.12607	0.396359
0	6	679	9	13.4141	23.6359	-0.0798451	0.170841	0.250686	0.413989
0	6	680	9	12.7077	23.7918	-0.0741689	0.222347	0.296516	0.436212
0	6	681	9	11.9145	24.7106	0.133382	0.175026	0.0416438	0.283589
0	6	682	9	11.4175	23.2503	0.034271	0.06713	0.032859	0.254392
0	6	683	9	12.6019	23.9633	-0.012446	0.100558	0.113004	0.368367
0	6	684	9	12.9214	22.9523	0.0370433	0.073796	0.0367528	0.306205
0	6	685	9	11.6693	24.4951	-0.0288724	0.170085	0.198957	0.375934
0	6	686	9	11.3882	25.6039	-0.0668742	0.184208	0.251083	0.425419
0	6	687	9	12.4546	23.1925	0.0759223	0.11709	0.041168	0.436707
0	6	688	9	11.5311	23.6348	0.0486701	0.281292	0.232622	0.318073
0	6	689	9	12.1169	23.2882	-0.00882423	0.0404863	0.0493105	0.443528
0	6	690	9	11.9181	23.8624	-0.0213206	0.0906628	0.111983	0.326629
0	6	691	9	12.9996	23.0624	0.034847	0.160955	0.126108	0.390318
0	6	692	9	12.5853	24.6567	-0.038566	0.0338117	0.0723776	0.467612
0	6	693	9	11.6745	23.8459	-0.0636206	0.16625	0.22987	0.565681
0	6	694	9	13.345	23.8707	-0.0212072	0.0767591	0.0979663	0.377849
0	6	695	9	11.8006	23.4932	-0.0416451	0.115682	0.157327	0.348424
0	6	696	9	13.4616	23.4215	-0.0443409	0.0850132	0.129354	0.344146
0	6	697	9	12.7395	23.9859	0.0148833	0.181896	0.167013	0.415367
0	6	698	9	12.3606	23.3323	-0.029831	0.158073	0.187904	0.418218
0	6	699	9	13.3301	23.4067	-0.0169386	0.167747	0.184685	0.442497
0	6	700	9	11.4936	24.7795	-0.0800079	0.112756	0.192764	0.434369
0	6	701	9	11.57	24.2865	-0.033406	0.198304	0.23171	0.388665
0	6	702	9	13.3073	23.4668	0.0501961	0.165083	0.114887	0.297603
0	6	703	9	11.6788	23.5778	-0.101483	0.189445	0.290928	0.700023
0	6	704	9	12.3957	23.7256	-0.0481585	0.0878539	0.136012	0.33297
0	6	705	9	12.7618	24.0915	-0.0805115	0.148626	0.229138	0.438698
0	6	706	9	12.5639	23.8647	-0.111701	0.130992	0.242693	0.795993
0	6	707	9	12.9193	24.7264	-0.0392529	0.207804	0.247057	0.370416
0	6	708	9	12.2628	24.4634	0.0216917	0.210848	0.189156	0.3717
0	6	709	9	12.6638	24.2375	-0.0599176	0.200408	0.260326	0.541883
0	6	710	9	12.5272	23.434	-0.0461095	0.207021	0.253131	0.564189
0	6	711	9	11.2933	23.6489	-0.0729552	0.220261	0.293216	0.471627
0	6	712	9	11.6901	23.9665	-0.0658982	0.0722914	0.13819	0.466091
0	6	713	9	11.5815	24.2365	-0.0543889	0.136854	0.191243	0.413763
0	6	714	9	12.6956	24.3351	-0.148909	0.119688	0.268597	0.536787
0	6	715	9	11.9676	24.6542	0.0542429	0.189735	0.135492	0.428181
0	6	716	9	12.6084	23.5413	-0.0958539	0.116549	0.212403	0.44619
0	6	717	9	11.5775	25.2178	0.0244173	0.277239	0.252821	0.494914
0	7	718	9	13.5833	24.0562	-0.158728	0.0991888	0.257917	0.503794
0	7	719	9	13.4076	24.6749	-0.0725428	0.256844	0.329386	0.382884
0	7	720	9	13.0817	24.473	0.204391	0.252178	0.0477869	0.0993759
0	7	721	9	13.5099	25.732	-0.0427944	0.188742	0.231536	0.495798
0	7	722	9	13.4893	25.2638	-0.137573	0.0295737	0.167146	0.423595
0	7	723	9	13.6864	25.4919	-0.0319127	0.137123	0.169036	0.366572
0	7	724	9	13.1605	25.2079	-0.103264	0.0596898	0.162953	0.396953
0	7	725	9	12.1471	24.1446	0.238895	0.155401	-0.0834939	0.224489
0	7	726	9	13.984	25.2205	-0.10546	0.0312244	0.136684	0.433436
0	7	727	9	14.2435	24.8405	-0.0843712	0.385747	0.470118	0.465262
0	7	728	9	13.8702	24.9907	-0.197183	0.111051	0.308234	0.422136
0	7	729	9	13.1711	23.6367	0.0099202	0.114419	0.104498	0.471059
0	7	730	9	13.1	24.7658	-0.113914	0.0269045	0.140818	0.473465
0	7	731	9	12.6621	23.9818	-0.10544	0.0451126	0.150553	0.410057
0	7	732	9	12.7206	25.7109	-0.0964758	0.106909	0.203385	0.644737
0	7	733	9	12.5382	25.6043	-0.0680884	0.0914285	0.159517	0.642101
0	7	734	9	12.1663	24.6243	-0.0606737	0.101901	0.162574	0.402968
0	7	735	9	12.2338	25.4042	0.303395	0.109427	-0.193968	0.193985
0	7	736	9	12.7684	25.5061	-0.0836745	0.17022	0.253894	0.553733
0	7	737	9	12.2556	25.3891	-0.0325412	0.107667	0.140209	0.658199
0	7	738	9	13.6252	24.3059	0.327658	0.20749	-0.120168	0.160862
0	7	739	9	13.119	24.3848	0.00664304	0.125798	0.119155	0.43531
0	7	740	9	13.4259	24.597	-0.0708716	0.145182	0.216054	0.459017
0	7	741	9	13.3099	24.4984	0.0570577	0.171551	0.114494	0.407421
0	7	742	9	13.0356	23.698	0.107157	0.16978	0.0626226	0.396589
0	7	743	9	14.1961	24.1773	-0.0559204	0.331838	0.387759	0.636911
0	7	744	9	11.7902	24.177	0.193082	0.119238	-0.0738436	0.210792
0	7	745	9	12.9774	24.7612	0.0344304	0.353183	0.318753	0.48203
0	7	746	9	12.0284	23.9266	0.220464	0.307362	0.0868985	0.343697
0	7	747	9	13.4636	25.1995	0.0174824	0.148112	0.13063	0.514682
0	7	748	9	13.5813	25.6652	-0.00467735	0.288579	0.293257	0.823926
0	7	749	9	12.8708	25.7154	-0.0643543	0.167464	0.231819	0.630475
0	7	750	9	13.8052	25.0378	0.112965	0.280508	0.167543	0.363445
0	7	751	9	13.5936	25.6725	-0.0244008	0.16928	0.193681	0.607024
0	7	752	9	13.3101	23.5935	-0.137642	0.178135	0.315777	0.699549
0	7	753	9	13.3018	25.0054	0.108162	0.184966	0.0768041	0.443594
0	7	754	9	14.1084	25.9691	-0.185778	0.195676	0.381453	0.697393
0	7	755	9	13.9831	25.1208	-0.094833	0.224021	0.318854	0.457539
0	7	756	9	13.9581	23.8338	-0.0397372	0.179503	0.21924	0.345781
0	7	757	9	13.1684	24.9631	-0.164344	0.430568	0.594913	0.56333
0	7	758	9	12.965	24.0149	-0.134264	0.326405	0.46067	0.786367
0	7	759	9	13.2472	24.3102	0.0148388	0.199257	0.184418	0.447247
0	7	760	9	12.9875	25.1394	-0.0554391	0.246573	0.302012	0.514913
0	7	761	9	13.9809	24.5896	0.0222986	0.366736	0.344437	0.470358
0	7	762	9	13.5534	24.8363	0.026412	0.158223	0.131811	0.337221
0	7	763	9	13.9555	24.2068	0.103039	0.122798	0.0197587	0.143311
0	7	764	9	13.6332	24.0496	0.186696	0.131601	-0.0550951	0.256565
0	7	765	9	12.9898	23.9396	-0.100345	0.184312	0.284657	0.550977
0	7	766	9	13.7916	24.2874	0.0324586	0.199278	0.16682	0.38855
0	7	767	9	13.047	23.7429	0.0133821	0.185045	0.171663	0.277565
0	7	768	9	13.4348	23.8097	0.0918445	0.284021	0.192176	0.313904
0	7	769	9	12.8477	24.8569	-0.0666347	0.207812	0.274446	0.43142
0	7	770	9	13.7171	25.3388	0.0601718	0.259771	0.199599	0.365456
0	7	771	9	13.6605	24.1175	0.211201	0.260572	0.049371	0.153702
0	7	772	9	13.5042	25.1284	0.164167	0.285457	0.12129	0.203144
0	7	773	9	13.64	25.1206	-0.11719	0.457613	0.574803	0.693161
0	7	774	9	13.2614	23.4834	-0.162217	0.121235	0.283451	0.519587
0	7	775	9	14.1305	23.7246	0.0442494	0.178613	0.134364	0.537224
0	7	776	9	12.6203	24.5044	-0.0528861	0.1838	0.236686	0.583173
0	7	777	9	13.4541	24.1636	-0.0325163	0.136425	0.168941	0.369374
0	7	778	9	13.2863	23.6337	-0.0359848	0.140224	0.176209	0.584449
0	7	779	9	12.7717	24.1512	-0.0172992	0.339764	0.357063	0.612678
0	7	780	9	12.5278	24.9817	-0.218955	0.29371	0.512665	0.739834
0	7	781	9	13.4065	25.3368	-0.0436731	0.195653	0.239327	0.611035
0	7	782	9	13.6904	23.9625	-0.0678305	0.206786	0.274617	0.454863
0	7	783	9	13.1195	24.3833	-0.0254676	0.269051	0.294519	0.598886
0	7	784	9	12.6899	25.0463	0.213887	0.218509	0.00462139	0.101211
0	7	785	9	12.7591	25.0975	0.313886	-0.130553	-0.444439	-0.609411
0	7	786	9	13.886	24.72	0.0276625	0.18152	0.153858	0.457677
0	8	787	9	11.7435	23.7465	-0.131208	0.00742433	0.138633	0.307975
0	8	788	9	12.0487	23.9489	0.010221	0.0550526	0.0448315	0.123814
0	8	789	9	10.7833	22.7868	-0.110255	0.169449	0.279704	0.42677
0	8	790	9	12.9638	23.2032	-0.111921	0.0999756	0.211897	0.406565
0	8	791	9	11.9452	22.7552	-0.146887	0.0575145	0.204402	0.415515
0	8	792	9	11.3421	22.8839	-0.123994	0.0838179	0.207812	0.413426
0	8	793	9	12.8414	22.7171	-0.0590545	0.212188	0.271243	0.523706
0	8	794	9	11.8958	23.5355	-0.065434	0.227284	0.292718	0.47387
0	8	795	9	10.9076	22.7767	-0.0588084	0.0195399	0.0783483	0.295896
0	8	796	9	11.7012	22.4821	-0.0198242	0.14514	0.164964	0.334358
0	8	797	9	12.9391	23.9497	-0.082923	0.0420848	0.125008	0.338843
0	8	798	9	11.7024	22.6631	-0.0952057	0.165065	0.260271	0.304758
0	8	799	9	12.0111	23.0144	-0.0692582	0.0878801	0.157138	0.31875
0	8	800	9	12.3008	23.8411	-0.157512	0.159035	0.316547	0.384159
0	8	801	9	11.3466	22.6739	-0.0204283	0.108057	0.128486	0.267817
0	8	802	9	11.857	23.7385	0.0672629	0.342803	0.27554	0.394207
0	8	803	9	11.5738	23.3199	0.0388621	0.153418	0.114556	0.299088
0	8	804	9	11.9558	23.4374	-0.0257152	0.152985	0.1787	0.25048
0	8	805	9	11.3527	22.9216	-0.0100222	0.108497	0.118519	0.359934
0	8	806	9	11.5366	23.4527	0.0420117	0.133151	0.0911396	0.342471
0	8	807	9	12.5766	24.0369	0.0134595	0.179827	0.166368	0.369249
0	8	808	9	12.6162	23.0432	-0.023082	0.136703	0.159785	0.316329
0	8	809	9	12.2158	24.5112	0.143841	0.216991	0.07315	0.302733
0	8	810	9	11.8526	23.0401	-0.0556092	0.116359	0.171968	0.474522
0	8	811	9	11.7934	23.2409	0.121007	0.533198	0.412191	0.373285
0	8	812	9	12.4914	23.8121	-0.0136707	0.235856	0.249527	0.46313
0	8	813	9	12.8438	23.7136	-0.0564882	0.162754	0.219242	0.580262
0	8	814	9	11.2112	24.026	0.0276336	0.211641	0.184007	0.479175
0	8	815	9	11.9468	24.7177	-0.0886039	0.098797	0.187401	0.365065
0	8	816	9	11.1555	23.1047	0.141427	0.203141	0.0617138	0.221043
0	8	817	9	11.9165	23.0456	0.0208598	0.2495	0.22864	0.349401
0	8	818	9	12.6871	23.1636	-0.0667322	0.103291	0.170023	0.470896
0	8	819	9	11.7144	22.6236	0.00879725	0.138064	0.129267	0.410373
0	8	820	9	11.9324	23.2077	-0.173806	0.250777	0.424583	0.603963
0	8	821	9	11.8263	22.6898	-0.00726581	0.0750801	0.0823459	0.426744
0	8	822	9	11.689	23.2221	-0.0775411	0.167898	0.245439	0.417871
0	8	823	9	12.3108	22.7971	0.0357905	0.13954	0.103749	0.270282
0	8	824	9	12.0174	22.79	-0.0697365	0.121943	0.191679	0.358791
0	8	825	9	11.8106	23.5726	-0.0861806	0.207835	0.294016	0.406047
0	8	826	9	11.9131	23.1916	0.0873572	0.197624	0.110267	0.409531
0	8	827	9	12.0716	23.0157	0.0119552	0.178486	0.166531	0.324651
0	8	828	9	12.0051	23.9849	0.216856	0.193559	-0.0232976	0.229336
0	8	829	9	11.6393	24.8499	0.062636	0.154819	0.0921831	0.180006
0	8	830	9	11.5723	23.279	0.039309	0.127361	0.0880524	0.20207
0	8	831	9	11.4147	23.2949	0.05636	0.103671	0.0473109	0.145889
0	8	832	9	11.9041	23.1521	-0.0698171	0.108679	0.178496	0.324209
0	8	833	9	12.9874	23.3439	-0.0219374	0.278788	0.300725	0.373992
0	8	834	9	11.1968	23.4808	-0.0150078	0.166331	0.181338	0.376376
0	8	835	9	12.0576	23.2233	-0.0163524	0.0987168	0.115069	0.255176
0	8	836	9	11.886	23.3362	-0.0713874	0.147444	0.218831	0.377502
0	8	837	9	12.5664	23.2959	0.0310359	0.112779	0.0817435	0.272507
0	8	838	9	12.0548	22.7562	-0.0525018	0.107536	0.160038	0.431577
0	8	839	9	12.0595	22.9306	-0.117047	0.101609	0.218656	0.468815
0	8	840	9	12.4316	23.5711	-0.0150684	0.104825	0.119894	0.325841
0	8	841	9	12.981	23.963	0.0862498	0.172386	0.0861363	0.345403
0	8	842	9	12.0341	23.6222	0.0127612	0.184676	0.171915	0.26427
0	8	843	9	11.0058	23.5019	-0.0407728	0.134218	0.174991	0.2521
0	8	844	9	11.8549	23.899	-0.0576957	0.0954803	0.153176	0.35975
0	8	845	9	12.1021	23.1262	-0.0766332	0.119962	0.196595	0.348141
0	8	846	9	11.2471	22.7254	-0.0487409	0.154494	0.203235	0.383692
0	8	847	9	11.6225	23.9281	0.0598889	0.119761	0.0598722	0.316696
0	8	848	9	11.8921	23.7517	-0.0280759	0.051411	0.079487	0.281081
0	8	849	9	12.0183	24.2509	-0.0374459	0.135248	0.172693	0.28646
0	8	850	9	12.2676	23.4606	-0.0112713	0.113765	0.125036	0.362676
0	8	851	9	11.38	22.9755	-0.0424203	0.216484	0.258905	0.316683
0	8	852	9	10.8809	23.7209	0.0281129	0.32338	0.295268	0.535814
0	8	853	9	11.6906	22.6332	0.0765294	0.240479	0.163949	0.468666
0	8	854	9	11.8827	22.514	0.0565377	0.183574	0.127037	0.290881
0	8	855	9	12.5632	23.4705	0.195025	0.229123	0.0340986	0.18034
0	8	856	9	11.4418	23.3015	-0.00302242	0.177991	0.181013	0.239597
0	8	857	9	11.7797	22.7635	-0.0176228	0.0788858	0.0965086	0.271771
0	8	858	9	12.2881	23.4264	0.122287	0.135847	0.0135592	0.257019
0	8	859	9	11.4825	23.0371	-0.00302179	0.164646	0.167668	0.352235
0	8	860	9	12.4145	23.3996	0.0619046	0.191774	0.129869	0.397963
0	8	861	9	11.7212	23.6159	0.00943948	0.329352	0.319912	0.565815
0	8	862	9	12.0006	23.0026	0.0621828	0.150015	0.0878327	0.388906
0	8	863	9	10.8378	23.2718	-0.0697896	0.0962038	0.165993	0.294957
0	8	864	9	11.1459	24.3094	0.0854403	0.149263	0.0638225	0.366199
0	8	865	9	11.5577	22.6517	0.0282095	0.198849	0.17064	0.469703
0	8	866	9	11.8719	22.8737	0.00144491	0.294958	0.293513	0.547646
0	8	867	9	12.1866	24.6007	0.0901597	0.299365	0.209206	0.391071
0	8	868	9	11.8073	22.9757	-0.0865156	0.0553946	0.14191	0.37201
0	8	869	9	11.3149	23.893	0.0378959	0.123515	0.0856189	0.284052
0	8	870	9	11.6448	22.7124	0.021019	0.143283	0.122264	0.273196
0	8	871	9	12.0309	24.4548	-0.00481135	0.283101	0.287912	0.397892
0	8	872	9	12.3959	24.5469	0.116244	0.397918	0.281673	0.435789
0	8	873	9	13.0716	23.1448	-0.0718338	0.0781051	0.149939	0.300067
0	8	874	9	12.3401	24.2206	-0.0842551	0.161711	0.245966	0.422717
0	8	875	9	11.6419	22.758	-0.0668439	0.191054	0.257898	0.53782
0	8	876	9	11.6549	24.0948	-0.0661109	0.1471	0.213211	0.491753
0	8	877	9	11.8556	23.7181	0.116602	0.0944122	-0.0221901	0.307577
0	8	878	9	12.0992	22.9672	0.000883988	0.171908	0.171024	0.282076
0	8	879	9	12.5564	23.2355	0.113955	0.237655	0.1237	0.43871
0	8	880	9	11.1999	23.7123	-0.118511	0.255515	0.374026	0.609229
0	8	881	9	11.9094	22.9878	-0.0482178	0.109926	0.158144	0.253945
0	8	882	9	12.7546	23.0608	-0.0569046	0.0808566	0.137761	0.401856
0	8	883	9	13.0406	23.1591	0.038187	0.118374	0.0801871	0.333726
0	8	884	9	12.2959	23.3915	0.0710959	0.203583	0.132487	0.392084
0	8	885	9	11.6238	23.0527	0.0216551	0.223028	0.201372	0.312532
0	8	886	9	12.276	23.909	-0.0963145	0.115952	0.212266	0.374261
0	8	887	9	11.4771	24.6463	0.0606223	0.224139	0.163517	0.294423
0	8	888	9	11.701	24.3059	0.0246797	0.214718	0.190038	0.291238
0	8	889	9	11.8878	24.5456	0.149834	0.387411	0.237577	0.338541
0	8	890	9	11.1727	23.8866	-0.00526533	0.198995	0.204261	0.35351
0	8	891	9	11.649	23.3497	-0.0366733	0.118092	0.154765	0.40999
0	8	892	9	12.153	23.2528	-0.0317507	0.143589	0.175339	0.347197
0	8	893	9	12.7453	22.975	0.158988	0.140138	-0.01885	0.23978
0	8	894	9	10.8241	24.4677	0.071723	0.128894	0.057171	0.181334
0	8	895	9	12.0414	23.6434	-0.112386	0.0920397	0.204426	0.378834
0	8	896	9	12.5531	22.6016	-0.0299798	0.104941	0.134921	0.438283
0	8	897	9	11.4775	24.5207	-0.0193404	0.158481	0.177822	0.205768
0	8	898	9	11.6004	22.8312	0.164623	0.181514	0.0168911	0.149408
0	8	899	9	12.0036	23.425	-0.0724271	0.120178	0.192605	0.359485
0	8	900	9	11.2767	22.9823	-0.0601469	0.173453	0.2336	0.350157
0	8	901	9	12.4718	24.0987	-0.0339692	0.147017	0.180986	0.273304
0	8	902	9	12.2287	23.781	-0.00848162	0.151803	0.160285	0.304083
0	8	903	9	11.6444	23.0382	0.0397889	0.248277	0.208488	0.418568
0	8	904	9	11.9236	24.0933	-0.0489006	0.180213	0.229113	0.389817
0	8	905	9	11.8546	24.4222	-0.0555716	0.198568	0.25414	0.543328
0	8	906	9	11.4667	23.5462	-0.0306828	0.219494	0.250177	0.705034
0	8	907	9	11.9355	23.8055	-0.0183556	0.0730613	0.0914169	0.266243
0	8	908	9	11.8653	23.6554	0.152707	0.245756	0.0930498	0.331059
0	8	909	9	12.0371	23.1842	-0.0155771	0.0923926	0.10797	0.38862
0	8	910	9	11.6768	22.7604	0.00836722	0.0756174	0.0672502	0.251931
0	8	911	9	10.7296	22.8924	0.00687255	0.114427	0.107554	0.459716
0	8	912	9	13.0684	24.6837	-0.0283357	0.218977	0.247313	0.533483
0	8	913	9	12.1366	23.0564	-0.0519815	0.117741	0.169723	0.393458
0	8	914	9	12.3658	23.1133	-0.0266824	0.25172	0.278402	0.595234
0	8	915	9	12.0913	24.0958	-0.0156632	0.330522	0.346185	0.472873
0	8	916	9	11.3241	23.1555	-0.0911546	0.0868086	0.177963	0.342838
0	8	917	9	12.0091	23.953	0.0823452	0.084471	0.00212586	0.215979
0	8	918	9	12.8375	23.3711	0.00215415	0.108359	0.106205	0.33367
0	8	919	9	11.32	24.7373	0.0442202	0.171503	0.127283	0.321311
0	8	920	9	11.9065	24.1188	-0.0183108	0.193676	0.211987	0.466088
0	8	921	9	11.1792	24.9026	-0.079796	0.208206	0.288002	0.310658
0	8	922	9	12.2066	24.002	0.0273642	0.17875	0.151386	0.315249
0	8	923	9	11.9124	23.3706	0.121482	0.167985	0.0465032	0.134649
0	8	924	9	12.2297	24.4223	0.0389997	0.156689	0.117689	0.289249
0	8	925	9	11.9622	22.8322	-0.0401478	0.104957	0.145105	0.411211
0	8	926	9	12.0174	23.1099	0.103259	0.0497313	-0.0535275	0.272463
0	8	927	9	12.0271	23.515	0.0512212	0.159614	0.108393	0.288241
0	8	928	9	12.7456	23.6156	0.112851	0.21858	0.105729	0.37499
0	8	929	9	11.0828	23.1001	0.138771	0.105779	-0.0329917	0.203633
0	8	930	9	11.6508	23.4472	0.0915114	0.133626	0.0421144	0.282031
0	8	931	9	11.3431	24.1243	0.0690691	0.113086	0.0440173	0.236397
0	8	932	9	11.4397	23.3205	0.016423	0.0974666	0.0810436	0.295158
0	8	933	9	11.5518	23.8281	-0.050831	0.138516	0.189347	0.407735
0	8	934	9	11.922	23.5804	-0.0972232	0.221432	0.318655	0.501327
0	8	935	9	12.3448	24.2102	0.0697392	0.108035	0.0382962	0.328315
0	8	936	9	11.0856	23.4895	-0.107809	0.194694	0.302502	0.443375
0	8	937	9	11.0717	23.6313	0.0164539	0.106216	0.0897623	0.465525
0	8	938	9	12.0938	22.827	0.125819	0.197164	0.0713445	0.208179
0	8	939	9	11.9061	22.6003	-0.0168774	0.0904598	0.107337	0.341405
0	8	940	9	12.3107	24.2387	-0.212345	0.218925	0.431269	0.877283
0	8	941	9	12.4399	22.9377	0.0774607	0.116444	0.0389837	0.264348
0	8	942	9	12.016	23.0643	-0.0799398	0.0958977	0.175838	0.312966
0	8	943	9	12.6432	24.3038	0.0597281	0.0488252	-0.0109029	0.320404
0	8	944	9	10.8771	24.3008	0.0852918	0.298097	0.212805	0.354847
0	8	945	9	11.1307	24.1249	-0.0436207	0.22936	0.272981	0.350137
0	8	946	9	12.2022	24.9323	-0.0416695	0.181345	0.223014	0.462101
0	8	947	9	11.6056	23.9099	0.0120629	0.250694	0.238631	0.39806
0	8	948	9	12.1913	23.3071	0.12366	0.237571	0.113911	0.343129
0	8	949	9	10.8941	23.5906	0.00264462	0.122611	0.119966	0.373548
0	8	950	9	11.9504	22.9869	-0.0567701	0.274375	0.331145	0.403813
0	8	951	9	11.484	23.0154	-0.0827333	0.172587	0.25532	0.52207
0	8	952	9	11.8511	24.9208	0.172961	0.332924	0.159962	0.327171
0	8	953	9	12.8022	23.4019	-0.0140553	0.303184	0.317239	0.366286
0	8	954	9	10.916	23.4419	0.00746547	0.116403	0.108938	0.282296
0	8	955	9	11.6593	23.4025	-0.0545319	0.20492	0.259452	0.379221
0	8	956	9	12.5463	23.1594	0.11571	0.132115	0.016405	0.138887
0	8	957	9	12.8174	22.6572	0.0277305	0.321324	0.293593	0.44236
0	8	958	9	12.2117	25.0343	0.0806226	0.19771	0.117088	0.294454
0	8	959	9	12.7462	23.6171	-0.0403413	0.0811187	0.12146	0.334025
0	8	960	9	12.7151	24.0685	-0.052177	0.14742	0.199597	0.437267
0	9	961	9	13.2585	24.4889	-0.193903	0.15872	0.352623	0.40096
0	9	962	9	13.3027	24.2679	0.0169746	0.104725	0.0877505	0.226139
0	9	963	9	11.9941	23.5572	-0.31598	-0.050566	0.265414	0.503973
0	9	964	9	12.259	24.2659	-0.0844481	0.259134	0.343582	0.369771
0	9	965	9	13.5486	24.5484	-0.212758	-0.0590666	0.153691	0.163713
0	9	966	9	11.9801	24.3074	0.157938	0.296362	0.138424	0.287221
0	9	967	9	12.9609	23.7113	-0.321816	-0.146028	0.175789	0.397391
0	9	968	9	12.2434	24.8063	-0.269342	0.0751263	0.344468	0.344896
0	9	969	9	12.6861	23.6035	-0.350995	-0.0016701	0.349325	0.473167
0	9	970	9	11.4545	24.0828	-0.22579	-0.0293932	0.196397	0.351932
0	9	971	9	13.0371	24.2053	-0.0496205	0.0195535	0.069174	0.294389
0	9	972	9	12.3799	24.2972	-0.202904	0.0663128	0.269217	0.437227
0	9	973	9	12.6057	24.8724	-0.299914	0.0402622	0.340176	0.500793
0	9	974	9	12.9679	24.4819	-0.235515	0.0668793	0.302395	0.377378
0	9	975	9	13.425	23.9694	0.0404796	0.585511	0.545031	0.398772
0	9	976	9	12.7571	25.4833	0.0342649	0.192084	0.157819	0.32954
0	9	977	9	12.6421	23.5046	-0.338452	0.0741037	0.412556	0.632695
0	9	978	9	12.8077	25.3332	-0.0254331	0.190437	0.21587	0.427067
0	9	979	9	11.2716	24.2861	-0.101931	0.04377	0.145701	0.373913
0	9	980	9	11.6162	24.0882	-0.191105	0.165109	0.356213	0.359771
0	9	981	9	12.9627	24.0076	-0.126843	-0.289577	-0.162734	0.296384
0	9	982	9	12.8698	24.01	-0.245317	0.0801941	0.325511	0.474943
0	9	983	9	11.8752	23.8727	-0.255878	-0.0506622	0.205216	0.461471
0	9	984	9	11.6195	23.4701	-0.00363123	0.0629719	0.0666032	0.273222
0	9	985	9	11.4697	24.0519	-0.139591	0.140747	0.280338	0.475422
0	9	986	9	11.9352	24.7618	-0.125019	0.173087	0.298106	0.484758
0	9	987	9	12.9479	23.9842	-0.0554755	0.129908	0.185384	0.437141
0	9	988	9	11.5031	24.556	-0.0289766	0.272108	0.301085	0.420456
0	9	989	9	12.5948	23.5616	0.201004	0.245178	0.044174	0.374228
0	9	990	9	12.6399	24.4441	0.0855834	0.385744	0.300161	0.307432
0	9	991	9	13.7411	23.5864	0.0961757	0.473292	0.377117	0.343956
0	9	992	9	11.2063	25.3405	0.0353581	0.134474	0.0991159	0.249458
0	9	993	9	12.1914	24.7668	0.0913006	0.314826	0.223525	0.368521
0	9	994	9	12.0181	23.8395	-0.13394	0.119593	0.253534	0.73735
0	9	995	9	12.2125	24.1208	0.0644038	0.191539	0.127136	0.268224
0	9	996	9	12.6269	24.8303	-0.149546	0.217323	0.366868	0.442327
0	9	997	9	11.6476	24.407	0.107545	0.175703	0.0681579	0.21134
0	9	998	9	12.6334	23.7785	0.000235631	0.0596878	0.0594521	0.266864
0	9	999	9	12.7269	23.4398	-0.0432735	0.315724	0.358997	0.420097
0	9	1000	9	13.6917	23.8826	-0.256324	0.042268	0.298592	0.459662
0	9	1001	9	12.8549	23.4861	0.0537149	0.17187	0.118155	0.175704
0	9	1002	9	12.8547	23.974	-0.137043	0.111718	0.248761	0.387711
0	9	1003	9	11.236	24.4775	-0.0899843	0.131283	0.221267	0.434087
0	9	1004	9	11.8201	24.1468	-0.0450458	0.0582	0.103246	0.363781
0	9	1005	9	12.6449	23.587	-0.0688045	0.160284	0.229088	0.428004
0	9	1006	9	11.8605	23.0528	-0.21242	0.0931435	0.305564	0.438271
0	9	1007	9	13.0114	24.0926	0.238428	0.293916	0.0554882	0.170833
0	9	1008	9	12.8917	24.502	0.0307551	0.282029	0.251274	0.303714
0	9	1009	9	13.091	25.1658	0.0765961	0.331333	0.254737	0.493696
0	9	1010	9	12.5361	24.7264	0.0838064	0.156416	0.0726095	0.233171
0	9	1011	9	12.0158	25.3021	0.0123194	-0.00880159	-0.021121	0.344489
0	9	1012	9	12.974	24.4553	0.3082	0.184184	-0.124016	-0.121338
0	9	1013	9	13.6676	23.8851	0.0755966	0.199041	0.123444	0.269166
0	9	1014	9	11.1363	25.3064	0.161891	0.172995	0.0111042	0.159106
0	9	1015	9	12.7288	23.4199	-0.0226136	0.138837	0.161451	0.356999
0	9	1016	9	12.6163	24.3672	0.120796	0.180415	0.0596196	0.143382
0	9	1017	9	12.6705	23.087	-0.0486741	-0.0183324	0.0303417	0.396265
0	9	1018	9	12.0667	24.0113	0.0223171	0.252767	0.23045	0.228675
0	9	1019	9	12.0179	23.4877	-0.056458	0.199594	0.256052	0.465086
0	9	1020	9	12.8725	25.4087	0.0825272	0.349549	0.267022	0.484735
0	9	1021	9	11.9891	24.9607	-0.1267	0.169577	0.296277	0.405622
0	9	1022	9	11.7222	24.1798	-0.167707	0.11647	0.284177	0.38084
0	9	1023	9	12.8893	23.4384	-0.18323	0.178984	0.362214	0.524941
0	9	1024	9	11.519	23.6369	-0.0797133	0.187704	0.267417	0.30909
0	9	1025	9	12.8782	24.171	-0.0203916	0.0931863	0.113578	0.377246
0	9	1026	9	12.3125	23.4367	-0.154603	-0.0133392	0.141263	0.480984
0	9	1027	9	13.3	24.9644	0.0600441	0.0888805	0.0288365	0.223473
0	9	1028	9	13.377	25.0095	-0.142212	0.0461581	0.18837	0.55502
0	9	1029	9	12.2505	24.6932	-0.0340358	0.211341	0.245377	0.280979
0	9	1030	9	11.1905	25.1567	-0.0812527	0.239852	0.321105	0.436242
0	9	1031	9	12.5101	23.2615	0.157027	0.0859627	-0.0710643	0.121464
0	9	1032	9	13.2203	24.2913	0.0412204	0.167057	0.125836	0.130389
0	9	1033	9	12.3548	24.9504	0.0544406	0.116247	0.0618065	0.234197
0	9	1034	9	11.8465	24.6597	0.175034	0.100667	-0.0743668	0.420637
0	9	1035	9	11.9455	23.9367	0.00493347	0.247514	0.24258	0.464795
0	9	1036	9	12.5798	24.7379	0.212802	0.0902786	-0.122523	0.186079
0	9	1037	9	11.3803	25.0503	0.110091	0.30199	0.191899	0.361599
0	9	1038	9	11.9221	24.2159	0.152627	0.308574	0.155947	0.334571
0	9	1039	9	12.49	24.4961	-0.110605	0.194637	0.305242	0.495723
0	9	1040	9	12.4764	24.1015	0.145035	0.0960378	-0.048997	0.423317
0	9	1041	9	12.5836	23.8086	0.0786049	0.177163	0.0985583	0.548354
0	9	1042	9	11.8561	24.2466	-0.0516957	0.284575	0.336271	0.487184
0	9	1043	9	12.2652	24.2171	-0.089758	0.215226	0.304984	0.602984
0	9	1044	9	12.8116	24.932	0.246586	0.341109	0.0945225	0.192006
0	9	1045	9	11.857	24.3554	-0.101668	0.30108	0.402748	0.639318
0	9	1046	9	12.1761	23.894	-0.190756	0.0762913	0.267048	0.632527
0	9	1047	9	12.4712	23.8933	0.0830657	0.290538	0.207472	0.271259
0	9	1048	9	11.7435	24.322	-0.0226074	0.35551	0.378118	0.442924
0	9	1049	9	12.4992	23.8774	-0.147652	0.209023	0.356675	0.735158
0	9	1050	9	12.1157	24.2224	-0.157945	0.231675	0.38962	0.67301
0	9	1051	9	11.3933	24.0679	0.00607903	0.273356	0.267277	0.37113
0	9	1052	9	12.901	24.8265	-0.0857584	0.151584	0.237343	0.737972
0	9	1053	9	13.0262	24.8383	0.158076	0.308449	0.150373	0.16781
0	9	1054	9	11.9724	24.693	0.102925	0.294021	0.191096	0.376151
0	9	1055	9	13.0243	24.4018	0.223391	0.434537	0.211146	0.292218
0	9	1056	9	12.0728	24.3726	-0.137398	0.368544	0.505942	0.425483
0	9	1057	9	11.7166	24.1448	0.129028	0.238247	0.10922	0.334464
0	9	1058	9	11.1397	23.5876	0.104817	0.262432	0.157615	0.364954
0	9	1059	9	13.0642	24.7881	-0.0910997	0.262867	0.353967	0.515435
0	9	1060	9	13.0371	24.1728	0.289435	0.429872	0.140437	0.240898
0	9	1061	9	12.4022	23.4564	0.0325612	0.214495	0.181934	0.358118
0	9	1062	9	12.3044	23.1096	0.269858	0.399038	0.12918	0.312126
0	9	1063	9	11.9639	24.4217	0.221638	0.410539	0.188902	0.2009
0	9	1064	9	12.3721	24.2997	-0.0555317	0.199765	0.255297	0.408112
0	9	1065	9	13.4434	24.7033	0.0191814	0.216779	0.197598	0.364707
0	9	1066	9	12.8775	25.2069	0.298727	0.488758	0.19003	0.603434
0	9	1067	9	12.5663	25.3748	0.104912	0.31008	0.205168	0.336277
0	9	1068	9	12.1171	24.3907	0.187772	0.281148	0.0933755	0.231013
0	9	1069	9	12.5721	25.425	0.536295	0.602655	0.0663595	0.220026
0	9	1070	9	12.887	24.0532	0.029483	0.50171	0.472227	0.445863
0	9	1071	9	11.6829	24.6241	0.0497333	0.383405	0.333672	0.657446
0	9	1072	9	12.3126	24.84	-0.131007	0.190741	0.321748	0.527739
0	9	1073	9	12.5171	24.4026	-0.0544817	0.368268	0.422749	0.416851
0	9	1074	9	13.0472	24.4487	0.058867	0.280357	0.22149	0.46522
0	9	1075	9	13.0996	24.0682	0.121467	0.257057	0.13559	0.228975
0	9	1076	9	11.5537	24.842	-0.0340831	0.250584	0.284667	0.31051
0	9	1077	9	11.5316	24.0292	0.0648642	0.319234	0.25437	0.29757
0	9	1078	9	12.9652	24.511	0.17521	0.28405	0.10884	0.20888
0	9	1079	9	12.0539	23.3891	0.149558	0.130115	-0.0194433	0.222874
0	9	1080	9	12.9285	24.1706	0.0568646	0.241764	0.184899	0.243042
0	9	1081	9	13.0458	24.3425	0.0793983	0.54817	0.468772	0.523227
0	9	1082	9	12.9072	23.7899	-0.115109	0.165229	0.280338	0.404283
0	9	1083	9	12.0539	24.9639	0.0183567	0.194865	0.176508	0.396683
0	9	1084	9	11.6349	24.1274	-0.196073	-0.0286405	0.167432	0.520122
0	9	1085	9	11.27	24.8179	-0.0122788	0.140439	0.152718	0.297421
0	9	1086	9	12.3095	23.6504	0.281546	0.255944	-0.0256025	0.221078
0	9	1087	9	12.3871	24.0836	-0.0670058	0.196127	0.263132	0.292791
0	9	1088	9	13.0234	24.4675	-0.0369031	0.403858	0.440761	0.497033
0	9	1089	9	11.7061	23.7578	0.143529	0.30378	0.160251	0.225998
0	9	1090	9	12.5057	23.5618	-0.0654624	0.149223	0.214686	0.258587
0	9	1091	9	13.3551	24.7471	0.0313151	0.305462	0.274147	0.247802
0	9	1092	9	11.8884	23.634	0.0223637	0.227973	0.205609	0.50772
0	9	1093	9	12.6967	23.9794	-0.130465	0.165807	0.296273	0.666667
0	9	1094	9	13.158	24.2169	0.184828	0.27893	0.0941019	0.32396
0	9	1095	9	12.0238	23.7598	-0.102398	0.0955089	0.197907	0.287025
0	9	1096	9	12.1557	23.3946	0.013566	0.209039	0.195473	0.415157
0	9	1097	9	12.6477	24.0927	0.0580986	0.1046	0.0465016	0.373849
0	9	1098	9	12.0731	23.7486	0.0668502	0.11721	0.0503596	0.389343
0	9	1099	9	11.8035	23.64	0.265879	0.316789	0.0509097	0.316828
0	9	1100	9	12.6553	24.0641	0.0316267	0.372727	0.341101	0.406601
0	9	1101	9	11.7533	24.4001	-0.191102	0.107242	0.298344	0.647833
0	9	1102	9	12.2971	23.9059	0.0493503	0.160708	0.111358	0.469161
0	9	1103	9	12.7299	24.5641	0.120378	0.415229	0.294851	0.501874
0	9	1104	9	11.6704	24.662	-0.0573591	0.438896	0.496255	0.331965
0	9	1105	9	12.1172	24.4704	0.0921947	0.609898	0.517703	0.393558
0	9	1106	9	12.9711	24.9193	-0.110232	0.173077	0.283309	0.490314
0	9	1107	9	12.5542	23.3167	-0.0987682	0.163937	0.262705	0.403694
0	9	1108	9	13.2055	24.6082	0.0294322	0.409519	0.380087	0.385373
0	9	1109	9	11.3046	23.575	0.144597	0.29356	0.148963	0.474769
0	9	1110	9	11.9884	25.6295	0.10144	0.40944	0.308	0.452595
0	9	1111	9	12.4864	23.4392	-0.0106038	0.35151	0.362114	0.416264
0	9	1112	9	12.0747	23.4858	0.241638	0.363047	0.121408	0.200111
0	9	1113	9	13.0062	23.6032	0.0404544	0.149082	0.108628	0.192086
0	9	1114	9	11.8733	23.2181	-0.0424165	0.0896202	0.132037	0.38436
0	9	1115	9	13.1049	23.4192	0.185754	0.249484	0.0637304	0.227981
0	9	1116	9	11.6623	24.2337	-0.182979	0.269825	0.452804	0.576463
0	9	1117	9	12.4762	23.9567	0.019128	0.364624	0.345496	0.492459
0	9	1118	9	12.8125	23.7742	-0.0617779	0.37237	0.434148	0.650365
0	9	1119	9	12.8933	25.5263	0.119509	0.260601	0.141093	0.119071
0	9	1120	9	12.9255	24.2529	0.0648069	0.217873	0.153066	0.296698
0	9	1121	9	11.8701	24.2118	-0.0218897	0.25381	0.275699	0.754509
0	9	1122	9	12.7381	23.9891	0.102978	0.313133	0.210155	0.376741
0	10	1123	9	12.0973	23.2539	-0.170079	0.12463	0.294709	0.416081
0	10	1124	9	12.7069	24.0707	-0.158812	0.170582	0.329394	0.496346
0	10	1125	9	12.7205	23.3142	-0.18777	0.171371	0.359141	0.552695
0	10	1126	9	13.0669	23.9171	-0.213156	0.133827	0.346983	0.476101
0	10	1127	9	12.3103	23.0271	-0.209674	0.169557	0.379231	0.567534
0	10	1128	9	13.5308	23.832	-0.20726	0.153239	0.360498	0.572474
0	10	1129	9	11.8078	23.6936	0.035386	0.0867345	0.0513485	0.203818
0	10	1130	9	13.3631	23.7767	-0.223892	0.2202	0.444092	0.648326
0	10	1131	9	12.8306	24.0832	-0.208244	0.0833426	0.291586	0.635135
0	10	1132	9	11.9231	25.103	0.263688	0.455949	0.192261	0.506475
0	10	1133	9	12.502	23.6128	-0.227776	0.15106	0.378836	0.70151
0	10	1134	9	12.6327	23.691	-0.219593	0.2181	0.437693	0.6025
0	10	1135	9	12.7684	23.6641	-0.137294	0.249249	0.386543	0.477965
0	10	1136	9	12.6916	23.4928	-0.134682	0.327319	0.462001	0.677816
0	10	1137	9	11.63	23.1155	-0.284591	0.0994854	0.384077	0.709032
0	10	1138	9	12.622	23.7531	-0.130756	0.127276	0.258032	0.579018
0	10	1139	9	13.4886	24.2264	-0.160048	0.217719	0.377768	0.506212
0	10	1140	9	12.5882	24.2914	-0.241815	0.106994	0.348809	0.664534
0	10	1141	9	11.6353	23.4686	-0.286149	0.168788	0.454937	0.742758
0	10	1142	9	12.08	23.3785	-0.0608434	0.195617	0.25646	0.617737
0	10	1143	9	12.3647	23.3757	-0.318639	0.316444	0.635084	0.841911
0	10	1144	9	12.6826	24.024	0.116373	0.310201	0.193828	0.232394
0	10	1145	9	12.4716	23.099	-0.279795	0.136008	0.415804	0.675633
0	10	1146	9	12.7515	24.0105	-0.0646567	0.408992	0.473649	0.599802
0	10	1147	9	12.4196	23.5009	-0.0231317	0.347715	0.370847	0.466694
0	10	1148	9	13.61	23.4415	0.16827	0.521642	0.353373	0.492992
0	10	1149	9	12.1689	25.4303	0.106592	0.36166	0.255068	0.522458
0	10	1150	9	12.9679	23.8726	0.0365652	0.379737	0.343172	0.406528
0	10	1151	9	12.7866	24.7177	0.208767	0.406105	0.197338	0.279883
0	10	1152	9	12.7798	23.7571	-0.0610223	0.210354	0.271376	0.507371
0	10	1153	9	12.5612	24.8741	0.0887553	0.305903	0.217148	0.543755
0	10	1154	9	12.2182	25.4998	0.035407	0.326945	0.291538	0.426181
0	10	1155	9	11.4569	24.8302	-0.153652	0.249478	0.40313	0.586029
0	10	1156	9	12.127	23.5543	-0.172179	0.174392	0.346571	0.458043
0	10	1157	9	12.9183	24.0138	-0.154502	0.178477	0.332978	0.568594
0	10	1158	9	12.6857	24.1519	0.0255836	0.265175	0.239592	0.548455
0	10	1159	9	12.2963	24.1452	-0.0509338	0.258922	0.309855	0.427575
0	10	1160	9	11.8194	24.6062	-0.0154533	0.187407	0.20286	0.492419
0	10	1161	9	11.7327	23.019	-0.132761	0.12811	0.260872	0.556623
0	10	1162	9	12.5889	24.5686	-0.16223	0.222464	0.384693	0.492086
0	10	1163	9	12.4307	23.9566	0.0874506	0.273129	0.185678	0.297176
0	10	1164	9	12.7935	24.2401	-0.0820013	0.381263	0.463264	0.645055
0	10	1165	9	12.4504	23.9949	-0.181963	0.222367	0.404329	0.577864
0	10	1166	9	11.7293	25.3772	-0.0544932	0.30012	0.354613	0.644772
0	10	1167	9	12.7025	23.4385	0.0393295	0.262984	0.223655	0.539766
0	10	1168	9	12.305	24.1457	0.0459257	0.215225	0.169299	0.357701
0	10	1169	9	11.626	23.8918	-0.185242	0.203861	0.389103	0.734516
0	10	1170	9	12.1085	23.8117	-0.0403859	0.323556	0.363942	0.481229
0	10	1171	9	11.5532	22.9102	-0.0513565	0.267483	0.318839	0.503831
0	10	1172	9	11.9782	23.61	-0.249613	0.247423	0.497036	0.676638
0	10	1173	9	12.0446	23.2908	0.0450049	0.387698	0.342693	0.464713
0	10	1174	9	12.6688	24.3961	0.0794957	0.215787	0.136291	0.376746
0	10	1175	9	12.401	23.0606	-0.0996402	0.141612	0.241253	0.472895
0	10	1176	9	13.3739	23.5139	-0.0430144	0.293824	0.336838	0.400292
0	10	1177	9	12.6591	23.4446	-0.00846947	0.280238	0.288708	0.506549
0	10	1178	9	12.9759	25.3858	-0.0361534	0.322452	0.358606	0.430694
0	10	1179	9	11.4631	23.6754	0.0410615	0.163329	0.122268	0.334834
0	10	1180	9	11.9584	23.6352	0.0688676	0.0391429	-0.0297247	0.222132
0	10	1181	9	12.1697	25.054	-0.0120044	0.470352	0.482356	0.662247
0	10	1182	9	12.3278	23.406	0.076475	0.343891	0.267416	0.295141
0	10	1183	9	13.6557	25.5397	-0.0922017	0.325029	0.417231	0.438369
0	10	1184	9	12.8564	23.3064	-0.0401842	0.246781	0.286965	0.411764
0	10	1185	9	13.0611	23.4848	0.00399542	0.334937	0.330941	0.397714
0	10	1186	9	12.6302	24.1922	-0.032313	0.150676	0.182989	0.388253
0	10	1187	9	12.4461	23.4726	-0.0691781	0.235379	0.304557	0.422466
0	10	1188	9	12.6376	24.1835	0.0465158	0.314687	0.268171	0.52616
0	10	1189	9	12.4692	23.0369	0.0519546	0.307084	0.25513	0.385301
0	10	1190	9	12.1745	23.9867	-0.0527283	0.166151	0.218879	0.526517
0	10	1191	9	12.4062	24.039	0.313086	0.303829	-0.00925722	0.235207
0	10	1192	9	12.861	23.7568	-0.110484	0.296684	0.407168	0.535184
0	10	1193	9	13.0323	24.656	0.0741518	0.349032	0.27488	0.546026
0	10	1194	9	13.1648	24.5568	0.289532	0.194992	-0.0945402	0.27372
0	10	1195	9	11.7717	24.4617	0.0911362	0.434336	0.3432	0.50277
0	10	1196	9	12.1639	24.484	-0.0679323	0.393697	0.46163	0.648592
0	10	1197	9	12.8678	25.6557	0.306368	0.544979	0.238611	0.425857
0	10	1198	9	12.3999	23.4258	-0.0667612	0.138018	0.20478	0.374458
0	10	1199	9	12.2656	23.1391	-0.000291575	0.119391	0.119683	0.401969
0	10	1200	9	11.9414	25.1137	0.189827	0.46303	0.273203	0.499604
0	10	1201	9	11.7686	24.5341	0.0406951	0.369458	0.328763	0.512545
0	10	1202	9	13.0344	23.7067	-0.111332	0.198714	0.310046	0.454983
0	10	1203	9	12.86	24.9776	-0.0677729	0.33387	0.401643	0.493706
0	10	1204	9	13.1381	24.5221	0.0141207	0.239741	0.22562	0.253231
0	10	1205	9	12.1772	24.5415	0.130683	0.273274	0.14259	0.574306
0	10	1206	9	11.912	25.7642	-0.0225044	0.431385	0.45389	0.651229
0	10	1207	9	11.4662	24.3877	-0.00827988	0.173777	0.182057	0.438862
0	10	1208	9	11.4863	23.8979	-0.0372875	0.202649	0.239936	0.424817
0	10	1209	9	12.3946	23.4838	-0.0682386	0.16843	0.236668	0.437722
0	10	1210	9	13.1494	24.5469	0.0321944	0.400655	0.368461	0.373946
0	10	1211	9	12.0068	24.8308	-0.0855678	0.264512	0.35008	0.633156
0	10	1212	9	12.7924	25.0421	0.158195	0.271515	0.113319	0.469749
0	10	1213	9	12.6677	23.5212	0.0701969	0.144258	0.074061	0.316889
0	10	1214	9	12.4132	24.6579	0.0416817	0.0557866	0.0141049	0.347224
0	10	1215	9	12.2766	24.9858	-0.0667996	0.129505	0.196305	0.422406
0	10	1216	9	12.7305	24.8908	-0.122553	0.109326	0.231879	0.385213
0	10	1217	9	12.0898	24.4583	0.0163546	0.267587	0.251233	0.321413
0	10	1218	9	12.9793	24.3326	-0.1002	0.1047	0.2049	0.425176
0	10	1219	9	11.7229	23.9192	-0.0595997	0.246246	0.305846	0.381009
0	10	1220	9	12.2845	24.6472	-0.0639488	0.242363	0.306312	0.556058
0	10	1221	9	12.8229	24.3051	-0.0256267	0.207603	0.233229	0.535974
0	10	1222	9	12.1925	23.7912	-0.147243	0.0967555	0.243999	0.53386
0	10	1223	9	12.8085	23.9598	0.0448276	0.349684	0.304856	0.510794
0	10	1224	9	13.2179	23.7352	-0.197964	0.243593	0.441558	0.600556
0	10	1225	9	12.087	24.1455	-0.0814524	0.435458	0.51691	0.719246
0	10	1226	9	12.2441	23.5615	-0.160416	0.281415	0.441831	0.659131
0	10	1227	9	11.5422	24.0793	-0.135224	0.23266	0.367884	0.648876
0	10	1228	9	11.624	24.0207	0.102862	0.178829	0.0759669	0.504818
0	10	1229	9	12.4037	24.0009	0.264315	0.373448	0.109133	0.28621
0	10	1230	9	12.3131	23.2459	-0.084515	0.242086	0.326601	0.449956
0	10	1231	9	11.9042	23.9303	-0.196272	0.219059	0.41533	0.5461
0	10	1232	9	12.2995	23.517	-0.0256763	0.335929	0.361605	0.529721
0	10	1233	9	12.3077	23.7456	-0.0228948	0.227536	0.25043	0.420626
0	10	1234	9	12.1054	24.3795	-0.0564889	0.234642	0.291131	0.460207
0	10	1235	9	12.6243	24.167	-0.0409839	0.166289	0.207273	0.485211
0	10	1236	9	12.5559	23.6776	-0.0361483	0.211145	0.247293	0.420925
0	10	1237	9	12.6031	24.0429	-0.035888	0.149362	0.18525	0.323746
0	10	1238	9	12.5599	23.1831	-0.0493368	0.318017	0.367354	0.474873
0	10	1239	9	11.4976	23.7061	0.0483955	0.147452	0.0990562	0.522901
0	10	1240	9	12.176	23.3751	-0.102134	0.280711	0.382845	0.446645
0	10	1241	9	11.289	24.0293	0.104366	0.273742	0.169376	0.339126
0	10	1242	9	13.0079	23.5637	-0.122475	0.268165	0.39064	0.508916
0	10	1243	9	12.0186	23.6341	-0.147542	0.145658	0.2932	0.598194
0	10	1244	9	11.484	23.6472	-0.0603073	0.233288	0.293595	0.427758
0	10	1245	9	12.4564	24.951	-0.0390711	0.348015	0.387086	0.522874
0	10	1246	9	11.7315	24.1142	-0.109851	0.228411	0.338263	0.45622
0	10	1247	9	12.3836	24.4185	-0.0837593	0.356977	0.440736	0.534884
0	10	1248	9	12.8744	24.2913	0.0201996	0.342407	0.322208	0.522456
0	10	1249	9	12.6815	24.4076	0.0231331	0.291221	0.268088	0.331913
0	10	1250	9	11.3787	24.073	0.0571097	0.274186	0.217076	0.450441
0	10	1251	9	11.9891	23.9441	-0.197545	0.426155	0.6237	0.777138
0	10	1252	9	12.8767	24.985	-0.00701046	0.430003	0.437014	0.53031
0	10	1253	9	13.445	23.7445	0.095153	0.223613	0.12846	0.327047
0	10	1254	9	12.9764	23.2117	-0.0451326	0.264024	0.309156	0.388537
0	10	1255	9	11.8638	23.2797	-0.134642	0.27066	0.405303	0.529343
0	10	1256	9	12.012	23.8463	-0.144072	0.31462	0.458692	0.903477
0	10	1257	9	12.5031	23.4705	0.0418528	0.287456	0.245603	0.372958
0	10	1258	9	10.9963	23.4278	0.148996	0.22591	0.0769141	0.476806
0	10	1259	9	11.9205	24.9506	0.0287259	0.333088	0.304362	0.649013
0	10	1260	9	13.204	24.2994	0.0398252	0.463948	0.424123	0.668021
0	10	1261	9	12.0023	25.1549	-0.0213448	0.297786	0.319131	0.447452
0	10	1262	9	12.6843	24.7828	0.338381	0.516338	0.177957	0.154733
0	10	1263	9	13.0733	23.5142	0.107432	0.345035	0.237603	0.289425
0	10	1264	9	12.7272	24.2155	-0.0296494	0.383292	0.412941	0.568147
0	10	1265	9	12.1218	24.9807	0.311699	0.303219	-0.00848013	0.320077
0	10	1266	9	13.1259	24.2748	0.00707333	0.199614	0.19254	0.317526
0	10	1267	9	12.7726	24.3524	0.1888	0.472564	0.283764	0.437994
0	10	1268	9	11.3939	23.8119	-0.0712505	0.166456	0.237707	0.634033
0	10	1269	9	11.8982	23.2397	-0.0116722	0.184329	0.196001	0.357882
0	10	1270	9	12.3025	23.6728	0.0730388	0.346212	0.273173	0.586561
0	10	1271	9	11.5176	23.1581	0.18675	0.329174	0.142424	0.559998
0	10	1272	9	12.2612	23.8238	0.142986	0.292797	0.149811	0.477658
0	10	1273	9	12.3384	23.6429	0.0192893	0.198888	0.179598	0.309459
0	10	1274	9	11.9836	23.791	0.00706641	0.324445	0.317378	0.496258
0	10	1275	9	12.416	24.2123	-0.0459023	0.315186	0.361089	0.425266
0	10	1276	9	12.4746	22.9463	0.0714651	0.506893	0.435428	0.683143
0	10	1277	9	13.1473	24.2594	0.0359837	0.289386	0.253403	0.471328
0	10	1278	9	12.3025	24.7219	0.0231078	0.413458	0.39035	0.684638
0	10	1279	9	13.0893	23.6977	0.0423101	0.353968	0.311657	0.466757
0	10	1280	9	11.9466	24.2731	-0.0949196	0.371283	0.466202	0.713546
0	10	1281	9	13.2542	23.8361	0.281298	0.426559	0.145261	0.282642
0	10	1282	9	11.5432	25.1964	0.0704657	0.372399	0.301933	0.504219
0	10	1283	9	11.2791	23.3706	0.106695	0.38995	0.283255	0.479058
0	10	1284	9	12.5702	23.232	-0.0240066	0.4173	0.441306	0.516012
0	10	1285	9	11.4338	23.2912	0.409417	0.254742	-0.154675	-0.0238197
0	10	1286	9	12.129	23.0649	0.0990646	0.281641	0.182576	0.40353
0	10	1287	9	12.3557	24.8488	-0.0801304	0.386757	0.466888	0.378968
0	10	1288	9	13.3319	23.7037	0.072336	0.231223	0.158887	0.357534
0	10	1289	9	11.8825	23.6812	0.0234071	0.324401	0.300994	0.343393
0	10	1290	9	12.4237	24.3502	0.0213612	0.253983	0.232622	0.432101
0	10	1291	9	12.3529	24.3663	0.101821	0.365992	0.264171	0.369906
0	10	1292	9	12.0901	24.8987	0.0135267	0.291427	0.277901	0.411678
0	10	1293	9	12.1702	23.0638	-0.0975494	0.119397	0.216947	0.619834
0	10	1294	9	11.4754	23.967	-0.0354353	0.191097	0.226533	0.496426
0	10	1295	9	12.6391	24.7823	0.310775	0.402355	0.0915792	0.257282
0	10	1296	9	11.9681	24.4754	0.101384	0.332692	0.231308	0.402417
0	10	1297	9	11.9921	24.6356	0.12676	0.293993	0.167233	0.458147
0	10	1298	9	12.1762	24.4743	-0.00456251	0.314011	0.318573	0.457365
0	10	1299	9	13.0385	24.0903	0.074338	0.172135	0.0977974	0.340958
0	10	1300	9	12.1829	23.4009	0.142845	0.275751	0.132906	0.252373
0	10	1301	9	12.5655	24.2677	0.220092	0.389965	0.169873	0.276829
0	10	1302	9	13.2238	23.7317	0.0413471	0.333713	0.292366	0.460398
0	10	1303	9	11.5223	24.2583	0.0703339	0.208562	0.138228	0.292242
0	10	1304	9	11.7132	23.8928	0.286664	0.347601	0.0609365	0.24763
0	10	1305	9	12.4967	25.124	0.243828	0.433856	0.190028	0.26518
0	10	1306	9	11.297	23.2778	-0.055116	0.173187	0.228303	0.459372
0	10	1307	9	12.0405	23.9938	-0.0530376	0.353763	0.406801	0.612693
0	10	1308	9	12.8538	23.0858	0.0704614	0.24986	0.179398	0.380462
0	10	1309	9	12.4786	24.2867	0.308147	0.456771	0.148624	0.149434
0	10	1310	9	13.0769	24.596	0.272741	0.429805	0.157064	0.210786
0	10	1311	9	11.212	24.2084	0.253774	0.368265	0.114491	0.12632
0	10	1312	9	12.378	24.5325	0.0632182	0.31527	0.252052	0.509
0	10	1313	9	12.6792	23.9645	0.0429777	0.380657	0.33768	0.474765
0	10	1314	9	12.9026	24.0143	0.0680802	0.327063	0.258983	0.321357
0	10	1315	9	12.8298	24.7629	0.2255	0.285591	0.0600906	0.180754
0	10	1316	9	11.7273	24.6739	0.0396828	0.313035	0.273352	0.502674
0	10	1317	9	13.4218	24.0308	0.221702	0.337854	0.116152	0.323861
0	10	1318	9	13.0356	23.4126	-0.0603415	0.128227	0.188568	0.427492
0	10	1319	9	12.3232	23.842	0.088798	0.135304	0.0465056	0.414759
0	10	1320	9	11.9926	24.5303	-0.0888489	0.1786	0.267449	0.499386
0	10	1321	9	11.4481	24.0004	0.171124	0.120025	-0.0510992	0.199151
0	10	1322	9	11.8815	23.3089	0.125388	0.135217	0.00982837	0.487733
0	10	1323	9	12.6518	23.9557	-0.184874	0.370458	0.555333	0.870253
0	10	1324	9	12.0718	23.3686	0.194718	0.374798	0.180079	0.415783
0	10	1325	9	11.6821	24.3342	0.211205	0.252032	0.0408269	0.359345
0	10	1326	9	13.0314	23.8087	0.00924944	0.142973	0.133724	0.50444
0	10	1327	9	12.9499	23.5976	-0.025463	0.18151	0.206973	0.638209
0	10	1328	9	11.7297	23.5339	-0.254757	0.0539828	0.308739	0.548795
0	10	1329	9	12.1706	23.9317	0.018995	0.144007	0.125012	0.314704
0	10	1330	9	12.2208	23.6492	-0.0258346	0.147535	0.17337	0.591276
0	10	1331	9	12.2792	23.5977	0.0382669	0.296487	0.25822	0.514826
0	10	1332	9	11.7862	23.6222	-0.0653084	0.283942	0.34925	0.614665
0	10	1333	9	12.8302	23.6189	-0.00600312	0.487421	0.493424	0.687591
0	10	1334	9	12.0652	24.1934	0.0347928	0.353893	0.3191	0.315034
0	10	1335	9	12.2425	23.9759	-0.130535	0.212693	0.343227	0.446025
0	10	1336	9	11.8894	23.5369	-0.00997373	0.17206	0.182033	0.222617
0	10	1337	9	12.0136	23.4937	-0.0176004	0.194946	0.212547	0.363427
0	10	1338	9	12.0787	23.4264	0.0774794	0.190837	0.113357	0.346909
0	10	1339	9	11.8544	23.6259	-0.0325315	0.272625	0.305157	0.576937
0	10	1340	9	12.4429	23.0173	0.0893109	0.227799	0.138488	0.237342
0	11	1341	6	12.994	23.96	-0.092819	0.100557	0.193376	0.371141
0	11	1341	9	12.994	23.96	-0.124817	0.311713	0.43653	0.487161
0	11	1342	6	13.2256	23.4824	-0.00637535	0.123658	0.130033	0.273959
0	11	1342	9	13.2256	23.4824	-0.0244189	0.261097	0.285516	0.411465
0	11	1343	6	12.5675	22.9582	-0.0768341	0.0642223	0.141056	0.561892
0	11	1343	9	12.5675	22.9582	-0.0512817	0.1807	0.231982	0.538339
0	11	1344	6	13.0305	23.659	0.135071	0.212156	0.0770847	0.583726
0	11	1344	9	13.0305	23.659	0.285417	0.384527	0.0991099	0.448199
0	11	1345	6	12.4261	23.5971	0.174533	0.301719	0.127186	0.494759
0	11	1345	9	12.4261	23.5971	0.254058	0.410869	0.156811	0.389582
0	11	1346	6	11.9715	23.0735	0.0638026	0.146385	0.0825823	0.432523
0	11	1346	9	11.9715	23.0735	0.0973661	0.311638	0.214272	0.374563
0	11	1347	6	11.8212	23.8626	-0.0191773	0.143125	0.162302	0.491357
0	11	1347	9	11.8212	23.8626	0.14601	0.373922	0.227912	0.457531
0	11	1348	6	12.1714	23.6455	0.079785	0.21952	0.139735	0.588153
0	11	1348	9	12.1714	23.6455	0.140754	0.416059	0.275305	0.579438
0	11	1349	6	11.4681	24.7455	0.179652	0.22498	0.045328	0.350291
0	11	1349	9	11.4681	24.7455	0.241791	0.28748	0.0456893	0.332482
0	11	1350	6	12.2272	24.1938	-0.0388198	0.157334	0.196154	0.707978
0	11	1350	9	12.2272	24.1938	-0.0829313	0.296103	0.379034	0.67761
0	11	1351	6	12.3664	23.4653	-0.0207875	0.204767	0.225555	0.371126
0	11	1351	9	12.3664	23.4653	-0.0062853	0.233985	0.24027	0.361046
0	11	1352	6	12.2634	24.9613	0.0872662	0.146076	0.0588102	0.542555
0	11	1352	9	12.2634	24.9613	0.183416	0.309018	0.125602	0.432959
0	11	1353	6	12.2585	24.7233	0.0909017	0.165093	0.0741915	0.379854
0	11	1353	9	12.2585	24.7233	0.118348	0.311591	0.193243	0.362971
0	11	1354	6	12.6478	24.0749	0.00325124	0.18687	0.183618	0.472918
0	11	1354	9	12.6478	24.0749	-0.0586213	0.206929	0.26555	0.485051
0	11	1355	6	12.2132	23.6824	-0.0780731	0.0522644	0.130338	0.664986
0	11	1355	9	12.2132	23.6824	-0.0569822	0.146754	0.203736	0.591091
0	11	1356	6	11.6988	23.8789	0.152733	0.181747	0.0290135	0.476224
0	11	1356	9	11.6988	23.8789	0.359976	0.329883	-0.0300929	0.317937
0	11	1357	6	12.1703	23.9437	-0.0116949	0.040955	0.0526499	0.406679
0	11	1357	9	12.1703	23.9437	0.0418078	0.148081	0.106273	0.43966
0	11	1358	6	12.909	23.4924	0.00165241	0.118687	0.117035	0.430965
0	11	1358	9	12.909	23.4924	-0.12429	0.15227	0.276561	0.506229
0	11	1359	6	11.7234	23.1899	-0.0123255	0.253152	0.265478	0.638245
0	11	1359	9	11.7234	23.1899	-0.0209681	0.224638	0.245606	0.565174
0	11	1360	6	12.5271	24.7969	-0.0312506	0.205092	0.236343	0.568577
0	11	1360	9	12.5271	24.7969	-0.0282373	0.25208	0.280318	0.552285
0	11	1361	6	13.4001	24.8164	0.0509218	0.111426	0.0605041	0.354151
0	11	1361	9	13.4001	24.8164	0.0821832	0.234865	0.152682	0.354704
0	11	1362	6	11.8111	23.5531	-0.070391	0.347323	0.417714	0.772275
0	11	1362	9	11.8111	23.5531	-0.152703	0.365122	0.517825	0.783413
0	11	1363	9	12.1277	23.4347	-0.0979275	0.348332	0.446259	0.790188
0	11	1364	6	12.2256	24.1172	0.0450145	0.262415	0.2174	0.704036
0	11	1364	9	12.2256	24.1172	-0.0787585	0.302268	0.381026	0.704777
0	11	1365	6	11.4153	23.1871	-0.00486974	0.151046	0.155916	0.403712
0	11	1365	9	11.4153	23.1871	0.130702	0.237985	0.107283	0.401583
0	11	1366	6	13.278	23.1975	-0.0754576	0.107436	0.182894	0.443036
0	11	1366	9	13.278	23.1975	0.0151386	0.217738	0.202599	0.369499
0	11	1367	6	12.4321	24.3137	0.0224468	0.24813	0.225683	0.543116
0	11	1367	9	12.4321	24.3137	-0.0112171	0.272792	0.284009	0.56538
0	11	1368	6	12.9047	24.7528	-0.127502	0.161794	0.289296	0.581462
0	11	1368	9	12.9047	24.7528	-0.178649	0.192895	0.371544	0.556407
0	11	1369	6	12.9643	24.611	0.0405919	0.217438	0.176846	0.431508
0	11	1369	9	12.9643	24.611	0.0919377	0.289665	0.197728	0.406385
0	11	1370	6	11.8732	24.9661	-0.0228833	0.194522	0.217405	0.394869
0	11	1370	9	11.8732	24.9661	0.0417608	0.236035	0.194274	0.355701
0	11	1371	6	13.0057	24.9093	-0.0210106	0.165349	0.186359	0.422733
0	11	1371	9	13.0057	24.9093	-0.0064175	0.153907	0.160325	0.318327
0	11	1372	6	12.6963	25.089	0.107477	0.18232	0.0748427	0.408914
0	11	1372	9	12.6963	25.089	0.29609	0.437602	0.141512	0.382101
0	11	1373	6	11.078	24.75	0.078735	0.316865	0.23813	0.487061
0	11	1373	9	11.078	24.75	0.207739	0.361427	0.153688	0.31119
0	11	1374	6	11.6004	24.5446	-0.0684056	0.171824	0.240229	0.583533
0	11	1374	9	11.6004	24.5446	-0.154738	0.381781	0.536519	0.703132
0	11	1375	6	12.2564	24.7812	-0.0903564	0.154784	0.245141	0.515535
0	11	1375	9	12.2564	24.7812	-0.185691	0.241284	0.426975	0.591337
0	11	1376	6	12.8915	24.7732	-0.0513095	0.147142	0.198451	0.348386
0	11	1376	9	12.8915	24.7732	-0.0800652	0.288058	0.368123	0.416827
0	11	1377	6	13.1407	24.3124	-0.099607	0.147564	0.247171	0.386521
0	11	1377	9	13.1407	24.3124	-0.093941	0.273486	0.367427	0.453617
0	11	1378	6	12.4364	25.1468	-0.000993703	0.154441	0.155435	0.601295
0	11	1378	9	12.4364	25.1468	0.00324606	0.219184	0.215938	0.458181
0	11	1379	6	11.4889	24.0189	0.159134	0.142235	-0.0168984	0.33964
0	11	1379	9	11.4889	24.0189	0.259329	0.265154	0.00582489	0.248692
0	11	1380	6	12.15	24.8589	-0.0435552	0.170062	0.213617	0.383835
0	11	1380	9	12.15	24.8589	-0.0464623	0.204719	0.251181	0.474006
0	11	1381	6	10.9481	24.3954	-0.0102173	0.146173	0.156391	0.493583
0	11	1381	9	10.9481	24.3954	-0.0383534	0.172385	0.210738	0.434327
0	11	1382	6	11.8727	24.8877	-0.106378	0.150828	0.257206	0.441259
0	11	1382	9	11.8727	24.8877	-0.182191	0.254886	0.437078	0.505278
0	11	1383	6	12.4495	24.3995	-0.0215941	0.198965	0.220559	0.390768
0	11	1383	9	12.4495	24.3995	0.0943195	0.210471	0.116151	0.292963
0	11	1384	6	11.8958	25.2181	-0.0581382	0.145296	0.203435	0.401277
0	11	1384	9	11.8958	25.2181	-0.00624298	0.170458	0.176701	0.394445
0	11	1385	6	12.794	25.0082	0.0585432	0.247384	0.188841	0.36281
0	11	1385	9	12.794	25.0082	0.0789322	0.316832	0.237899	0.338898
0	11	1386	6	13.3261	23.7797	-0.117028	0.129792	0.24682	0.504877
0	11	1386	9	13.3261	23.7797	-0.0190038	0.258294	0.277298	0.507076
0	11	1387	6	13.2605	23.8716	-0.11833	0.187357	0.305687	0.419792
0	11	1387	9	13.2605	23.8716	-0.203403	0.264728	0.468131	0.618635
0	11	1388	6	12.6372	24.2881	-0.0846191	0.0990377	0.183657	0.395859
0	11	1388	9	12.6372	24.2881	-0.164979	0.194021	0.359	0.474302
0	11	1389	6	12.293	23.554	0.0492913	0.24711	0.197818	0.387656
0	11	1389	9	12.293	23.554	0.10621	0.586396	0.480186	0.505346
0	11	1390	9	12.6248	25.107	-0.00698847	0.213513	0.220502	0.460956
0	11	1391	9	12.3661	23.7268	0.121339	0.15564	0.0343015	0.28441
0	11	1392	9	12.5834	23.9955	-0.0574055	0.212886	0.270292	0.484188
0	11	1393	9	12.1869	23.6171	-0.128495	0.285402	0.413897	0.601961
0	11	1394	9	12.7124	24.2255	-0.112956	0.171304	0.284259	0.539927
0	11	1395	9	11.6742	24.1982	-0.0807639	0.206403	0.287167	0.436024
0	11	1396	9	11.3606	24.9362	0.000294431	0.284947	0.284653	0.439762
0	11	1397	9	12.9708	23.2707	-0.200629	0.0605781	0.261208	0.423269
0	11	1398	9	12.8252	24.2019	-0.0633046	0.138535	0.20184	0.47416
0	11	1399	9	12.2547	22.8856	0.12063	0.232264	0.111634	0.417003
0	11	1400	9	12.6633	24.3721	0.211049	0.274114	0.0630657	0.333683
0	11	1401	9	11.6324	25.0844	0.0927613	0.23659	0.143829	0.469565
0	11	1402	9	12.0445	23.7432	0.208273	0.225988	0.0177143	0.183923
0	11	1403	9	11.6909	24.009	-0.181386	0.178564	0.35995	0.676069
0	11	1404	9	13.1458	24.7948	-0.126473	0.38111	0.507583	0.613227
0	11	1405	9	11.4899	23.1051	-0.111124	0.26247	0.373593	0.587119
0	11	1406	9	12.3898	24.0243	-0.0764351	0.270603	0.347038	0.588125
0	11	1407	9	12.076	23.8771	0.249898	0.270885	0.0209865	0.247204
0	11	1408	9	12.0418	23.9668	-0.0873461	0.153573	0.240919	0.437026
0	11	1409	9	12.7106	24.4982	-0.184741	0.191485	0.376226	0.636857
0	11	1410	9	12.1075	23.7678	-0.116251	0.166093	0.282344	0.615208
0	11	1411	9	12.0608	24.2149	-0.0547975	0.247772	0.30257	0.484369
0	11	1412	9	12.2049	25.0914	-0.00472734	0.284026	0.288753	0.529417
0	11	1413	9	12.2312	24.0605	0.0702732	0.303579	0.233306	0.484704
0	11	1414	9	12.7898	24.0622	-0.0822681	0.398669	0.480937	0.575331
0	11	1415	9	11.0734	24.0514	-0.0227629	0.379507	0.40227	0.537761
0	11	1416	9	11.5363	23.6198	-0.10006	0.235423	0.335483	0.467767
0	11	1417	9	11.3866	23.9397	-0.11379	0.296541	0.410331	0.633783
0	11	1418	9	11.5668	25.0084	0.201894	0.291021	0.0891275	0.370307
0	11	1419	9	12.7206	24.9561	-0.133393	0.208477	0.34187	0.463301
0	11	1420	9	11.9763	25.1353	0.245122	0.34507	0.0999486	0.532511
0	11	1421	9	12.1198	25.2497	0.344354	0.44789	0.103536	0.357136
0	11	1422	9	11.8984	25.2037	0.534252	0.412764	-0.121488	0.0734219
0	11	1423	9	11.6135	23.4941	0.0327481	0.399516	0.366768	0.583132
0	11	1424	9	12.5676	23.8648	-0.0122844	0.344464	0.356748	0.579013
0	11	1425	9	13.16	23.9795	0.125767	0.388022	0.262255	0.518275
0	11	1426	9	12.1896	25.212	0.0953934	0.313173	0.21778	0.358556
0	11	1427	9	13.0427	24.3337	0.0680384	0.24226	0.174222	0.448313
0	11	1428	9	13.0445	24.7034	0.030372	0.289351	0.258979	0.557653
0	11	1429	9	12.5387	24.5442	0.193379	0.321491	0.128112	0.416539
0	11	1430	9	11.7177	24.3932	-0.0539163	0.271609	0.325526	0.624901
0	11	1431	9	12.9079	23.9074	-0.0833761	0.207495	0.290871	0.67851
0	11	1432	9	12.4906	25.0394	-0.0673763	0.243388	0.310765	0.564068
0	11	1433	9	13.0872	23.9551	0.0398755	0.233382	0.193506	0.437373
0	11	1434	9	12.7591	24.3152	0.117038	0.292693	0.175655	0.44863
0	11	1435	9	12.0391	24.8089	0.153476	0.306305	0.152829	0.485415
0	11	1436	9	12.523	23.9738	0.0411839	0.194362	0.153178	0.413426
0	11	1437	9	12.4285	24.8816	-0.141733	0.210231	0.351964	0.672777
0	11	1438	9	13.44	24.1909	-0.0143755	0.176475	0.19085	0.472128
0	11	1439	9	12.1963	23.215	-0.0071184	0.110527	0.117646	0.386103
0	11	1440	9	12.7143	23.5764	0.0762021	0.186277	0.110074	0.392469
0	11	1441	9	12.699	23.4657	-0.0927286	0.26812	0.360849	0.680692
0	11	1442	9	12.501	23.7719	-0.125241	0.307661	0.432902	0.654176
0	11	1443	9	13.8453	23.5879	0.0194245	0.260192	0.240767	0.615062
0	11	1444	9	12.2472	24.4197	0.0686786	0.292201	0.223523	0.340214
0	11	1445	9	13.0741	24.6628	0.0158775	0.224107	0.20823	0.436666
0	11	1446	9	12.7344	24.5945	-0.0132474	0.229961	0.243208	0.617908
0	11	1447	9	11.5592	25.0185	-0.0934821	0.124523	0.218005	0.503413
0	11	1448	9	12.1826	23.8986	-0.0332642	0.159463	0.192727	0.524366
0	11	1449	9	12.2425	24.315	-0.0166349	0.174954	0.191589	0.474206
0	11	1450	9	12.0068	23.4623	-0.0711864	0.105169	0.176355	0.385819
0	11	1451	9	12.1342	24.9512	-0.0733502	0.241265	0.314615	0.545183
0	11	1452	9	12.6981	24.5868	-0.0646261	0.120816	0.185442	0.370598
0	11	1453	9	12.1794	24.9831	-0.105435	0.273211	0.378646	0.507317
0	11	1454	9	12.7899	24.7971	0.266759	0.28557	0.0188116	0.30732
0	11	1455	9	13.4776	25.2553	-0.0894288	0.398922	0.488351	0.529751
0	11	1456	9	12.3337	23.6177	0.219465	0.387669	0.168205	0.229286
0	11	1457	9	12.7279	23.6893	0.0891344	0.190569	0.101434	0.30458
0	11	1458	9	12.7194	23.0701	-0.126276	0.114241	0.240518	0.54635
0	11	1459	9	13.7313	24.318	-0.141357	0.159942	0.301299	0.498799
0	11	1460	9	12.1634	22.9485	-0.070269	0.242426	0.312695	0.428395
0	11	1461	9	12.8824	23.8558	-0.0625152	0.223038	0.285553	0.376048
0	11	1462	9	12.484	23.8308	-0.0584108	0.223519	0.28193	0.449
0	11	1463	9	13.3688	23.6984	-0.0804834	0.167172	0.247655	0.478899
0	11	1464	9	12.7648	23.9242	0.000734078	0.231177	0.230443	0.37087
0	11	1465	9	11.8674	24.746	-0.0301629	0.248456	0.278619	0.50953
0	11	1466	9	12.7045	23.7134	-0.146088	0.225966	0.372053	0.557837
0	11	1467	9	11.882	24.2489	-0.0617659	0.245188	0.306954	0.409362
0	11	1468	9	12.7504	24.8727	-0.19855	0.0381824	0.236733	0.467176
0	11	1469	9	11.8465	24.6079	0.133552	0.202204	0.0686518	0.423243
0	11	1470	9	12.4359	24.4487	0.0377458	0.181737	0.143992	0.437233
0	11	1471	9	12.8066	24.2569	-0.0929045	0.193873	0.286778	0.48042
0	11	1472	9	13.4242	24.4845	-0.0261017	0.229881	0.255983	0.342173
0	11	1473	9	11.3727	24.5821	0.191746	0.298124	0.106378	0.351419
0	11	1474	9	13.5348	23.2994	-0.0762309	0.212167	0.288398	0.424109
0	11	1475	9	12.6026	25.2544	0.0188026	0.284792	0.265989	0.351762
0	11	1476	9	11.9927	24.6537	0.083007	0.200513	0.117506	0.472384
0	11	1477	9	11.9086	25.4418	0.0662655	0.371769	0.305504	0.423118
0	11	1478	9	12.9042	25.4225	0.00234206	0.336698	0.334356	0.476982
0	11	1479	9	12.6569	24.3283	-0.10425	0.0893702	0.19362	0.37949
0	11	1480	9	13.5099	23.927	0.0356315	0.206207	0.170576	0.333332
0	11	1481	9	13.3533	24.805	-0.0693889	0.230098	0.299487	0.379888
0	11	1482	9	12.2429	24.2067	-0.0647013	0.15583	0.220531	0.361506
0	11	1483	9	12.1617	24.9819	-0.08146	0.213939	0.295399	0.418287
0	11	1484	9	12.232	23.8723	-0.110639	0.0934528	0.204091	0.450395
0	11	1485	9	12.101	24.3952	0.0129695	0.299454	0.286484	0.426444
0	11	1486	9	12.4248	24.6294	0.242784	0.270538	0.0277543	0.393581
0	11	1487	9	13.6549	24.0674	-0.0144045	0.230191	0.244595	0.461097
0	11	1488	9	12.8421	25.1533	0.0243212	0.226543	0.202222	0.294573
0	11	1489	9	12.9889	23.4525	0.243939	0.323941	0.0800023	0.381469
0	11	1490	9	13.2248	23.9023	0.137353	0.34771	0.210356	0.383677
0	11	1491	9	12.0846	24.2047	0.1933	0.420351	0.227051	0.357213
0	11	1492	9	12.539	24.6269	0.247615	0.373154	0.125539	0.293017
0	11	1493	9	11.9057	25.1314	-0.0967098	0.33202	0.42873	0.596311
0	11	1494	9	13.2662	24.5797	-0.139788	0.109226	0.249013	0.441459
0	11	1495	9	11.7959	25.219	-0.0824209	0.269433	0.351854	0.48535
0	11	1496	9	12.4142	24.5451	-0.0202829	0.273481	0.293763	0.435952
0	11	1497	9	12.8093	24.342	0.0837833	0.355412	0.271628	0.513578
0	11	1498	9	12.0807	24.7	-0.0160783	0.220369	0.236448	0.500268
0	11	1499	9	12.7259	23.4576	0.00890696	0.116082	0.107175	0.314089
0	11	1500	9	12.0849	23.7241	-0.111636	0.348866	0.460503	0.573125
0	11	1501	9	12.4213	24.4421	-0.063828	0.248388	0.312216	0.381313
0	11	1502	9	11.5391	25.3329	0.0216435	0.239769	0.218126	0.363732
0	11	1503	9	12.9074	24.3738	0.130612	0.383734	0.253122	0.411389
0	11	1504	9	12.7582	24.9317	0.0888091	0.434061	0.345252	0.432762
0	11	1505	9	13.2217	24.5229	-0.107318	0.295112	0.40243	0.456946
0	11	1506	9	11.956	24.3516	-0.139525	0.260472	0.399998	0.586135
0	11	1507	9	10.9744	24.085	0.194033	0.300983	0.10695	0.234958
0	11	1508	9	12.671	24.2067	-0.011422	0.213271	0.224693	0.367069
0	11	1509	9	12.5608	25.5946	-0.106338	0.447528	0.553865	0.61726
0	11	1510	9	11.6812	24.1055	0.00429775	0.258021	0.253723	0.446883
0	11	1511	9	12.0547	24.6151	0.063017	0.274354	0.211337	0.400005
0	11	1512	9	11.8888	24.1523	0.11772	0.195274	0.0775547	0.380672
0	11	1513	9	12.3344	24.3697	0.060513	0.312743	0.25223	0.449872
0	11	1514	9	12.9966	24.0401	-0.0103564	0.20913	0.219487	0.449531
0	11	1515	9	12.7902	23.094	0.187339	0.276457	0.0891181	0.253714
0	11	1516	9	12.8141	25.2172	-0.154444	0.292923	0.447367	0.354718
0	11	1517	9	12.5244	25.3208	-0.196635	0.272062	0.468697	0.662168
0	11	1518	9	12.4846	24.4592	0.143797	0.38679	0.242993	0.443866
0	11	1519	9	12.7467	24.0371	-0.0154652	0.242918	0.258384	0.550281
0	11	1520	9	13.302	23.4803	-0.0664693	0.195233	0.261702	0.415727
0	11	1521	9	13.5059	25.2991	-0.0428097	0.249028	0.291837	0.303292
0	11	1522	9	12.9253	23.5155	-0.141189	0.166575	0.307764	0.501524
0	11	1523	9	13.2586	24.8893	-0.24936	0.355152	0.604513	0.618961
0	11	1524	9	12.9553	23.8055	-0.228683	0.0145352	0.243219	0.406449
0	11	1525	9	12.8981	23.7154	-0.0693402	0.19693	0.266271	0.55705
0	11	1526	9	12.3735	23.7315	-0.0759477	0.154333	0.230281	0.366264
0	11	1527	9	13.2462	24.9673	0.0210283	0.14307	0.122042	0.259807
0	11	1528	9	13.2009	23.9578	-0.0698779	0.112559	0.182436	0.385566
0	11	1529	9	11.402	23.9971	0.0282497	0.229922	0.201673	0.417349
0	11	1530	9	12.1027	24.3598	-0.0426934	0.236021	0.278714	0.466526
0	11	1531	9	12.8931	24.3268	-0.0526271	0.184568	0.237195	0.388796
0	11	1532	9	12.8567	22.9278	-0.158684	0.0634956	0.22218	0.403533
0	11	1533	9	11.8456	24.0388	-0.0730693	0.152053	0.225122	0.431135
0	11	1534	9	12.1569	23.4127	-0.129247	0.243589	0.372836	0.48289
0	11	1535	9	12.691	24.0522	-0.0352418	0.162633	0.197874	0.398009
0	11	1536	9	13.4689	24.5845	-0.25533	0.148138	0.403468	0.532572
0	11	1537	9	12.8076	24.3744	-0.142597	0.15994	0.302538	0.467382
0	11	1538	9	13.2447	24.689	0.0798271	0.317176	0.237349	0.416629
0	11	1539	9	12.4567	24.1205	0.298113	0.168517	-0.129596	0.100247
0	11	1540	9	13.2074	24.1964	-0.0828658	0.158576	0.241442	0.409324
0	11	1541	9	12.2432	23.9864	0.00447954	0.312103	0.307623	0.468107
0	11	1542	9	13.4192	24.6199	-0.0893582	0.0938769	0.183235	0.363834
0	11	1543	9	12.1773	23.8921	-0.159684	0.227561	0.387245	0.508366
0	12	1544	9	13.0694	24.0039	0.0146764	0.44753	0.432853	0.417698
0	12	1545	9	13.2011	25.3267	0.112798	0.439869	0.327071	0.45237
0	12	1546	9	13.9541	24.8698	0.0997494	0.481203	0.381454	0.242942
0	12	1547	9	12.2758	24.3465	0.075262	0.446216	0.370954	0.31989
0	12	1548	9	13.0881	23.7929	0.104006	0.25424	0.150234	0.297973
0	12	1549	9	12.0613	23.779	-0.0337152	0.327706	0.361421	0.437347
0	12	1550	9	12.5059	25.6172	0.245443	0.280868	0.0354249	0.244417
0	12	1551	9	13.1808	23.5934	0.104657	0.259388	0.15473	0.291214
0	12	1552	9	12.4245	24.242	0.0731627	0.303026	0.229864	0.338069
0	12	1553	9	13.0765	23.9285	-0.030571	0.506023	0.536594	0.521755
0	12	1554	9	13.1106	24.734	0.243123	0.241615	-0.00150813	0.135864
0	12	1555	9	12.6945	24.4917	0.0860274	0.0561467	-0.0298807	0.269646
0	12	1556	9	13.7647	24.5937	0.0140235	0.316539	0.302516	0.4364
0	12	1557	9	13.8787	25.6808	-0.0763769	0.536613	0.61299	0.454595
0	12	1558	9	12.8129	25.5327	0.316944	0.26944	-0.0475035	0.162537
0	12	1559	9	13.537	25.2106	0.0649888	0.344448	0.279459	0.220292
0	12	1560	9	12.9002	25.0505	0.155739	0.314345	0.158606	0.0836553
0	12	1561	9	12.0057	24.1488	0.0222236	0.311604	0.289381	0.411674
0	12	1562	9	13.4835	24.599	0.135377	0.290809	0.155433	0.147109
0	12	1563	9	12.0492	24.7204	0.0214134	0.331391	0.309977	0.324009
0	12	1564	9	13.0899	24.2932	0.277602	0.313135	0.0355324	0.134219
0	12	1565	9	12.363	24.1687	0.0124342	0.233407	0.220973	0.334948
0	12	1566	9	11.6194	24.5612	-0.00746081	0.175671	0.183132	0.383526
0	12	1567	9	12.6394	24.6385	0.0985011	0.234456	0.135955	0.226329
0	12	1568	9	12.4347	24.6399	-0.144697	0.120307	0.265004	0.459009
0	12	1569	9	12.9571	26.0189	0.0186678	0.336897	0.31823	0.446237
0	12	1570	9	12.6021	23.9307	-0.106768	0.354787	0.461555	0.540692
0	12	1571	9	12.8296	24.3801	-0.0348257	0.119421	0.154247	0.354179
0	12	1572	9	13.1288	25.2607	-0.0120111	0.467557	0.479568	0.599412
0	12	1573	9	12.9769	25.1245	0.00747337	0.412899	0.405425	0.41342
0	12	1574	9	12.8727	24.3789	0.110774	0.372864	0.26209	0.290467
0	12	1575	9	12.3153	23.5221	0.00405119	0.1669	0.162849	0.338662
0	12	1576	9	12.3842	24.7925	0.255792	0.492109	0.236317	0.0942494
0	12	1577	9	11.7673	23.9458	0.131192	0.401683	0.270492	0.288799
0	12	1578	9	13.669	24.1471	0.0334061	0.297467	0.26406	0.349857
0	12	1579	9	13.1242	25.0963	0.0444556	0.267243	0.222787	0.188533
0	12	1580	9	12.8929	24.8359	0.0667465	0.325933	0.259187	0.4
0	12	1581	9	13.472	23.7697	-0.0414418	0.24095	0.282392	0.459352
0	12	1582	9	12.8451	24.22	0.169776	0.337136	0.167359	0.416709
0	12	1583	9	13.4869	24.943	0.456387	0.478127	0.0217406	0.122157
0	12	1584	9	12.9934	26.1105	-0.0041438	0.391995	0.396138	0.431042
0	12	1585	9	13.7071	25.6451	0.0605311	0.401904	0.341373	0.474074
0	12	1586	9	13.0052	24.5733	-0.0220812	0.257061	0.279142	0.506971
0	12	1587	9	13.3096	25.719	-0.122037	0.129578	0.251615	0.358313
0	12	1588	9	12.9223	25.7278	-0.17217	0.56214	0.73431	0.634373
0	12	1589	9	12.5539	24.2815	-0.102651	0.333891	0.436543	0.530311
0	12	1590	9	12.9199	24.9887	-0.0676228	0.219238	0.286861	0.59514
0	12	1591	9	13.2331	24.9482	0.108387	0.2957	0.187313	0.549415
0	12	1592	9	13.5332	25.0958	-0.024994	0.130606	0.1556	0.379552
0	12	1593	9	13.6039	26.2483	-0.143806	0.337384	0.48119	0.564203
0	12	1594	9	12.9512	25.2943	-0.0101105	0.359004	0.369114	0.537253
0	12	1595	9	13.5201	25.4063	0.0944485	0.293559	0.19911	0.444727
0	12	1596	9	12.0939	24.423	-0.263568	0.118377	0.381944	0.713683
0	12	1597	9	13.4832	25.0418	-0.210254	0.164003	0.374257	0.563287
0	12	1598	9	12.6755	23.6253	-0.147225	-0.0119499	0.135275	0.398583
0	12	1599	9	12.5496	23.4532	-0.125768	0.113784	0.239552	0.258087
0	12	1600	9	13.1568	23.8814	-0.209425	0.137152	0.346577	0.508521
0	12	1601	9	13.0474	24.7881	-0.0372265	0.32092	0.358147	0.455238
0	12	1602	9	12.9839	24.2029	0.100865	0.179525	0.07866	0.39789
0	12	1603	9	13.5572	24.2838	-0.122815	0.205464	0.32828	0.640858
0	12	1604	9	13.5251	23.9343	0.560026	0.0534215	-0.506605	-0.305071
0	12	1605	9	11.86	23.6433	-0.0687675	0.219973	0.28874	0.316827
0	12	1606	9	13.6837	25.3525	-0.00694249	0.330495	0.337438	0.497848
0	12	1607	9	11.6395	23.9323	-0.0438809	0.332659	0.37654	0.40641
0	12	1608	9	12.9445	24.8368	-0.1357	0.308342	0.444042	0.469418
0	12	1609	9	13.8703	24.2263	-0.0771619	0.201062	0.278224	0.372727
0	12	1610	9	13.2239	23.6868	-0.0796645	0.0755155	0.15518	0.35615
0	12	1611	9	12.7188	24.5762	-0.131801	0.112002	0.243803	0.305359
0	12	1612	9	12.2923	24.6652	-0.00497549	0.113885	0.118861	0.174586
0	12	1613	9	11.7058	23.6136	-0.0033113	0.0516421	0.0549534	0.118741
0	12	1614	9	12.4649	24.1891	-0.208253	0.306346	0.514599	0.627108
0	12	1615	9	11.9152	25.3786	-0.0222564	0.0819253	0.104182	0.399782
0	12	1616	9	13.232	24.8341	-0.168504	0.127858	0.296362	0.484373
0	12	1617	9	12.1999	24.0905	-0.130371	0.15154	0.28191	0.356151
0	12	1618	9	12.7333	24.6618	-0.148433	0.114302	0.262735	0.5062
0	12	1619	9	12.8314	25.0404	-0.13298	0.0170085	0.149989	0.515336
0	12	1620	9	12.6493	23.7842	-0.191558	0.15088	0.342438	0.52224
0	12	1621	9	11.789	23.8213	0.0345968	0.24136	0.206763	0.355243
0	12	1622	9	13.4832	24.9992	0.0366092	0.308854	0.272245	0.427782
0	12	1623	9	13.4736	24.143	-0.0848162	0.314575	0.399392	0.717615
0	12	1624	9	13.3901	23.8506	0.0625838	0.247293	0.184709	0.396594
0	12	1625	9	12.8805	23.7891	0.300314	0.266282	-0.0340327	0.140242
0	12	1626	9	12.2231	24.2011	0.262924	0.226227	-0.0366971	0.145579
0	12	1627	9	13.7099	24.8329	0.000233681	0.306177	0.305943	0.520442
0	12	1628	9	12.7365	24.0369	-0.134496	0.318307	0.452803	0.6161
0	12	1629	9	13.1219	23.9672	-0.132662	0.172357	0.305019	0.479656
0	12	1630	9	12.9714	24.9425	-0.147992	0.183218	0.33121	0.619773
0	12	1631	9	12.6554	24.9516	-0.0428203	0.276019	0.31884	0.363027
0	12	1632	9	13.2647	24.6159	-0.165206	0.0550934	0.2203	0.498299
0	12	1633	9	12.8514	23.9922	-0.163413	0.252399	0.415813	0.709754
0	12	1634	9	13.5487	24.2129	0.247114	0.0555426	-0.191571	0.0838424
0	12	1635	9	12.1326	23.6202	-0.0556394	0.173148	0.228788	0.566345
0	12	1636	9	12.2006	24.2379	-0.092759	0.256849	0.349608	0.551397
0	12	1637	9	13.0218	24.9778	-0.1415	0.33941	0.48091	0.657563
0	12	1638	9	12.9647	24.8632	-0.121248	0.0698401	0.191088	0.62617
0	12	1639	9	12.4578	23.7981	-0.114156	0.0875778	0.201734	0.529191
0	12	1640	9	13.0075	24.3635	-0.144964	0.143614	0.288578	0.452734
0	12	1641	9	12.2568	25.2929	-0.0219962	0.33254	0.354536	0.724786
0	12	1642	9	12.9575	25.6931	0.06907	0.15134	0.0822698	0.415869
0	12	1643	9	13.0387	23.6953	-0.0645182	0.172724	0.237242	0.469393
0	12	1644	9	12.1604	23.87	-0.0616493	0.154563	0.216212	0.357223
0	12	1645	9	11.9723	25.2297	-0.015798	0.393749	0.409547	0.512815
0	12	1646	9	13.099	24.3795	-0.114569	0.145945	0.260514	0.573633
0	12	1647	9	12.1374	23.6484	-0.0360215	0.143813	0.179834	0.448739
0	12	1648	9	13.2573	23.9759	0.156456	0.357475	0.201019	0.42397
0	12	1649	9	12.6622	24.4889	0.0751034	0.338996	0.263893	0.450261
0	12	1650	9	14.0416	25.9403	0.0785864	0.322942	0.244355	0.247934
0	12	1651	9	13.0981	24.6125	0.00341337	0.321578	0.318164	0.575964
0	12	1652	9	13.5281	24.9061	0.120651	0.187799	0.0671483	0.490448
0	12	1653	9	12.4566	24.9069	0.197744	0.347781	0.150037	0.412431
0	12	1654	9	13.4341	24.891	-0.195954	0.201098	0.397052	0.574858
0	12	1655	9	12.1955	24.8108	-0.0685339	0.108054	0.176588	0.406693
0	12	1656	9	12.741	23.873	0.318192	0.339026	0.0208337	0.32861
0	12	1657	9	13.8066	24.7351	0.0284294	0.152974	0.124544	0.316846
0	12	1658	9	12.206	24.3716	0.107631	0.11913	0.0114987	0.304943
0	12	1659	9	13.7713	23.9191	0.103211	0.24947	0.146259	0.345751
0	12	1660	9	12.8113	24.4529	-0.0810541	0.177966	0.25902	0.658674
0	12	1661	9	13.0205	24.0651	-0.155438	0.185203	0.340641	0.58653
0	12	1662	9	13.1221	23.5369	-0.151336	0.330828	0.482164	0.652915
0	12	1663	9	12.791	23.8842	-0.120052	0.248666	0.368718	0.605376
0	12	1664	9	13.0507	24.2987	-0.0542912	0.222447	0.276738	0.440744
0	12	1665	9	14.2704	25.9689	0.0306762	0.386713	0.356037	0.437708
0	12	1666	9	12.5096	23.9795	0.0165816	0.284019	0.267437	0.609632
0	12	1667	9	12.9234	25.5066	0.31663	0.39519	0.0785599	0.263684
0	12	1668	9	13.4484	24.1036	0.179115	0.280499	0.101384	0.242213
0	12	1669	9	11.9578	24.2344	0.206701	0.193258	-0.0134432	0.296972
0	12	1670	9	13.4777	25.4854	0.0896	0.263677	0.174077	0.392848
0	12	1671	9	13.0279	25.8824	0.156443	0.30617	0.149727	0.299866
0	12	1672	9	12.7803	25.1357	0.212126	0.226059	0.0139329	0.246028
0	12	1673	9	14.2441	23.7103	0.0925254	0.613038	0.520512	0.667725
0	12	1674	9	11.9844	25.5155	-0.230993	0.31536	0.546354	0.770826
0	12	1675	9	13.6452	25.0578	0.166618	0.171724	0.00510633	0.569737
0	12	1676	9	12.9304	24.5159	-0.150064	0.172263	0.322327	0.64941
0	12	1677	9	13.5588	24.2801	-0.0439645	0.212883	0.256848	0.475875
0	12	1678	9	13.7933	24.117	0.286872	0.412949	0.126077	0.41718
0	12	1679	9	13.2703	23.9457	-0.00743766	0.244303	0.251741	0.557778
0	12	1680	9	13.5322	25.1079	-0.0232078	0.340188	0.363396	0.411738
0	12	1681	9	12.0642	23.6563	-0.114925	0.289366	0.40429	0.552891
0	12	1682	9	12.7681	24.0607	0.0852324	0.226587	0.141355	0.321191
0	12	1683	9	13.1373	24.7345	0.00411105	0.150388	0.146277	0.475847
0	12	1684	9	13.4067	25.0765	-0.0203154	0.517135	0.53745	0.499436
0	12	1685	9	12.2131	24.3682	0.362404	0.369575	0.00717052	0.232126
0	12	1686	9	13.7854	25.3774	-0.0497028	0.168525	0.218228	0.496682
0	12	1687	9	12.7626	24.7979	0.0567513	0.331359	0.274608	0.314554
0	12	1688	9	11.9321	24.5967	-0.122758	0.133693	0.256451	0.486757
0	12	1689	9	12.3192	25.4398	-0.265177	0.202438	0.467614	0.978571
0	12	1690	9	12.6568	25.5679	-0.0970762	0.282729	0.379805	0.581211
0	12	1691	9	12.6332	23.9111	0.00931137	0.204705	0.195394	0.431316
0	12	1692	9	12.3138	23.6849	0.0519739	0.235097	0.183123	0.530502
0	12	1693	9	11.9834	25.4137	-0.0568134	0.361261	0.418074	0.530955
0	12	1694	9	13.7442	24.5297	-0.107425	0.240481	0.347906	0.560357
0	12	1695	9	13.366	23.9541	0.0458197	0.0486914	0.00287166	0.334892
0	12	1696	9	12.4218	24.9478	-0.172549	0.303898	0.476448	0.650765
0	12	1697	9	13.1844	23.8606	0.14753	0.218002	0.0704723	0.252597
0	12	1698	9	12.2534	25.1156	-0.0210721	0.0750412	0.0961133	0.42375
0	12	1699	9	13.4293	24.5409	-0.0765454	0.22177	0.298315	0.487966
0	12	1700	9	12.144	24.543	0.167267	0.27996	0.112693	0.227496
0	12	1701	9	13.856	24.1887	-0.15047	0.106264	0.256734	0.409698
0	12	1702	9	11.9778	25.1275	-0.173183	0.139545	0.312728	0.496187
0	12	1703	9	11.9551	24.0044	-0.0684049	0.0977468	0.166152	0.292555
0	12	1704	9	12.8452	25.1447	-0.150428	0.159645	0.310073	0.315625
0	12	1705	9	11.8662	24.5185	-0.0556966	0.203929	0.259626	0.510753
0	12	1706	9	12.4454	24.3916	-0.0989883	0.160664	0.259653	0.470152
0	12	1707	9	12.6267	25.4822	0.046402	0.153227	0.106825	0.318721
0	12	1708	9	12.2176	23.5708	-0.200472	0.176875	0.377348	0.527694
0	12	1709	9	13.4019	24.0965	0.176764	0.217522	0.0407575	0.263522
0	12	1710	9	12.8959	25.6581	0.0801244	0.376886	0.296761	0.40897
0	12	1711	9	13.8597	23.8935	-0.0695188	0.216633	0.286152	0.41419
0	12	1712	9	13.548	25.858	0.233898	0.303985	0.0700877	0.175068
0	12	1713	9	11.9851	25.2249	0.0185404	0.24844	0.229899	0.348148
0	12	1714	9	13.2051	25.8148	-0.12075	0.200931	0.321681	0.394252
0	12	1715	9	13.1662	23.8402	-0.121206	0.240011	0.361217	0.565266
0	12	1716	9	12.8396	24.4634	0.0961178	0.275783	0.179666	0.293273
0	12	1717	9	13.8535	24.4318	0.0521757	0.193036	0.14086	0.537437
0	12	1718	9	12.2193	23.6639	0.0027667	0.117739	0.114973	0.290654
0	12	1719	9	13.1255	24.0787	0.0151318	0.327479	0.312347	0.310814
0	12	1720	9	12.1186	24.7522	-0.125632	0.26081	0.386441	0.44509
0	12	1721	9	13.6352	24.7586	0.14558	0.201963	0.0563827	0.260129
0	12	1722	9	12.4835	25.5946	-0.129112	0.323087	0.452199	0.401329
0	12	1723	9	12.5686	23.5913	-0.0884698	0.129942	0.218412	0.337248
0	12	1724	9	12.0146	24.6695	-0.0700062	0.0949745	0.164981	0.387192
0	12	1725	9	12.6272	25.0348	0.0610574	0.182764	0.121707	0.269013
0	12	1726	9	13.7178	23.8041	0.0304515	0.143215	0.112763	0.317816
0	12	1727	9	12.698	24.9598	-0.196794	0.227429	0.424223	0.500838
0	12	1728	9	12.413	25.0045	-0.0810852	0.142863	0.223948	0.389981
0	12	1729	9	13.8987	24.7395	-0.232378	0.143838	0.376217	0.505358
0	12	1730	9	13.0123	24.1229	-0.016917	0.144565	0.161482	0.350063
0	12	1731	9	13.7501	24.175	0.0604764	0.194885	0.134409	0.261592
0	12	1732	9	14.0118	25.1469	-0.0227391	0.339265	0.362004	0.383496
0	12	1733	9	12.9665	24.6666	0.116847	0.285188	0.168341	0.219186
0	12	1734	9	13.0387	24.6067	-0.00089785	0.253058	0.253956	0.255343
0	12	1735	9	12.7633	24.2975	-0.164954	0.22932	0.394275	0.452429
0	12	1736	9	12.5455	24.1834	0.0803858	0.423336	0.34295	0.331958
0	12	1737	9	12.4626	24.9987	-0.263533	0.56805	0.831582	0.592062
0	12	1738	9	11.9313	24.0246	-0.0103015	0.394015	0.404317	0.295522
0	12	1739	9	13.1555	24.8379	-0.139931	0.195982	0.335913	0.336223
0	12	1740	9	12.4557	25.1257	-0.0432377	0.341771	0.385009	0.322133
0	12	1741	9	13.0074	24.7625	-0.0315658	0.245718	0.277284	0.384703
0	12	1742	9	12.3697	24.842	0.0290923	0.275933	0.24684	0.230336
0	12	1743	9	12.7359	23.6369	-0.267492	0.0321543	0.299646	0.43876
0	12	1744	9	12.1977	25.2855	-0.217736	0.212986	0.430721	0.488681
0	12	1745	9	11.6302	24.9733	0.00890903	0.415317	0.406408	0.522222
0	12	1746	9	13.1962	25.2358	0.0565237	0.448822	0.392298	0.509571
0	12	1747	9	13.1764	25.1974	0.0563204	0.420094	0.363774	0.475032
0	12	1748	9	12.2825	24.7578	-0.092746	0.12152	0.214266	0.482263
0	12	1749	9	12.3126	24.2172	-0.0583401	0.211861	0.270202	0.530236
0	12	1750	9	12.5251	25.3083	0.1758	0.382077	0.206277	0.212147
0	12	1751	9	12.9207	23.4845	0.175746	0.316306	0.14056	0.291831
0	12	1752	9	12.8646	25.3605	0.0423109	0.270093	0.227782	0.252005
0	12	1753	9	13.4825	24.1718	-0.0259239	0.320342	0.346266	0.407004
0	12	1754	9	12.6094	24.9032	0.161883	0.334326	0.172443	0.308592
0	12	1755	9	12.9262	25.6856	0.0292574	0.328398	0.29914	0.233596
0	12	1756	9	12.3258	23.857	0.0631293	0.213377	0.150248	0.315609
0	12	1757	9	13.2144	25.7395	-0.00216628	0.26481	0.266976	0.433138
0	12	1758	9	14.0232	24.0575	0.207918	0.100696	-0.107222	0.146817
0	12	1759	9	12.3179	25.2015	0.0557919	0.0786513	0.0228594	0.401672
0	12	1760	9	13.6132	25.4956	-0.105373	0.0580032	0.163376	0.573107
0	13	1761	6	12.6889	23.9633	0.0163584	0.220214	0.203856	0.483494
0	13	1761	9	12.6889	23.9633	-0.0662923	0.276373	0.342665	0.403411
0	13	1762	6	11.5456	23.2356	0.0832265	0.114621	0.0313942	0.389161
0	13	1762	9	11.5456	23.2356	-0.00907476	0.183145	0.192219	0.419076
0	13	1763	6	11.5492	23.4086	0.00340618	0.187064	0.183657	0.606932
0	13	1763	9	11.5492	23.4086	-0.152652	0.197503	0.350155	0.617666
0	13	1764	6	11.3338	23.6786	0.139826	0.233583	0.0937575	0.333619
0	13	1764	9	11.3338	23.6786	0.00796533	0.179301	0.171336	0.320713
0	13	1765	6	12.947	24.1603	-0.095857	0.390404	0.486261	0.583129
0	13	1765	9	12.947	24.1603	-0.226836	0.385142	0.611978	0.540513
0	13	1766	6	12.6866	24.5811	-0.103283	0.222899	0.326182	0.518159
0	13	1766	9	12.6866	24.5811	-0.0964987	0.351619	0.448117	0.491844
0	13	1767	6	13.4849	23.6921	-0.0879489	0.170817	0.258765	0.568219
0	13	1767	9	13.4849	23.6921	-0.0848225	0.211807	0.296629	0.479429
0	13	1768	6	12.0303	24.1502	0.0394985	0.268951	0.229452	0.455027
0	13	1768	9	12.0303	24.1502	-0.0423165	0.356461	0.398777	0.415502
0	13	1769	6	12.783	23.1932	-0.0343685	0.185841	0.220209	0.481072
0	13	1769	9	12.783	23.1932	-0.0644184	0.0560402	0.120459	0.353553
0	13	1770	6	12.898	24.2512	-0.179669	0.07612	0.255789	0.615178
0	13	1770	9	12.898	24.2512	-0.120568	0.153405	0.273973	0.514019
0	13	1771	6	12.0769	23.6145	0.230744	0.178609	-0.0521353	0.333706
0	13	1771	9	12.0769	23.6145	0.161754	0.232546	0.0707924	0.278536
0	13	1772	6	12.1372	24.2746	0.0226486	0.22281	0.200161	0.614017
0	13	1772	9	12.1372	24.2746	0.0967113	0.410145	0.313434	0.583117
0	13	1773	6	12.2668	23.9524	0.00282984	0.134055	0.131225	0.522504
0	13	1773	9	12.2668	23.9524	0.0839096	0.232211	0.148301	0.345347
0	13	1774	9	12.0717	24.9083	0.0851779	0.413127	0.327949	0.429649
0	13	1775	6	13.402	23.4473	-0.059548	0.127065	0.186613	0.586984
0	13	1775	9	13.402	23.4473	-0.0570662	0.0289598	0.086026	0.428355
0	13	1776	6	12.8074	24.2337	-0.0849638	0.181364	0.266328	0.704314
0	13	1776	9	12.8074	24.2337	-0.108215	0.20774	0.315955	0.456246
0	13	1777	6	12.4818	23.2239	-0.144507	0.263018	0.407525	0.594877
0	13	1777	9	12.4818	23.2239	-0.0396617	0.273399	0.313061	0.414413
0	13	1778	6	12.9097	23.4553	-0.0522346	0.130592	0.182826	0.511137
0	13	1778	9	12.9097	23.4553	-0.0226668	0.21094	0.233607	0.365575
0	13	1779	6	11.0189	23.5065	0.139236	0.129363	-0.00987282	0.350584
0	13	1779	9	11.0189	23.5065	0.182031	0.164095	-0.0179366	0.238582
0	13	1780	6	12.0376	24.1541	-0.0699407	0.119112	0.189053	0.765462
0	13	1780	9	12.0376	24.1541	-0.041511	0.213142	0.254653	0.613855
0	13	1781	6	12.018	24.8457	-0.0920189	0.141039	0.233058	0.5236
0	13	1781	9	12.018	24.8457	0.0998855	0.164048	0.0641627	0.429158
0	13	1782	9	12.8579	25.1253	-0.0204954	0.160966	0.181461	0.557214
0	13	1783	6	11.4629	24.4677	0.0404424	0.114091	0.073649	0.499053
0	13	1783	9	11.4629	24.4677	-0.0316029	0.141625	0.173227	0.503169
0	13	1784	6	13.1612	24.1044	0.0135076	0.131498	0.11799	0.53269
0	13	1784	9	13.1612	24.1044	0.0503042	0.190273	0.139969	0.355046
0	13	1785	6	12.4898	24.2636	0.0647245	0.149443	0.0847189	0.484778
0	13	1785	9	12.4898	24.2636	0.326308	0.325191	-0.00111676	0.387365
0	13	1786	6	12.3867	23.9091	0.0366828	0.222139	0.185457	0.473836
0	13	1786	9	12.3867	23.9091	-0.0760028	0.171727	0.24773	0.499606
0	13	1787	6	11.5604	24.4858	0.266286	0.168032	-0.0982547	0.218815
0	13	1787	9	11.5604	24.4858	0.217497	0.181543	-0.0359547	0.195562
0	13	1788	6	12.3137	23.3656	-0.0787436	0.155033	0.233777	0.535966
0	13	1788	9	12.3137	23.3656	-0.0479217	0.0785019	0.126424	0.32456
0	13	1789	6	12.5633	23.7968	-0.0493217	0.0838244	0.133146	0.482599
0	13	1789	9	12.5633	23.7968	-0.0811037	0.0895059	0.17061	0.375075
0	13	1790	6	12.7767	23.6908	-0.106667	0.128603	0.23527	0.573896
0	13	1790	9	12.7767	23.6908	-0.122161	0.0944445	0.216606	0.480046
0	13	1791	6	12.4077	23.7971	-0.0468682	0.133886	0.180754	0.468396
0	13	1791	9	12.4077	23.7971	0.187711	0.284168	0.0964575	0.182185
0	13	1792	6	12.6254	24.0336	0.0585791	0.204338	0.145759	0.371024
0	13	1792	9	12.6254	24.0336	0.124372	0.133986	0.00961421	0.171324
0	13	1793	6	12.4341	25.1049	-0.170179	0.0976665	0.267846	0.614875
0	13	1793	9	12.4341	25.1049	-0.121664	0.150076	0.271739	0.478234
0	13	1794	6	12.8988	23.9287	-0.0772612	0.141792	0.219053	0.567009
0	13	1794	9	12.8988	23.9287	-0.0667416	0.146447	0.213188	0.573436
0	13	1795	6	13.0166	24.0646	-0.00194556	0.210641	0.212586	0.606825
0	13	1795	9	13.0166	24.0646	0.0342788	0.227404	0.193125	0.553146
0	13	1796	6	12.4687	23.9951	0.0246046	0.0192643	-0.00534035	0.428104
0	13	1796	9	12.4687	23.9951	-0.0379024	-0.0466907	-0.00878828	0.263324
0	13	1797	6	12.4483	24.7742	-0.0681805	0.131144	0.199325	0.51174
0	13	1797	9	12.4483	24.7742	-0.0795383	0.177897	0.257435	0.430943
0	13	1798	6	13.2994	25.2444	-0.063201	0.110438	0.173639	0.60595
0	13	1798	9	13.2994	25.2444	-0.0453813	0.182839	0.22822	0.476524
0	13	1799	6	13.2682	23.9234	-0.077574	0.189942	0.267516	0.402196
0	13	1799	9	13.2682	23.9234	-0.121466	0.21771	0.339176	0.376298
0	13	1800	6	12.0012	25.0753	0.054505	0.108225	0.0537195	0.540678
0	13	1800	9	12.0012	25.0753	0.0477681	0.290236	0.242468	0.591847
0	13	1801	6	11.9779	24.0082	0.0822967	0.106535	0.0242387	0.486915
0	13	1801	9	11.9779	24.0082	0.0899998	0.144049	0.0540496	0.392574
0	13	1802	6	12.448	24.7885	-0.0383301	0.205738	0.244068	0.569004
0	13	1802	9	12.448	24.7885	0.281973	0.296157	0.0141846	0.175749
0	13	1803	6	11.9051	25.2483	0.110381	0.243017	0.132635	0.477304
0	13	1803	9	11.9051	25.2483	0.212631	0.311693	0.0990612	0.260766
0	13	1804	6	12.4721	25.2034	-0.0451613	0.176961	0.222122	0.575443
0	13	1804	9	12.4721	25.2034	0.0225772	0.438736	0.416159	0.506501
0	13	1805	6	13.099	24.5676	-0.102973	0.147978	0.250952	0.599074
0	13	1805	9	13.099	24.5676	-0.121559	0.278877	0.400436	0.575546
0	13	1806	6	11.4429	24.6513	0.0179575	0.161438	0.143481	0.601714
0	13	1806	9	11.4429	24.6513	-0.105478	0.140805	0.246282	0.67036
0	13	1807	6	12.6848	23.5443	-0.10554	0.130365	0.235905	0.590529
0	13	1807	9	12.6848	23.5443	-0.0254514	0.311176	0.336627	0.533149
0	13	1808	6	12.3766	24.8913	-0.0647178	0.240303	0.305021	0.635235
0	13	1808	9	12.3766	24.8913	-0.0859518	0.27148	0.357432	0.621689
0	13	1809	6	11.3707	24.0977	0.0276679	0.115809	0.0881414	0.543863
0	13	1809	9	11.3707	24.0977	-0.0884667	0.0969032	0.18537	0.445868
0	13	1810	6	11.3913	24.576	0.149069	0.195069	0.0459998	0.464079
0	13	1810	9	11.3913	24.576	0.337583	0.330919	-0.00666407	0.251915
0	13	1811	6	13.056	24.1973	0.0131084	0.133588	0.120479	0.59459
0	13	1811	9	13.056	24.1973	0.0758289	0.195297	0.119468	0.495167
0	13	1812	6	11.9903	23.6187	0.0726766	0.217399	0.144723	0.447155
0	13	1812	9	11.9903	23.6187	0.0164357	0.19425	0.177814	0.339446
0	13	1813	6	13.1507	24.2248	-0.0365805	0.112369	0.14895	0.469972
0	13	1813	9	13.1507	24.2248	-0.0254772	0.138939	0.164417	0.367352
0	13	1814	6	13.6346	23.3756	0.0516888	0.177061	0.125372	0.390792
0	13	1814	9	13.6346	23.3756	0.0936179	0.20302	0.109402	0.228785
0	13	1815	6	11.8755	23.68	-0.179895	0.100713	0.280608	0.557733
0	13	1815	9	11.8755	23.68	-0.179448	0.176594	0.356043	0.512625
0	13	1816	6	13.5149	25.1987	0.0244677	0.206915	0.182447	0.351053
0	13	1816	9	13.5149	25.1987	-0.125366	0.327547	0.452913	0.459726
0	13	1817	9	11.5092	24.5454	-0.201771	0.239745	0.441516	0.514843
0	13	1818	6	12.9065	24.1892	0.399472	0.135406	-0.264066	-0.0740872
0	13	1818	9	12.9065	24.1892	0.335444	0.246905	-0.0885397	0.0383598
0	13	1819	6	11.2542	24.0335	0.0519621	0.114863	0.0629012	0.410967
0	13	1819	9	11.2542	24.0335	0.0407321	0.229035	0.188303	0.373452
0	13	1820	6	12.8102	24.1891	0.160075	0.138875	-0.0211991	0.480584
0	13	1820	9	12.8102	24.1891	0.250328	0.207784	-0.0425437	0.36075
0	13	1821	6	12.1077	24.3306	-0.0285441	0.134317	0.162861	0.523735
0	13	1821	9	12.1077	24.3306	0.0325914	0.186184	0.153593	0.344194
0	13	1822	6	13.2844	24.7894	-0.123238	0.218742	0.341981	0.777944
0	13	1822	9	13.2844	24.7894	-0.153827	0.15015	0.303976	0.608086
0	13	1823	9	13.4675	25.4623	-0.109696	0.360597	0.470293	0.611984
0	13	1824	6	12.7373	23.7001	0.0669228	0.124663	0.0577402	0.442994
0	13	1824	9	12.7373	23.7001	0.245309	0.324122	0.0788132	0.241722
0	13	1825	6	12.6078	24.5862	0.0278194	0.177861	0.150042	0.352282
0	13	1825	9	12.6078	24.5862	0.0886617	0.33082	0.242158	0.411389
0	13	1826	6	12.0605	23.4215	0.299119	0.136778	-0.162341	0.236126
0	13	1827	6	12.1166	23.5735	-0.0989527	0.218757	0.31771	0.559807
0	13	1827	9	12.1166	23.5735	-0.0758816	0.21279	0.288672	0.399015
0	13	1828	6	12.2975	24.1862	-0.138956	0.00421044	0.143167	0.577824
0	13	1829	9	13.2788	23.5888	-0.0208817	0.211886	0.232767	0.470386
0	13	1830	6	11.112	24.3681	-0.0390822	0.0256025	0.0646847	0.4514
0	13	1830	9	11.112	24.3681	-0.0300644	0.173966	0.20403	0.494169
0	13	1831	6	13.4257	23.4464	-0.0152979	0.0391308	0.0544287	0.371477
0	13	1831	9	13.4257	23.4464	0.118386	0.0312651	-0.0871214	0.210457
0	13	1832	6	11.185	23.3039	-0.0302387	0.0896416	0.11988	0.433613
0	13	1832	9	11.185	23.3039	-0.0347947	0.0767459	0.111541	0.377399
0	13	1833	9	12.3767	24.0917	-0.202338	0.249004	0.451342	0.636611
0	13	1834	9	11.8353	24.9824	-0.0298933	0.131193	0.161086	0.352603
0	13	1835	9	13.5476	25.3203	-0.203962	0.339605	0.543567	0.490378
0	13	1836	9	12.7743	24.1721	-0.0979156	0.221169	0.319085	0.416702
0	13	1837	9	12.0475	23.5088	0.0160067	0.165446	0.149439	0.490078
0	13	1838	9	12.0261	24.1346	-0.0152735	0.187814	0.203087	0.593831
0	13	1839	9	11.815	23.521	0.126674	0.1965	0.0698261	0.272617
0	13	1840	9	12.0991	23.1549	0.0511908	0.259346	0.208155	0.496664
0	13	1841	9	13.0289	23.7966	-0.117377	0.178729	0.296106	0.424898
0	13	1842	9	12.2045	24.3735	-0.084451	0.188856	0.273307	0.4895
0	13	1843	9	11.7921	23.7875	-0.0469474	0.297654	0.344602	0.556719
0	13	1844	9	11.9306	24.0024	-0.0539325	0.0901323	0.144065	0.338756
0	13	1845	9	12.8362	23.78	-0.0627716	0.139886	0.202657	0.408882
0	13	1846	9	13.0734	25.036	-0.0735755	0.263998	0.337574	0.490283
0	13	1847	9	11.4032	24.8426	0.161825	0.17309	0.0112643	0.219051
0	13	1848	9	12.1875	24.9295	-0.152613	0.280711	0.433325	0.648222
0	13	1849	9	13.2473	25.4173	0.00158673	0.449085	0.447499	0.826777
0	13	1850	9	11.6443	23.8357	-0.0768007	0.166772	0.243572	0.651994
0	13	1851	9	12.5008	24.967	0.0576431	0.216555	0.158912	0.490752
0	13	1852	9	13.1078	25.2245	-0.205416	0.187217	0.392633	0.58676
0	13	1853	9	12.7984	24.5322	-0.0107919	0.11621	0.127002	0.58485
0	13	1854	9	13.2733	23.6987	0.0317999	0.356005	0.324205	0.468538
0	13	1855	9	12.2048	23.7377	0.232658	0.369135	0.136476	0.461264
0	13	1856	9	12.9678	25.0719	0.0381753	0.319095	0.280919	0.405838
0	13	1857	9	12.1137	23.394	0.0879994	0.251588	0.163589	0.309428
0	13	1858	9	12.5382	23.5291	0.0335713	0.371501	0.33793	0.56065
0	13	1859	9	12.6585	25.5627	-0.0477267	0.455348	0.503075	0.651047
0	13	1860	9	12.56	24.7113	0.0936129	0.282034	0.188421	0.433294
0	13	1861	9	11.8723	24.0767	0.052361	0.185321	0.13296	0.408814
0	13	1862	9	12.5941	24.4304	0.13418	0.196823	0.0626426	0.334495
0	13	1863	9	12.744	24.0362	0.042433	0.140757	0.098324	0.394955
0	13	1864	9	12.2883	24.2609	0.265615	0.204055	-0.0615593	0.162162
0	13	1865	9	11.6959	24.501	0.195422	0.350778	0.155356	0.360946
0	13	1866	9	13.0374	23.9501	0.0232921	0.414568	0.391276	0.703089
0	13	1867	9	12.0158	24.0589	-0.0634503	0.277473	0.340924	0.523142
0	13	1868	9	12.6042	23.2938	0.00887895	0.448502	0.439623	0.827962
0	13	1869	9	12.351	23.488	-0.0794739	0.0815932	0.161067	0.460254
0	13	1870	9	12.9695	23.373	-0.0602688	0.0911853	0.151454	0.594233
0	13	1871	9	12.7178	23.7353	-0.108964	0.275463	0.384427	0.721654
0	13	1872	9	11.7249	24.1003	0.157436	0.308865	0.151429	0.27497
0	13	1873	9	11.9181	23.1316	-0.0810665	0.213287	0.294354	0.49755
0	13	1874	9	12.8872	23.3468	0.11485	0.168537	0.0536861	0.52626
0	13	1875	9	13.6233	24.0898	0.179669	0.2368	0.0571317	0.347561
0	13	1876	9	13.2099	23.3838	0.0819027	0.237388	0.155485	0.360766
0	13	1877	9	11.2794	25.1883	0.0601322	0.30669	0.246557	0.532072
0	13	1878	9	11.3307	23.9197	0.0131918	0.162911	0.149719	0.468972
0	13	1879	9	12.51	23.7965	-0.0861642	0.173201	0.259365	0.566544
0	13	1880	9	12.9944	24.3255	-0.0426687	0.1001	0.142769	0.566992
0	13	1881	9	12.2111	24.1179	0.064411	0.21543	0.151018	0.35936
0	13	1882	9	12.1085	23.2078	-0.0776587	0.324564	0.402222	0.754338
0	13	1883	9	12.8963	24.5219	-0.165275	0.0849103	0.250185	0.540626
0	13	1884	9	12.591	23.1321	0.196322	0.252154	0.0558321	0.417641
0	13	1885	9	13.7714	23.4653	0.147539	0.279658	0.132119	0.324009
0	13	1886	9	12.5578	23.8659	-0.0653428	0.193352	0.258694	0.632734
[truncated: 23,814 more rows]
