# Supplementary material for: Postural control of arm and fingers through integration of movement commands
Source: eLife. 2020 Feb 11;9:e52507. doi: 10.7554/eLife.52507 (PMC7062460; doi:10.7554/eLife.52507)
Supplement: Figure 3—source data 1. — The data are divided into two tabs, ‘data-panels-B-D’ and ‘data-panels-E-G’. For the former, data are provided for all channel trials appearing in the baseline null field period for all healthy participants (n = 220). Here, we also indicate the movement duration and whether or not the arm was supported against gravity. For the latter, data are provided for force field adaptation trials for the participants shown in the corresponding figure panels (n = 32). The adaptation paradigm for these trials is shown in Figure 3E (bottom). The ‘readme’ tab describes all quantities reported in the two tabs containing participant data. [file elife-52507-fig3-data1.xlsx]

## Sheet: readme
Lead author	Scott	Albert
Title	Postural control of arm and fingers through integration of movement commands
Publication year	2020
Journal	eLife
Description	These data are reported in Figure 3 of the manuscript.
Column description (panels B-D)	Experiment number	This is an ID that refers to different types of experiments
	Subject ID	This is an ID number assigned to each participant.
	Trial number	This is the channel trial number on which the data were recorded
	Hold 2 - Hold 1 (force)	This is the difference in force measured during holding (hold 2 - hold 1) in Newtons
	Move force integral	This is the integral of force during movement, relative to hold 1 force (units are N-s)
	Duration	This is the duration of the movement (milliseconds)
	Weight support	This indicates if the arm was supported by a frictionless airsled (value of 1) or not supported (value of 0)
Column description (panels E-G)	Experiment number	This is an ID that refers to different types of experiments
	Subject ID	This is an ID number assigned to each participant.
	Force orientation	Refers to the orientation of the applied force field (0 for CCW and 1 for CW)
	Hand position	Refers to the positioning of the start position for the hand (0 in line with midline, 1 left of midline, 2 right of midline)
	Period	Refers to whether force field magnitude was gradually increasing (value of 0) or gradually decreaseing (value of 1)
	Trial number	This is the channel trial number on which the data were recorded in a given block (blocks determined by force orientation)
	Hold 2 - Hold 1 (force)	This is the difference in force measured during holding (hold 2 - hold 1) in Newtons
	Move force integral	This is the integral of force during movement, relative to hold 1 force (units are N-s)

## Sheet: data-panels-B-through-D
Experiment number	Subject ID	Trial number	Hold 2 - Hold 1 (force)	Move force integral	Duration	Weight support
1	1	1	-0.215905	-0.00590175	485	0
1	1	2	-0.428697	-0.167412	570	0
1	1	3	0.695478	0.0613624	450	0
1	1	4	-0.0806893	0.0697036	430	0
1	1	5	-0.525236	-0.0926182	430	0
1	1	6	-0.401272	-0.155255	495	0
1	1	7	0.720751	-0.0556796	475	0
1	1	8	0.0669732	0.118014	440	0
1	1	9	0.686156	0.113254	480	0
1	1	10	-0.505215	-0.0337513	495	0
1	2	1	0.0391641	0.0646186	640	0
1	2	2	-0.164449	0.0483561	650	0
1	2	3	-0.574476	-0.0854027	530	0
1	2	4	-0.177973	0.0824454	585	0
1	2	5	0.151422	0.136763	510	0
1	2	6	0.469139	0.019685	550	0
1	2	7	NaN	NaN	510	0
1	2	8	0.0244476	-0.0612814	525	0
1	2	9	-0.0818999	0.145187	535	0
1	2	10	0.721498	-0.118689	560	0
1	3	1	0.233047	0.0867453	530	0
1	3	2	0.225455	-0.173809	535	0
1	3	3	-0.554482	0.0597866	640	0
1	3	4	-0.698615	-0.198557	635	0
1	3	5	0.602059	0.0193471	615	0
1	3	6	0.141482	-0.324761	660	0
1	3	7	0.175386	0.138022	665	0
1	3	8	-0.0927324	-0.0972893	575	0
1	3	9	-0.375326	0.0218699	805	0
1	3	10	0.396219	0.322333	690	0
1	4	1	-0.512925	-0.281384	545	0
1	4	2	-0.0423717	-0.0668173	435	0
1	4	3	0.0573248	0.395495	485	0
1	4	4	0.0845589	-0.0798894	435	0
1	4	5	-0.0267021	-0.0680307	510	0
1	4	6	-0.386825	-0.0796227	610	0
1	4	7	0.115011	-0.102491	550	0
1	4	8	0.00343726	-0.0689449	725	0
1	4	9	0.410309	0.13386	725	0
1	4	10	0.651948	0.244534	495	0
1	5	1	0.454375	0.121965	535	0
1	5	2	-0.0410185	0.0141992	535	0
1	5	3	0.309547	-0.048736	500	0
1	5	4	-0.0591074	-0.122128	530	0
1	5	5	0.0903655	0.0189757	615	0
1	5	6	-0.294746	-0.138525	585	0
1	5	7	-0.22316	0.0128799	600	0
1	5	8	-0.321806	0.0601171	560	0
1	5	9	-0.0823431	0.0673288	665	0
1	5	10	0.208944	-0.00679936	510	0
1	6	1	-0.201128	-0.16278	485	0
1	6	2	0.171917	0.178476	455	0
1	6	3	0.153125	-0.0737124	485	0
1	6	4	0.488572	0.0751901	500	0
1	6	5	0.326905	0.0411165	525	0
1	6	6	0.0564563	-0.0830993	510	0
1	6	7	-0.906395	-0.107493	525	0
1	6	8	-0.684116	-0.224769	555	0
1	6	9	0.217444	0.337843	500	0
1	6	10	0.415822	-0.0843186	660	0
1	7	1	0.437331	-0.0471528	460	0
1	7	2	0.0507262	-0.00491621	430	0
1	7	3	0.192237	0.0332616	375	0
1	7	4	-0.194906	-0.12651	350	0
1	7	5	-0.252009	-0.0103918	345	0
1	7	6	-0.0165656	-0.0301023	380	0
1	7	7	-0.364877	0.0860846	360	0
1	7	8	0.359472	0.0646889	400	0
1	7	9	-0.473718	-0.0410432	405	0
1	7	10	0.257561	0.016805	420	0
2	8	1	0.0343874	-0.126193	570	0
2	8	2	0.00895328	0.000435857	540	0
2	8	3	0.480896	-0.177428	655	0
2	8	4	0.618063	0.114937	575	0
2	8	5	0.0154585	0.174404	630	0
2	8	6	-0.215761	-0.172992	540	0
2	8	7	-0.33385	0.0420877	590	0
2	8	8	-0.0651333	0.247677	610	0
2	8	9	-0.0961266	-0.0963124	645	0
2	8	10	-0.471588	-0.00295728	605	0
2	9	1	-1.33525	-0.724604	650	0
2	9	2	-0.235931	0.0348028	545	0
2	9	3	-0.213662	0.202606	545	0
2	9	4	0.897261	0.137025	665	0
2	9	5	-0.299617	-0.0662734	580	0
2	9	6	0.111652	0.0512405	515	0
2	9	7	0.430332	0.308664	590	0
2	9	8	0.464217	0.268794	625	0
2	9	9	-0.214501	-0.195408	795	0
2	9	10	0.360718	-0.128896	540	0
2	10	1	-0.424565	0.130283	595	0
2	10	2	-0.143296	-0.234236	670	0
2	10	3	-0.221598	-0.1097	550	0
2	10	4	0.0554114	0.177625	590	0
2	10	5	0.168416	0.0109092	665	0
2	10	6	0.58871	0.0722605	510	0
2	10	7	-0.145347	0.0687849	600	0
2	10	8	-0.253519	-0.272686	465	0
2	10	9	0.341082	0.16782	480	0
2	10	10	0.13957	-0.0731692	590	0
2	11	1	0.464689	-0.0928605	470	0
2	11	2	0.801003	0.108108	430	0
2	11	3	-0.686656	-0.160241	440	0
2	11	4	0.161087	0.119538	505	0
2	11	5	0.00210452	0.0919514	445	0
2	11	6	0.343609	0.0998359	505	0
2	11	7	-0.479218	-0.0924363	440	0
2	11	8	-0.602015	-0.0283239	500	0
2	11	9	-0.127546	0.0259461	520	0
2	11	10	0.136602	-0.104237	440	0
2	12	1	-0.0953195	0.0402937	675	0
2	12	2	-0.268797	0.00789607	660	0
2	12	3	0.463465	-0.0212897	495	0
2	12	4	-0.599602	0.0204406	490	0
2	12	5	0.0453564	0.0798388	570	0
2	12	6	0.91457	0.047183	385	0
2	12	7	0.627061	-0.158764	530	0
2	12	8	-0.00730659	0.0265554	560	0
2	12	9	-0.616045	-0.0463054	385	0
2	12	10	-0.403921	-0.156281	430	0
2	13	1	-0.644244	-0.226932	490	0
2	13	2	-0.462125	-0.289512	645	0
2	13	3	0.445856	-0.0751009	585	0
2	13	4	0.310521	0.0385508	520	0
2	13	5	0.799764	0.127416	605	0
2	13	6	0.282289	0.361048	495	0
2	13	7	0.236081	-0.00478097	435	0
2	13	8	-0.889587	-0.265917	455	0
2	13	9	-0.350008	-0.0153362	500	0
2	13	10	0.115738	0.13657	540	0
2	14	1	0.408903	0.302535	615	0
2	14	2	0.0972808	-0.0263326	650	0
2	14	3	-0.655553	-0.375591	775	0
2	14	4	-0.229052	-0.343514	650	0
2	14	5	0.107373	-0.259553	420	0
2	14	6	-0.366411	0.1178	505	0
2	14	7	-0.17374	-0.1415	505	0
2	14	8	0.019058	0.0149594	515	0
2	14	9	-0.077903	-0.0422098	495	0
2	14	10	1.21829	0.392678	510	0
2	15	1	-0.825465	-0.118616	555	0
2	15	2	0.715576	0.165895	490	0
2	15	3	0.480434	0.201327	500	0
2	15	4	-0.0270321	-0.20967	475	0
2	15	5	0.0634764	-0.0549253	770	0
2	15	6	-0.360289	0.0354825	465	0
2	15	7	-0.112088	-0.0269347	510	0
2	15	8	0.5234	-0.17015	515	0
2	15	9	-0.411814	-0.0808599	540	0
2	15	10	0.0184137	0.0220584	515	0
2	16	1	-0.0638475	-0.0902187	465	0
2	16	2	-0.0397854	-0.032516	480	0
2	16	3	0.132992	-0.157883	480	0
2	16	4	0.925941	0.122046	590	0
2	16	5	0.262443	0.00402044	640	0
2	16	6	-0.463886	-0.136959	530	0
2	16	7	-0.534835	-0.00487154	565	0
2	16	8	0.831475	0.417205	495	0
2	16	9	-0.746851	-0.275174	495	0
2	16	10	-0.335678	-4.26323e-06	640	0
2	17	1	0.736103	0.0193055	510	0
2	17	2	-0.233012	-0.306148	665	0
2	17	3	-0.0276403	0.0136498	605	0
2	17	4	-0.0169347	0.0675719	675	0
2	17	5	-0.00278475	0.124955	680	0
2	17	6	-0.511869	-0.140966	580	0
2	17	7	0.230018	0.168806	565	0
2	17	8	-0.11893	-0.0808204	500	0
2	17	9	0.358974	0.250866	545	0
2	17	10	-0.237382	-0.282523	635	0
2	18	1	-0.378735	-0.0934874	480	0
2	18	2	-0.384511	-0.0136564	450	0
2	18	3	0.228792	0.083538	640	0
2	18	4	-0.233825	-0.0416189	895	0
2	18	5	0.587424	0.0507485	600	0
2	18	6	-0.347427	-0.117548	670	0
2	18	7	-0.152741	-0.155825	730	0
2	18	8	0.232551	0.123414	540	0
2	18	9	-0.295976	-0.0556831	670	0
2	18	10	0.825308	0.158792	680	0
2	19	1	-0.396547	-0.164714	620	0
2	19	2	-0.295517	0.076332	485	0
2	19	3	-0.262294	0.220679	470	0
2	19	4	0.395035	0.0399558	425	0
2	19	5	-0.286846	-0.0655928	445	0
2	19	6	-0.225436	-0.045224	490	0
2	19	7	1.00139	0.0358959	525	0
2	19	8	-0.901668	-0.150126	475	0
2	19	9	0.912203	0.0406865	465	0
2	19	10	0.104845	-0.114902	485	0
2	20	1	-0.33911	-0.269709	595	0
2	20	2	-0.215052	-0.125184	570	0
2	20	3	0.188809	-0.00176917	560	0
2	20	4	0.956525	0.280184	675	0
2	20	5	-0.256168	-0.0489664	580	0
2	20	6	0.187953	0.273278	625	0
2	20	7	-0.28839	-0.0208144	825	0
2	20	8	-0.101706	0.0925703	750	0
2	20	9	0.215359	-0.223143	570	0
2	20	10	-0.322333	-0.029228	570	0
2	21	1	0.0701327	-0.0974509	430	0
2	21	2	-0.231376	-0.143585	510	0
2	21	3	-0.443837	0.104969	470	0
2	21	4	-0.13371	-0.0569568	660	0
2	21	5	0.446367	0.126389	475	0
2	21	6	-0.14373	-0.0576175	440	0
2	21	7	0.107652	0.034099	480	0
2	21	8	-0.506922	-0.0877252	480	0
2	21	9	0.0896777	0.096618	555	0
2	21	10	0.754582	0.00407459	505	0
2	22	1	-0.358833	0.255885	580	0
2	22	2	0.675388	-0.00152495	575	0
2	22	3	-0.236005	-0.321659	575	0
2	22	4	0.198058	0.0488237	605	0
2	22	5	-0.0554313	0.183769	465	0
2	22	6	-0.448426	-0.301946	630	0
2	22	7	-0.0292971	0.19478	620	0
2	22	8	0.607935	-0.0678383	560	0
2	22	9	-0.68953	-0.451169	610	0
2	22	10	0.32108	0.394006	715	0
3	23	1	-0.330403	-0.104566	530	0
3	23	2	0.0431065	0.0714452	490	0
3	23	3	-0.206289	-0.22328	525	0
3	23	4	-0.200489	-0.00933322	505	0
3	23	5	-0.0678523	-0.135971	470	0
3	23	6	0.455698	-0.124919	510	0
3	23	7	-0.13236	0.304331	650	0
3	23	8	0.219967	0.168932	450	0
3	23	9	0.283871	-0.0406961	490	0
3	23	10	0.0187562	0.218127	500	0
3	24	1	-0.0995872	0.0229778	670	0
3	24	2	0.00256366	-0.157114	575	0
3	24	3	-0.230766	-0.216775	630	0
3	24	4	-0.0797157	-0.122995	560	0
3	24	5	-0.349476	0.158915	725	0
3	24	6	0.486247	0.0688777	850	0
3	24	7	0.352019	0.232292	785	0
3	24	8	-0.253331	-0.076433	540	0
3	24	9	-0.182972	0.127713	760	0
3	24	10	0.0936394	0.314433	655	0
3	25	1	0.313913	0.120519	500	0
3	25	2	-0.22296	-0.153686	590	0
3	25	3	-0.00799257	0.00508348	535	0
3	25	4	-0.0960849	-0.301937	550	0
3	25	5	0.389413	0.578913	605	0
3	25	6	0.37329	0.039961	500	0
3	25	7	0.054302	-0.0337546	480	0
3	25	8	0.180084	0.0805082	640	0
3	25	9	-0.530311	-0.155747	565	0
3	25	10	-0.477279	-0.168961	500	0
3	26	1	-0.402831	-0.0874385	620	0
3	26	2	0.631527	0.291827	640	0
3	26	3	-0.454954	-0.0249345	640	0
3	26	4	-0.201914	-0.184464	635	0
3	26	5	-0.0128849	-0.203779	595	0
3	26	6	-0.147159	0.0112233	620	0
3	26	7	0.824389	0.24406	610	0
3	26	8	-0.393007	-0.119594	585	0
3	26	9	0.691439	0.313754	680	0
3	26	10	-0.570167	-0.154208	660	0
3	27	1	-0.416306	-0.230024	560	0
3	27	2	0.398888	0.194947	615	0
3	27	3	-0.428337	-0.15815	550	0
3	27	4	0.286487	0.189439	560	0
3	27	5	-0.435505	-0.296075	635	0
3	27	6	-0.0933761	0.108572	605	0
3	27	7	0.322206	-0.00247709	565	0
3	27	8	0.466173	0.271802	590	0
3	27	9	0.235812	-0.0938612	590	0
3	27	10	-0.287681	0.0477797	685	0
3	28	1	-0.0986263	0.150928	475	0
3	28	2	-1.27263	-0.558434	525	0
3	28	3	0.882922	0.100648	545	0
3	28	4	0.280528	0.128981	515	0
3	28	5	-0.463023	-0.0931387	475	0
3	28	6	0.519299	-0.176793	505	0
3	28	7	-0.177989	0.0791808	490	0
3	28	8	-0.143225	0.0168618	530	0
3	28	9	0.873086	0.376447	490	0
3	28	10	-0.384235	0.0296296	560	0
3	29	1	-0.0552065	-0.123015	570	0
3	29	2	0.433534	0.452134	655	0
3	29	3	0.167521	-0.0537173	725	0
3	29	4	-0.236963	0.0312882	630	0
3	29	5	-0.31864	-0.0745071	555	0
3	29	6	-0.368253	-0.219848	580	0
3	29	7	-0.00107511	-0.00137199	600	0
3	29	8	0.350572	0.115729	615	0
3	29	9	0.00217748	-0.00387751	565	0
3	29	10	-0.11635	-0.0118743	580	0
3	30	1	0.386961	0.0887359	435	0
3	30	2	-0.0450225	0.228366	485	0
3	30	3	0.17642	-0.00271152	445	0
3	30	4	0.0043913	-0.180293	615	0
3	30	5	-0.269265	-0.0538384	595	0
3	30	6	-0.0863352	-0.14886	515	0
3	30	7	-0.196649	0.204251	450	0
3	30	8	0.159702	-0.0813009	475	0
3	30	9	0.572494	-0.0323316	500	0
3	30	10	-0.685869	0.131871	470	0
3	31	1	-0.307432	0.160902	485	0
3	31	2	-0.178639	-0.0309117	440	0
3	31	3	-0.0917049	-0.146002	495	0
3	31	4	-0.254347	0.0237444	525	0
3	31	5	0.320685	0.0195512	515	0
3	31	6	-0.0266241	0.0473644	580	0
3	31	7	0.216402	0.0675791	490	0
3	31	8	-0.0818908	-0.145857	495	0
3	31	9	-0.0282846	-0.0773337	565	0
3	31	10	0.364289	0.270688	590	0
3	32	1	0.415953	1.51842	830	0
3	32	2	-0.167081	0.289483	540	0
3	32	3	0.429257	0.209543	530	0
3	32	4	-0.367982	-0.159186	555	0
3	32	5	0.297774	0.218146	625	0
3	32	6	-0.0761937	-0.0441664	560	0
3	32	7	0.194571	-0.314006	565	0
3	32	8	-0.981911	-0.472769	550	0
3	32	9	-0.0939715	-0.210295	575	0
3	32	10	0.0321658	-0.411751	550	0
3	33	1	0.302976	-0.0788447	525	0
3	33	2	0.200631	-0.0914734	515	0
3	33	3	0.0178146	0.0817961	560	0
3	33	4	-0.779234	0.0938379	520	0
3	33	5	-0.322698	0.112685	535	0
3	33	6	-0.147488	0.0199929	525	0
3	33	7	0.402747	0.0274593	610	0
3	33	8	0.191235	-0.0605254	580	0
3	33	9	-0.172107	-0.00961775	565	0
3	33	10	0.183676	0.0219634	640	0
4	34	1	-0.101357	0.0088702	565	0
4	34	2	0.306024	-0.0372943	510	0
4	34	3	0.453917	-0.116151	530	0
4	34	4	-0.247453	0.129255	555	0
4	34	5	0.205644	0.164886	575	0
4	34	6	-0.393044	-0.0331735	555	0
4	34	7	0.765321	-0.00669325	500	0
4	34	8	-0.684725	0.021734	540	0
4	34	9	-0.599542	-0.20495	560	0
4	34	10	0.432079	0.0389621	475	0
4	35	1	-0.173035	-0.0689624	575	0
4	35	2	-0.34061	-0.211124	580	0
4	35	3	-0.224406	-0.0583844	570	0
4	35	4	-0.485977	-0.115445	620	0
4	35	5	0.388671	-0.00944699	565	0
4	35	6	-0.291946	-0.166813	540	0
4	35	7	-0.1733	0.248816	645	0
4	35	8	-0.0396844	0.023354	580	0
4	35	9	0.676045	0.322652	775	0
4	35	10	0.392555	0.214885	615	0
4	36	1	0.479812	-0.0837461	425	0
4	36	2	0.346444	-0.0661084	430	0
4	36	3	0.450833	0.276958	485	0
4	36	4	0.19093	0.253947	475	0
4	36	5	-0.553632	0.0655434	450	0
4	36	6	-0.0274401	-0.142564	480	0
4	36	7	0.460841	0.202631	415	0
4	36	8	-1.3105	-0.378199	415	0
4	36	9	-0.595104	-0.102344	475	0
4	36	10	0.514305	-0.0439233	460	0
4	37	1	-0.398653	0.136865	525	0
4	37	2	0.168019	-0.134791	540	0
4	37	3	0.343555	0.134926	565	0
4	37	4	0.461977	-0.0497345	610	0
4	37	5	-0.0813174	0.187863	515	0
4	37	6	-0.026624	0.0490297	510	0
4	37	7	0.0383257	-0.0645081	630	0
4	37	8	-0.0386479	-0.000944022	520	0
4	37	9	-0.103853	-0.0121719	535	0
4	37	10	-0.437854	-0.27527	545	0
4	38	1	-0.455581	0.0338567	465	0
4	38	2	-0.350983	-0.231552	475	0
4	38	3	-0.00778339	-0.234462	550	0
4	38	4	0.14935	0.069086	585	0
4	38	5	0.459743	0.511443	480	0
4	38	6	0.0622832	0.0424039	515	0
4	38	7	0.606114	-0.0985714	500	0
4	38	8	-0.661204	-0.0988748	575	0
4	38	9	0.504401	-0.000942803	550	0
4	38	10	-0.299749	-0.09653	525	0
4	39	1	0.357452	0.0325905	550	0
4	39	2	-0.782674	-0.178835	460	0
4	39	3	-0.141221	0.250608	600	0
4	39	4	-0.127937	0.188433	665	0
4	39	5	0.497289	-0.104157	525	0
4	39	6	-0.514144	0.039964	535	0
4	39	7	0.776628	0.173938	595	0
4	39	8	-0.970814	-0.57292	525	0
4	39	9	0.172727	-0.19582	1045	0
4	39	10	1.24321	0.345757	615	0
4	40	1	0.710165	0.486386	540	0
4	40	2	0.0795705	0.0537769	555	0
4	40	3	-0.00813707	-0.0404897	575	0
4	40	4	-0.204126	-0.111571	585	0
4	40	5	-0.337907	-0.216813	555	0
4	40	6	0.172757	0.197015	735	0
4	40	7	-0.238162	-0.18957	585	0
4	40	8	0.00822021	0.00080266	525	0
4	40	9	-0.141568	-0.113949	535	0
4	40	10	-0.0710424	-0.0777385	540	0
4	41	1	-0.533734	-0.065719	545	0
4	41	2	-0.306925	-0.0483334	575	0
4	41	3	-0.0452938	-0.239838	535	0
4	41	4	0.466949	0.0680042	595	0
4	41	5	0.433544	0.0587247	510	0
4	41	6	-0.0595834	-0.0499512	590	0
4	41	7	-0.192674	0.0361733	545	0
4	41	8	-0.354852	0.100292	505	0
4	41	9	-0.173815	-0.123575	475	0
4	41	10	0.720822	0.204021	555	0
4	42	1	0.0368664	-0.0543686	470	0
4	42	2	-0.264214	-0.0832426	475	0
4	42	3	0.256038	-0.138291	480	0
4	42	4	-0.0382748	0.00737043	475	0
4	42	5	0.231551	0.179974	580	0
4	42	6	-0.259338	-0.314283	605	0
4	42	7	0.499222	0.192724	575	0
4	42	8	0.0534693	0.0587952	510	0
4	42	9	-0.390209	-0.0528587	560	0
4	42	10	-0.136936	0.0862161	525	0
5	43	1	0.542108	0.139833	530	0
5	43	2	-0.0263445	-0.24922	525	0
5	43	3	0.00156166	0.0786981	505	0
5	43	4	0.221652	0.126549	500	0
5	43	5	-0.262453	-0.0929738	545	0
5	43	6	-0.0236762	0.0566686	430	0
5	43	7	-0.35438	0.0414178	540	0
5	43	8	-0.212517	0.0670871	565	0
5	43	9	-0.0880015	-0.100456	570	0
5	43	10	0.300201	-0.145982	565	0
5	44	1	0.661995	0.0477134	535	0
5	44	2	-0.0649567	0.214296	510	0
5	44	3	0.144672	0.0546894	410	0
5	44	4	0.650903	0.173233	495	0
5	44	5	-0.219608	-0.103653	510	0
5	44	6	-0.213272	0.0107648	500	0
5	44	7	0.372598	-0.0474586	485	0
5	44	8	-0.262014	-0.141678	520	0
5	44	9	-0.774078	-0.237963	515	0
5	44	10	-0.212327	-0.0107392	525	0
5	45	1	-0.0863758	-0.0120195	535	0
5	45	2	0.404356	0.115074	545	0
5	45	3	-0.135708	0.118054	540	0
5	45	4	0.928033	0.00324338	550	0
5	45	5	-0.0208557	0.301699	610	0
5	45	6	-0.318665	-0.497706	490	0
5	45	7	0.0201993	-0.137736	715	0
5	45	8	0.0542255	0.267628	660	0
5	45	9	-0.431956	-0.293115	555	0
5	45	10	-0.212303	0.0824331	530	0
5	46	1	-0.39978	-0.144165	640	0
5	46	2	1.03035	0.244808	600	0
5	46	3	-0.0892646	0.0915726	570	0
5	46	4	-0.119706	-0.159814	515	0
5	46	5	0.213852	0.197536	585	0
5	46	6	-0.121227	-0.165174	500	0
5	46	7	-0.0256922	0.139248	510	0
5	46	8	0.135431	-0.0413837	465	0
5	46	9	-0.0603858	-0.0357991	500	0
5	46	10	-0.619016	-0.104717	550	0
5	47	1	-0.587982	-0.293135	565	0
5	47	2	0.589612	0.0465772	525	0
5	47	3	1.06891	0.275749	480	0
5	47	4	0.119524	-0.0730303	625	0
5	47	5	-0.254885	0.0273764	575	0
5	47	6	-0.510534	-0.0946339	625	0
5	47	7	0.564316	0.312404	640	0
5	47	8	-0.377513	-0.208515	645	0
5	47	9	0.236093	0.238082	570	0
5	47	10	-0.574545	-0.391209	605	0
5	48	1	-0.191072	-0.248413	470	0
5	48	2	-0.236991	-0.141887	515	0
5	48	3	0.0551644	0.141162	525	0
5	48	4	0.177025	0.295825	470	0
5	48	5	-0.33422	-0.312903	555	0
5	48	6	0.112727	0.0817892	485	0
5	48	7	0.315594	0.167461	480	0
5	48	8	0.0503301	0.166132	495	0
5	48	9	-0.0443747	-0.14506	545	0
5	48	10	0.155746	-0.132103	525	0
5	49	1	0.96828	0.174767	500	0
5	49	2	-0.676833	-0.373018	505	0
5	49	3	-0.0596927	-0.104694	590	0
5	49	4	0.509262	0.173931	485	0
5	49	5	-0.534035	-0.212229	505	0
5	49	6	-0.266265	0.0405774	510	0
5	49	7	0.250622	0.182826	575	0
5	49	8	0.199816	0.272906	540	0
5	49	9	-0.113468	-0.19234	500	0
5	49	10	-0.297059	-0.0279491	495	0
5	50	1	0.115333	0.162055	635	0
5	50	2	0.327445	-0.0767802	750	0
5	50	3	-0.470157	-0.265215	620	0
5	50	4	-0.0791707	-0.0888182	570	0
5	50	5	-0.0411814	0.0496141	630	0
5	50	6	0.172569	0.118007	550	0
5	50	7	0.0015116	-0.18033	550	0
5	50	8	0.117413	0.0379045	550	0
5	50	9	-0.260215	-0.00609249	750	0
5	50	10	0.121213	0.274318	630	0
6	51	1	-0.426097	-0.0206244	600	0
6	51	2	-0.158055	0.175464	810	0
6	51	3	0.301506	0.381244	930	0
6	51	4	0.116242	-0.00590108	660	0
6	51	5	0.227033	-0.0890018	705	0
6	51	6	0.0267589	0.0461214	660	0
6	51	7	-0.0676241	-0.0912753	665	0
6	51	8	-0.0754923	-0.256849	645	0
6	51	9	0.138389	0.0360403	650	0
6	51	10	-0.315956	-0.0732097	620	0
6	52	1	-0.0549879	0.0503535	520	0
6	52	2	-0.148828	-0.0216136	535	0
6	52	3	-0.402798	-0.0466182	545	0
6	52	4	-0.0385683	0.0516949	595	0
6	52	5	-0.0314749	-0.12217	555	0
6	52	6	0.262843	0.0267805	545	0
6	52	7	0.0792422	0.249543	530	0
6	52	8	-0.0605676	-0.0185394	595	0
6	52	9	-0.0357892	-0.0215143	650	0
6	52	10	0.415367	-0.0109825	605	0
6	53	1	-0.431757	-0.112878	575	0
6	53	2	0.179085	0.428356	615	0
6	53	3	0.389353	0.311944	660	0
6	53	4	0.441464	0.037846	555	0
6	53	5	-0.823702	-0.335812	605	0
6	53	6	0.0772951	-0.10838	610	0
6	53	7	0.230524	0.0162626	510	0
6	53	8	-0.0795063	0.00908044	595	0
6	53	9	0.0968633	0.0948456	690	0
6	53	10	-0.105039	-0.143724	520	0
6	54	1	0.860338	0.946846	690	0
6	54	2	0.316492	0.185428	735	0
6	54	3	-0.0794006	0.463781	595	0
6	54	4	-0.305605	-0.323957	570	0
6	54	5	-0.184119	0.111686	530	0
6	54	6	0.0155185	-0.117298	615	0
6	54	7	-0.126841	-0.197835	560	0
6	54	8	0.173589	-0.217696	555	0
6	54	9	0.0200163	-0.324921	645	0
6	54	10	-0.918537	-0.249869	550	0
6	55	1	0.454156	0.119411	585	0
6	55	2	-0.192112	-0.0714777	625	0
6	55	3	-0.207381	0.162866	630	0
6	55	4	-0.0575508	0.0123385	630	0
6	55	5	0.453737	0.19296	595	0
6	55	6	-0.56677	-0.261908	595	0
6	55	7	0.566047	0.11911	625	0
6	55	8	0.0345351	-0.0690954	495	0
6	55	9	-0.404114	-0.00413622	565	0
6	55	10	-0.0794519	-0.111869	620	0
6	56	1	0.0102993	0.109484	430	0
6	56	2	-0.309449	-0.133434	465	0
6	56	3	-0.271213	-0.00637114	475	0
6	56	4	0.211904	0.00509078	495	0
6	56	5	-0.0230796	-0.0620098	475	0
6	56	6	0.213433	0.0573814	535	0
6	56	7	0.0189876	-0.016275	480	0
6	56	8	0.21911	0.00809321	505	0
6	56	9	-0.269309	0.0861442	480	0
6	56	10	0.217601	-0.0175268	475	0
6	57	1	0.280006	0.052528	420	0
6	57	2	-0.676657	-0.428665	490	0
6	57	3	0.158659	0.0477512	480	0
6	57	4	0.0148608	0.179742	515	0
6	57	5	0.71452	0.301614	605	0
6	57	6	0.48167	0.163441	425	0
6	57	7	-0.191124	-0.046208	480	0
6	57	8	-0.202366	0.0323488	525	0
6	57	9	-0.515237	-0.156866	510	0
6	57	10	-0.102168	-0.0302013	515	0
6	58	1	0.270444	0.203436	655	0
6	58	2	0.387711	0.296264	675	0
6	58	3	-0.636867	-0.281324	665	0
6	58	4	0.290793	0.0331883	740	0
6	58	5	-0.0477457	-0.0800036	600	0
6	58	6	0.297097	-0.117195	530	0
6	58	7	-0.217845	0.0127607	520	0
6	58	8	-0.319754	0.0203924	525	0
6	58	9	0.326591	0.0543604	605	0
6	58	10	-0.528015	0.00807684	535	0
6	59	1	-0.0513033	-0.0556139	535	0
6	59	2	-0.295204	0.0220239	545	0
6	59	3	-0.587741	-0.228542	590	0
6	59	4	-0.357077	0.0578511	485	0
6	59	5	0.0391549	0.106891	625	0
6	59	6	-0.0794684	-0.0501361	640	0
6	59	7	0.433713	-0.0647139	565	0
6	59	8	0.431096	0.0486028	550	0
6	59	9	0.828155	0.220973	525	0
6	59	10	-0.309237	-0.0409915	580	0
6	60	1	-0.47896	-0.221313	540	0
6	60	2	0.099118	0.0854762	610	0
6	60	3	-0.00545738	-0.0266918	655	0
6	60	4	0.0812546	0.165598	580	0
6	60	5	-0.175995	-0.416573	810	0
6	60	6	-0.871154	-0.385864	595	0
6	60	7	0.149545	0.243112	655	0
6	60	8	-0.0544373	0.0828995	570	0
6	60	9	0.825575	0.279567	565	0
6	60	10	0.477892	0.245234	610	0
6	61	1	-0.0910382	-0.194294	690	0
6	61	2	-0.11887	-0.0683913	780	0
6	61	3	0.107872	-0.0688334	550	0
6	61	4	-0.186712	-0.0683577	530	0
6	61	5	0.203375	0.3449	600	0
6	61	6	0.257752	0.05876	710	0
6	61	7	-0.63808	0.0633207	625	0
6	61	8	0.0668222	0.0904198	675	0
6	61	9	0.224778	-0.0189812	655	0
6	61	10	0.181053	0.0127296	620	0
6	62	1	0.0544707	0.305431	565	0
6	62	2	-0.0390068	0.0962479	535	0
6	62	3	1.26022	0.467366	585	0
6	62	4	-0.175709	0.108768	550	0
6	62	5	-1.42516	-1.02331	670	0
6	62	6	-0.12292	-0.0719318	490	0
6	62	7	0.364375	-0.0835723	540	0
6	62	8	-0.191169	0.0400246	580	0
6	62	9	0.176293	-0.0811938	535	0
6	62	10	0.234912	0.0804363	495	0
6	63	1	0.13812	-0.0125711	590	0
6	63	2	-0.295757	-0.0365924	535	0
6	63	3	0.0588792	0.0993955	610	0
6	63	4	-0.455631	-0.0757405	600	0
6	63	5	0.125608	0.057139	545	0
6	63	6	0.336771	0.0366753	520	0
6	63	7	0.224804	-0.0198013	490	0
6	63	8	-0.311196	-0.233238	605	0
6	63	9	0.00743252	0.176321	525	0
6	63	10	0.223006	0.211652	640	0
6	64	1	0.461328	0.220614	590	0
6	64	2	-0.127577	-0.0154366	595	0
6	64	3	-0.343128	-0.0264978	540	0
6	64	4	0.0490091	-0.108765	515	0
6	64	5	0.0278409	0.159086	520	0
6	64	6	0.470157	0.0736499	710	0
6	64	7	0.345607	0.0926686	700	0
6	64	8	-0.219205	-0.039901	595	0
6	64	9	0.215482	0.112342	625	0
6	64	10	-1.02471	-0.340974	630	0
6	65	1	0.642681	0.282637	450	0
6	65	2	-0.388227	-0.533484	495	0
6	65	3	-0.407321	-0.0818642	505	0
6	65	4	-0.0056219	0.0292585	515	0
6	65	5	-0.206774	-0.131757	520	0
6	65	6	-0.167812	0.114154	505	0
6	65	7	0.0505743	-0.116576	535	0
6	65	8	0.256838	0.340571	495	0
6	65	9	0.0471217	0.0557521	510	0
6	65	10	0.226598	0.0788479	545	0
6	66	1	-0.252484	0.0485146	620	0
6	66	2	0.12918	0.0988532	490	0
6	66	3	-0.164584	-0.0748042	505	0
6	66	4	0.0926348	-0.0999636	490	0
6	66	5	-0.356151	-0.182621	515	0
6	66	6	0.726958	0.0811189	615	0
6	66	7	0.158345	0.148778	495	0
6	66	8	-0.583883	-0.0689518	625	0
6	66	9	0.135971	0.0311592	520	0
6	66	10	0.164817	0.0570353	490	0
6	67	1	-0.0563891	0.259775	560	0
6	67	2	0.155108	0.244028	475	0
6	67	3	-0.128546	-0.0185593	540	0
6	67	4	-0.128424	-0.161053	575	0
6	67	5	0.210581	0.0497742	595	0
6	67	6	0.656699	0.0581192	675	0
6	67	7	0.0636702	0.0774514	585	0
6	67	8	-0.547777	-0.384852	620	0
6	67	9	-0.348975	-0.389198	620	0
6	67	10	0.0790572	0.25769	530	0
6	68	1	0.133975	0.206486	620	0
6	68	2	0.660467	-0.0430613	575	0
6	68	3	0.056226	0.11999	535	0
6	68	4	-0.0840686	0.0378261	525	0
6	68	5	-0.247107	-0.0909983	510	0
6	68	6	-0.30112	0.0720222	540	0
6	68	7	-0.151659	-0.138242	535	0
6	68	8	-0.0673501	-0.0311953	650	0
6	68	9	0.110803	0.0228363	495	0
6	68	10	-0.174329	-0.00133101	590	0
6	69	1	0.136564	0.0935517	480	0
6	69	2	0.0758266	0.218078	415	0
6	69	3	0.162283	0.122396	450	0
6	69	4	-0.174106	-0.069199	510	0
6	69	5	-0.0156179	-0.0477344	520	0
6	69	6	-0.0141066	0.00629595	510	0
6	69	7	-0.219791	-0.141981	625	0
6	69	8	-0.0699868	0.037948	590	0
6	69	9	0.261851	-0.079895	520	0
6	69	10	-0.0467644	-0.0473631	490	0
6	70	1	0.101044	0.295496	695	0
6	70	2	-1.04312	-0.508411	695	0
6	70	3	-0.0649444	0.051821	700	0
6	70	4	-0.15262	0.0448491	610	0
6	70	5	0.303244	0.161522	715	0
6	70	6	-0.408236	-0.0669174	500	0
6	70	7	0.489028	0.144696	580	0
6	70	8	0.061628	-0.0632616	705	0
6	70	9	0.389571	0.129478	650	0
6	70	10	0.307025	-0.0612325	630	0
6	71	1	0.346029	-0.0116923	630	0
6	71	2	0.494479	-0.0222365	610	0
6	71	3	0.255597	0.0984483	530	0
6	71	4	0.639593	0.207995	600	0
6	71	5	-0.855294	-0.37159	580	0
6	71	6	-0.532555	-0.116137	565	0
6	71	7	-0.405455	0.0422197	605	0
6	71	8	0.301709	0.201611	620	0
6	71	9	-0.39347	-0.0664405	660	0
6	71	10	0.167911	0.108861	600	0
6	72	1	-0.534917	-0.0826185	560	0
6	72	2	0.468557	0.161109	505	0
6	72	3	-0.245553	-0.241823	555	0
6	72	4	0.419807	0.0483963	495	0
6	72	5	0.296366	0.0318497	535	0
6	72	6	-0.0660913	0.0981931	615	0
6	72	7	-0.0964988	-0.187389	605	0
6	72	8	-0.126514	0.205632	655	0
6	72	9	0.225557	0.0457009	500	0
6	72	10	-0.232469	0.053922	500	0
6	73	1	-0.151238	-0.0953944	560	0
6	73	2	-0.611385	-0.121575	535	0
6	73	3	-0.208089	0.00767332	510	0
6	73	4	-0.269381	0.200309	505	0
6	73	5	0.208667	0.00793108	555	0
6	73	6	0.209897	0.0191066	510	0
6	73	7	0.313085	0.117844	545	0
6	73	8	-0.0860716	-0.148933	520	0
6	73	9	0.263346	0.0280141	550	0
6	73	10	0.307074	0.036953	515	0
7	74	1	0.700779	0.376339	690	0
7	74	2	-0.0675669	-0.0271176	650	0
7	74	3	-0.0240483	-0.136553	665	0
7	74	4	-0.136253	-0.0510293	645	0
7	74	5	-0.308301	-0.0720891	645	0
7	74	6	-0.387078	-0.0451341	660	0
7	74	7	-0.0479043	-0.0595351	575	0
7	74	8	0.267966	0.046315	510	0
7	74	9	0.254462	0.168323	565	0
7	74	10	-0.139306	-0.0810051	625	0
7	75	1	0.309405	0.2182	550	0
7	75	2	-0.27583	-0.153297	560	0
7	75	3	0.315223	-0.0826363	610	0
7	75	4	0.214755	0.0688806	525	0
7	75	5	-0.331053	0.00333384	540	0
7	75	6	-0.391997	-0.131629	555	0
7	75	7	0.121627	0.255415	560	0
7	75	8	0.00730497	0.012516	575	0
7	75	9	0.0595412	0.00960579	575	0
7	75	10	-0.0570834	-0.181771	570	0
7	76	1	0.529159	0.256331	570	0
7	76	2	0.0646959	0.114824	615	0
7	76	3	-0.241742	0.0792511	585	0
7	76	4	-0.1849	-0.0357346	540	0
7	76	5	0.0386264	0.0671745	540	0
7	76	6	0.22212	0.132837	670	0
7	76	7	-0.417281	-0.154222	530	0
7	76	8	0.225562	-0.0742749	520	0
7	76	9	0.0253333	-0.264217	485	0
7	76	10	-0.257585	0.0952796	510	0
7	77	1	-0.200551	-0.252477	475	0
7	77	2	-0.131465	-0.0998558	520	0
7	77	3	-0.247371	0.552132	675	0
7	77	4	-0.358787	-0.261566	575	0
7	77	5	0.483981	0.843043	800	0
7	77	6	-0.404228	-0.244986	645	0
7	77	7	-0.0648377	0.00601433	525	0
7	77	8	0.615789	0.0849622	605	0
7	77	9	-0.244234	-0.195698	575	0
7	77	10	0.240179	0.0241121	630	0
7	78	1	0.574548	0.229312	615	0
7	78	2	0.299307	0.199049	515	0
7	78	3	-0.29159	-0.302563	655	0
7	78	4	-0.013328	0.246584	735	0
7	78	5	0.498618	0.00104997	675	0
7	78	6	-0.654759	0.0380058	610	0
7	78	7	-0.336874	-0.16419	625	0
7	78	8	0.241631	0.166282	655	0
7	78	9	-0.574503	-0.251241	630	0
7	78	10	0.292488	-0.0408237	550	0
7	79	1	-0.238982	-0.0582162	560	0
7	79	2	-0.0981282	0.00706459	505	0
7	79	3	-0.182889	-0.0663144	540	0
7	79	4	0.241107	0.0493039	645	0
7	79	5	0.20318	0.0352497	590	0
7	79	6	0.0470246	-0.0733606	550	0
7	79	7	0.177698	0.041301	560	0
7	79	8	-0.321364	0.050445	610	0
7	79	9	0.330605	0.0639151	560	0
7	79	10	-0.230438	0.045701	520	0
7	80	1	0.028117	-0.263014	600	0
7	80	2	-0.153859	-0.103654	660	0
7	80	3	0.279425	0.414786	540	0
7	80	4	0.32308	0.0981696	550	0
7	80	5	-0.358682	-0.219299	600	0
7	80	6	0.199221	0.172728	580	0
7	80	7	0.34797	0.0329012	600	0
7	80	8	-0.255985	0.0322625	580	0
7	80	9	-0.537975	-0.240204	625	0
7	80	10	0.204649	0.0235297	580	0
7	81	1	0.349957	0.196505	525	0
7	81	2	-0.242132	0.0732779	480	0
7	81	3	-0.396468	0.0328846	565	0
7	81	4	-0.0592339	0.0378351	475	0
7	81	5	0.268643	0.1192	520	0
7	81	6	-0.800857	-0.312149	465	0
7	81	7	0.671389	0.220691	430	0
7	81	8	-0.114371	-0.15927	515	0
7	81	9	0.527765	0.137121	480	0
7	81	10	-0.210289	-0.261696	445	0
7	82	1	-0.0811969	0.223471	605	0
7	82	2	0.448016	0.0965686	545	0
7	82	3	-0.140371	-0.258638	550	0
7	82	4	-0.361666	-0.184016	595	0
7	82	5	0.179722	-0.0174949	525	0
7	82	6	-0.0451997	0.0850701	540	0
7	82	7	-0.000507858	0.0506095	770	0
7	82	8	0.420972	0.0878564	565	0
7	82	9	-0.395765	-0.0105493	545	0
7	82	10	0.0277391	-0.0582099	600	0
7	83	1	-0.430274	-0.0344031	640	0
7	83	2	0.152056	-0.0923186	630	0
7	83	3	0.217395	0.118918	580	0
7	83	4	0.508504	0.149915	725	0
7	83	5	0.456916	0.076885	685	0
7	83	6	-0.11592	0.0605373	615	0
7	83	7	-0.338312	-0.0805647	570	0
7	83	8	-0.267173	0.00100596	555	0
7	83	9	-0.0535583	-0.053861	585	0
7	83	10	-0.419623	0.0609117	535	0
7	84	1	-0.140627	0.0357819	480	0
7	84	2	-0.452646	-0.250987	450	0
7	84	3	-0.359902	-0.0308887	490	0
7	84	4	0.135607	-0.114832	460	0
7	84	5	0.175598	0.147066	510	0
7	84	6	0.118016	0.206607	495	0
7	84	7	0.229501	0.0199808	470	0
7	84	8	-0.0374875	0.0504895	460	0
7	84	9	-0.374603	-0.207882	460	0
7	84	10	0.659401	0.144505	480	0
7	85	1	-0.748503	-0.0866048	505	0
7	85	2	-0.216715	-0.00416293	530	0
7	85	3	0.0897163	-0.0793506	550	0
7	85	4	-0.0301372	0.0348641	585	0
7	85	5	0.203983	-0.00148119	600	0
7	85	6	0.0692314	0.0906775	545	0
7	85	7	-0.0304066	-0.0770341	635	0
7	85	8	0.10158	-0.00409756	550	0
7	85	9	0.0977185	0.0894574	610	0
7	85	10	0.363525	0.0723344	550	0
7	86	1	0.238791	0.183835	630	0
7	86	2	0.239891	0.245531	550	0
7	86	3	-0.00755824	0.120375	515	0
7	86	4	-0.158444	0.220389	615	0
7	86	5	0.374537	-0.0835734	575	0
7	86	6	0.458841	0.247388	580	0
7	86	7	0.167296	-0.105515	625	0
7	86	8	-0.59947	-0.276112	675	0
7	86	9	-0.534606	-0.255684	470	0
7	86	10	-0.0641593	-0.176827	535	0
7	87	1	0.0951223	-0.217277	505	0
7	87	2	-0.625394	-0.0500244	545	0
7	87	3	-0.147566	-0.0427234	540	0
7	87	4	-0.224677	-0.0845632	545	0
7	87	5	0.0256062	-0.173021	560	0
7	87	6	0.609987	0.190861	595	0
7	87	7	-0.10663	0.187764	560	0
7	87	8	0.202138	-0.0436174	465	0
7	87	9	0.204667	0.135697	625	0
7	87	10	-0.112327	0.144029	565	0
7	88	1	-0.261509	0.0447354	490	0
7	88	2	-0.150091	-0.160683	440	0
7	88	3	0.182404	-0.0391384	420	0
7	88	4	-0.319762	-0.100078	440	0
7	88	5	0.316687	0.0908559	520	0
7	88	6	0.104925	-0.0133381	480	0
7	88	7	0.221947	0.150833	615	0
7	88	8	0.0278501	0.101543	485	0
7	88	9	0.0226108	-0.000694879	575	0
7	88	10	-0.22627	0.0707916	505	0
7	89	1	0.162056	0.233353	545	0
7	89	2	0.42609	0.030901	560	0
7	89	3	0.172275	-0.00746387	630	0
7	89	4	-0.195861	-0.0611349	650	0
7	89	5	-0.167355	-0.0636847	635	0
7	89	6	0.400209	-0.0223802	685	0
7	89	7	-0.489468	-0.131854	555	0
7	89	8	-0.210128	-0.107091	675	0
7	89	9	0.18078	0.30555	695	0
7	89	10	-0.22945	-0.170191	720	0
7	90	1	-0.0506816	-0.016411	525	0
7	90	2	0.423853	0.0769412	430	0
7	90	3	0.181629	0.13806	455	0
7	90	4	-0.499816	0.0739837	485	0
7	90	5	0.303634	0.222155	600	0
7	90	6	-0.38717	-0.0979253	500	0
7	90	7	0.555209	0.0179011	545	0
7	90	8	0.710414	-0.0282172	520	0
7	90	9	-0.82776	-0.0853388	495	0
7	90	10	-0.473953	-0.20432	535	0
7	91	1	-0.329972	-0.275561	750	0
7	91	2	0.464243	0.112972	595	0
7	91	3	0.0576756	-0.0575263	765	0
7	91	4	0.0933171	-0.0281555	555	0
7	91	5	0.0809864	0.0611645	560	0
7	91	6	-0.354949	0.133434	550	0
7	91	7	0.0178536	-0.12171	615	0
7	91	8	0.12722	0.235186	565	0
7	91	9	-0.163224	0.0393965	590	0
7	91	10	0.0664866	-0.0491408	680	0
7	92	1	0.320881	0.0632053	685	0
7	92	2	-0.969802	0.169586	695	0
7	92	3	0.277807	0.345072	650	0
7	92	4	0.0810911	0.0373464	545	0
7	92	5	0.348094	-0.0192346	525	0
7	92	6	0.18614	-0.282843	600	0
7	92	7	0.485075	0.379845	655	0
7	92	8	-0.193962	-0.476671	595	0
7	92	9	0.00674225	0.0586913	545	0
7	92	10	-0.363246	-0.0439463	500	0
7	93	1	0.0345391	-0.0148987	500	0
7	93	2	-0.335089	-0.020977	480	0
7	93	3	-0.0880393	0.128456	475	0
7	93	4	-0.157021	0.167809	500	0
7	93	5	-0.18674	-0.0298378	485	0
7	93	6	-0.130084	-0.0521017	505	0
7	93	7	0.442528	-0.0386381	535	0
7	93	8	-0.00325242	-0.116712	495	0
7	93	9	0.0105209	-0.00645591	470	0
7	93	10	0.322697	0.0250882	580	0
8	94	1	0.0341329	0.0677208	NaN	0
8	94	2	0.070633	-0.129881	NaN	0
8	94	3	0.0753556	0.11781	NaN	0
8	94	4	-0.000835298	-0.0455638	NaN	0
8	94	5	-0.217847	-0.0617185	NaN	0
8	95	1	-0.0300364	0.0409136	NaN	0
8	95	2	0.0337834	-0.0477398	NaN	0
8	95	3	-0.0299925	0.0721937	NaN	0
8	95	4	0.0961215	-0.133322	NaN	0
8	95	5	-0.0783161	0.0513559	NaN	0
8	96	1	0.030658	0.0896324	NaN	0
8	96	2	0.0808996	-0.0264705	NaN	0
8	96	3	0.0730069	0.183162	NaN	0
8	96	4	-0.0275681	-0.0276064	NaN	0
8	96	5	-0.164345	-0.272763	NaN	0
8	97	1	-0.0292461	0.134257	NaN	0
8	97	2	0.252911	0.0902697	NaN	0
8	97	3	0.192759	0.163226	NaN	0
8	97	4	0.0885152	-0.0917786	NaN	0
8	97	5	-0.526571	-0.488093	NaN	0
8	98	1	0.0665842	0.153952	NaN	0
8	98	2	0.00332913	-0.0815282	NaN	0
8	98	3	-0.0163446	-0.347823	NaN	0
8	98	4	0.0158927	-0.299158	NaN	0
8	98	5	-0.115637	0.288334	NaN	0
8	99	1	0.0903897	0.102478	NaN	0
8	99	2	0.0661814	-0.16952	NaN	0
8	99	3	-0.0542464	0.0448266	NaN	0
8	99	4	-0.0605346	0.0668467	NaN	0
8	99	5	-0.0704597	-0.115632	NaN	0
8	100	1	-0.000894526	0.0859152	NaN	0
8	100	2	0.0787308	0.0417432	NaN	0
8	100	3	0.161831	0.105501	NaN	0
8	100	4	-0.0914296	-0.139044	NaN	0
8	100	5	-0.117356	-0.245343	NaN	0
8	101	1	0.00590766	-0.125875	NaN	0
8	101	2	-0.047778	-0.517066	NaN	0
8	101	3	0.13735	0.311636	NaN	0
8	101	4	-0.0690309	0.467546	NaN	0
8	101	5	-0.0372416	-0.421342	NaN	0
8	102	1	-0.102224	-0.326888	NaN	0
8	102	2	0.00464298	0.274846	NaN	0
8	102	3	0.0362352	0.00497885	NaN	0
8	102	4	-0.0333973	-0.244789	NaN	0
8	102	5	0.127883	0.0525589	NaN	0
8	103	1	0.234383	-0.0765061	NaN	0
8	103	2	-0.193935	-0.226038	NaN	0
8	103	3	0.000147545	0.0518509	NaN	0
8	103	4	-0.00200106	0.0473943	NaN	0
8	103	5	0.0302756	0.058531	NaN	0
8	104	1	0.03083	-0.043462	NaN	0
8	104	2	0.203308	0.292827	NaN	0
8	104	3	-0.142271	-0.411023	NaN	0
8	104	4	-0.0331978	0.116076	NaN	0
8	104	5	-0.0818112	-0.00975542	NaN	0
9	105	1	0.766056	0.260745	620	0
9	105	2	-0.0109664	0.129921	485	0
9	105	3	0.365307	0.0974728	465	0
9	105	4	0.246145	0.0391946	460	0
9	105	5	-0.30607	-0.235397	475	0
9	105	6	-0.522007	-0.456884	745	0
9	105	7	-0.651457	-0.137464	530	0
9	105	8	-0.0795588	-0.197866	515	0
9	105	9	0.131136	0.05604	490	0
9	105	10	0.134074	0.143031	500	0
9	106	1	0.184319	-0.206211	640	0
9	106	2	0.173139	0.073123	570	0
9	106	3	-0.473717	-0.236849	555	0
9	106	4	0.137027	0.0471152	555	0
9	106	5	-0.0120977	-0.195935	455	0
9	106	6	0.119224	0.289596	520	0
9	106	7	-0.0448606	-0.218911	740	0
9	106	8	-0.146774	0.0142935	605	0
9	106	9	0.343719	0.255114	525	0
9	106	10	-0.164121	-0.0443824	540	0
9	107	1	0.305006	0.104087	510	0
9	107	2	-0.00103047	0.187815	625	0
9	107	3	-0.0950269	-0.0157215	415	0
9	107	4	0.141529	0.0379289	490	0
9	107	5	-0.202615	-0.0702476	445	0
9	107	6	0.132768	-0.00476442	515	0
9	107	7	-0.14637	-0.083524	485	0
9	107	8	-0.123595	-0.106115	510	0
9	107	9	-0.0794088	-0.157025	535	0
9	107	10	0.0850024	0.00662133	500	0
9	108	1	0.00336533	-0.145599	675	0
9	108	2	0.378707	-0.100513	555	0
9	108	3	0.183706	0.0781124	655	0
9	108	4	-0.452787	-0.201165	460	0
9	108	5	-0.041161	-0.0546133	545	0
9	108	6	0.00651495	0.0593961	545	0
9	108	7	0.158051	0.194708	580	0
9	108	8	0.124605	0.138279	485	0
9	108	9	-0.18442	-0.241682	600	0
9	108	10	-0.248852	0.0402273	620	0
9	109	1	-0.0285839	-0.0661917	505	0
9	109	2	-0.0495744	-0.0659527	565	0
9	109	3	-0.26381	-0.0584481	590	0
9	109	4	0.171738	0.142046	540	0
9	109	5	0.0515721	-0.0420049	670	0
9	109	6	0.0323066	-0.0539803	535	0
9	109	7	0.159558	0.0446183	530	0
9	109	8	-0.133845	-0.00560169	570	0
9	109	9	0.0496237	0.046663	490	0
9	109	10	0.0430437	-0.0422274	460	0
9	110	1	0.24817	-0.173967	475	0
9	110	2	-0.0876713	0.0983387	445	0
9	110	3	0.186424	0.0985661	400	0
9	110	4	0.271015	-0.16918	460	0
9	110	5	0.682649	0.0260679	455	0
9	110	6	-0.605797	-0.126187	440	0
9	110	7	-0.00184091	0.189461	445	0
9	110	8	0.00349464	-0.0788213	485	0
9	110	9	0.0548829	0.106187	470	0
9	110	10	-0.690413	-0.131659	490	0
9	111	1	0.318858	0.156455	570	0
9	111	2	0.112398	0.0987814	505	0
9	111	3	-0.203425	-0.0601543	570	0
9	111	4	0.105953	-0.0832023	605	0
9	111	5	0.38069	0.0124742	525	0
9	111	6	-0.298942	-0.161183	490	0
9	111	7	-0.156312	-0.150515	465	0
9	111	8	-0.0142434	-0.0204966	570	0
9	111	9	-0.251493	0.0165977	605	0
9	111	10	-0.0109134	0.111494	565	0
9	112	1	-0.626291	-0.220688	470	0
9	112	2	0.114781	-0.111975	550	0
9	112	3	-0.32752	-0.081349	490	0
9	112	4	0.0480618	0.0466213	575	0
9	112	5	0.469369	0.226831	550	0
9	112	6	0.160455	0.117287	510	0
9	112	7	0.00534026	-0.0412146	530	0
9	112	8	0.027467	-0.00786693	540	0
9	112	9	-0.277609	-0.174906	575	0
9	112	10	0.377371	0.206414	530	0
9	113	1	-0.486344	-0.352185	495	0
9	113	2	-0.218257	-0.231033	605	0
9	113	3	-0.189407	-0.16285	555	0
9	113	4	-0.541994	-0.176857	575	0
9	113	5	0.3198	0.22338	545	0
9	113	6	0.276219	0.060024	580	0
9	113	7	0.280286	0.247572	560	0
9	113	8	0.252531	0.213053	590	0
9	113	9	-0.138339	-0.0927759	585	0
9	113	10	0.410685	0.231283	605	0
9	114	1	0.117247	0.0887692	665	0
9	114	2	0.0561926	-0.173141	820	0
9	114	3	0.266149	0.0829857	655	0
9	114	4	0.435336	0.0373983	450	0
9	114	5	0.168073	0.114768	770	0
9	114	6	0.143593	0.0924865	620	0
9	114	7	-0.374925	-0.294315	685	0
9	114	8	-0.389454	-0.526926	745	0
9	114	9	-0.365439	0.034156	460	0
9	114	10	-0.0749197	-0.0389535	500	0
9	115	1	-0.155661	0.0974822	555	0
9	115	2	-0.175564	-0.278069	600	0
9	115	3	-0.091437	-0.212957	545	0
9	115	4	-0.146003	-0.0817642	635	0
9	115	5	0.0772975	0.217172	545	0
9	115	6	-0.00844551	-0.104191	635	0
9	115	7	0.112747	-0.147437	600	0
9	115	8	0.358475	0.243773	575	0
9	115	9	-0.0719968	0.0772535	600	0
9	115	10	0.11155	0.0891954	570	0
9	116	1	-0.168825	-0.0971274	505	0
9	116	2	0.04107	0.0116036	520	0
9	116	3	-0.05834	-0.0494974	515	0
9	116	4	-0.0635618	0.0150324	510	0
9	116	5	-0.169638	-0.0913025	545	0
9	116	6	0.687603	0.280532	555	0
9	116	7	-0.0756879	-0.0198438	495	0
9	116	8	0.202978	0.144332	515	0
9	116	9	-0.172095	-0.093439	500	0
9	116	10	-0.218079	-0.102828	500	0
9	117	1	-0.624392	-0.27258	595	0
9	117	2	-0.056418	-0.0385693	575	0
9	117	3	-0.0408136	-0.105551	500	0
9	117	4	-0.155695	-0.0896618	460	0
9	117	5	0.180966	0.0528003	740	0
9	117	6	0.00631548	-0.0606796	520	0
9	117	7	0.0464798	0.0324098	525	0
9	117	8	0.302743	0.0489204	590	0
9	117	9	0.0775764	0.0709678	470	0
9	117	10	0.227179	0.0889904	595	0
9	118	1	-0.237378	0.0347989	480	0
9	118	2	-0.0669916	0.183001	410	0
9	118	3	-0.140082	0.0758802	430	0
9	118	4	0.108645	0.080638	515	0
9	118	5	0.407039	-0.0167256	505	0
9	118	6	-0.223758	-0.106101	480	0
9	118	7	-0.105365	-0.0892452	500	0
9	118	8	0.126196	-0.0919523	500	0
9	118	9	-0.0611422	-0.00608675	520	0
9	118	10	0.178098	-0.0895938	510	0
10	119	1	-0.486872	-0.161086	515	0
10	119	2	0.621089	-0.0209948	525	0
10	119	3	-0.171777	0.0383938	500	0
10	119	4	0.83123	-0.0659907	505	0
10	119	5	0.301979	0.0860373	615	0
10	119	6	-0.000502928	-0.0783946	555	0
10	119	7	-0.379627	0.0931208	560	0
10	119	8	0.292464	0.135059	595	0
10	119	9	0.127347	-0.00273555	540	0
10	119	10	0.199184	0.135855	650	0
10	119	11	-0.724459	-0.233731	560	0
10	119	12	-0.496198	-0.208359	655	0
10	119	13	0.120351	0.185519	575	0
10	119	14	0.907279	0.303921	600	0
10	119	15	0.00161191	0.0564059	600	0
10	119	16	-0.371438	-0.135063	590	0
10	119	17	0.0669321	-0.138679	590	0
10	119	18	0.383095	0.0117693	535	0
10	119	19	-0.202581	-0.101318	605	0
10	119	20	0.1059	0.0368883	555	0
10	119	21	0.210334	0.096871	605	0
10	119	22	-0.785426	-0.367992	620	0
10	119	23	0.808632	-0.0195497	545	0
10	119	24	-0.0206434	0.159497	570	0
10	119	25	-0.416774	-0.206961	540	0
10	119	26	0.0540196	0.0986667	520	0
10	119	27	-0.0558252	0.148719	605	0
10	119	28	0.161637	0.0772349	550	0
10	119	29	0.24924	0.0568886	625	0
10	119	30	-0.0321941	-0.0147916	555	0
10	119	31	0.148355	-0.139674	515	0
10	119	32	0.182815	-0.158302	480	0
10	119	33	-0.162879	0.0962807	525	0
10	119	34	-0.102506	-0.00964421	610	0
10	119	35	-0.244379	-0.033771	605	0
10	119	36	-0.420354	0.0973093	560	0
10	120	1	-0.0486994	-0.0985952	655	0
10	120	2	0.463504	0.0797786	570	0
10	120	3	-0.658017	-0.438273	820	0
10	120	4	-0.41851	-0.217624	640	0
10	120	5	0.822349	0.0851486	595	0
10	120	6	0.59839	0.171769	595	0
10	120	7	0.319788	0.0780052	580	0
10	120	8	-0.296917	0.0961196	620	0
10	120	9	0.275181	-0.0118216	485	0
10	120	10	-0.280937	0.093126	660	0
10	120	11	0.54498	-0.0939076	505	0
10	120	12	-0.509774	0.00417802	525	0
10	120	13	-0.441753	-0.13024	820	0
10	120	14	-0.235252	-0.00454341	510	0
10	120	15	0.634368	0.0409933	570	0
10	120	16	-0.298033	-0.101435	525	0
10	120	17	-0.244073	0.244869	715	0
10	120	18	0.44393	0.100633	585	0
10	120	19	0.17491	-0.0848352	510	0
10	120	20	-0.555631	-0.207708	605	0
10	120	21	-0.660085	-0.100347	530	0
10	120	22	1.15698	0.0407808	570	0
10	120	23	1.03658	0.0870744	500	0
10	120	24	1.14629	0.152097	600	0
10	120	25	-1.12462	-0.21601	750	0
10	120	26	-0.373052	-0.128745	615	0
10	120	27	1.04812	-0.0454028	520	0
10	120	28	-0.102692	-0.150701	495	0
10	120	29	-0.741306	0.075152	630	0
10	120	30	-0.421844	-0.131967	730	0
10	120	31	0.520618	-0.192784	635	0
10	120	32	-0.0430693	-0.0309363	615	0
10	120	33	0.0475701	0.0799641	620	0
10	120	34	0.718847	0.103715	725	0
10	120	35	1.28902	0.13296	535	0
10	120	36	-0.535519	-0.114557	610	0
10	121	1	-0.740307	-0.198118	565	0
10	121	2	0.92632	-0.192339	540	0
10	121	3	-0.507725	-0.187357	505	0
10	121	4	0.803388	-0.0169021	545	0
10	121	5	0.303467	0.220394	565	0
10	121	6	0.265571	-0.104294	510	0
10	121	7	-0.221173	0.0399316	695	0
10	121	8	-0.337143	-0.0809786	625	0
10	121	9	0.460152	0.132065	540	0
10	121	10	-0.167353	-0.116676	540	0
10	121	11	0.577575	-0.0840718	455	0
10	121	12	-0.458485	-0.229208	635	0
10	121	13	-0.56659	-0.0119052	560	0
10	121	14	0.29528	-0.114342	600	0
10	121	15	0.9244	-0.0786892	495	0
10	121	16	0.49398	0.0316903	515	0
10	121	17	0.175486	0.123197	695	0
10	121	18	0.0284213	0.192753	655	0
10	121	19	-0.151126	-0.0358236	645	0
10	121	20	-0.437634	0.0985892	595	0
10	121	21	-0.600391	-0.0218046	565	0
10	121	22	0.0413997	0.0249056	555	0
10	121	23	0.0601546	0.163373	570	0
10	121	24	-0.119044	-0.201569	515	0
10	121	25	-0.136062	0.147049	500	0
10	121	26	-0.523926	-0.211408	510	0
10	121	27	0.147803	0.0292372	535	0
10	121	28	0.149147	0.0859833	655	0
10	121	29	0.0993159	0.204009	615	0
10	121	30	-0.357947	0.00107847	630	0
10	121	31	-0.0288096	0.111004	600	0
10	121	32	0.393756	0.124879	605	0
10	121	33	-0.0168998	-0.136214	620	0
10	121	34	-0.0769525	-0.0242296	540	0
10	121	35	-0.435653	-0.0606582	575	0
10	121	36	0.304941	0.252063	575	0
10	122	1	-0.504265	-0.410714	675	0
10	122	2	-0.0715254	-0.261539	615	0
10	122	3	0.219491	0.21223	590	0
10	122	4	0.370889	0.053205	525	0
10	122	5	-0.295501	-0.0267973	620	0
10	122	6	0.0993395	0.135655	550	0
10	122	7	0.225378	0.16747	515	0
10	122	8	0.069548	-0.0120906	595	0
10	122	9	-0.376372	-0.307364	585	0
10	122	10	0.868201	0.0547494	460	0
10	122	11	0.211749	-0.0601983	580	0
10	122	12	-0.0202515	-0.1107	530	0
10	122	13	-0.344744	-0.0863355	595	0
10	122	14	0.183888	0.160197	765	0
10	122	15	0.724643	0.248406	505	0
10	122	16	0.175465	0.0478791	605	0
10	122	17	-0.328781	-0.267079	655	0
10	122	18	0.537375	0.0380229	520	0
10	122	19	0.172175	0.187038	620	0
10	122	20	0.115069	-0.026213	685	0
10	122	21	-0.229686	-0.245717	590	0
10	122	22	-1.05798	-0.470757	630	0
10	122	23	-0.290085	-0.10591	685	0
10	122	24	0.15717	0.173509	625	0
10	122	25	0.176326	0.358819	660	0
10	122	26	0.139038	0.140936	685	0
10	122	27	-0.318236	-0.171223	625	0
10	122	28	-0.23942	-0.190158	665	0
10	122	29	-0.29775	-0.0435568	610	0
10	122	30	-0.371632	-0.0668122	620	0
10	122	31	0.035704	0.216697	670	0
10	122	32	-0.45384	-0.133264	635	0
10	122	33	0.303695	-0.0570016	700	0
10	122	34	0.159833	0.0972099	570	0
10	122	35	0.279107	0.308261	640	0
10	122	36	0.31258	0.0241339	620	0
10	123	1	-0.420929	-0.127615	515	0
10	123	2	0.754127	0.234203	565	0
10	123	3	0.36087	0.0658654	575	0
10	123	4	-0.345861	0.0146029	570	0
10	123	5	-0.440033	-0.0404505	555	0
10	123	6	-0.122168	-0.0822761	560	0
10	123	7	-0.129278	-0.0372949	515	0
10	123	8	0.170053	0.106802	560	0
10	123	9	0.130141	-0.0692224	545	0
10	123	10	-0.262299	-0.0319847	570	0
10	123	11	0.811732	0.0496545	555	0
10	123	12	0.47838	0.0635819	550	0
10	123	13	0.0859529	-0.113245	535	0
10	123	14	0.208736	0.0557608	520	0
10	123	15	0.0595367	-0.0235947	540	0
10	123	16	0.496125	-0.0266575	500	0
10	123	17	-0.337148	-0.0883844	525	0
10	123	18	-0.11041	0.086505	550	0
10	123	19	-0.110245	0.0673896	570	0
10	123	20	-0.315718	-0.0942171	570	0
10	123	21	-0.272567	-0.0201022	545	0
10	123	22	0.354511	-0.00351748	490	0
10	123	23	-0.331031	-0.0803253	500	0
10	123	24	-0.15974	-0.0574691	525	0
10	123	25	-0.0624501	0.0419034	495	0
10	123	26	-0.357959	-0.172467	580	0
10	123	27	-0.0214342	0.00734898	515	0
10	123	28	0.526065	-0.00253899	520	0
10	123	29	-0.46394	-0.137333	550	0
10	123	30	0.345495	0.0366975	525	0
10	123	31	-0.511282	0.0473849	625	0
10	123	32	-0.044655	0.0294737	535	0
10	123	33	-0.051959	0.0541399	580	0
10	123	34	0.112419	0.000118747	525	0
10	123	35	-0.214126	0.141564	565	0
10	123	36	0.397973	-0.00864523	545	0
10	124	1	1.16952	0.245567	485	0
10	124	2	-0.455421	-0.0615709	610	0
10	124	3	NaN	NaN	570	0
10	124	4	NaN	NaN	340	0
10	124	5	-0.444776	-0.178894	505	0
10	124	6	-0.496347	-0.0806702	535	0
10	124	7	-0.290938	0.0144501	505	0
10	124	8	0.517175	0.281554	475	0
10	124	9	0.560237	0.0858096	445	0
10	124	10	0.560428	0.0570512	510	0
10	124	11	-0.282625	-0.135714	575	0
10	124	12	-0.634686	-0.0238609	490	0
10	124	13	-0.416524	-0.0149225	520	0
10	124	14	NaN	NaN	300	0
10	124	15	0.37119	0.183644	515	0
10	124	16	1.16316	-0.0155021	545	0
10	124	17	0.219508	-0.0454672	515	0
10	124	18	0.476584	0.194187	565	0
10	124	19	0.544777	0.0268174	545	0
10	124	20	0.327703	0.0220418	555	0
10	124	21	-0.226089	-0.0197049	555	0
10	124	22	0.193199	-0.0284378	555	0
10	124	23	0.788486	0.105947	535	0
10	124	24	-0.120689	-0.186425	545	0
10	124	25	-0.508269	-0.131874	545	0
10	124	26	0.223292	-0.00988173	495	0
10	124	27	-0.352324	0.0498189	530	0
10	124	28	0.744201	-0.15302	575	0
10	124	29	NaN	NaN	570	0
10	124	30	-0.321115	-0.219098	620	0
10	124	31	0.805883	0.280612	505	0
10	124	32	-0.644561	0.203625	475	0
10	124	33	-0.0581829	0.0171837	525	0
10	124	34	0.0888668	-0.194458	585	0
10	124	35	-0.733829	-0.227557	565	0
10	124	36	-0.93638	-0.145315	600	0
10	125	1	-0.63312	-0.276318	510	0
10	125	2	0.232578	-0.00109369	510	0
10	125	3	0.801623	0.0630546	505	0
10	125	4	-0.711654	-0.144171	545	0
10	125	5	0.255747	0.069623	470	0
10	125	6	-0.682252	0.129509	560	0
10	125	7	-0.376657	0.0518501	520	0
10	125	8	-0.745105	-0.220651	515	0
10	125	9	0.697557	0.0821749	525	0
10	125	10	-0.397088	0.00956122	500	0
10	125	11	0.954691	0.0210207	510	0
10	125	12	0.791815	0.225652	560	0
10	125	13	0.0852634	-0.12669	545	0
10	125	14	0.20866	0.180878	555	0
10	125	15	0.948034	0.313797	510	0
10	125	16	-0.603681	-0.302667	515	0
10	125	17	0.302233	-0.0507269	585	0
10	125	18	0.3436	-0.191197	515	0
10	125	19	-0.593781	0.162778	600	0
10	125	20	-0.667835	0.360677	495	0
10	125	21	1.34456	-0.00584811	490	0
10	125	22	-0.735621	-0.0750951	490	0
10	125	23	-0.194464	0.0796746	525	0
10	125	24	0.845571	0.138015	510	0
10	125	25	-0.843603	-0.366898	585	0
10	125	26	0.0981652	-0.0217604	580	0
10	125	27	0.310406	0.0286875	515	0
10	125	28	0.50907	-0.138034	480	0
10	125	29	0.650801	0.234394	550	0
10	125	30	-1.16863	-0.14851	575	0
10	125	31	-0.206045	-0.114	525	0
10	125	32	-0.344841	-0.212131	495	0
10	125	33	0.242134	0.0109396	540	0
10	125	34	-0.325645	-0.0921909	530	0
10	125	35	-0.44622	0.0298259	645	0
10	125	36	-0.174945	-0.00266487	495	0
10	126	1	1.29198	-0.0372145	505	0
10	126	2	0.471075	0.0691056	520	0
10	126	3	0.707187	0.0662015	520	0
10	126	4	0.0896328	-0.0735278	510	0
10	126	5	0.184738	-0.0463149	535	0
10	126	6	0.0192032	0.242537	565	0
10	126	7	-0.290412	-0.226945	570	0
10	126	8	0.768635	0.236459	545	0
10	126	9	0.49972	0.0359313	530	0
10	126	10	0.249379	-0.0267106	545	0
10	126	11	-0.316168	-0.0089194	615	0
10	126	12	-0.134744	-0.0235156	530	0
10	126	13	0.497791	-0.030602	625	0
10	126	14	0.462437	0.0135983	525	0
10	126	15	0.0397023	0.0146861	560	0
10	126	16	-0.0547235	0.127041	595	0
10	126	17	-0.106874	-0.146146	555	0
10	126	18	-0.453002	0.0225517	590	0
10	126	19	-0.330496	0.143559	520	0
10	126	20	-0.491091	-0.263606	530	0
10	126	21	-0.519686	-0.0318524	590	0
10	126	22	-0.0636868	0.109256	530	0
10	126	23	-0.270723	-0.0531202	600	0
10	126	24	-0.515832	-0.134077	700	0
10	126	25	-0.0818569	-0.181389	605	0
10	126	26	-0.502235	-0.237907	690	0
10	126	27	0.175446	0.0592005	555	0
10	126	28	0.159658	0.0603898	575	0
10	126	29	-0.261851	0.0491082	560	0
10	126	30	0.122162	0.125342	565	0
10	126	31	-0.308367	-0.0740929	600	0
10	126	32	-0.242805	-0.0935147	565	0
10	126	33	0.369716	-0.0171296	520	0
10	126	34	-0.150501	-0.0838554	590	0
10	126	35	-0.113122	0.0764157	555	0
10	126	36	-0.333439	-0.00788979	620	0
10	127	1	0.75281	-0.225242	490	0
10	127	2	0.426471	-0.151464	480	0
10	127	3	0.41939	-0.153723	455	0
10	127	4	0.257884	-0.259864	495	0
10	127	5	0.134063	-0.364358	505	0
10	127	6	1.02517	0.166684	435	0
10	127	7	0.290852	-0.0779434	500	0
10	127	8	-0.36517	-0.0546602	500	0
10	127	9	NaN	NaN	340	0
10	127	10	0.578294	0.170081	475	0
10	127	11	-0.384812	-0.300237	510	0
10	127	12	0.231818	0.0630794	565	0
10	127	13	0.343154	0.221213	465	0
10	127	14	-0.595248	-0.138052	505	0
10	127	15	0.00388419	0.048322	475	0
10	127	16	-0.236611	-0.0714111	475	0
10	127	17	-0.521961	-0.178555	470	0
10	127	18	-0.16264	-0.0122949	500	0
10	127	19	0.327572	0.0463315	465	0
10	127	20	-0.797966	-0.105307	465	0
10	127	21	-0.221645	-0.163879	460	0
10	127	22	0.309843	0.140348	480	0
10	127	23	-0.347876	0.0969493	595	0
10	127	24	0.194367	0.287961	485	0
10	127	25	0.0858642	-0.0925056	585	0
10	127	26	0.58322	0.183996	470	0
10	127	27	-0.482478	-0.0915986	555	0
10	127	28	0.241533	0.188342	500	0
10	127	29	0.35482	0.102986	440	0
10	127	30	-0.315921	0.00382949	480	0
10	127	31	0.447619	0.14659	525	0
10	127	32	0.21256	0.145101	470	0
10	127	33	NaN	NaN	480	0
10	127	34	-0.483549	0.0252453	465	0
10	127	35	-0.328927	-0.116754	460	0
10	127	36	-0.488527	-0.147119	475	0
10	128	1	0.159781	0.116657	570	0
10	128	2	-0.563542	-0.0994037	605	0
10	128	3	-0.333857	-0.133854	545	0
10	128	4	NaN	NaN	610	0
10	128	5	0.161767	-0.0448065	585	0
10	128	6	-0.130851	0.060792	635	0
10	128	7	-0.0981862	-0.0782292	520	0
10	128	8	-0.346138	-0.0893865	595	0
10	128	9	0.134662	0.0399728	550	0
10	128	10	0.120341	-0.160239	525	0
10	128	11	0.018293	0.00580855	625	0
10	128	12	-0.182011	-0.127558	570	0
10	128	13	-0.0269907	0.155324	570	0
10	128	14	0.457522	0.0199061	565	0
10	128	15	1.02005	-0.0422171	580	0
10	128	16	-0.126405	0.0225235	520	0
10	128	17	-0.455552	-0.047875	605	0
10	128	18	0.664726	-0.155519	560	0
10	128	19	0.0863329	0.0332791	515	0
10	128	20	0.115125	-0.21132	515	0
10	128	21	-0.192831	-0.00780516	530	0
10	128	22	-0.423698	-0.0042959	530	0
10	128	23	-0.250169	0.125492	595	0
10	128	24	-0.292309	-0.0481256	615	0
10	128	25	-0.243756	-0.0357832	565	0
10	128	26	0.0486134	0.336911	560	0
10	128	27	-0.274425	0.0491873	535	0
10	128	28	-0.252129	-0.08358	575	0
10	128	29	-0.220923	-0.0431864	530	0
10	128	30	0.595227	-0.0460387	565	0
10	128	31	0.294768	0.37456	550	0
10	128	32	0.1922	0.0992288	530	0
10	128	33	-0.160819	0.0939577	530	0
10	128	34	0.373086	-0.00936931	595	0
10	128	35	0.409159	-0.0325244	560	0
10	128	36	-0.046597	-0.0998567	590	0
10	129	1	-0.649105	-0.0332139	445	0
10	129	2	-0.29128	-0.332091	550	0
10	129	3	1.2443	0.231969	435	0
10	129	4	-0.125336	-0.119078	560	0
10	129	5	0.991343	0.248036	545	0
10	129	6	0.0699059	0.0499382	665	0
10	129	7	-0.365544	-0.153509	510	0
10	129	8	-0.163147	-0.0745721	590	0
10	129	9	-0.029376	0.380466	820	0
10	129	10	0.0919257	-0.0964713	455	0
10	129	11	0.151773	-0.0109257	540	0
10	129	12	-0.2983	-0.295181	555	0
10	129	13	-0.538851	-0.147063	595	0
10	129	14	-0.380899	-0.104977	505	0
10	129	15	-1.0115	-0.298183	565	0
10	129	16	-0.406478	0.20318	550	0
10	129	17	-0.300736	-0.00128892	610	0
10	129	18	-0.41071	0.134542	555	0
10	129	19	-0.565876	-0.0160606	600	0
10	129	20	0.618223	0.121533	500	0
10	129	21	-0.406226	0.072734	805	0
10	129	22	0.686778	0.00535427	545	0
10	129	23	-0.931765	-0.424761	615	0
10	129	24	0.50975	-0.206078	535	0
10	129	25	0.645719	0.0539975	520	0
10	129	26	1.08419	0.195204	525	0
10	129	27	0.784912	0.175208	575	0
10	129	28	-0.398708	-0.217014	575	0
10	129	29	-0.260521	0.011426	510	0
10	129	30	-0.467217	-0.061752	575	0
10	129	31	-0.225648	0.0964463	510	0
10	129	32	1.09842	0.14377	540	0
10	129	33	0.337231	0.189886	720	0
10	129	34	-0.269704	-0.106188	595	0
10	129	35	-0.61532	-0.26325	725	0
10	129	36	1.55696	-0.0758963	525	0
10	130	1	0.564276	0.045842	510	0
10	130	2	-1.04744	0.049015	515	0
10	130	3	0.446011	-0.0692807	540	0
10	130	4	-0.459536	0.193674	590	0
10	130	5	-0.474826	-0.0637318	750	0
10	130	6	-0.245066	0.0279005	535	0
10	130	7	0.226368	0.0130518	570	0
10	130	8	1.20652	0.027586	570	0
10	130	9	0.549305	-0.0270684	605	0
10	130	10	1.05995	-0.327593	470	0
10	130	11	1.09557	-0.0970801	490	0
10	130	12	0.5513	0.0149454	530	0
10	130	13	-0.418369	-0.103631	695	0
10	130	14	-0.802764	-0.207194	530	0
10	130	15	-0.333491	0.0601604	620	0
10	130	16	0.70776	0.144055	550	0
10	130	17	-0.649221	-0.258569	700	0
10	130	18	-0.126486	0.148679	635	0
10	130	19	0.219977	0.0368222	555	0
10	130	20	0.173389	0.0936595	560	0
10	130	21	-0.075575	0.138229	665	0
10	130	22	0.37341	0.242333	580	0
10	130	23	-0.307338	0.0467224	535	0
10	130	24	-0.491113	0.216828	630	0
10	130	25	-0.692994	-0.362441	635	0
10	130	26	0.0209218	-0.0178482	565	0
10	130	27	0.390224	-0.16251	535	0
10	130	28	-0.349281	-0.114739	555	0
10	130	29	-0.619764	-0.146195	555	0
10	130	30	1.34942	0.146272	565	0
10	130	31	-0.590259	-0.179689	650	0
10	130	32	0.228425	0.254634	535	0
10	130	33	-0.292713	0.125209	530	0
10	130	34	-0.14556	-0.119398	645	0
10	130	35	0.072174	0.0868562	545	0
10	130	36	0.444809	-0.212882	525	0
10	131	1	-0.214053	0.11564	620	0
10	131	2	-0.660567	0.0021077	685	0
10	131	3	-0.855827	0.0300654	705	0
10	131	4	0.117599	-0.0752347	545	0
10	131	5	0.311675	-0.0526289	525	0
10	131	6	0.270127	-0.0222605	460	0
10	131	7	-0.914874	-0.342971	615	0
10	131	8	-0.0657536	-0.0708078	660	0
10	131	9	-0.0570483	-0.0543095	615	0
10	131	10	0.105844	-0.0380282	585	0
10	131	11	-0.413266	-0.229541	600	0
10	131	12	-0.82411	-0.191116	720	0
10	131	13	-0.188653	-0.174716	540	0
10	131	14	-0.516685	-0.169273	765	0
10	131	15	0.750281	-0.072559	585	0
10	131	16	-0.0332324	-0.09634	550	0
10	131	17	0.963204	0.263442	510	0
10	131	18	0.467534	-0.0883054	515	0
10	131	19	0.516677	0.0493896	495	0
10	131	20	0.801966	0.134241	615	0
10	131	21	0.365665	0.216187	605	0
10	131	22	0.287845	0.114748	520	0
10	131	23	1.26658	0.344399	550	0
10	131	24	1.2658	-0.0499291	515	0
10	131	25	0.251339	-0.050942	515	0
10	131	26	0.203271	0.12674	535	0
10	131	27	-0.516851	-0.386402	490	0
10	131	28	0.106847	0.190632	605	0
10	131	29	-0.360501	0.065447	515	0
10	131	30	-0.129339	0.09041	555	0
10	131	31	-1.20652	-0.520859	720	0
10	131	32	-0.188226	-0.1003	670	0
10	131	33	-0.0295589	-0.230263	520	0
10	131	34	-0.0887285	0.253903	575	0
10	131	35	0.470514	0.254654	515	0
10	131	36	-0.173427	-0.0221417	510	0
10	132	1	0.14904	0.00742857	415	0
10	132	2	-0.280906	-0.000492213	510	0
10	132	3	0.735383	0.0937637	405	0
10	132	4	-0.180586	-0.199604	510	0
10	132	5	0.116394	0.0236313	440	0
10	132	6	-0.639212	-0.122007	445	0
10	132	7	0.6491	0.150517	390	0
10	132	8	-0.605795	-0.186178	420	0
10	132	9	0.139972	-0.116533	365	0
10	132	10	0.391411	-0.00625282	420	0
10	132	11	1.06645	-0.0233757	395	0
10	132	12	-0.407088	-0.0602622	440	0
10	132	13	-0.180384	-0.0893846	455	0
10	132	14	-0.391734	0.0725012	670	0
10	132	15	-0.527677	-0.113155	550	0
10	132	16	-0.308843	-0.118905	520	0
10	132	17	-0.430033	-0.102578	795	0
10	132	18	0.617365	0.0284203	490	0
10	132	19	0.675966	-0.0326723	480	0
10	132	20	0.0786332	0.045135	480	0
10	132	21	-0.335341	0.105544	500	0
10	132	22	-0.288126	0.0110254	465	0
10	132	23	0.579717	-0.0145061	515	0
10	132	24	-0.47419	-0.0625278	650	0
10	132	25	0.0186745	-0.120139	480	0
10	132	26	0.0514277	0.00324354	515	0
10	132	27	-0.190797	0.0599476	505	0
10	132	28	0.0547611	0.0432639	575	0
10	132	29	-0.623495	0.201084	595	0
10	132	30	0.163406	0.101747	510	0
10	132	31	0.103029	0.0178088	525	0
10	132	32	-0.0466526	-0.03742	525	0
10	132	33	-0.189759	-0.0243065	515	0
10	132	34	-0.366616	-0.105544	695	0
10	132	35	-0.0711726	0.167657	495	0
10	132	36	0.577957	0.0104321	490	0
10	133	1	0.89622	0.0210377	570	0
10	133	2	1.00728	0.11254	515	0
10	133	3	0.860889	0.0567596	445	0
10	133	4	-0.192216	0.0854147	495	0
10	133	5	-0.472253	-0.0825318	580	0
10	133	6	-0.560865	-0.0944169	590	0
10	133	7	-0.360845	-0.064384	495	0
10	133	8	-0.42585	0.00538562	520	0
10	133	9	0.358511	-0.0888977	495	0
10	133	10	0.730362	0.122847	490	0
10	133	11	0.517944	0.0181247	515	0
10	133	12	0.417927	-0.0121302	490	0
10	133	13	0.0916581	0.095581	510	0
10	133	14	-0.180297	-0.0815588	495	0
10	133	15	0.512809	0.211827	510	0
10	133	16	0.109775	-0.122381	450	0
10	133	17	-0.433472	-0.103952	445	0
10	133	18	-0.0644792	0.0875495	470	0
10	133	19	-0.339628	-0.0493509	490	0
10	133	20	0.147235	-0.0890282	530	0
10	133	21	-0.580337	-0.151485	520	0
10	133	22	-0.791803	-0.0876966	460	0
10	133	23	-0.257455	0.145641	475	0
10	133	24	-0.586639	-0.112874	525	0
10	133	25	0.666666	0.102962	465	0
10	133	26	-0.553698	-0.267271	650	0
10	133	27	0.302889	0.148967	465	0
10	133	28	-0.330539	-0.00975056	465	0
10	133	29	-0.827201	-0.153333	655	0
10	133	30	0.674413	0.119002	450	0
10	133	31	0.187212	0.0953896	525	0
10	133	32	0.633184	0.0166109	500	0
10	133	33	-0.117753	-0.0607983	460	0
10	133	34	-0.429857	-0.129455	415	0
10	133	35	0.0763506	-0.0211166	480	0
10	133	36	0.193671	0.00051459	445	0
10	134	1	0.0135973	-0.203965	515	0
10	134	2	0.530947	-0.0627835	520	0
10	134	3	0.367321	0.0240836	500	0
10	134	4	0.701702	0.129492	390	0
10	134	5	0.678946	-0.114515	450	0
10	134	6	-0.0274195	-0.100921	445	0
10	134	7	0.442091	-0.0719442	495	0
10	134	8	0.11657	0.109633	375	0
10	134	9	1.18068	0.127356	425	0
10	134	10	0.0378565	0.0117185	460	0
10	134	11	-0.717282	0.105962	505	0
10	134	12	0.482797	-0.134488	530	0
10	134	13	-0.00812894	-0.0556008	455	0
10	134	14	0.433557	-0.0697571	510	0
10	134	15	-0.642823	0.013716	480	0
10	134	16	1.01966	0.0921639	485	0
10	134	17	-0.942972	-0.00545138	460	0
10	134	18	-0.539852	-0.11887	570	0
10	134	19	0.324077	-0.191077	415	0
10	134	20	0.0423269	0.152407	515	0
10	134	21	0.49076	0.109338	460	0
10	134	22	0.554734	-0.0533418	490	0
10	134	23	0.341221	0.273653	470	0
10	134	24	-0.597009	-0.0608389	465	0
10	134	25	-0.355839	-0.0643899	510	0
10	134	26	0.548111	0.00584005	430	0
10	134	27	-0.13122	-0.199272	490	0
10	134	28	-0.61674	0.024891	450	0
10	134	29	0.294399	-0.207902	470	0
10	134	30	-0.533887	0.174758	435	0
10	134	31	0.334019	0.0046232	375	0
10	134	32	-0.14637	-0.0717162	465	0
10	134	33	-0.423499	-0.0505585	445	0
10	134	34	0.033871	0.034835	425	0
10	134	35	-0.920511	-0.132088	485	0
10	134	36	-0.202571	0.0252824	485	0
10	135	1	-0.454241	-0.245457	665	0
10	135	2	-0.212821	-0.00394054	555	0
10	135	3	-0.162134	-0.275426	535	0
10	135	4	-0.840688	-0.226895	650	0
10	135	5	-0.559552	-0.153639	930	0
10	135	6	0.660742	-0.0982525	485	0
10	135	7	0.54259	0.0616331	540	0
10	135	8	0.613592	0.185396	530	0
10	135	9	-0.0861721	-0.181427	560	0
10	135	10	-0.290967	-0.051475	620	0
10	135	11	0.119351	-0.363861	520	0
10	135	12	-0.40642	-0.22992	615	0
10	135	13	-0.0142769	-0.208145	600	0
10	135	14	-0.571982	-0.3554	570	0
10	135	15	-0.662263	-0.0167844	575	0
10	135	16	-0.374841	0.0288523	610	0
10	135	17	-0.510605	-0.106414	580	0
10	135	18	-0.689195	-0.361932	640	0
10	135	19	0.200347	0.115489	560	0
10	135	20	0.69306	-0.0395488	565	0
10	135	21	0.202728	0.116508	585	0
10	135	22	-0.0682557	0.0387811	585	0
10	135	23	0.105837	0.170505	585	0
10	135	24	0.709181	0.0869876	595	0
10	135	25	0.0185005	-0.100165	555	0
10	135	26	1.09461	0.116513	540	0
10	135	27	0.062254	0.111403	610	0
10	135	28	-0.160026	0.146516	610	0
10	135	29	0.35137	0.264059	650	0
10	135	30	-0.268214	0.248237	640	0
10	135	31	-0.155575	0.0835516	605	0
10	135	32	-0.14821	-0.067204	655	0
10	135	33	0.882244	0.198076	510	0
10	135	34	0.0757527	0.152198	525	0
10	135	35	0.0406116	0.104679	550	0
10	135	36	0.523207	0.22526	540	0
10	136	1	-0.751572	-0.0462513	670	0
10	136	2	0.168828	0.0801147	480	0
10	136	3	0.0628232	0.0715779	505	0
10	136	4	0.246514	0.000277806	455	0
10	136	5	-0.836678	-0.339273	505	0
10	136	6	NaN	NaN	660	0
10	136	7	-0.612976	-0.220901	550	0
10	136	8	-0.923962	-0.460447	700	0
10	136	9	-0.488919	0.144092	605	0
10	136	10	-0.483127	-0.100097	545	0
10	136	11	0.320531	-0.0481007	510	0
10	136	12	-0.153551	0.170692	475	0
10	136	13	-0.560696	0.138287	575	0
10	136	14	0.769241	0.0792042	480	0
10	136	15	0.346974	-0.00200602	455	0
10	136	16	0.242204	-0.153281	500	0
10	136	17	-0.18219	0.0535881	460	0
10	136	18	0.383875	0.00162484	460	0
10	136	19	0.524611	-0.0197209	495	0
10	136	20	-0.662808	-0.0846875	480	0
10	136	21	0.735183	0.0885731	515	0
10	136	22	NaN	NaN	545	0
10	136	23	0.474386	0.00675347	460	0
10	136	24	0.136626	-0.0752489	480	0
10	136	25	0.827706	0.0485251	460	0
10	136	26	-0.578661	0.112743	425	0
10	136	27	-0.400825	-0.111702	445	0
10	136	28	0.319233	0.210515	445	0
10	136	29	0.343225	-0.0194784	440	0
10	136	30	0.403769	-0.0835737	440	0
10	136	31	1.2165	-0.120104	425	0
10	136	32	-0.635035	-0.277349	420	0
10	136	33	0.295448	0.0257217	430	0
10	136	34	1.05293	-0.0403552	420	0
10	136	35	0.32245	-0.0475868	545	0
10	136	36	0.592801	-0.0929333	500	0
10	137	1	0.739159	0.0966359	590	0
10	137	2	0.190218	-0.00917213	660	0
10	137	3	0.0268221	0.00930224	685	0
10	137	4	0.085905	-0.00327119	630	0
10	137	5	0.000949393	0.0826841	630	0
10	137	6	-0.120413	-0.0693994	640	0
10	137	7	0.283188	0.153359	655	0
10	137	8	0.28095	0.159478	575	0
10	137	9	0.549007	0.165379	625	0
10	137	10	-0.0382959	0.0822126	620	0
10	137	11	-0.166829	-0.0765038	600	0
10	137	12	0.278735	-0.190969	570	0
10	137	13	0.273164	-0.00752918	630	0
10	137	14	-0.669054	-0.0141897	635	0
10	137	15	-0.27164	0.047531	595	0
10	137	16	0.023233	0.0755508	645	0
10	137	17	0.166727	-0.0287838	595	0
10	137	18	-0.891279	-0.240251	765	0
10	137	19	0.0990897	0.437085	645	0
10	137	20	-0.597047	-0.144519	595	0
10	137	21	-0.341204	0.0387917	515	0
10	137	22	-0.7921	-0.122579	610	0
10	137	23	0.130407	-0.0315771	555	0
10	137	24	1.27141	0.107755	525	0
10	137	25	0.371956	0.118561	585	0
10	137	26	0.455787	0.129554	605	0
10	137	27	0.36352	-0.0114018	615	0
10	137	28	0.0391535	-0.0323731	600	0
10	137	29	0.617842	-0.0504079	585	0
10	137	30	-0.0337665	0.172298	675	0
10	137	31	-0.338882	-0.19052	635	0
10	137	32	-0.0604375	-0.123695	540	0
10	137	33	-0.0582165	-0.232903	570	0
10	137	34	-0.636635	-0.0720578	520	0
10	137	35	-0.373818	-0.278128	590	0
10	137	36	-0.42758	-0.0648303	615	0
10	138	1	0.787893	0.0736489	455	0
10	138	2	0.118901	0.172756	435	0
10	138	3	0.181405	-0.10989	425	0
10	138	4	-0.976799	-0.0970044	470	0
10	138	5	-0.305523	-0.0976959	515	0
10	138	6	-0.612851	-0.138908	515	0
10	138	7	-0.580845	-0.124917	590	0
10	138	8	-0.594801	-0.113323	455	0
10	138	9	0.507695	0.0215619	480	0
10	138	10	0.587903	0.173145	515	0
10	138	11	-0.265688	0.241696	525	0
10	138	12	-1.11029	-0.285617	535	0
10	138	13	-0.248376	0.052031	510	0
10	138	14	0.739623	0.00334521	490	0
10	138	15	0.549972	0.0937036	485	0
10	138	16	0.354818	-0.0590715	480	0
10	138	17	0.349637	-0.122671	495	0
10	138	18	0.432568	-0.00987592	475	0
10	138	19	1.19438	0.194894	470	0
10	138	20	0.514526	0.132187	500	0
10	138	21	0.132236	-0.0476121	520	0
10	138	22	0.420979	-0.18215	510	0
10	138	23	-0.253493	-0.284114	700	0
10	138	24	-0.528277	-0.226254	650	0
10	138	25	-0.161129	0.00905261	555	0
10	138	26	0.565971	-0.0803321	485	0
10	138	27	-0.569037	-0.0235058	565	0
10	138	28	-0.210681	-0.133807	560	0
10	138	29	-0.228901	-0.015344	545	0
10	138	30	-0.222708	-0.0536697	630	0
10	138	31	0.756293	0.0793435	525	0
10	138	32	-0.506103	-0.045189	560	0
10	138	33	-0.101826	0.0554546	610	0
10	138	34	0.750637	0.116182	530	0
10	138	35	0.0358252	0.204382	500	0
10	138	36	0.13571	0.0358942	605	0
10	139	1	-0.0321714	0.0736351	705	0
10	139	2	0.247564	-0.00740777	560	0
10	139	3	0.0393338	-0.16028	720	0
10	139	4	0.105142	0.108179	515	0
10	139	5	0.452808	-0.0628178	580	0
10	139	6	0.252765	0.173456	555	0
10	139	7	0.234818	0.0964674	700	0
10	139	8	0.107149	-0.0788597	575	0
10	139	9	-0.0948358	-0.154276	630	0
10	139	10	-0.292232	-0.0647555	600	0
10	139	11	0.778852	0.132652	520	0
10	139	12	-0.30069	-0.309791	775	0
10	139	13	-0.241491	-0.065819	665	0
10	139	14	0.107811	-0.0658573	525	0
10	139	15	0.862347	0.0305676	595	0
10	139	16	-0.282157	-0.0414444	665	0
10	139	17	-0.23541	-0.173861	670	0
10	139	18	-0.132867	0.0985313	630	0
10	139	19	-0.336426	-0.136768	580	0
10	139	20	-0.38174	-0.162838	605	0
10	139	21	-0.0699811	-0.109811	665	0
10	139	22	0.544626	0.0171427	825	0
10	139	23	-0.336801	-0.077092	735	0
10	139	24	0.277802	0.177006	560	0
10	139	25	-0.136429	0.0576325	660	0
10	139	26	0.478886	-0.101944	575	0
10	139	27	0.0243905	-0.0298667	515	0
10	139	28	-0.0737363	0.129849	610	0
10	139	29	-0.158903	0.0771107	600	0
10	139	30	-0.272694	0.103509	615	0
10	139	31	-0.0551152	-0.0123387	575	0
10	139	32	-0.213231	-0.208932	555	0
10	139	33	0.737337	0.413919	560	0
10	139	34	-0.148046	-0.128423	620	0
10	139	35	0.03552	0.112264	590	0
10	139	36	-0.501477	-0.124345	530	0
10	140	1	0.867427	-0.0448192	480	0
10	140	2	-0.34805	-0.0583051	590	0
10	140	3	-0.209385	0.0300547	585	0
10	140	4	-0.0817647	-0.126259	505	0
10	140	5	-0.261042	-0.154214	790	0
10	140	6	NaN	NaN	1060	0
10	140	7	-0.384749	-0.0262315	555	0
10	140	8	-0.119657	0.0192106	670	0
10	140	9	-0.16023	-0.128126	575	0
10	140	10	0.213769	0.0461068	535	0
10	140	11	0.0835918	0.0534907	555	0
10	140	12	NaN	NaN	835	0
10	140	13	NaN	NaN	380	0
10	140	14	-0.651025	-0.0882744	420	0
10	140	15	0.837411	0.441206	500	0
10	140	16	-0.0245613	-0.0240829	530	0
10	140	17	-0.229028	0.0131826	500	0
10	140	18	0.5549	0.0248639	545	0
10	140	19	0.0164638	-0.0220963	645	0
10	140	20	0.0112511	0.0567512	545	0
10	140	21	0.0801865	0.0417227	485	0
10	140	22	0.0380704	0.0660895	560	0
10	140	23	0.15248	0.0940738	565	0
10	140	24	-0.281062	0.0244058	810	0
10	140	25	0.0165732	-0.0632655	565	0
10	140	26	0.166226	0.00800892	480	0
10	140	27	-0.215669	-0.109838	645	0
10	140	28	-0.0305523	-0.000396349	530	0
10	140	29	0.00504755	0.095695	600	0
10	140	30	0.0247461	0.0335951	575	0
10	140	31	-0.196684	-0.1603	640	0
10	140	32	0.345923	-0.089986	560	0
10	140	33	0.146273	0.0402033	530	0
10	140	34	NaN	NaN	715	0
10	140	35	0.00515476	-0.138526	610	0
10	140	36	0.0453666	0.0121473	500	0
10	141	1	0.899992	0.0110414	530	0
10	141	2	-1.17887	-0.123626	560	0
10	141	3	0.561627	-0.173715	450	0
10	141	4	0.537304	-0.0775727	525	0
10	141	5	0.240667	-0.0373087	440	0
10	141	6	-0.980309	-0.189295	720	0
10	141	7	0.0871902	-0.126362	470	0
10	141	8	0.151494	-0.0434604	455	0
10	141	9	0.513688	-0.201904	500	0
10	141	10	-0.315127	-0.136334	600	0
10	141	11	-0.282835	-0.09876	550	0
10	141	12	-0.351952	0.018697	725	0
10	141	13	-0.631613	-0.175416	680	0
10	141	14	NaN	NaN	380	0
10	141	15	0.563172	0.130935	635	0
10	141	16	-0.135262	-0.073435	545	0
10	141	17	-0.981075	-0.0759385	595	0
10	141	18	-0.587721	-0.269194	700	0
10	141	19	-0.416657	-0.039109	510	0
10	141	20	-0.0108328	0.0723873	630	0
10	141	21	-0.310687	-0.0328641	530	0
10	141	22	-0.36205	0.180523	600	0
10	141	23	0.131634	0.00305335	575	0
10	141	24	-0.193938	0.0339544	615	0
10	141	25	-0.527978	-0.0115613	615	0
10	141	26	0.488337	-0.0474016	505	0
10	141	27	0.223334	0.0132234	585	0
10	141	28	-0.319712	-0.0670971	565	0
10	141	29	1.21854	0.0767991	470	0
10	141	30	0.709398	-0.00163896	515	0
10	141	31	-0.177813	0.106407	635	0
10	141	32	-0.0420105	0.131328	520	0
10	141	33	0.71237	0.101696	525	0
10	141	34	0.395145	0.150432	525	0
10	141	35	1.20324	0.0769268	520	0
10	141	36	0.0715976	0.108923	555	0
10	142	1	0.702253	0.0534057	485	0
10	142	2	-0.241949	-0.0253601	500	0
10	142	3	-0.233635	-0.0465188	545	0
10	142	4	-0.5248	-0.0404316	555	0
10	142	5	0.609027	-0.0429428	605	0
10	142	6	0.541734	-0.00612949	570	0
10	142	7	0.219329	-0.0515207	540	0
10	142	8	0.487629	0.0308248	585	0
10	142	9	-0.185145	-0.155608	655	0
10	142	10	0.0615181	0.148117	665	0
10	142	11	-0.18905	-0.0768949	590	0
10	142	12	-0.633266	-0.0021233	545	0
10	142	13	-0.231936	0.02678	590	0
10	142	14	-0.104362	0.202832	775	0
10	142	15	0.228518	-0.0132753	560	0
10	142	16	-0.170714	-0.028244	590	0
10	142	17	-0.387598	-0.158306	655	0
10	142	18	0.228436	-0.0328931	545	0
10	142	19	0.138006	-0.0122177	590	0
10	142	20	0.476276	0.193638	545	0
10	142	21	-0.487442	-0.314802	810	0
10	142	22	-0.352847	-0.145893	655	0
10	142	23	0.0955663	0.295929	665	0
10	142	24	0.235241	0.203464	600	0
10	142	25	0.00302404	0.116877	605	0
10	142	26	-0.0472387	0.072155	605	0
10	142	27	-0.0702039	0.178023	605	0
10	142	28	-0.210668	0.0233874	580	0
10	142	29	0.318851	0.0146177	570	0
10	142	30	0.260058	0.0226637	580	0
10	142	31	0.241155	-0.0908753	555	0
10	142	32	-0.160033	-0.169554	715	0
10	142	33	-0.23466	-0.0670186	550	0
10	142	34	-0.639961	-0.417875	865	0
10	142	35	0.203754	-0.192838	735	0
10	142	36	0.416402	0.0735924	640	0
10	143	1	-0.0559264	-0.00255503	625	0
10	143	2	0.510396	0.341457	525	0
10	143	3	-0.748276	-0.23962	500	0
10	143	4	-0.293786	0.0750044	570	0
10	143	5	-0.131161	0.137563	485	0
10	143	6	-0.213578	-0.260556	500	0
10	143	7	-0.188735	-0.0603253	575	0
10	143	8	-0.321263	0.0238152	460	0
10	143	9	-0.211348	-0.0263665	540	0
10	143	10	-0.500488	-0.214348	510	0
[truncated: 778 more rows]

## Sheet: data-panels-E-through-G
Experiment number	Subject ID	Force orientation	Hand position	Period	Trial number	Hold 2 - Hold 1 (force)	Move force integral
2	8	0	0	0	1	0.183989	0.200887
2	8	0	0	0	2	0.844885	0.153912
2	8	0	0	0	3	0.593088	0.00602513
2	8	0	0	0	4	-0.537207	-0.185665
2	8	0	0	0	5	-0.0337825	-0.131178
2	8	0	0	0	6	-0.555983	-0.307974
2	8	0	0	0	7	-0.560178	-0.543748
2	8	0	0	0	8	-0.449863	-0.401909
2	8	0	0	0	9	-0.639292	-0.84382
2	8	0	0	0	10	-0.543811	-0.643407
2	8	0	0	0	11	-1.41483	-0.724925
2	8	0	0	0	12	-0.908444	-0.658813
2	8	0	0	0	13	-1.17827	-1.05251
2	8	0	0	0	14	-0.986648	-1.17505
2	8	0	0	0	15	-1.76787	-1.15062
2	8	0	0	0	16	-1.52172	-1.0532
2	8	0	0	0	17	-1.83411	-1.17863
2	8	0	0	0	18	-1.68954	-1.42595
2	8	0	0	0	19	-2.0864	-0.966788
2	8	0	0	0	20	-2.08503	-1.27111
2	8	0	0	0	21	-2.43575	-1.67225
2	8	0	0	0	22	-2.29819	-1.89603
2	8	0	0	0	23	-2.34829	-1.72901
2	8	0	0	0	24	-2.31074	-1.52533
2	8	0	0	0	25	-1.12069	-1.42289
2	8	0	0	0	26	-1.63387	-1.33168
2	8	0	0	0	27	-1.72174	-1.43341
2	8	0	0	0	28	-1.52632	-1.44492
2	8	0	0	0	29	-2.30705	-1.63349
2	8	0	0	0	30	-2.46164	-1.68923
2	8	0	0	1	31	-1.95548	-1.47464
2	8	0	0	1	32	-2.08065	-1.43612
2	8	0	0	1	33	-0.821603	-0.844445
2	8	0	0	1	34	-1.36604	-1.39657
2	8	0	0	1	35	-1.12396	-0.886089
2	8	0	0	1	36	-1.38071	-0.797761
2	8	0	0	1	37	-0.98288	-0.856801
2	8	0	0	1	38	-1.2033	-1.13503
2	8	0	0	1	39	-1.09982	0.121348
2	8	0	0	1	40	-1.1512	-0.535619
2	8	0	0	1	41	-1.00309	-0.457439
2	8	0	0	1	42	-1.07342	-0.783351
2	8	0	0	1	43	-0.953162	-0.600955
2	8	0	0	1	44	-0.86009	-0.538255
2	8	0	0	1	45	-1.38615	-0.963867
2	8	0	0	1	46	-1.17198	-0.673742
2	8	0	0	1	47	-0.538243	-0.120008
2	8	0	0	1	48	-0.699931	-0.137878
2	8	0	0	1	49	-0.307262	-0.207624
2	8	0	0	1	50	-0.631411	-0.162958
2	8	0	0	1	51	-0.320895	-0.181663
2	8	0	0	1	52	-0.173847	-0.0204078
2	8	0	0	1	53	-0.563204	-0.0495081
2	8	0	0	1	54	-0.0854666	-0.113449
2	8	1	0	0	1	-0.435678	-0.107568
2	8	1	0	0	2	0.116207	0.0745034
2	8	1	0	0	3	0.574031	0.495996
2	8	1	0	0	4	0.110059	0.228168
2	8	1	0	0	5	1.08946	0.46331
2	8	1	0	0	6	0.476523	0.364876
2	8	1	0	0	7	1.339	0.329834
2	8	1	0	0	8	1.37678	0.440899
2	8	1	0	0	9	1.62218	0.533251
2	8	1	0	0	10	1.10971	0.608717
2	8	1	0	0	11	2.08017	1.00368
2	8	1	0	0	12	1.60751	1.00295
2	8	1	0	0	13	1.75766	1.11653
2	8	1	0	0	14	1.58484	1.11445
2	8	1	0	0	15	1.68188	1.05065
2	8	1	0	0	16	1.84476	1.38963
2	8	1	0	0	17	1.41466	1.53984
2	8	1	0	0	18	1.60002	1.57369
2	8	1	0	0	19	1.79147	1.572
2	8	1	0	0	20	2.01226	1.31755
2	8	1	0	0	21	2.60642	1.60798
2	8	1	0	0	22	2.22793	1.75609
2	8	1	0	0	23	2.31939	1.73284
2	8	1	0	0	24	2.07764	1.24369
2	8	1	0	0	25	2.40768	1.66733
2	8	1	0	0	26	1.91729	1.891
2	8	1	0	0	27	2.20188	1.741
2	8	1	0	0	28	2.55982	1.73973
2	8	1	0	0	29	1.86936	1.33115
2	8	1	0	0	30	2.19957	1.75081
2	8	1	0	1	31	2.60843	1.0012
2	8	1	0	1	32	1.89327	1.25751
2	8	1	0	1	33	2.90412	1.40903
2	8	1	0	1	34	1.85494	1.3726
2	8	1	0	1	35	1.39618	1.45794
2	8	1	0	1	36	2.06559	1.34894
2	8	1	0	1	37	2.08615	1.14987
2	8	1	0	1	38	1.56371	1.1264
2	8	1	0	1	39	1.66481	1.05095
2	8	1	0	1	40	1.16015	0.824785
2	8	1	0	1	41	1.76207	0.912134
2	8	1	0	1	42	1.10734	0.872538
2	8	1	0	1	43	1.55537	0.828234
2	8	1	0	1	44	1.23082	0.588492
2	8	1	0	1	45	1.89976	0.599838
2	8	1	0	1	46	1.61043	0.37976
2	8	1	0	1	47	0.809392	0.4293
2	8	1	0	1	48	1.34279	0.186226
2	8	1	0	1	49	0.995168	0.263746
2	8	1	0	1	50	1.58332	0.241402
2	8	1	0	1	51	0.580288	0.0800885
2	8	1	0	1	52	0.199741	0.25474
2	8	1	0	1	53	0.602489	-0.044403
2	8	1	0	1	54	0.650608	0.140425
2	9	0	0	0	1	0.00238976	-0.104252
2	9	0	0	0	2	-0.0037658	-0.162019
2	9	0	0	0	3	0.0139461	-0.18397
2	9	0	0	0	4	-0.0883756	-0.304719
2	9	0	0	0	5	-0.0391615	-0.340181
2	9	0	0	0	6	-0.708221	-0.0870082
2	9	0	0	0	7	0.818221	-0.35675
2	9	0	0	0	8	-0.384408	-0.568826
2	9	0	0	0	9	-0.496962	-0.636304
2	9	0	0	0	10	0.581712	-0.692228
2	9	0	0	0	11	-0.672595	-0.46212
2	9	0	0	0	12	-0.519691	-0.857389
2	9	0	0	0	13	-0.457188	-0.961504
2	9	0	0	0	14	-0.759993	-0.991959
2	9	0	0	0	15	-0.84123	-1.07623
2	9	0	0	0	16	-0.808951	-0.756888
2	9	0	0	0	17	-0.69833	-0.894214
2	9	0	0	0	18	-0.018624	-1.22201
2	9	0	0	0	19	0.632141	-0.979417
2	9	0	0	0	20	-1.55637	-1.3715
2	9	0	0	0	21	-1.24388	-1.92266
2	9	0	0	0	22	-0.904349	-1.55106
2	9	0	0	0	23	-1.16686	-1.35562
2	9	0	0	0	24	-0.784209	-1.2574
2	9	0	0	0	25	-0.478372	-1.57102
2	9	0	0	0	26	-1.10867	-1.81627
2	9	0	0	0	27	-0.91206	-1.30788
2	9	0	0	0	28	-1.42248	-1.88317
2	9	0	0	0	29	-0.319871	-1.45859
2	9	0	0	0	30	-1.04747	-1.70605
2	9	0	0	1	31	-0.601753	-1.45554
2	9	0	0	1	32	-1.43842	-1.26153
2	9	0	0	1	33	-1.46765	-1.46767
2	9	0	0	1	34	-0.388149	-1.42009
2	9	0	0	1	35	-0.763863	-1.43483
2	9	0	0	1	36	-0.74113	-1.36518
2	9	0	0	1	37	-0.893656	-1.14236
2	9	0	0	1	38	1.48038	-0.49826
2	9	0	0	1	39	0.0653821	-0.719433
2	9	0	0	1	40	-0.591716	-0.733774
2	9	0	0	1	41	-0.79683	-0.678939
2	9	0	0	1	42	-0.176727	-0.688715
2	9	0	0	1	43	0.192326	-0.461295
2	9	0	0	1	44	-0.415008	-0.391427
2	9	0	0	1	45	-0.465062	-0.499368
2	9	0	0	1	46	-0.0366083	-0.453703
2	9	0	0	1	47	0.214446	-0.346527
2	9	0	0	1	48	-0.17629	-0.273095
2	9	0	0	1	49	0.466945	-0.1427
2	9	0	0	1	50	0.14378	-0.0491186
2	9	0	0	1	51	1.047	0.205997
2	9	0	0	1	52	0.165945	-0.000862864
2	9	0	0	1	53	0.524806	0.0125499
2	9	0	0	1	54	-0.0125109	-0.239718
2	9	1	0	0	1	-0.636398	-0.160888
2	9	1	0	0	2	-0.121565	-0.0765924
2	9	1	0	0	3	0.456165	0.737876
2	9	1	0	0	4	1.11147	0.449124
2	9	1	0	0	5	0.00707325	0.246939
2	9	1	0	0	6	0.726406	0.664908
2	9	1	0	0	7	0.265977	0.615056
2	9	1	0	0	8	0.88899	0.917925
2	9	1	0	0	9	1.17648	0.779301
2	9	1	0	0	10	0.412567	0.549349
2	9	1	0	0	11	-0.347821	0.048841
2	9	1	0	0	12	0.844602	1.19365
2	9	1	0	0	13	1.21031	0.933492
2	9	1	0	0	14	0.728815	0.94151
2	9	1	0	0	15	0.889416	0.840878
2	9	1	0	0	16	0.403065	1.09633
2	9	1	0	0	17	0.610846	1.80934
2	9	1	0	0	18	0.517685	0.826283
2	9	1	0	0	19	0.60435	2.04961
2	9	1	0	0	20	0.762097	1.27264
2	9	1	0	0	21	0.885621	1.54363
2	9	1	0	0	22	0.613325	1.67596
2	9	1	0	0	23	0.499163	0.905098
2	9	1	0	0	24	0.863619	1.53802
2	9	1	0	0	25	0.480994	1.3557
2	9	1	0	0	26	-0.84399	0.475876
2	9	1	0	0	27	0.125047	1.55959
2	9	1	0	0	28	0.730145	1.30016
2	9	1	0	0	29	0.163062	1.17113
2	9	1	0	0	30	0.7878	1.99729
2	9	1	0	1	31	1.2156	1.80456
2	9	1	0	1	32	0.614983	1.23924
2	9	1	0	1	33	0.735601	1.21552
2	9	1	0	1	34	1.087	1.22585
2	9	1	0	1	35	0.085893	0.950551
2	9	1	0	1	36	1.11106	1.651
2	9	1	0	1	37	1.05676	1.7864
2	9	1	0	1	38	0.0700252	0.890873
2	9	1	0	1	39	1.26634	1.06875
2	9	1	0	1	40	0.0318047	0.564967
2	9	1	0	1	41	0.739387	0.980254
2	9	1	0	1	42	0.537641	0.621656
2	9	1	0	1	43	-0.150696	0.486111
2	9	1	0	1	44	0.263784	0.5126
2	9	1	0	1	45	0.580133	0.248438
2	9	1	0	1	46	0.871077	0.312331
2	9	1	0	1	47	0.070811	0.171687
2	9	1	0	1	48	-0.0693135	0.41045
2	9	1	0	1	49	-0.0135493	0.280843
2	9	1	0	1	50	-0.116489	-0.0825595
2	9	1	0	1	51	0.47741	-0.0909979
2	9	1	0	1	52	-0.715237	-0.514486
2	9	1	0	1	53	-0.728698	-0.407468
2	9	1	0	1	54	-0.582618	-0.307812
2	10	0	0	0	1	0.203535	0.169972
2	10	0	0	0	2	-0.686479	-0.109213
2	10	0	0	0	3	-0.949281	-0.289293
2	10	0	0	0	4	0.0599293	-0.337921
2	10	0	0	0	5	-0.0194005	-0.328743
2	10	0	0	0	6	-0.090794	-0.0451103
2	10	0	0	0	7	-0.469216	-0.535977
2	10	0	0	0	8	0.179231	-0.402486
2	10	0	0	0	9	-1.3103	-0.884382
2	10	0	0	0	10	-0.731469	-0.589842
2	10	0	0	0	11	-0.799444	-1.17851
2	10	0	0	0	12	-0.773193	-0.551946
2	10	0	0	0	13	0.272794	-0.335188
2	10	0	0	0	14	-0.166138	-0.817265
2	10	0	0	0	15	-0.374811	-0.797514
2	10	0	0	0	16	-1.12662	-1.23957
2	10	0	0	0	17	-0.373613	-0.82442
2	10	0	0	0	18	-0.694142	-1.14697
2	10	0	0	0	19	-1.03521	-1.02816
2	10	0	0	0	20	-0.365575	-0.995023
2	10	0	0	0	21	-1.34013	-1.52458
2	10	0	0	0	22	-0.675656	-1.51115
2	10	0	0	0	23	-0.710052	-1.42423
2	10	0	0	0	24	-0.871599	-1.43376
2	10	0	0	0	25	-1.33884	-1.60254
2	10	0	0	0	26	-1.24803	-1.43041
2	10	0	0	0	27	-0.429863	-1.22271
2	10	0	0	0	28	0.455189	-0.892896
2	10	0	0	0	29	-1.10462	-1.35087
2	10	0	0	0	30	-1.06301	-1.35996
2	10	0	0	1	31	-0.141879	-1.31152
2	10	0	0	1	32	0.150192	-0.978566
2	10	0	0	1	33	-0.0280803	-1.20101
2	10	0	0	1	34	-0.754438	-1.18666
2	10	0	0	1	35	-1.25855	-1.08021
2	10	0	0	1	36	0.53881	-1.21243
2	10	0	0	1	37	-0.648865	-1.18822
2	10	0	0	1	38	-1.25682	-1.69088
2	10	0	0	1	39	NaN	NaN
2	10	0	0	1	40	-0.965032	-1.08469
2	10	0	0	1	41	-0.484367	-0.770803
2	10	0	0	1	42	-0.730839	-1.10475
2	10	0	0	1	43	-0.841186	-0.926898
2	10	0	0	1	44	0.324592	-0.538055
2	10	0	0	1	45	-0.493626	-0.421946
2	10	0	0	1	46	0.104674	-0.356641
2	10	0	0	1	47	-0.216276	-0.0798986
2	10	0	0	1	48	0.49768	-0.14823
2	10	0	0	1	49	-0.342325	-0.0238867
2	10	0	0	1	50	0.136749	-0.118319
2	10	0	0	1	51	-0.301499	-0.165573
2	10	0	0	1	52	-0.125372	-0.17874
2	10	0	0	1	53	0.22909	-0.486404
2	10	0	0	1	54	0.111642	0.0387475
2	10	1	0	0	1	-0.575051	-0.0584947
2	10	1	0	0	2	-0.0912917	0.115904
2	10	1	0	0	3	0.0517187	-0.0404813
2	10	1	0	0	4	0.110809	0.205494
2	10	1	0	0	5	-0.0249346	0.230305
2	10	1	0	0	6	-0.110057	0.138363
2	10	1	0	0	7	-0.865348	0.00709228
2	10	1	0	0	8	0.0154936	0.479502
2	10	1	0	0	9	0.133053	0.2221
2	10	1	0	0	10	-0.113356	0.573092
2	10	1	0	0	11	0.493564	0.419496
2	10	1	0	0	12	0.690367	0.776787
2	10	1	0	0	13	0.110107	0.428991
2	10	1	0	0	14	0.0801529	0.905769
2	10	1	0	0	15	-0.226713	0.847133
2	10	1	0	0	16	0.842669	1.15257
2	10	1	0	0	17	1.06436	1.46272
2	10	1	0	0	18	-0.503068	1.13145
2	10	1	0	0	19	-0.503689	0.780134
2	10	1	0	0	20	0.934667	1.31869
2	10	1	0	0	21	-0.726015	0.641252
2	10	1	0	0	22	-0.088414	1.3532
2	10	1	0	0	23	-0.445284	1.44612
2	10	1	0	0	24	0.170219	0.527357
2	10	1	0	0	25	0.442996	0.809099
2	10	1	0	0	26	0.211983	0.94129
2	10	1	0	0	27	-0.445927	0.888644
2	10	1	0	0	28	0.422546	0.911353
2	10	1	0	0	29	0.225056	1.12469
2	10	1	0	0	30	-0.113977	1.07642
2	10	1	0	1	31	-0.113467	1.13527
2	10	1	0	1	32	0.732246	1.1513
2	10	1	0	1	33	0.729735	1.17124
2	10	1	0	1	34	-0.569957	0.723216
2	10	1	0	1	35	0.877923	1.09938
2	10	1	0	1	36	0.345782	0.865981
2	10	1	0	1	37	0.724627	1.19044
2	10	1	0	1	38	0.0365047	1.43794
2	10	1	0	1	39	0.647506	1.26146
2	10	1	0	1	40	1.31767	0.919729
2	10	1	0	1	41	-0.420606	0.366348
2	10	1	0	1	42	0.817525	1.09474
2	10	1	0	1	43	0.191413	0.899823
2	10	1	0	1	44	0.306275	0.589719
2	10	1	0	1	45	0.18957	0.445641
2	10	1	0	1	46	0.19165	0.466679
2	10	1	0	1	47	0.0746843	0.303546
2	10	1	0	1	48	-0.132261	0.0242363
2	10	1	0	1	49	-0.186582	0.0729996
2	10	1	0	1	50	-0.249665	0.0956443
2	10	1	0	1	51	-0.650201	0.0469923
2	10	1	0	1	52	-0.426205	0.225521
2	10	1	0	1	53	0.693923	0.188131
2	10	1	0	1	54	0.148048	0.0479091
2	11	0	0	0	1	0.172358	-0.0367043
2	11	0	0	0	2	-0.377372	-0.220394
2	11	0	0	0	3	0.638297	-0.113972
2	11	0	0	0	4	-0.546586	-0.245103
2	11	0	0	0	5	-0.667604	-0.304001
2	11	0	0	0	6	-0.40276	-0.335619
2	11	0	0	0	7	0.125059	-0.504659
2	11	0	0	0	8	0.0417739	-0.667404
2	11	0	0	0	9	-0.880725	-0.757428
2	11	0	0	0	10	-2.21816	-1.66393
2	11	0	0	0	11	-0.627724	-1.2184
2	11	0	0	0	12	0.557404	-0.548551
2	11	0	0	0	13	0.781824	-0.537897
2	11	0	0	0	14	-0.170206	-0.800788
2	11	0	0	0	15	-0.781198	-1.31771
2	11	0	0	0	16	-0.986221	-1.35289
2	11	0	0	0	17	0.056521	-0.909325
2	11	0	0	0	18	0.17187	-0.986331
2	11	0	0	0	19	-0.400316	-1.09485
2	11	0	0	0	20	-1.20322	-2.04036
2	11	0	0	0	21	-0.774462	-1.64277
2	11	0	0	0	22	-0.0291178	-0.877473
2	11	0	0	0	23	0.411966	-1.15285
2	11	0	0	0	24	-0.656211	-1.17108
2	11	0	0	0	25	-0.530814	-1.25466
2	11	0	0	0	26	-1.47282	-1.65362
2	11	0	0	0	27	-0.107203	-1.18802
2	11	0	0	0	28	-0.53821	-1.78978
2	11	0	0	0	29	-0.493435	-1.71614
2	11	0	0	0	30	-0.334877	-1.34923
2	11	0	0	1	31	-0.761455	-1.42105
2	11	0	0	1	32	-0.501927	-1.12761
2	11	0	0	1	33	-0.500743	-1.14637
2	11	0	0	1	34	-0.667082	-1.41739
2	11	0	0	1	35	-0.978961	-1.45331
2	11	0	0	1	36	-1.06339	-1.17499
2	11	0	0	1	37	-0.0800133	-0.986008
2	11	0	0	1	38	0.233363	-1.03111
2	11	0	0	1	39	-0.292682	-0.907279
2	11	0	0	1	40	-0.406459	-0.440083
2	11	0	0	1	41	-0.310088	-0.765468
2	11	0	0	1	42	-0.170349	-0.578558
2	11	0	0	1	43	-0.148694	-0.561346
2	11	0	0	1	44	-0.421664	-0.582023
2	11	0	0	1	45	-0.662672	-0.498088
2	11	0	0	1	46	1.27818	-0.393901
2	11	0	0	1	47	-0.0708637	-0.496552
2	11	0	0	1	48	0.389936	0.201146
2	11	0	0	1	49	0.996012	0.174374
2	11	0	0	1	50	-1.37142	-1.09454
2	11	0	0	1	51	1.04085	-0.0795969
2	11	0	0	1	52	0.62472	-0.119781
2	11	0	0	1	53	0.383893	-0.0525725
2	11	0	0	1	54	0.0965828	0.382333
2	11	1	0	0	1	-0.385492	-0.153265
2	11	1	0	0	2	-0.0719236	0.156783
2	11	1	0	0	3	-0.30982	-0.0132688
2	11	1	0	0	4	-0.289535	-0.141522
2	11	1	0	0	5	1.35183	0.825734
2	11	1	0	0	6	0.390109	0.302049
2	11	1	0	0	7	0.167908	-0.021663
2	11	1	0	0	8	-0.353874	-0.309004
2	11	1	0	0	9	-0.786448	-0.156433
2	11	1	0	0	10	-0.366508	0.203216
2	11	1	0	0	11	-0.990502	-0.0860101
2	11	1	0	0	12	-0.0052845	0.390697
2	11	1	0	0	13	0.0263772	0.295215
2	11	1	0	0	14	-0.132913	0.382927
2	11	1	0	0	15	-0.184931	0.42112
2	11	1	0	0	16	0.061944	0.699424
2	11	1	0	0	17	-0.231836	0.609479
2	11	1	0	0	18	0.25017	0.321917
2	11	1	0	0	19	-0.221412	0.224592
2	11	1	0	0	20	0.374595	0.585109
2	11	1	0	0	21	0.535176	0.451137
2	11	1	0	0	22	0.139252	0.66055
2	11	1	0	0	23	0.907102	0.576695
2	11	1	0	0	24	-0.0848198	0.40133
2	11	1	0	0	25	0.758977	0.540329
2	11	1	0	0	26	0.139651	0.895845
2	11	1	0	0	27	-0.113487	0.00118699
2	11	1	0	0	28	-0.0149093	0.43776
2	11	1	0	0	29	0.723774	0.599309
2	11	1	0	0	30	-0.0277324	0.347381
2	11	1	0	1	31	0.478489	0.29052
2	11	1	0	1	32	0.806119	0.659544
2	11	1	0	1	33	0.392332	0.702694
2	11	1	0	1	34	0.789921	0.860414
2	11	1	0	1	35	0.603967	0.635022
2	11	1	0	1	36	1.13403	0.997206
2	11	1	0	1	37	0.468136	0.904385
2	11	1	0	1	38	0.88825	0.619712
2	11	1	0	1	39	1.18316	0.861915
2	11	1	0	1	40	0.412218	0.440876
2	11	1	0	1	41	0.367488	0.24436
2	11	1	0	1	42	0.887451	0.65559
2	11	1	0	1	43	-0.0757298	0.726154
2	11	1	0	1	44	0.956201	0.508146
2	11	1	0	1	45	0.384105	0.37323
2	11	1	0	1	46	0.286797	0.222569
2	11	1	0	1	47	-0.132918	0.241842
2	11	1	0	1	48	0.238083	0.331572
2	11	1	0	1	49	0.274109	-0.135068
2	11	1	0	1	50	0.595837	0.0302146
2	11	1	0	1	51	0.421222	0.118798
2	11	1	0	1	52	-0.0176761	-0.17096
2	11	1	0	1	53	0.154254	-0.182445
2	11	1	0	1	54	1.07231	0.326075
2	12	0	0	0	1	0.714683	-0.0736013
2	12	0	0	0	2	0.179018	-0.101287
2	12	0	0	0	3	-0.34046	-0.119257
2	12	0	0	0	4	-0.532605	-0.204607
2	12	0	0	0	5	-0.527102	-0.17617
2	12	0	0	0	6	-0.67033	-0.369912
2	12	0	0	0	7	-0.818961	-0.903936
2	12	0	0	0	8	-0.677541	-0.679458
2	12	0	0	0	9	-0.0915681	-0.720103
2	12	0	0	0	10	-0.724353	-0.688304
2	12	0	0	0	11	-1.42552	-0.952722
2	12	0	0	0	12	-1.43932	-1.06866
2	12	0	0	0	13	-0.735714	-1.01034
2	12	0	0	0	14	-0.853118	-1.40725
2	12	0	0	0	15	-0.79833	-0.682139
2	12	0	0	0	16	-0.895169	-1.09786
2	12	0	0	0	17	-0.738611	-1.07622
2	12	0	0	0	18	-1.00728	-1.4671
2	12	0	0	0	19	-0.789501	-1.10362
2	12	0	0	0	20	-0.736787	-2.13601
2	12	0	0	0	21	-0.855901	-1.59954
2	12	0	0	0	22	-0.0453879	-1.69281
2	12	0	0	0	23	-0.431519	-1.97408
2	12	0	0	0	24	-0.826164	-1.48814
2	12	0	0	0	25	0.220172	-1.57426
2	12	0	0	0	26	-0.559232	-1.36537
2	12	0	0	0	27	-0.244224	-1.08725
2	12	0	0	0	28	-0.20345	-1.40098
2	12	0	0	0	29	0.511232	-1.76381
2	12	0	0	0	30	-0.500168	-1.47408
2	12	0	0	1	31	-0.762785	-1.65401
2	12	0	0	1	32	-0.740512	-1.41628
2	12	0	0	1	33	-0.317409	-1.14824
2	12	0	0	1	34	0.201102	-1.06279
2	12	0	0	1	35	-0.400383	-1.10035
2	12	0	0	1	36	-0.459588	-1.31759
2	12	0	0	1	37	0.255753	-1.35394
2	12	0	0	1	38	-0.420693	-1.1618
2	12	0	0	1	39	-0.429712	-0.830688
2	12	0	0	1	40	-0.590971	-1.03568
2	12	0	0	1	41	0.163901	-0.702669
2	12	0	0	1	42	0.0458284	-0.691922
2	12	0	0	1	43	-0.276504	-0.589071
2	12	0	0	1	44	0.150094	-0.594132
2	12	0	0	1	45	-0.136342	-0.504588
2	12	0	0	1	46	-0.339317	-0.573768
2	12	0	0	1	47	0.0928142	-0.217327
2	12	0	0	1	48	0.379752	-0.114278
2	12	0	0	1	49	0.229626	-0.430844
2	12	0	0	1	50	1.3804	-0.0103097
2	12	0	0	1	51	0.15223	0.0470702
2	12	0	0	1	52	0.32686	0.173387
2	12	0	0	1	53	0.198449	0.0394245
2	12	0	0	1	54	0.106884	-0.190673
2	12	1	0	0	1	0.311711	0.201752
2	12	1	0	0	2	0.0675834	0.177398
2	12	1	0	0	3	0.67445	-0.396979
2	12	1	0	0	4	-0.115868	0.185697
2	12	1	0	0	5	0.737845	0.26651
2	12	1	0	0	6	-0.0707768	0.152203
2	12	1	0	0	7	1.61801	0.348231
2	12	1	0	0	8	1.3424	0.713172
2	12	1	0	0	9	0.874839	0.649334
2	12	1	0	0	10	1.93178	0.776676
2	12	1	0	0	11	0.693228	0.63473
2	12	1	0	0	12	0.254704	0.480072
2	12	1	0	0	13	0.627673	0.714974
2	12	1	0	0	14	0.241393	0.868816
2	12	1	0	0	15	0.0971486	0.628293
2	12	1	0	0	16	1.06949	1.13368
2	12	1	0	0	17	0.470786	0.832522
2	12	1	0	0	18	0.784118	0.93359
2	12	1	0	0	19	0.484366	1.22507
2	12	1	0	0	20	0.389951	1.05871
2	12	1	0	0	21	0.437579	0.639051
2	12	1	0	0	22	1.47872	0.991886
2	12	1	0	0	23	0.247647	0.977286
2	12	1	0	0	24	0.895017	1.07981
2	12	1	0	0	25	1.86872	1.37572
2	12	1	0	0	26	1.30697	1.48211
2	12	1	0	0	27	1.5584	1.08295
2	12	1	0	0	28	0.385602	1.29291
2	12	1	0	0	29	1.27953	1.6242
2	12	1	0	0	30	1.71872	1.76112
2	12	1	0	1	31	0.418352	1.19108
2	12	1	0	1	32	0.775691	1.0637
2	12	1	0	1	33	0.427138	1.0414
2	12	1	0	1	34	1.111	1.22688
2	12	1	0	1	35	0.336578	1.61803
2	12	1	0	1	36	0.609856	0.780909
2	12	1	0	1	37	0.111483	0.887083
2	12	1	0	1	38	-0.177305	0.670587
2	12	1	0	1	39	1.3785	0.971898
2	12	1	0	1	40	1.20513	1.18019
2	12	1	0	1	41	0.940467	0.914778
2	12	1	0	1	42	0.382923	0.735054
2	12	1	0	1	43	0.246153	0.64274
2	12	1	0	1	44	0.00024429	0.554475
2	12	1	0	1	45	0.0965465	0.52252
2	12	1	0	1	46	1.44907	0.370773
2	12	1	0	1	47	-0.745817	-0.061152
2	12	1	0	1	48	0.631043	0.199668
2	12	1	0	1	49	0.175785	0.392391
2	12	1	0	1	50	-0.385164	-0.202264
2	12	1	0	1	51	-0.235949	0.067206
2	12	1	0	1	52	-0.418879	-0.0337276
2	12	1	0	1	53	0.164354	0.0861636
2	12	1	0	1	54	0.189872	0.120784
2	13	0	0	0	1	1.18451	-0.094824
2	13	0	0	0	2	-0.225575	-0.0851331
2	13	0	0	0	3	-0.755287	-0.26647
2	13	0	0	0	4	-0.114365	-0.290648
2	13	0	0	0	5	-0.532634	-0.33468
2	13	0	0	0	6	-0.156812	-0.395568
2	13	0	0	0	7	0.810013	-0.133453
2	13	0	0	0	8	-0.272048	-0.461394
2	13	0	0	0	9	-0.161371	-0.658213
2	13	0	0	0	10	-0.930047	-0.582741
2	13	0	0	0	11	0.939368	-0.408948
2	13	0	0	0	12	-0.763617	-0.697963
2	13	0	0	0	13	-0.438821	-0.895895
2	13	0	0	0	14	-0.726501	-0.722178
2	13	0	0	0	15	-0.466861	-1.00715
2	13	0	0	0	16	-0.785329	-1.00835
2	13	0	0	0	17	-0.986458	-1.10127
2	13	0	0	0	18	0.970197	-1.10203
2	13	0	0	0	19	-0.978103	-1.20461
2	13	0	0	0	20	-1.0159	-1.22856
2	13	0	0	0	21	-0.566834	-1.40537
2	13	0	0	0	22	0.843082	-1.23481
2	13	0	0	0	23	0.0762261	-1.01279
2	13	0	0	0	24	-0.878425	-1.10374
2	13	0	0	0	25	-1.08285	-1.4974
2	13	0	0	0	26	-0.988876	-1.54575
2	13	0	0	0	27	-0.546334	-1.2965
2	13	0	0	0	28	-0.280307	-1.96277
2	13	0	0	0	29	-0.56891	-1.18272
2	13	0	0	0	30	-1.13664	-1.2097
2	13	0	0	1	31	0.556643	-1.26061
2	13	0	0	1	32	0.0908601	-1.15678
2	13	0	0	1	33	-0.0841337	-1.16302
2	13	0	0	1	34	-1.10101	-0.892015
2	13	0	0	1	35	-0.831277	-1.18294
2	13	0	0	1	36	-0.232597	-1.1078
2	13	0	0	1	37	-0.0771735	-0.743504
2	13	0	0	1	38	1.19849	-0.894719
2	13	0	0	1	39	-0.169465	-0.947806
2	13	0	0	1	40	0.479505	-0.745148
2	13	0	0	1	41	-0.3116	-0.775424
2	13	0	0	1	42	-0.837835	-0.599434
2	13	0	0	1	43	-0.289418	-0.734812
2	13	0	0	1	44	0.962467	-0.73701
2	13	0	0	1	45	-0.773478	-0.674485
2	13	0	0	1	46	1.07922	-0.570505
2	13	0	0	1	47	0.0285349	-0.458812
2	13	0	0	1	48	-0.800352	-0.608681
2	13	0	0	1	49	-0.457974	-0.167041
2	13	0	0	1	50	-0.264086	-0.482456
2	13	0	0	1	51	0.548163	-0.235024
2	13	0	0	1	52	0.684686	-0.473029
2	13	0	0	1	53	0.582959	-0.131224
2	13	0	0	1	54	0.115337	-0.0293911
2	13	1	0	0	1	1.08776	-0.120916
2	13	1	0	0	2	0.517348	0.0920673
2	13	1	0	0	3	1.04536	-0.0293051
2	13	1	0	0	4	-0.0170547	-0.137154
2	13	1	0	0	5	-0.319981	-0.0969405
2	13	1	0	0	6	0.503945	-0.181726
2	13	1	0	0	7	0.694724	0.128811
2	13	1	0	0	8	0.951029	-0.00302177
2	13	1	0	0	9	0.778423	0.0633471
2	13	1	0	0	10	-0.25408	-0.0336602
2	13	1	0	0	11	-0.0873775	0.196403
2	13	1	0	0	12	-0.207157	0.0836512
2	13	1	0	0	13	-1.10522	-0.44017
2	13	1	0	0	14	1.65292	0.583557
2	13	1	0	0	15	1.41912	0.33092
2	13	1	0	0	16	1.45652	0.431464
2	13	1	0	0	17	0.687962	0.399645
2	13	1	0	0	18	0.0363708	0.249034
2	13	1	0	0	19	0.0453541	0.610966
2	13	1	0	0	20	-0.493641	0.0354818
2	13	1	0	0	21	0.610247	0.427715
2	13	1	0	0	22	-0.311628	1.02789
2	13	1	0	0	23	-0.0785903	0.59887
2	13	1	0	0	24	0.593874	0.335832
2	13	1	0	0	25	0.884292	0.503621
2	13	1	0	0	26	0.899588	0.905145
2	13	1	0	0	27	-0.0656712	0.769793
2	13	1	0	0	28	1.54671	1.39988
2	13	1	0	0	29	0.995339	0.703668
2	13	1	0	0	30	-0.641027	0.452627
2	13	1	0	1	31	0.268658	1.34369
2	13	1	0	1	32	1.53148	0.750005
2	13	1	0	1	33	1.67893	1.39144
2	13	1	0	1	34	0.69259	0.548831
2	13	1	0	1	35	1.37934	0.912942
2	13	1	0	1	36	1.11791	1.07783
2	13	1	0	1	37	1.81119	1.17065
2	13	1	0	1	38	1.32272	0.89479
2	13	1	0	1	39	0.791256	0.46612
2	13	1	0	1	40	0.354985	0.772641
2	13	1	0	1	41	0.285708	0.397976
2	13	1	0	1	42	1.38785	0.755318
2	13	1	0	1	43	0.291394	0.460917
2	13	1	0	1	44	1.12745	0.273554
2	13	1	0	1	45	0.244011	0.358062
2	13	1	0	1	46	1.10361	0.315904
2	13	1	0	1	47	2.47667	0.841554
2	13	1	0	1	48	-0.578124	-0.0983653
2	13	1	0	1	49	-0.0188289	0.000326671
2	13	1	0	1	50	-0.12197	0.145126
2	13	1	0	1	51	-0.564553	-0.000268458
2	13	1	0	1	52	0.0569692	0.179313
2	13	1	0	1	53	0.195767	0.239811
2	13	1	0	1	54	1.03376	0.112826
2	14	0	0	0	1	1.26447	-0.111579
2	14	0	0	0	2	1.33812	0.244729
2	14	0	0	0	3	1.10579	0.0780249
2	14	0	0	0	4	1.19672	0.00503676
2	14	0	0	0	5	0.114843	-0.347654
2	14	0	0	0	6	1.1527	-0.284856
2	14	0	0	0	7	0.244265	-0.203711
2	14	0	0	0	8	-0.161273	-0.562974
2	14	0	0	0	9	-0.330563	-0.548609
2	14	0	0	0	10	0.446242	-0.579484
2	14	0	0	0	11	0.330881	-0.89169
2	14	0	0	0	12	-0.0726915	-0.818257
2	14	0	0	0	13	0.242519	-0.847237
2	14	0	0	0	14	0.10121	-0.889343
2	14	0	0	0	15	-0.322071	-1.12741
2	14	0	0	0	16	0.985549	-0.949707
2	14	0	0	0	17	-0.286705	-1.5169
2	14	0	0	0	18	-0.0759152	-0.930676
2	14	0	0	0	19	0.340635	-1.43861
2	14	0	0	0	20	-0.729692	-1.23539
2	14	0	0	0	21	-0.30791	-1.05377
2	14	0	0	0	22	0.578615	-1.09266
2	14	0	0	0	23	-0.0935082	-1.35787
2	14	0	0	0	24	0.939495	-1.04949
2	14	0	0	0	25	0.865304	-1.05171
2	14	0	0	0	26	0.0559994	-1.30836
2	14	0	0	0	27	1.40471	-1.10011
2	14	0	0	0	28	0.281586	-1.46452
2	14	0	0	0	29	0.191394	-1.12819
2	14	0	0	0	30	-0.203734	-1.52433
2	14	0	0	1	31	0.175782	-1.27649
2	14	0	0	1	32	0.457984	-1.21748
2	14	0	0	1	33	0.435611	-1.04796
2	14	0	0	1	34	0.182036	-0.97895
2	14	0	0	1	35	0.0594725	-1.03925
2	14	0	0	1	36	0.909317	-0.736714
2	14	0	0	1	37	0.355611	-1.08527
2	14	0	0	1	38	-0.0667444	-0.790702
2	14	0	0	1	39	-0.0597327	-1.12996
2	14	0	0	1	40	0.118189	-0.64404
2	14	0	0	1	41	0.584906	-0.661306
2	14	0	0	1	42	0.0913045	-0.513229
2	14	0	0	1	43	0.990768	-0.536287
2	14	0	0	1	44	1.14632	-0.243787
2	14	0	0	1	45	1.36473	-0.253882
2	14	0	0	1	46	0.759994	-0.159046
2	14	0	0	1	47	0.772316	-0.274346
2	14	0	0	1	48	1.31675	0.116994
2	14	0	0	1	49	0.576457	0.0520551
2	14	0	0	1	50	0.272404	-0.207487
2	14	0	0	1	51	0.239704	0.0187144
2	14	0	0	1	52	0.655968	-0.0998768
2	14	0	0	1	53	0.497741	-0.182247
2	14	0	0	1	54	0.387607	-0.0435943
2	14	1	0	0	1	1.31074	0.463287
2	14	1	0	0	2	0.642145	0.205264
2	14	1	0	0	3	1.01873	0.161158
2	14	1	0	0	4	0.967322	0.279108
2	14	1	0	0	5	0.36968	0.130192
2	14	1	0	0	6	0.880494	0.271364
2	14	1	0	0	7	-0.326551	-0.20902
2	14	1	0	0	8	0.288999	0.38635
2	14	1	0	0	9	0.509928	0.201566
2	14	1	0	0	10	0.609738	0.456717
2	14	1	0	0	11	0.528299	0.342911
2	14	1	0	0	12	-0.148224	0.298583
2	14	1	0	0	13	1.02277	0.698266
2	14	1	0	0	14	0.842827	0.932885
2	14	1	0	0	15	1.50125	1.02757
2	14	1	0	0	16	1.48801	1.84432
2	14	1	0	0	17	1.76254	1.20939
2	14	1	0	0	18	0.635196	0.935301
2	14	1	0	0	19	1.06123	1.19223
2	14	1	0	0	20	0.944556	1.23663
2	14	1	0	0	21	0.914501	1.8407
2	14	1	0	0	22	0.98824	1.09759
2	14	1	0	0	23	1.50396	1.4578
2	14	1	0	0	24	1.54997	1.15104
2	14	1	0	0	25	-0.0176946	1.18485
2	14	1	0	0	26	1.45863	1.19431
2	14	1	0	0	27	0.719864	1.16216
2	14	1	0	0	28	1.58764	1.79242
2	14	1	0	0	29	-0.144546	1.29636
2	14	1	0	0	30	1.06783	1.31927
2	14	1	0	1	31	0.656867	1.16167
2	14	1	0	1	32	0.388693	1.0729
2	14	1	0	1	33	0.990466	1.06327
2	14	1	0	1	34	0.404366	0.668221
2	14	1	0	1	35	1.09617	1.05771
2	14	1	0	1	36	1.50524	1.12203
2	14	1	0	1	37	1.34389	0.695791
2	14	1	0	1	38	0.640078	0.624853
2	14	1	0	1	39	0.134369	0.781156
2	14	1	0	1	40	1.87702	1.13838
2	14	1	0	1	41	0.145453	0.554455
2	14	1	0	1	42	0.926828	0.558048
2	14	1	0	1	43	1.33558	0.961585
2	14	1	0	1	44	0.577899	0.429112
2	14	1	0	1	45	0.809005	0.403132
2	14	1	0	1	46	0.918046	0.364829
2	14	1	0	1	47	0.0631268	0.0838232
2	14	1	0	1	48	1.23174	0.28669
2	14	1	0	1	49	0.600368	0.175211
2	14	1	0	1	50	-0.297877	-0.0977482
2	14	1	0	1	51	0.206591	-0.0849331
2	14	1	0	1	52	1.10624	0.100638
2	14	1	0	1	53	0.515616	0.0870913
2	14	1	0	1	54	0.329888	0.0409867
2	15	0	0	0	1	0.067058	0.161562
2	15	0	0	0	2	-0.366709	-0.390103
2	15	0	0	0	3	-0.380816	-0.640809
2	15	0	0	0	4	-1.08895	-0.54949
2	15	0	0	0	5	-1.14463	-0.664387
2	15	0	0	0	6	-1.24428	-0.697163
2	15	0	0	0	7	-1.88391	-0.628283
2	15	0	0	0	8	-0.866289	-0.783141
2	15	0	0	0	9	-1.39378	-1.03255
2	15	0	0	0	10	-2.05214	-1.74915
2	15	0	0	0	11	-1.7348	-1.37615
2	15	0	0	0	12	-1.07227	-1.00208
2	15	0	0	0	13	-0.49593	-0.7913
2	15	0	0	0	14	-0.696055	-0.856117
2	15	0	0	0	15	-1.13397	-0.787329
2	15	0	0	0	16	-1.60987	-1.35713
2	15	0	0	0	17	-2.25997	-1.75455
2	15	0	0	0	18	-1.19655	-1.24189
2	15	0	0	0	19	-0.363455	-1.33411
2	15	0	0	0	20	-1.82682	-1.31021
2	15	0	0	0	21	-1.65566	-1.28431
2	15	0	0	0	22	-1.18298	-1.49552
2	15	0	0	0	23	-0.75145	-1.07404
2	15	0	0	0	24	-0.471558	-1.57033
2	15	0	0	0	25	-0.951214	-1.54273
2	15	0	0	0	26	-0.494405	-1.26097
2	15	0	0	0	27	-1.76712	-1.33498
2	15	0	0	0	28	-2.48371	-1.67309
2	15	0	0	0	29	-0.745587	-1.06167
2	15	0	0	0	30	0.290686	-0.97641
2	15	0	0	1	31	-3.1457	-2.20473
2	15	0	0	1	32	-2.5266	-2.23046
2	15	0	0	1	33	-1.19737	-1.61287
2	15	0	0	1	34	-0.400015	-1.22754
2	15	0	0	1	35	-1.00997	-1.31701
2	15	0	0	1	36	-0.926234	-0.981322
2	15	0	0	1	37	-0.401841	-1.30373
2	15	0	0	1	38	-1.18947	-1.2547
2	15	0	0	1	39	-0.585806	-0.94402
2	15	0	0	1	40	-1.39335	-1.00997
2	15	0	0	1	41	-0.77414	-0.994338
2	15	0	0	1	42	-1.74492	-1.45564
2	15	0	0	1	43	-0.286645	-0.676175
2	15	0	0	1	44	-1.12156	-0.768714
2	15	0	0	1	45	-1.55746	-0.869052
2	15	0	0	1	46	-1.40669	-0.850291
2	15	0	0	1	47	-0.0738673	-0.633291
2	15	0	0	1	48	-0.401105	-0.405864
2	15	0	0	1	49	0.46377	-0.264397
2	15	0	0	1	50	0.331244	-0.242241
2	15	0	0	1	51	-0.372181	-0.314299
2	15	0	0	1	52	-0.134518	-0.366431
2	15	0	0	1	53	0.0306248	-0.435559
2	15	0	0	1	54	0.672918	-0.0105103
2	15	1	0	0	1	0.257205	-0.193649
2	15	1	0	0	2	-0.630652	-0.0915763
2	15	1	0	0	3	0.357449	-0.166527
2	15	1	0	0	4	0.420674	0.310839
2	15	1	0	0	5	0.290865	0.265801
2	15	1	0	0	6	0.513484	0.358321
2	15	1	0	0	7	0.398659	0.0126436
2	15	1	0	0	8	0.337757	0.0016684
2	15	1	0	0	9	0.0445206	0.199617
2	15	1	0	0	10	-0.909667	-0.035618
2	15	1	0	0	11	-2.86068	-0.963778
2	15	1	0	0	12	0.372959	0.265737
2	15	1	0	0	13	0.159681	0.499615
2	15	1	0	0	14	1.18288	0.543444
2	15	1	0	0	15	0.203458	0.484659
2	15	1	0	0	16	-0.275509	0.330006
2	15	1	0	0	17	-0.122913	0.469111
2	15	1	0	0	18	-0.406791	0.57697
2	15	1	0	0	19	0.449604	0.823054
2	15	1	0	0	20	0.538601	1.03048
2	15	1	0	0	21	0.452187	0.967772
2	15	1	0	0	22	0.0899721	0.329624
2	15	1	0	0	23	0.816983	0.901797
2	15	1	0	0	24	1.59455	1.31919
2	15	1	0	0	25	0.880772	0.983241
2	15	1	0	0	26	0.111451	0.854434
2	15	1	0	0	27	0.399345	0.827305
2	15	1	0	0	28	-0.578372	0.414374
2	15	1	0	0	29	0.212462	0.662505
2	15	1	0	0	30	0.478912	0.751505
2	15	1	0	1	31	0.794743	0.944808
2	15	1	0	1	32	-1.82295	-0.448491
2	15	1	0	1	33	0.766836	1.00263
2	15	1	0	1	34	0.405785	0.793121
2	15	1	0	1	35	-0.727847	0.459356
2	15	1	0	1	36	0.242547	1.14106
2	15	1	0	1	37	0.191123	0.825661
2	15	1	0	1	38	0.197676	0.311534
2	15	1	0	1	39	-0.110694	0.211942
2	15	1	0	1	40	0.756382	0.563688
2	15	1	0	1	41	1.03621	0.681812
2	15	1	0	1	42	-0.348674	0.0729747
2	15	1	0	1	43	-0.626022	0.245449
2	15	1	0	1	44	0.00747198	0.236501
2	15	1	0	1	45	0.845765	0.627179
2	15	1	0	1	46	0.146831	0.0967962
2	15	1	0	1	47	-0.593904	-0.13273
2	15	1	0	1	48	0.856977	0.384212
2	15	1	0	1	49	0.214223	-0.0416652
2	15	1	0	1	50	-1.12406	-0.432413
2	15	1	0	1	51	-0.15113	0.15379
2	15	1	0	1	52	-0.878644	-0.0890743
2	15	1	0	1	53	-1.02054	-0.477526
2	15	1	0	1	54	-0.543619	0.0698751
2	16	0	0	0	1	-0.679249	-0.0141783
2	16	0	0	0	2	-0.0147694	0.006711
2	16	0	0	0	3	-0.457703	-0.268636
2	16	0	0	0	4	-0.0752785	-0.143487
2	16	0	0	0	5	-0.679443	0.0266654
2	16	0	0	0	6	-0.684229	-0.667828
2	16	0	0	0	7	-1.30551	-0.52352
2	16	0	0	0	8	-1.03515	-0.511857
2	16	0	0	0	9	-1.26945	-0.706497
2	16	0	0	0	10	-1.89003	-0.963537
2	16	0	0	0	11	-1.46058	-0.783784
2	16	0	0	0	12	-1.38924	-1.29823
2	16	0	0	0	13	-1.6267	-0.791199
2	16	0	0	0	14	-1.69535	-1.42312
2	16	0	0	0	15	-0.569987	-1.35537
2	16	0	0	0	16	-1.24395	-1.0912
2	16	0	0	0	17	-1.82722	-1.13294
2	16	0	0	0	18	-1.31657	-1.05639
2	16	0	0	0	19	-1.53325	-1.52338
2	16	0	0	0	20	-1.47509	-1.5137
2	16	0	0	0	21	-1.48683	-1.21562
2	16	0	0	0	22	-1.5725	-1.28798
2	16	0	0	0	23	-1.07332	-1.20793
2	16	0	0	0	24	-1.69326	-1.39799
2	16	0	0	0	25	-1.32803	-1.4263
2	16	0	0	0	26	-0.779384	-1.61973
2	16	0	0	0	27	-0.635207	-1.66698
2	16	0	0	0	28	-1.56019	-1.37609
2	16	0	0	0	29	0.339509	-0.829142
2	16	0	0	0	30	-1.06151	-1.40859
2	16	0	0	1	31	-0.721214	-1.42659
2	16	0	0	1	32	-1.4674	-1.24148
2	16	0	0	1	33	-1.62396	-1.46865
2	16	0	0	1	34	-1.65985	-1.71206
2	16	0	0	1	35	-1.21461	-1.49199
2	16	0	0	1	36	-1.34389	-0.988825
2	16	0	0	1	37	-1.39725	-0.942098
2	16	0	0	1	38	-0.724353	-0.880346
2	16	0	0	1	39	-1.1785	-0.943938
2	16	0	0	1	40	-1.40365	-1.58774
2	16	0	0	1	41	-1.39807	-0.739164
2	16	0	0	1	42	-0.78525	-0.975076
2	16	0	0	1	43	-0.950747	-0.817975
2	16	0	0	1	44	-1.30703	-0.688146
2	16	0	0	1	45	-0.116169	-0.666653
2	16	0	0	1	46	-0.48356	-0.223551
2	16	0	0	1	47	0.498761	-0.448891
2	16	0	0	1	48	-0.842528	-0.567179
2	16	0	0	1	49	-0.959234	-0.134359
2	16	0	0	1	50	0.657418	-0.0670746
2	16	0	0	1	51	-0.0537789	0.121961
2	16	0	0	1	52	0.188076	0.126045
2	16	0	0	1	53	-0.712672	-0.072405
2	16	0	0	1	54	-0.399153	-0.14368
2	16	1	0	0	1	-0.534897	-0.0344226
2	16	1	0	0	2	-1.03196	-0.401497
2	16	1	0	0	3	-0.630863	0.0697037
2	16	1	0	0	4	0.027489	0.342385
2	16	1	0	0	5	0.851762	0.370835
2	16	1	0	0	6	-0.525567	0.301383
2	16	1	0	0	7	0.48952	0.378226
2	16	1	0	0	8	0.113522	0.528118
2	16	1	0	0	9	1.30078	0.892592
2	16	1	0	0	10	-0.397077	0.504667
2	16	1	0	0	11	0.148951	0.502393
2	16	1	0	0	12	0.335234	0.85096
2	16	1	0	0	13	0.387458	0.542129
2	16	1	0	0	14	-0.392884	0.802672
2	16	1	0	0	15	0.901682	1.19825
2	16	1	0	0	16	0.56092	1.07486
2	16	1	0	0	17	0.509177	0.899797
2	16	1	0	0	18	-0.560937	1.02512
2	16	1	0	0	19	-0.0177637	1.20039
2	16	1	0	0	20	0.889357	1.54059
2	16	1	0	0	21	0.811382	1.14303
2	16	1	0	0	22	0.452587	1.24251
2	16	1	0	0	23	0.417505	1.59913
2	16	1	0	0	24	-0.192512	0.89301
2	16	1	0	0	25	0.375059	1.0789
2	16	1	0	0	26	0.0927898	0.981507
2	16	1	0	0	27	1.21845	2.0448
2	16	1	0	0	28	1.21882	1.37277
2	16	1	0	0	29	0.0895746	1.37823
2	16	1	0	0	30	-0.0506312	1.27159
2	16	1	0	1	31	0.345888	0.864603
2	16	1	0	1	32	0.466965	1.26223
2	16	1	0	1	33	0.488296	1.07582
2	16	1	0	1	34	0.941868	1.30008
2	16	1	0	1	35	0.754093	1.16334
2	16	1	0	1	36	0.726062	0.982922
2	16	1	0	1	37	0.37095	1.02376
2	16	1	0	1	38	0.445186	0.731758
2	16	1	0	1	39	-0.444495	0.747644
2	16	1	0	1	40	-0.411474	0.503907
2	16	1	0	1	41	-0.375343	0.839972
2	16	1	0	1	42	-0.347489	0.592005
2	16	1	0	1	43	-1.11528	0.475539
2	16	1	0	1	44	0.093532	0.622828
2	16	1	0	1	45	-1.23965	-0.0655054
2	16	1	0	1	46	-0.387447	0.264604
2	16	1	0	1	47	-0.298332	0.0669961
2	16	1	0	1	48	-1.24087	-0.403681
2	16	1	0	1	49	-0.43829	0.100183
2	16	1	0	1	50	-0.0979756	-0.0304258
2	16	1	0	1	51	-0.344592	0.114893
2	16	1	0	1	52	-1.43508	0.0449331
2	16	1	0	1	53	-1.01832	-0.192624
2	16	1	0	1	54	-1.30686	-0.218368
2	17	0	0	0	1	-0.224129	-0.112282
2	17	0	0	0	2	-0.0874634	-0.14562
2	17	0	0	0	3	0.773452	-0.176693
2	17	0	0	0	4	-0.237871	-0.27195
2	17	0	0	0	5	0.432324	-0.359732
2	17	0	0	0	6	0.713806	-0.144172
2	17	0	0	0	7	-0.550967	-0.617162
2	17	0	0	0	8	-0.757397	-0.492226
2	17	0	0	0	9	-1.01057	-0.993696
2	17	0	0	0	10	-0.701691	-0.740342
2	17	0	0	0	11	-0.407503	-0.720635
2	17	0	0	0	12	-0.141538	-0.764604
2	17	0	0	0	13	0.120251	-0.711006
2	17	0	0	0	14	-0.531633	-1.24218
2	17	0	0	0	15	-0.535842	-0.686222
2	17	0	0	0	16	1.11896	-1.40129
2	17	0	0	0	17	-1.53115	-1.48507
2	17	0	0	0	18	-1.35126	-1.76923
2	17	0	0	0	19	-1.30473	-1.57988
2	17	0	0	0	20	-0.643028	-1.55884
2	17	0	0	0	21	-1.29866	-1.69224
2	17	0	0	0	22	0.627635	-1.46127
2	17	0	0	0	23	0.17972	-1.49351
2	17	0	0	0	24	-0.337077	-1.63898
2	17	0	0	0	25	-0.280131	-1.43073
2	17	0	0	0	26	-0.591885	-1.74722
2	17	0	0	0	27	-0.103971	-1.35993
2	17	0	0	0	28	-0.811393	-1.47554
2	17	0	0	0	29	0.181592	-1.72321
2	17	0	0	0	30	-0.146821	-1.18287
2	17	0	0	1	31	-0.685882	-1.56909
2	17	0	0	1	32	-1.14892	-1.19713
2	17	0	0	1	33	-1.05398	-1.11706
2	17	0	0	1	34	-1.07544	-1.07097
2	17	0	0	1	35	-1.62213	-1.57178
2	17	0	0	1	36	-0.395899	-1.24678
2	17	0	0	1	37	-0.49196	-1.59259
2	17	0	0	1	38	0.146201	-1.05739
2	17	0	0	1	39	0.23924	-0.795856
2	17	0	0	1	40	-0.248217	-0.749171
2	17	0	0	1	41	-0.111963	-0.85726
2	17	0	0	1	42	0.0794863	-0.249741
2	17	0	0	1	43	0.0203476	-0.265348
2	17	0	0	1	44	-1.07525	-1.11552
2	17	0	0	1	45	0.880065	-0.407069
2	17	0	0	1	46	-0.470287	-0.534403
2	17	0	0	1	47	1.11578	-0.471344
2	17	0	0	1	48	0.48826	-0.332466
2	17	0	0	1	49	1.56129	0.165991
2	17	0	0	1	50	1.83551	0.244179
2	17	0	0	1	51	0.697808	0.0616628
2	17	0	0	1	52	-0.438346	-0.403309
2	17	0	0	1	53	0.93133	0.103867
2	17	0	0	1	54	1.75446	0.169537
2	17	1	0	0	1	-0.557787	-0.0407835
2	17	1	0	0	2	-0.555628	-0.315674
2	17	1	0	0	3	0.736566	-0.178566
2	17	1	0	0	4	0.351877	0.176709
2	17	1	0	0	5	-0.185808	-0.0336912
2	17	1	0	0	6	-0.514908	-0.12673
2	17	1	0	0	7	0.297976	0.114541
2	17	1	0	0	8	0.907981	0.649148
2	17	1	0	0	9	0.00266819	0.26831
2	17	1	0	0	10	-0.339637	0.375628
2	17	1	0	0	11	0.282005	0.365844
2	17	1	0	0	12	0.950449	0.493574
2	17	1	0	0	13	0.48995	0.525855
2	17	1	0	0	14	-0.000234688	0.479435
2	17	1	0	0	15	0.175632	0.564857
2	17	1	0	0	16	0.592185	1.16156
2	17	1	0	0	17	0.046485	0.542901
2	17	1	0	0	18	1.02257	1.07948
2	17	1	0	0	19	0.306345	0.94335
2	17	1	0	0	20	0.844913	0.993459
2	17	1	0	0	21	0.182692	0.819325
2	17	1	0	0	22	0.695251	0.921686
2	17	1	0	0	23	0.764909	1.47976
2	17	1	0	0	24	0.501644	1.06879
2	17	1	0	0	25	1.06116	1.36282
2	17	1	0	0	26	0.701096	1.34885
2	17	1	0	0	27	1.4445	0.682439
2	17	1	0	0	28	1.27351	1.56538
2	17	1	0	0	29	0.61249	1.32149
2	17	1	0	0	30	0.961483	0.809343
2	17	1	0	1	31	0.476279	0.821103
2	17	1	0	1	32	0.874663	1.31653
2	17	1	0	1	33	-0.0601671	0.828398
2	17	1	0	1	34	0.468579	1.19587
2	17	1	0	1	35	0.370331	0.889309
2	17	1	0	1	36	0.477475	1.12254
2	17	1	0	1	37	0.601308	0.929481
2	17	1	0	1	38	0.802302	1.10481
2	17	1	0	1	39	0.861712	0.825324
2	17	1	0	1	40	0.178045	0.760414
2	17	1	0	1	41	0.908182	0.558069
2	17	1	0	1	42	0.189487	0.331097
2	17	1	0	1	43	0.231584	0.4987
2	17	1	0	1	44	0.73993	0.349075
2	17	1	0	1	45	0.193975	0.19319
2	17	1	0	1	46	0.246981	0.0573836
2	17	1	0	1	47	-0.0957834	0.353253
2	17	1	0	1	48	-0.204957	-0.0592429
2	17	1	0	1	49	-0.163216	0.101962
2	17	1	0	1	50	-0.257195	-0.0399898
2	17	1	0	1	51	0.262969	-0.0572316
2	17	1	0	1	52	-0.445664	-0.0684191
2	17	1	0	1	53	-0.785662	-0.22837
2	17	1	0	1	54	-0.184675	-0.11133
2	18	0	0	0	1	0.716839	0.110396
2	18	0	0	0	2	0.415793	0.122115
2	18	0	0	0	3	0.602474	-0.106784
2	18	0	0	0	4	0.415822	-0.339229
2	18	0	0	0	5	-0.177374	-0.255978
2	18	0	0	0	6	-0.449916	-0.320427
2	18	0	0	0	7	-0.247335	-0.570075
2	18	0	0	0	8	-0.349807	-0.576125
2	18	0	0	0	9	0.356433	-0.572959
2	18	0	0	0	10	-0.988092	-0.685566
2	18	0	0	0	11	-0.153594	-0.802748
2	18	0	0	0	12	-1.16297	-0.79336
2	18	0	0	0	13	-0.933278	-0.753384
2	18	0	0	0	14	-1.02648	-0.80808
2	18	0	0	0	15	-1.26695	-0.805407
2	18	0	0	0	16	-1.18676	-1.0347
2	18	0	0	0	17	-1.01664	-1.24435
2	18	0	0	0	18	-1.19557	-0.885843
2	18	0	0	0	19	-1.89318	-1.50483
2	18	0	0	0	20	-0.340604	-1.02249
2	18	0	0	0	21	0.529922	-0.747951
2	18	0	0	0	22	-1.56993	-1.57094
2	18	0	0	0	23	-1.12592	-1.14734
2	18	0	0	0	24	-1.11083	-1.15826
2	18	0	0	0	25	-1.41176	-1.13013
2	18	0	0	0	26	-0.20287	-1.23386
2	18	0	0	0	27	-1.27164	-1.26722
2	18	0	0	0	28	-0.911386	-1.51817
2	18	0	0	0	29	-1.15741	-1.03156
2	18	0	0	0	30	-1.4019	-1.51873
2	18	0	0	1	31	-1.44431	-1.25775
2	18	0	0	1	32	-1.25716	-1.36329
2	18	0	0	1	33	0.138106	-0.941226
2	18	0	0	1	34	-0.879961	-1.20487
2	18	0	0	1	35	0.495855	0.0727239
2	18	0	0	1	36	-1.12186	-1.07147
2	18	0	0	1	37	-0.563505	-1.14021
2	18	0	0	1	38	-0.650452	-1.26058
2	18	0	0	1	39	-0.945159	-1.21457
2	18	0	0	1	40	-0.995559	-1.18944
2	18	0	0	1	41	-0.823087	-0.753675
2	18	0	0	1	42	-0.28698	-0.745773
2	18	0	0	1	43	-0.971701	-0.770092
2	18	0	0	1	44	-0.479176	-0.444844
2	18	0	0	1	45	-0.477711	-0.490216
2	18	0	0	1	46	0.0276461	-0.412822
2	18	0	0	1	47	-0.677105	-0.160085
2	18	0	0	1	48	0.334462	-0.118562
2	18	0	0	1	49	-0.514995	-1.01173
2	18	0	0	1	50	-0.338665	-0.328851
2	18	0	0	1	51	0.348154	-0.130952
2	18	0	0	1	52	0.0271094	-0.206097
2	18	0	0	1	53	-0.629753	-0.198075
2	18	0	0	1	54	-0.281879	-0.00903904
2	18	1	0	0	1	-0.318162	-0.126826
2	18	1	0	0	2	0.000905284	-0.0403588
2	18	1	0	0	3	0.756344	0.0610267
2	18	1	0	0	4	-0.14207	-0.0178114
2	18	1	0	0	5	0.299781	0.153754
2	18	1	0	0	6	0.522354	0.00985732
2	18	1	0	0	7	0.165583	0.344918
2	18	1	0	0	8	-0.233413	0.0393938
2	18	1	0	0	9	-0.275786	0.0873161
2	18	1	0	0	10	0.940564	0.223932
2	18	1	0	0	11	-0.0334464	0.417314
2	18	1	0	0	12	0.0127012	0.440962
2	18	1	0	0	13	0.309491	0.365044
2	18	1	0	0	14	-0.273027	0.246848
2	18	1	0	0	15	0.839087	0.516075
2	18	1	0	0	16	0.689165	0.398081
2	18	1	0	0	17	-0.283643	0.534162
2	18	1	0	0	18	0.621281	0.742794
2	18	1	0	0	19	1.02539	1.28241
2	18	1	0	0	20	0.742029	1.16931
2	18	1	0	0	21	-0.0179968	0.756417
2	18	1	0	0	22	0.786156	0.958498
2	18	1	0	0	23	-0.282323	0.535655
2	18	1	0	0	24	1.1625	0.641939
2	18	1	0	0	25	0.636759	0.660857
2	18	1	0	0	26	0.809361	0.76323
2	18	1	0	0	27	0.537101	0.385258
2	18	1	0	0	28	0.170056	0.483372
2	18	1	0	0	29	0.690598	0.70554
2	18	1	0	0	30	0.541515	0.884893
2	18	1	0	1	31	-0.266132	0.951582
2	18	1	0	1	32	0.781842	0.66715
2	18	1	0	1	33	-1.1305	0.00372812
2	18	1	0	1	34	0.687773	0.711774
2	18	1	0	1	35	-0.136623	0.588171
2	18	1	0	1	36	0.495565	0.76669
2	18	1	0	1	37	0.81619	0.967008
2	18	1	0	1	38	0.862439	0.864613
2	18	1	0	1	39	0.08143	0.644031
2	18	1	0	1	40	0.459191	0.744373
2	18	1	0	1	41	0.0982285	-0.00905888
2	18	1	0	1	42	0.883555	0.640568
2	18	1	0	1	43	1.32899	0.452417
2	18	1	0	1	44	-0.406783	0.474459
2	18	1	0	1	45	1.39689	0.6154
2	18	1	0	1	46	0.983302	0.40019
2	18	1	0	1	47	-0.0736892	0.218876
2	18	1	0	1	48	-0.00763095	0.0228943
2	18	1	0	1	49	0.903644	0.134484
2	18	1	0	1	50	-0.268065	0.0491969
2	18	1	0	1	51	0.223637	-0.0455192
2	18	1	0	1	52	-0.184847	0.27282
2	18	1	0	1	53	-0.33301	-0.0293223
2	18	1	0	1	54	0.111871	0.110624
2	19	0	0	0	1	-0.482194	-0.0961284
2	19	0	0	0	2	-1.03085	-0.393055
2	19	0	0	0	3	-1.3327	-0.336858
2	19	0	0	0	4	0.799089	-0.161332
2	19	0	0	0	5	-1.4396	-1.01916
2	19	0	0	0	6	-1.47326	-0.314751
2	19	0	0	0	7	0.323494	-0.329008
2	19	0	0	0	8	-0.843523	-0.537528
2	19	0	0	0	9	-1.57485	-0.760597
2	19	0	0	0	10	-0.292969	-0.605988
2	19	0	0	0	11	-1.7309	-0.831327
2	19	0	0	0	12	-0.265811	-0.827238
2	19	0	0	0	13	-0.31976	-0.906273
2	19	0	0	0	14	-0.566465	-0.79207
2	19	0	0	0	15	-0.283736	-0.619315
2	19	0	0	0	16	-1.49411	-1.13358
2	19	0	0	0	17	-0.40811	-1.39437
2	19	0	0	0	18	-1.43133	-1.13232
2	19	0	0	0	19	-1.31739	-1.07576
2	19	0	0	0	20	-1.30867	-1.49289
2	19	0	0	0	21	-1.27093	-1.19196
2	19	0	0	0	22	-1.42497	-1.41673
2	19	0	0	0	23	-1.5558	-1.32463
2	19	0	0	0	24	-0.789651	-1.73928
2	19	0	0	0	25	-1.85229	-1.3618
2	19	0	0	0	26	-0.936032	-1.14858
2	19	0	0	0	27	-2.14504	-1.55893
2	19	0	0	0	28	-1.11776	-1.28764
2	19	0	0	0	29	-0.90941	-1.33039
2	19	0	0	0	30	-1.67338	-1.53971
2	19	0	0	1	31	-1.51719	-1.42118
2	19	0	0	1	32	0.00923904	-1.39028
2	19	0	0	1	33	-1.61578	-1.29239
2	19	0	0	1	34	-1.39776	-1.38289
2	19	0	0	1	35	-1.45202	-1.10228
2	19	0	0	1	36	-1.29221	-1.26516
2	19	0	0	1	37	-1.45727	-1.553
2	19	0	0	1	38	-1.41301	-1.55554
2	19	0	0	1	39	-0.195825	-0.602659
2	19	0	0	1	40	-0.721103	-0.984586
2	19	0	0	1	41	-0.769641	-0.730567
2	19	0	0	1	42	-0.56649	-0.533678
2	19	0	0	1	43	-0.383236	-0.759604
2	19	0	0	1	44	-0.523002	-0.411334
2	19	0	0	1	45	-0.380515	-0.501561
2	19	0	0	1	46	0.288127	-0.410615
2	19	0	0	1	47	0.0624652	-0.202942
2	19	0	0	1	48	0.235019	0.0781617
2	19	0	0	1	49	0.541274	0.323218
2	19	0	0	1	50	0.381493	0.0978302
2	19	0	0	1	51	1.39562	0.0527657
2	19	0	0	1	52	0.222826	-0.134349
2	19	0	0	1	53	0.0838911	0.0337055
2	19	0	0	1	54	-0.484824	-0.254011
2	19	1	0	0	1	0.729815	0.123076
2	19	1	0	0	2	0.586064	-0.0700918
2	19	1	0	0	3	0.344891	0.145748
2	19	1	0	0	4	0.114321	0.127569
2	19	1	0	0	5	0.830794	0.269165
2	19	1	0	0	6	0.606382	0.103282
2	19	1	0	0	7	0.54863	0.277907
2	19	1	0	0	8	0.735475	0.831012
2	19	1	0	0	9	0.131416	0.611786
2	19	1	0	0	10	0.8138	0.792824
2	19	1	0	0	11	0.774449	0.647031
2	19	1	0	0	12	1.01787	1.00245
2	19	1	0	0	13	1.06921	0.53513
2	19	1	0	0	14	1.61206	1.0032
2	19	1	0	0	15	-0.144892	0.765346
2	19	1	0	0	16	1.15398	1.02853
2	19	1	0	0	17	1.05659	1.31309
2	19	1	0	0	18	0.275983	0.676034
2	19	1	0	0	19	0.960134	0.67764
2	19	1	0	0	20	0.407784	1.09965
2	19	1	0	0	21	0.948734	0.987956
2	19	1	0	0	22	0.762417	1.18745
2	19	1	0	0	23	1.17128	1.2803
2	19	1	0	0	24	1.26679	1.33327
2	19	1	0	0	25	0.970681	1.56008
2	19	1	0	0	26	1.1933	1.46761
2	19	1	0	0	27	0.91655	1.48691
2	19	1	0	0	28	1.13073	1.58775
2	19	1	0	0	29	1.03596	2.10039
2	19	1	0	0	30	2.07899	2.56215
2	19	1	0	1	31	0.980857	1.18911
2	19	1	0	1	32	0.240721	0.971894
2	19	1	0	1	33	0.922234	1.48141
2	19	1	0	1	34	0.607611	1.1468
2	19	1	0	1	35	0.203676	0.834408
2	19	1	0	1	36	1.52644	1.17763
2	19	1	0	1	37	0.0298592	0.553831
2	19	1	0	1	38	0.435812	0.867826
2	19	1	0	1	39	0.897147	0.725033
2	19	1	0	1	40	0.244645	1.16778
2	19	1	0	1	41	-0.314986	0.693801
2	19	1	0	1	42	0.506988	0.374932
2	19	1	0	1	43	-0.171451	0.767671
2	19	1	0	1	44	-0.620768	0.555507
2	19	1	0	1	45	-0.305431	0.218043
2	19	1	0	1	46	-0.475099	0.379777
2	19	1	0	1	47	-1.06449	-0.0616436
2	19	1	0	1	48	-0.319228	0.256943
2	19	1	0	1	49	-0.935403	-0.146091
2	19	1	0	1	50	-0.971287	0.128329
2	19	1	0	1	51	-0.749637	-0.146883
2	19	1	0	1	52	0.355027	0.178289
2	19	1	0	1	53	-0.515491	0.24545
2	19	1	0	1	54	0.0632228	0.07013
2	20	0	0	0	1	0.474048	-0.0845196
2	20	0	0	0	2	-0.178942	-0.0853271
2	20	0	0	0	3	-0.570532	-0.405929
2	20	0	0	0	4	-0.628708	-0.381413
2	20	0	0	0	5	-0.083565	-0.337524
2	20	0	0	0	6	-0.858613	-0.47604
2	20	0	0	0	7	-0.622695	-0.412325
2	20	0	0	0	8	-1.08543	-0.79225
2	20	0	0	0	9	-0.573243	-0.634153
2	20	0	0	0	10	-1.19695	-0.928083
2	20	0	0	0	11	-1.98204	-1.36384
2	20	0	0	0	12	-1.06511	-0.90762
2	20	0	0	0	13	-0.965051	-0.990883
2	20	0	0	0	14	-0.92516	-0.894973
2	20	0	0	0	15	-1.49414	-1.26936
2	20	0	0	0	16	-1.38458	-1.12241
2	20	0	0	0	17	-1.62261	-1.35673
2	20	0	0	0	18	-1.57537	-1.40538
2	20	0	0	0	19	-1.07169	-1.03038
2	20	0	0	0	20	-1.02148	-1.34629
2	20	0	0	0	21	-1.35867	-1.58192
2	20	0	0	0	22	-1.79202	-1.61367
2	20	0	0	0	23	-1.43098	-1.45533
2	20	0	0	0	24	-1.14009	-1.65954
2	20	0	0	0	25	-0.89709	-1.4842
2	20	0	0	0	26	-1.07159	-1.22305
2	20	0	0	0	27	-1.7009	-1.64151
2	20	0	0	0	28	-1.77385	-1.41009
2	20	0	0	0	29	-0.851786	-1.2855
2	20	0	0	0	30	-1.77938	-1.37618
2	20	0	0	1	31	-1.05976	-1.36525
2	20	0	0	1	32	-1.08744	-1.38531
2	20	0	0	1	33	-2.00581	-1.71092
2	20	0	0	1	34	-1.46564	-1.34532
2	20	0	0	1	35	-1.36646	-1.25054
2	20	0	0	1	36	-1.37317	-1.14867
2	20	0	0	1	37	-1.03711	-1.03492
2	20	0	0	1	38	-0.874107	-0.902863
2	20	0	0	1	39	-1.07132	-0.92501
2	20	0	0	1	40	-0.709414	-0.838808
2	20	0	0	1	41	-0.199233	-0.785587
2	20	0	0	1	42	-1.28439	-0.95499
2	20	0	0	1	43	-0.395009	-0.514487
2	20	0	0	1	44	-0.55344	-0.46122
2	20	0	0	1	45	1.01045	-0.40483
2	20	0	0	1	46	-0.923737	-0.559602
2	20	0	0	1	47	0.468232	-0.150986
2	20	0	0	1	48	-0.0920875	-0.386382
2	20	0	0	1	49	0.520172	0.0308232
2	20	0	0	1	50	-0.233378	0.0540514
2	20	0	0	1	51	-0.0449467	0.121993
2	20	0	0	1	52	0.510375	0.0893812
2	20	0	0	1	53	1.09502	0.0661122
2	20	0	0	1	54	0.058659	-0.119161
2	20	1	0	0	1	0.0166929	-0.205693
2	20	1	0	0	2	0.53227	0.0547319
2	20	1	0	0	3	0.738934	0.341961
2	20	1	0	0	4	0.353124	0.255607
2	20	1	0	0	5	1.00963	0.510645
2	20	1	0	0	6	0.368115	0.275882
2	20	1	0	0	7	0.0675188	0.660385
2	20	1	0	0	8	-0.0738241	0.250483
2	20	1	0	0	9	0.227562	0.644777
2	20	1	0	0	10	1.49856	1.11042
2	20	1	0	0	11	-0.0682922	0.63582
2	20	1	0	0	12	-0.223789	0.368912
2	20	1	0	0	13	0.853187	0.83146
2	20	1	0	0	14	0.596546	0.741722
2	20	1	0	0	15	0.0764516	0.947503
2	20	1	0	0	16	0.507733	0.87887
2	20	1	0	0	17	1.08991	0.817268
2	20	1	0	0	18	0.4429	0.636828
2	20	1	0	0	19	1.18126	1.14903
2	20	1	0	0	20	1.0466	1.41285
2	20	1	0	0	21	1.34811	1.14763
2	20	1	0	0	22	0.284879	0.826794
2	20	1	0	0	23	0.291355	0.791579
2	20	1	0	0	24	1.42716	1.42502
2	20	1	0	0	25	1.08822	1.26062
2	20	1	0	0	26	0.713042	0.737632
2	20	1	0	0	27	1.11202	1.30471
2	20	1	0	0	28	1.51633	1.99866
2	20	1	0	0	29	0.592107	1.29977
2	20	1	0	0	30	0.969295	1.73156
2	20	1	0	1	31	0.606096	0.978242
2	20	1	0	1	32	0.390671	0.99331
2	20	1	0	1	33	1.18877	1.35045
2	20	1	0	1	34	1.09275	0.965546
2	20	1	0	1	35	0.954396	1.09661
2	20	1	0	1	36	1.06874	0.990381
2	20	1	0	1	37	0.642634	1.1792
2	20	1	0	1	38	1.38944	1.25652
2	20	1	0	1	39	0.793315	1.01196
2	20	1	0	1	40	0.943336	0.87683
2	20	1	0	1	41	0.118332	0.498004
2	20	1	0	1	42	0.533601	0.608974
2	20	1	0	1	43	0.0998181	0.566521
2	20	1	0	1	44	-0.666618	0.424852
2	20	1	0	1	45	-0.120947	0.426207
2	20	1	0	1	46	0.199327	0.280146
2	20	1	0	1	47	0.323007	0.3416
2	20	1	0	1	48	-0.248774	-0.0663267
2	20	1	0	1	49	-0.233682	0.0434853
2	20	1	0	1	50	-1.16421	-0.199794
2	20	1	0	1	51	-0.0414297	-0.075361
2	20	1	0	1	52	0.289483	0.0236554
2	20	1	0	1	53	0.0468837	-0.00986711
2	20	1	0	1	54	0.0242198	0.0412181
2	21	0	0	0	1	-0.443111	-0.19547
2	21	0	0	0	2	-0.73853	-0.188295
2	21	0	0	0	3	0.492727	-0.166304
2	21	0	0	0	4	-0.378479	-0.272409
2	21	0	0	0	5	-0.405454	-0.387643
2	21	0	0	0	6	-0.563865	-0.403565
2	21	0	0	0	7	-0.548588	-0.426401
2	21	0	0	0	8	0.150875	-0.571485
2	21	0	0	0	9	-0.542473	-0.524883
2	21	0	0	0	10	-0.82452	-0.69901
2	21	0	0	0	11	-1.10374	-0.768638
2	21	0	0	0	12	-1.32263	-0.930557
2	21	0	0	0	13	-0.828907	-0.922015
2	21	0	0	0	14	-1.06358	-0.961644
2	21	0	0	0	15	-1.03896	-0.999022
2	21	0	0	0	16	-1.27944	-0.943512
2	21	0	0	0	17	-1.40467	-1.19532
2	21	0	0	0	18	-1.33775	-1.62615
2	21	0	0	0	19	-1.45748	-1.41964
2	21	0	0	0	20	-1.59658	-1.56125
2	21	0	0	0	21	-1.45217	-1.43614
2	21	0	0	0	22	-1.12894	-1.19782
2	21	0	0	0	23	-1.42512	-1.52529
2	21	0	0	0	24	-1.79066	-1.45914
2	21	0	0	0	25	-0.845823	-1.10223
2	21	0	0	0	26	-1.11959	-1.2789
2	21	0	0	0	27	-1.30373	-1.10079
2	21	0	0	0	28	-0.527037	-1.42662
2	21	0	0	0	29	-0.825488	-1.25513
2	21	0	0	0	30	-0.406128	-1.16667
2	21	0	0	1	31	-1.28695	-1.41593
2	21	0	0	1	32	-1.1802	-1.61846
2	21	0	0	1	33	-1.07385	-1.23514
2	21	0	0	1	34	-0.947878	-1.34522
2	21	0	0	1	35	-0.865963	-1.01559
2	21	0	0	1	36	-0.456888	-0.951277
2	21	0	0	1	37	-0.940441	-1.06607
2	21	0	0	1	38	-1.00062	-1.18169
2	21	0	0	1	39	-0.469458	-0.648321
2	21	0	0	1	40	0.710224	-0.708524
2	21	0	0	1	41	0.263548	-0.318572
2	21	0	0	1	42	0.140667	-0.700546
2	21	0	0	1	43	-0.810528	-0.738196
2	21	0	0	1	44	-0.739544	-0.629866
2	21	0	0	1	45	0.102494	-0.373322
2	21	0	0	1	46	-0.61937	-0.454036
2	21	0	0	1	47	-0.142313	-0.374573
2	21	0	0	1	48	0.718443	-0.388278
2	21	0	0	1	49	1.15639	-0.207008
2	21	0	0	1	50	-0.0908063	-0.141713
2	21	0	0	1	51	0.122056	-0.382154
2	21	0	0	1	52	-0.286535	-0.277696
2	21	0	0	1	53	0.0243006	-0.154726
2	21	0	0	1	54	-0.667704	-0.187108
2	21	1	0	0	1	0.0686463	0.0737544
2	21	1	0	0	2	-0.0478511	0.0115392
2	21	1	0	0	3	0.146982	0.0654207
2	21	1	0	0	4	-0.269819	-0.0953326
2	21	1	0	0	5	0.591802	0.585388
2	21	1	0	0	6	-0.121354	0.134154
2	21	1	0	0	7	-0.309668	0.00813677
2	21	1	0	0	8	0.0154546	0.364751
2	21	1	0	0	9	-0.723357	-0.208124
2	21	1	0	0	10	0.805249	0.190005
2	21	1	0	0	11	0.63162	0.551571
2	21	1	0	0	12	0.253643	0.62951
2	21	1	0	0	13	0.0482606	0.236793
2	21	1	0	0	14	0.179876	0.646467
2	21	1	0	0	15	0.166876	0.495762
2	21	1	0	0	16	-0.403054	0.457042
2	21	1	0	0	17	0.269555	0.617948
2	21	1	0	0	18	0.0761157	0.946218
2	21	1	0	0	19	-0.405339	0.619383
2	21	1	0	0	20	0.926659	0.92098
2	21	1	0	0	21	1.15017	0.905691
2	21	1	0	0	22	0.0502687	1.1209
2	21	1	0	0	23	0.767602	1.15331
2	21	1	0	0	24	0.895558	0.864311
2	21	1	0	0	25	0.936219	0.863529
2	21	1	0	0	26	1.19013	1.3598
2	21	1	0	0	27	0.0636078	0.89737
2	21	1	0	0	28	0.734789	1.07847
2	21	1	0	0	29	0.856849	0.763784
2	21	1	0	0	30	-0.0600572	0.952131
2	21	1	0	1	31	-0.448285	-0.0370179
2	21	1	0	1	32	1.01831	0.848277
2	21	1	0	1	33	0.83205	1.19587
2	21	1	0	1	34	0.47951	0.842137
2	21	1	0	1	35	0.162413	1.02081
2	21	1	0	1	36	0.0635689	0.461584
2	21	1	0	1	37	-0.79497	0.674955
2	21	1	0	1	38	0.659279	1.04897
2	21	1	0	1	39	0.696768	0.715338
2	21	1	0	1	40	1.563	0.950672
2	21	1	0	1	41	0.171191	0.722055
2	21	1	0	1	42	-0.268901	0.310103
2	21	1	0	1	43	0.110822	0.493869
2	21	1	0	1	44	0.910642	0.387573
2	21	1	0	1	45	-0.247035	0.204498
2	21	1	0	1	46	0.343781	0.258618
2	21	1	0	1	47	0.624752	0.0149334
2	21	1	0	1	48	-0.0321972	0.250671
2	21	1	0	1	49	-0.601461	-0.0268913
2	21	1	0	1	50	-0.536923	-0.0652559
2	21	1	0	1	51	0.374626	-0.0469743
2	21	1	0	1	52	-0.583701	-0.395125
2	21	1	0	1	53	-0.747038	-0.232288
2	21	1	0	1	54	-0.215163	-0.0595792
2	22	0	0	0	1	-0.641948	-0.124865
2	22	0	0	0	2	-0.414936	-0.0728913
2	22	0	0	0	3	0.0169915	-0.297197
2	22	0	0	0	4	-0.980211	-0.333372
2	22	0	0	0	5	-0.847333	-0.374874
2	22	0	0	0	6	-0.632042	-0.551007
2	22	0	0	0	7	-0.49882	-0.488314
2	22	0	0	0	8	-0.894981	-0.555733
2	22	0	0	0	9	-1.02721	-0.977078
2	22	0	0	0	10	-0.590621	-0.557001
2	22	0	0	0	11	-0.56886	-0.733052
2	22	0	0	0	12	-1.16539	-1.06695
2	22	0	0	0	13	-1.12547	-1.05645
2	22	0	0	0	14	-1.37287	-1.02918
2	22	0	0	0	15	-0.434438	-0.828852
2	22	0	0	0	16	-0.877963	-1.06849
2	22	0	0	0	17	-1.3561	-1.49018
2	22	0	0	0	18	-0.938082	-1.16303
2	22	0	0	0	19	-1.71891	-1.37972
2	22	0	0	0	20	-1.97141	-1.33808
2	22	0	0	0	21	-1.34042	-1.45073
2	22	0	0	0	22	-0.665306	-1.32575
2	22	0	0	0	23	-1.26722	-1.4036
2	22	0	0	0	24	-1.66262	-1.61134
2	22	0	0	0	25	-1.68265	-1.60259
2	22	0	0	0	26	-1.58017	-1.73229
2	22	0	0	0	27	-1.02146	-1.41752
2	22	0	0	0	28	-0.999379	-1.28049
2	22	0	0	0	29	-1.30559	-1.39994
2	22	0	0	0	30	-1.85022	-1.83662
2	22	0	0	1	31	-1.19728	-1.65863
2	22	0	0	1	32	-1.29487	-1.43423
2	22	0	0	1	33	-1.29513	-1.3693
2	22	0	0	1	34	-1.37285	-1.25609
2	22	0	0	1	35	-1.15448	-0.984032
2	22	0	0	1	36	-1.79949	-1.27449
2	22	0	0	1	37	-1.0851	-0.907523
2	22	0	0	1	38	-1.39847	-0.936911
2	22	0	0	1	39	-0.880992	-0.757631
2	22	0	0	1	40	-0.708054	-0.748215
2	22	0	0	1	41	-0.774942	-0.769297
2	22	0	0	1	42	-0.807428	-0.83678
2	22	0	0	1	43	-0.387868	-0.486952
2	22	0	0	1	44	-0.365873	-0.446358
2	22	0	0	1	45	-0.346359	-0.230843
2	22	0	0	1	46	-0.841492	-0.448249
2	22	0	0	1	47	0.186256	-0.0381426
2	22	0	0	1	48	-0.159181	-0.0983973
2	22	0	0	1	49	-0.409075	-0.0371957
2	22	0	0	1	50	0.382863	0.0296861
2	22	0	0	1	51	-0.271327	-0.0068178
2	22	0	0	1	52	0.622762	0.177046
2	22	0	0	1	53	-0.95919	-0.0994313
2	22	0	0	1	54	0.187221	0.0848719
2	22	1	0	0	1	-0.398763	-0.061872
2	22	1	0	0	2	0.977369	0.102506
2	22	1	0	0	3	-0.195553	0.292725
2	22	1	0	0	4	1.04335	0.572123
2	22	1	0	0	5	0.36399	0.265789
2	22	1	0	0	6	0.702926	0.441424
2	22	1	0	0	7	0.533854	0.501444
2	22	1	0	0	8	0.351155	0.419643
2	22	1	0	0	9	-0.656499	0.323848
2	22	1	0	0	10	-0.64523	0.451642
2	22	1	0	0	11	0.492453	0.672872
2	22	1	0	0	12	-0.35403	0.528784
2	22	1	0	0	13	-0.29165	0.632158
2	22	1	0	0	14	-1.07566	-0.113111
2	22	1	0	0	15	0.974801	0.420929
2	22	1	0	0	16	0.76212	0.635618
2	22	1	0	0	17	0.369983	0.900583
2	22	1	0	0	18	0.686593	0.459236
2	22	1	0	0	19	0.489292	0.57938
2	22	1	0	0	20	1.57354	0.663434
2	22	1	0	0	21	0.789253	0.421844
2	22	1	0	0	22	-0.329737	0.619963
2	22	1	0	0	23	0.952437	1.28012
2	22	1	0	0	24	0.153977	1.10628
2	22	1	0	0	25	0.578788	0.735993
2	22	1	0	0	26	0.281781	0.89079
2	22	1	0	0	27	1.56165	1.01482
2	22	1	0	0	28	-0.51788	0.403957
2	22	1	0	0	29	0.232537	0.910689
2	22	1	0	0	30	0.026435	0.745896
2	22	1	0	1	31	0.629139	0.546003
2	22	1	0	1	32	0.506768	0.961133
2	22	1	0	1	33	1.07646	1.06821
2	22	1	0	1	34	0.771234	0.909751
2	22	1	0	1	35	1.30095	0.687506
2	22	1	0	1	36	0.958035	0.689638
2	22	1	0	1	37	-0.707407	0.642257
2	22	1	0	1	38	0.11588	0.60362
2	22	1	0	1	39	0.784791	0.474806
2	22	1	0	1	40	1.34435	0.744186
2	22	1	0	1	41	0.340938	0.56661
2	22	1	0	1	42	0.651194	0.372603
2	22	1	0	1	43	1.24444	0.566596
2	22	1	0	1	44	1.31117	0.387535
2	22	1	0	1	45	0.313236	0.245314
2	22	1	0	1	46	0.647624	0.39163
2	22	1	0	1	47	1.48796	0.0912262
2	22	1	0	1	48	-0.465487	0.157386
2	22	1	0	1	49	0.49943	0.113346
2	22	1	0	1	50	-0.0207321	-0.0971934
2	22	1	0	1	51	-0.856349	-0.27845
2	22	1	0	1	52	0.188611	-0.0154541
2	22	1	0	1	53	0.284667	-0.170401
2	22	1	0	1	54	-0.665108	-0.0892002
4	34	0	1	0	1	0.338935	0.333254
4	34	0	1	0	2	0.788739	0.202121
4	34	0	1	0	3	-0.204387	-0.161411
4	34	0	1	0	4	-0.800609	-0.424491
4	34	0	1	0	5	-0.580809	-0.230104
4	34	0	1	0	6	-0.403278	-0.487203
4	34	0	1	0	7	-1.09214	-0.778529
4	34	0	1	0	8	0.323291	-0.332427
4	34	0	1	0	9	-0.571589	-0.487237
4	34	0	1	0	10	-0.342571	-0.643764
4	34	0	1	0	11	-1.11997	-0.815608
4	34	0	1	0	12	-0.788091	-0.833842
4	34	0	1	0	13	-0.652977	-0.617814
4	34	0	1	0	14	-1.74074	-1.18669
4	34	0	1	0	15	-0.856996	-0.820297
4	34	0	1	0	16	-1.36531	-1.02029
4	34	0	1	0	17	-1.44077	-0.928199
4	34	0	1	0	18	-1.03278	-0.998392
4	34	0	1	0	19	-0.632346	-1.57566
4	34	0	1	0	20	-1.94636	-1.33659
4	34	0	1	0	21	-1.09104	-1.89163
4	34	0	1	0	22	-0.532454	-1.14377
4	34	0	1	0	23	-0.32268	-1.1638
4	34	0	1	0	24	-0.540458	-1.57521
4	34	0	1	0	25	-0.400687	-1.2373
4	34	0	1	0	26	-0.740085	-1.0405
4	34	0	1	0	27	-1.32208	-1.34682
4	34	0	1	0	28	-1.59282	-1.91535
4	34	0	1	0	29	-0.543942	-1.46246
4	34	0	1	0	30	-0.746629	-1.41015
4	34	0	1	1	31	-0.338184	-1.37404
4	34	0	1	1	32	-0.719942	-0.984451
4	34	0	1	1	33	-2.18411	-1.95363
4	34	0	1	1	34	0.106322	-0.956695
4	34	0	1	1	35	-0.525479	-1.0408
4	34	0	1	1	36	-0.986684	-0.978274
4	34	0	1	1	37	-1.35678	-1.22042
4	34	0	1	1	38	-0.824852	-1.02298
4	34	0	1	1	39	-1.4339	-0.859254
4	34	0	1	1	40	-1.22758	-0.685304
4	34	0	1	1	41	-1.41729	-0.887172
4	34	0	1	1	42	-0.360781	-0.691015
4	34	0	1	1	43	0.270596	-0.628257
4	34	0	1	1	44	0.443621	-0.208238
4	34	0	1	1	45	-0.390318	-0.322178
4	34	0	1	1	46	-0.98969	-0.522861
4	34	0	1	1	47	-0.344356	-0.422501
4	34	0	1	1	48	-0.578113	-0.11048
4	34	0	1	1	49	0.160005	0.0112626
4	34	0	1	1	50	-0.460484	-0.162537
4	34	0	1	1	51	-0.414703	-0.10065
4	34	0	1	1	52	-0.232572	-0.127905
4	34	0	1	1	53	0.947027	-0.00227735
4	34	0	1	1	54	-0.294269	-0.257748
4	34	0	2	0	1	-0.140587	0.0515102
4	34	0	2	0	2	0.262421	-0.160992
4	34	0	2	0	3	-0.211059	-0.240152
4	34	0	2	0	4	0.336334	-0.307518
4	34	0	2	0	5	0.0448628	-0.270257
4	34	0	2	0	6	-1.33879	-0.447975
4	34	0	2	0	7	-1.12999	-0.339632
4	34	0	2	0	8	-1.76648	-0.867056
4	34	0	2	0	9	-0.885743	-0.406223
4	34	0	2	0	10	-1.95146	-0.66702
4	34	0	2	0	11	-1.46051	-0.627537
4	34	0	2	0	12	-1.47646	-0.866575
4	34	0	2	0	13	-2.36251	-0.925805
4	34	0	2	0	14	-1.7039	-0.959036
4	34	0	2	0	15	-2.1826	-1.08608
4	34	0	2	0	16	-1.93077	-1.22871
4	34	0	2	0	17	-1.76001	-1.05791
4	34	0	2	0	18	-3.24348	-1.31924
4	34	0	2	0	19	-2.52288	-1.16036
4	34	0	2	0	20	-2.22198	-1.05541
4	34	0	2	0	21	-2.51693	-1.15368
4	34	0	2	0	22	-2.86043	-1.22459
4	34	0	2	0	23	-2.26913	-1.48472
4	34	0	2	0	24	-2.55164	-1.57941
4	34	0	2	0	25	-2.10373	-1.49035
4	34	0	2	0	26	-2.52749	-1.36651
4	34	0	2	0	27	-2.60701	-1.61488
4	34	0	2	0	28	-2.77164	-1.26059
4	34	0	2	0	29	-2.17678	-1.60048
4	34	0	2	0	30	-2.06515	-1.40091
4	34	0	2	1	31	-3.53238	-1.70599
4	34	0	2	1	32	-2.58056	-1.43273
4	34	0	2	1	33	-2.54536	-1.50397
4	34	0	2	1	34	-2.79327	-1.4758
4	34	0	2	1	35	-2.72698	-1.15266
4	34	0	2	1	36	-1.5196	-1.24027
4	34	0	2	1	37	-1.98496	-0.958391
4	34	0	2	1	38	-1.08384	-0.915782
4	34	0	2	1	39	-0.964047	-1.28541
4	34	0	2	1	40	-0.90173	-1.17682
4	34	0	2	1	41	-1.28106	-0.655585
4	34	0	2	1	42	-0.243054	-0.664873
4	34	0	2	1	43	-1.08485	-0.589278
4	34	0	2	1	44	-0.154109	-0.245657
4	34	0	2	1	45	-0.915726	-0.469855
4	34	0	2	1	46	-0.479339	-0.337542
4	34	0	2	1	47	-0.247421	-0.297477
4	34	0	2	1	48	-0.384926	-0.312201
4	34	0	2	1	49	0.555568	0.158875
4	34	0	2	1	50	-0.0708036	0.211512
4	34	0	2	1	51	-0.654487	0.162412
4	34	0	2	1	52	-0.69418	-0.0669771
4	34	0	2	1	53	-1.03036	-0.0845484
4	34	0	2	1	54	-0.0707766	0.0769162
4	35	0	1	0	1	-0.0990707	-0.0371437
4	35	0	1	0	2	1.51253	-0.151284
4	35	0	1	0	3	0.680359	-0.287794
4	35	0	1	0	4	-0.56764	-0.808993
4	35	0	1	0	5	0.0288828	-0.315237
4	35	0	1	0	6	-0.783514	-0.771185
4	35	0	1	0	7	-0.342224	-0.568688
4	35	0	1	0	8	-0.36046	-0.624945
4	35	0	1	0	9	-0.289957	-0.388535
4	35	0	1	0	10	-0.8815	-0.893719
4	35	0	1	0	11	0.180806	-1.14491
4	35	0	1	0	12	-0.1861	-0.815834
4	35	0	1	0	13	0.445611	-0.068865
4	35	0	1	0	14	2.65843	0.410737
4	35	0	1	0	15	-0.224364	-1.02568
4	35	0	1	0	16	-1.53082	-1.6936
4	35	0	1	0	17	-1.09219	-1.39266
4	35	0	1	0	18	-0.931408	-1.42852
4	35	0	1	0	19	-1.59944	-1.68397
4	35	0	1	0	20	-0.177463	-1.19925
4	35	0	1	0	21	-0.451023	-1.32708
4	35	0	1	0	22	-1.07786	-1.46491
4	35	0	1	0	23	-1.06412	-1.66116
4	35	0	1	0	24	-0.968337	-1.85176
4	35	0	1	0	25	-0.656929	-1.57731
4	35	0	1	0	26	-0.540427	-1.47758
4	35	0	1	0	27	-0.124074	-1.55152
4	35	0	1	0	28	-0.382313	-1.14031
4	35	0	1	0	29	-0.433652	-1.38304
4	35	0	1	0	30	-0.36578	-1.68404
4	35	0	1	1	31	-1.03593	-1.7064
4	35	0	1	1	32	-0.628578	-1.26434
4	35	0	1	1	33	-1.8392	-2.0634
4	35	0	1	1	34	1.06561	-1.38869
4	35	0	1	1	35	0.458607	-1.14521
4	35	0	1	1	36	-0.101643	-1.23732
4	35	0	1	1	37	-0.633395	-0.868961
4	35	0	1	1	38	-0.536322	-0.976807
4	35	0	1	1	39	-1.73947	-1.38293
4	35	0	1	1	40	-1.75308	-1.25719
4	35	0	1	1	41	-0.87053	-1.17031
4	35	0	1	1	42	-0.197509	-1.05339
4	35	0	1	1	43	0.383654	-0.760553
4	35	0	1	1	44	-0.751606	-0.801288
4	35	0	1	1	45	0.861932	-0.805194
4	35	0	1	1	46	0.978969	-0.520877
4	35	0	1	1	47	0.3852	-0.323983
4	35	0	1	1	48	0.0963688	-0.168682
4	35	0	1	1	49	0.752726	-0.0119628
4	35	0	1	1	50	0.972985	-0.216077
4	35	0	1	1	51	0.71535	-0.667701
4	35	0	1	1	52	-0.140329	-0.25985
4	35	0	1	1	53	-0.396245	-0.534695
4	35	0	1	1	54	0.935896	-0.312196
4	35	0	2	0	1	0.00711082	0.138852
4	35	0	2	0	2	0.405418	0.069029
4	35	0	2	0	3	-0.41737	-0.0403498
4	35	0	2	0	4	-0.400117	-0.0350092
4	35	0	2	0	5	-0.325264	-0.185534
4	35	0	2	0	6	0.601315	-0.165342
4	35	0	2	0	7	-0.768483	-0.399182
4	35	0	2	0	8	-0.194814	-0.34339
4	35	0	2	0	9	0.0361734	-0.538942
4	35	0	2	0	10	0.173259	-0.473409
4	35	0	2	0	11	-1.15283	-0.685912
4	35	0	2	0	12	-1.40807	-0.776899
4	35	0	2	0	13	1.54993	-0.875392
4	35	0	2	0	14	-1.06192	-0.977954
4	35	0	2	0	15	-0.736708	-1.0344
4	35	0	2	0	16	-0.38449	-1.61272
4	35	0	2	0	17	-0.313123	-0.764222
4	35	0	2	0	18	-0.518019	-1.20077
4	35	0	2	0	19	-0.886254	-0.913269
4	35	0	2	0	20	-0.183257	-1.00187
4	35	0	2	0	21	-1.08089	-0.958417
4	35	0	2	0	22	-0.762935	-0.925346
4	35	0	2	0	23	-0.564856	-0.824483
4	35	0	2	0	24	-0.206983	-0.907104
4	35	0	2	0	25	0.174415	-0.475682
4	35	0	2	0	26	-1.13649	-1.24748
4	35	0	2	0	27	-0.850775	-1.40112
4	35	0	2	0	28	-1.05588	-1.19906
4	35	0	2	0	29	-0.350234	-1.41841
4	35	0	2	0	30	-0.598929	-0.977604
4	35	0	2	1	31	-1.1866	-1.52973
4	35	0	2	1	32	-0.719628	-0.999125
4	35	0	2	1	33	-0.530331	-0.977246
4	35	0	2	1	34	-0.654679	-0.977727
4	35	0	2	1	35	-0.610007	-0.915465
4	35	0	2	1	36	-0.370324	-1.66841
4	35	0	2	1	37	-0.327836	-0.951189
4	35	0	2	1	38	-0.200092	-0.759508
4	35	0	2	1	39	-2.23949	-1.65962
4	35	0	2	1	40	-0.586663	-0.785759
4	35	0	2	1	41	-0.696328	-0.815101
4	35	0	2	1	42	0.199035	-0.586013
4	35	0	2	1	43	-0.837612	-0.405391
4	35	0	2	1	44	0.359266	-0.339442
4	35	0	2	1	45	-0.114359	-0.325441
4	35	0	2	1	46	0.797238	-0.101535
4	35	0	2	1	47	-0.66092	-0.588886
4	35	0	2	1	48	-0.599495	-0.1136
4	35	0	2	1	49	-0.445851	-0.236143
4	35	0	2	1	50	0.0621143	0.000292722
4	35	0	2	1	51	-0.223307	-0.127801
4	35	0	2	1	52	-1.22708	-0.231888
4	35	0	2	1	53	0.804697	0.282593
4	35	0	2	1	54	0.0130221	0.155829
4	36	0	1	0	1	-0.370459	0.173237
4	36	0	1	0	2	0.219316	-0.129513
4	36	0	1	0	3	-0.446181	-0.328135
4	36	0	1	0	4	-0.422172	-0.168408
4	36	0	1	0	5	0.309256	-0.25819
4	36	0	1	0	6	-0.646237	-0.585275
4	36	0	1	0	7	-1.78076	-0.722654
4	36	0	1	0	8	-0.548555	-0.448825
4	36	0	1	0	9	-0.478089	-0.396338
4	36	0	1	0	10	-0.988475	-1.04797
4	36	0	1	0	11	-0.208943	-1.11612
4	36	0	1	0	12	-0.70785	-0.878555
4	36	0	1	0	13	-1.98228	-1.31004
4	36	0	1	0	14	-1.14905	-0.819257
4	36	0	1	0	15	-0.0998865	-1.135
4	36	0	1	0	16	-1.13432	-1.21373
4	36	0	1	0	17	-0.735952	-1.22865
4	36	0	1	0	18	-0.0323105	-0.873775
4	36	0	1	0	19	0.14193	-1.34394
4	36	0	1	0	20	-2.08769	-1.93275
4	36	0	1	0	21	-0.98644	-1.87247
4	36	0	1	0	22	-0.722431	-1.60614
4	36	0	1	0	23	-0.511687	-1.16951
4	36	0	1	0	24	-1.00467	-1.32174
4	36	0	1	0	25	-1.73379	-1.55504
4	36	0	1	0	26	-0.72011	-1.31399
4	36	0	1	0	27	-0.00170021	-1.40651
4	36	0	1	0	28	0.345859	-1.37464
4	36	0	1	0	29	-0.828646	-1.7455
4	36	0	1	0	30	-1.10754	-2.04047
4	36	0	1	1	31	-0.621367	-1.84806
4	36	0	1	1	32	-0.909126	-1.88602
4	36	0	1	1	33	-1.5017	-1.37553
4	36	0	1	1	34	-1.14244	-0.986096
4	36	0	1	1	35	-0.838841	-1.23075
4	36	0	1	1	36	-2.6725	-1.82642
4	36	0	1	1	37	-1.01822	-1.28366
4	36	0	1	1	38	-0.442282	-1.04982
4	36	0	1	1	39	0.554122	-1.25109
4	36	0	1	1	40	0.0310664	-0.741687
4	36	0	1	1	41	-0.637912	-0.829151
4	36	0	1	1	42	-0.01077	-0.889622
4	36	0	1	1	43	-0.00496133	-0.8993
4	36	0	1	1	44	-0.723767	-0.387043
4	36	0	1	1	45	-0.486784	-0.395448
4	36	0	1	1	46	-0.696617	-0.656973
4	36	0	1	1	47	0.163054	-0.35075
4	36	0	1	1	48	-1.24455	-0.408245
4	36	0	1	1	49	-0.582773	-0.176849
4	36	0	1	1	50	-1.22552	-0.27094
4	36	0	1	1	51	-0.726779	0.117185
4	36	0	1	1	52	-1.07405	-0.270342
4	36	0	1	1	53	-0.530842	-0.379002
4	36	0	1	1	54	-0.442143	-0.172552
4	36	0	2	0	1	0.247266	0.0651224
4	36	0	2	0	2	0.176996	0.263166
4	36	0	2	0	3	-0.0391686	0.1215
4	36	0	2	0	4	-1.19998	-0.108093
4	36	0	2	0	5	-0.947832	-0.15807
4	36	0	2	0	6	0.289002	0.0142434
4	36	0	2	0	7	-0.857805	-0.473801
4	36	0	2	0	8	-0.782694	-0.413523
4	36	0	2	0	9	-0.246534	0.0419528
4	36	0	2	0	10	0.149088	-0.360577
4	36	0	2	0	11	-0.783087	-0.556443
4	36	0	2	0	12	-0.483389	-0.791833
4	36	0	2	0	13	0.512917	-0.888934
4	36	0	2	0	14	-0.46391	-1.05843
4	36	0	2	0	15	-0.725704	-0.901921
4	36	0	2	0	16	0.581198	-0.969475
4	36	0	2	0	17	-0.924684	-0.992923
4	36	0	2	0	18	0.301552	-1.08604
4	36	0	2	0	19	-0.58714	-1.45383
4	36	0	2	0	20	-1.61117	-1.41729
4	36	0	2	0	21	-1.52772	-1.39524
4	36	0	2	0	22	-2.22169	-1.75731
4	36	0	2	0	23	-0.215428	-1.41688
4	36	0	2	0	24	-1.3579	-1.47407
4	36	0	2	0	25	-1.31828	-1.20686
4	36	0	2	0	26	-0.331404	-1.24733
4	36	0	2	0	27	0.518204	-1.47935
4	36	0	2	0	28	-0.916563	-1.21183
4	36	0	2	0	29	-0.633501	-1.09777
4	36	0	2	0	30	-0.572168	-1.25208
4	36	0	2	1	31	0.137554	-1.21185
4	36	0	2	1	32	-1.51773	-1.43865
4	36	0	2	1	33	-1.01117	-1.25452
4	36	0	2	1	34	-0.0723856	-1.10293
4	36	0	2	1	35	-0.420054	-1.09632
4	36	0	2	1	36	-0.410741	-1.18234
4	36	0	2	1	37	-0.139717	-0.638263
4	36	0	2	1	38	-0.374149	-0.82954
4	36	0	2	1	39	0.276145	-0.580416
4	36	0	2	1	40	-0.214243	-0.600297
4	36	0	2	1	41	-1.47572	-0.708892
4	36	0	2	1	42	0.20991	-0.333764
4	36	0	2	1	43	-1.11068	-0.653256
4	36	0	2	1	44	-0.598546	-0.547353
4	36	0	2	1	45	-0.233985	-0.446281
4	36	0	2	1	46	0.126983	-0.401363
4	36	0	2	1	47	-0.173363	-0.350891
4	36	0	2	1	48	-0.163315	-0.368583
4	36	0	2	1	49	0.333626	0.230384
4	36	0	2	1	50	0.205266	-0.0978659
4	36	0	2	1	51	0.127543	0.185515
4	36	0	2	1	52	0.469177	0.151747
4	36	0	2	1	53	0.514646	0.624513
4	36	0	2	1	54	-0.0334402	0.423619
4	37	0	1	0	1	0.793086	-0.0347864
4	37	0	1	0	2	0.267137	0.0984105
4	37	0	1	0	3	-0.218738	-0.311469
4	37	0	1	0	4	-0.274444	-0.249778
4	37	0	1	0	5	-0.127985	-0.300075
4	37	0	1	0	6	-0.115974	-0.256895
4	37	0	1	0	7	-0.139584	-0.602718
4	37	0	1	0	8	-0.284673	-0.601648
4	37	0	1	0	9	-0.013389	-0.507837
4	37	0	1	0	10	-0.34647	-0.777393
4	37	0	1	0	11	0.000339385	-0.816536
4	37	0	1	0	12	-0.0940509	-0.778141
4	37	0	1	0	13	-1.38706	-1.05838
4	37	0	1	0	14	-0.00049277	-1.16575
4	37	0	1	0	15	0.0932192	-0.98448
4	37	0	1	0	16	0.296999	-0.983341
4	37	0	1	0	17	-0.0577469	-2.13806
4	37	0	1	0	18	-0.968379	-1.03495
4	37	0	1	0	19	-0.919522	-1.38195
4	37	0	1	0	20	-0.637606	-1.23398
4	37	0	1	0	21	-0.115558	-1.49418
4	37	0	1	0	22	-0.0507651	-1.75445
4	37	0	1	0	23	-0.997317	-1.28947
4	37	0	1	0	24	-0.455227	-1.72799
4	37	0	1	0	25	-0.293208	-1.23341
4	37	0	1	0	26	-0.351557	-1.46948
4	37	0	1	0	27	-0.330285	-1.48707
4	37	0	1	0	28	-0.469382	-1.29725
4	37	0	1	0	29	-1.19745	-1.82401
4	37	0	1	0	30	-0.341045	-1.12944
4	37	0	1	1	31	0.287246	-1.55467
4	37	0	1	1	32	-0.635512	-1.79358
4	37	0	1	1	33	-0.155788	-1.06241
4	37	0	1	1	34	-0.605438	-2.22648
4	37	0	1	1	35	-1.21723	-1.26164
4	37	0	1	1	36	-0.603458	-0.93515
4	37	0	1	1	37	-0.976003	-1.16499
4	37	0	1	1	38	-1.13235	-1.91108
4	37	0	1	1	39	-0.88221	-1.20414
4	37	0	1	1	40	0.0532824	-0.829499
4	37	0	1	1	41	-0.549673	-0.804607
4	37	0	1	1	42	-0.0883491	-0.74596
4	37	0	1	1	43	0.309297	-0.610886
4	37	0	1	1	44	-0.373725	-0.589923
4	37	0	1	1	45	-0.380556	-1.13254
4	37	0	1	1	46	-0.731211	-0.770486
4	37	0	1	1	47	-0.337906	-0.284525
4	37	0	1	1	48	-0.0321508	-0.418423
4	37	0	1	1	49	0.725332	-0.00371224
4	37	0	1	1	50	-0.402152	-0.284474
4	37	0	1	1	51	0.455258	-0.0729687
4	37	0	1	1	52	0.77361	0.033861
4	37	0	1	1	53	0.726717	-0.243458
4	37	0	1	1	54	-0.399135	-0.125404
4	37	0	2	0	1	0.67376	0.102987
[truncated: 1,457 more rows]
