# Supplementary material for: Postural control of arm and fingers through integration of movement commands
Source: eLife. 2020 Feb 11;9:e52507. doi: 10.7554/eLife.52507 (PMC7062460; doi:10.7554/eLife.52507)
Supplement: Figure 4—source data 1. — The data are divided into two tabs, ‘data-panel-A’ and ‘data-panel-B’. The former contains the data for Figure 4A and the latter contains the data for Figure 4B. Data are provided for all channel trials during Phase 1 and Phase 2 of adaptation as shown in Figure 4. The ‘readme’ tab describes all quantities reported in the two tabs containing participant data. [file elife-52507-fig4-data1.xlsx]

## Sheet: readme
Lead author	Scott	Albert
Title	Postural control of arm and fingers through integration of movement commands
Publication year	2020
Journal	eLife
Description	These data are reported in Figure 4 of the manuscript.
Column description (panel A)	Experiment number	This is an ID that refers to different types of experiments
	Subject ID	This is an ID number assigned to each participant.
	Period	Refers to the phase of the experiment (0 is Phase 1 of Figure 4A, 1 is Phase 2 of Figure 4A)
	Trial number	This is the channel trial number on which the data were recorded
	Hold 2 - Hold 1 (force)	This is the difference in force measured during holding (hold 2 - hold 1) in Newtons
	Move force integral	This is the integral of force during movement, relative to hold 1 force (units are N-s)
Column description (panel B)	Experiment number	This is an ID that refers to different types of experiments
	Subject ID	This is an ID number assigned to each participant.
	Period	Refers to the phase of the experiment (0 is Phase 1 of Figure 4B, 1 is Phase 2 of Figure 4B)
	Trial number	This is the channel trial number on which the data were recorded
	Hold 2 - Hold 1 (force)	This is the difference in force measured during holding (hold 2 - hold 1) in Newtons
	Move force integral	This is the integral of force during movement, relative to hold 1 force (units are N-s)

## Sheet: data-panel-A
Experiment number	Subject ID	Period	Trial number	Hold 2 - Hold 1 (force)	Move force integral
8	94	0	1	-0.113126	-0.128842
8	94	0	2	-0.104242	0.0159626
8	94	0	3	0.120309	0.0020009
8	94	0	4	0.174863	-0.00375899
8	94	0	5	0.219534	0.521869
8	94	0	6	0.0928742	0.167818
8	94	0	7	0.380646	0.542972
8	94	0	8	-0.407263	-0.136048
8	94	0	9	0.150955	0.148487
8	94	0	10	0.257429	0.210856
8	94	0	11	0.128277	0.290808
8	94	0	12	0.0632371	-0.0743284
8	94	0	13	0.326935	0.564479
8	94	0	14	0.301572	0.244871
8	94	0	15	0.456414	0.349987
8	94	0	16	0.362288	0.853152
8	94	0	17	-0.154199	0.150418
8	94	0	18	0.104911	0.45075
8	94	0	19	0.151101	0.4656
8	94	0	20	0.275395	0.311097
8	94	0	21	-0.269296	0.277547
8	94	0	22	0.10859	0.569765
8	94	1	23	0.0468077	0.792036
8	94	1	24	0.100365	0.367425
8	94	1	25	0.173542	0.321957
8	94	1	26	0.0306235	0.607316
8	94	1	27	0.464304	0.730726
8	94	1	28	0.744717	0.512917
8	94	1	29	0.190206	0.334991
8	94	1	30	0.281514	0.687039
8	94	1	31	0.428605	0.701518
8	94	1	32	0.630986	0.303791
8	94	1	33	0.416063	0.48371
8	94	1	34	0.386024	1.24962
8	94	1	35	0.379874	0.997577
8	94	1	36	0.331814	0.514366
8	94	1	37	0.397043	0.9206
8	94	1	38	0.672683	0.779759
8	94	1	39	0.390362	0.540818
8	94	1	40	-0.0297597	0.473826
8	94	1	41	0.326896	0.888029
8	94	1	42	0.616635	0.862216
8	94	1	43	0.187308	0.64072
8	94	1	44	0.274054	0.772589
8	94	1	45	0.486368	0.804689
8	94	1	46	0.313249	0.934793
8	94	1	47	0.333115	0.633718
8	94	1	48	0.760837	0.733376
8	94	1	49	0.461088	0.615426
8	94	1	50	0.530533	1.09151
8	94	1	51	0.526721	0.572962
8	94	1	52	0.213968	0.729567
8	94	1	53	0.618994	1.31498
8	94	1	54	-0.685869	0.0232082
8	94	1	55	0.448362	0.28744
8	94	1	56	0.499635	0.849264
8	94	1	57	0.259752	0.722938
8	94	1	58	0.233764	0.0543055
8	94	1	59	0.987299	0.775465
8	94	1	60	0.614349	0.862067
8	94	1	61	0.260448	0.435143
8	94	1	62	0.288005	0.851967
8	95	0	1	0.0132693	0.0691982
8	95	0	2	0.190699	-0.184326
8	95	0	3	0.188726	-0.0652808
8	95	0	4	0.638081	0.318681
8	95	0	5	0.294821	0.418925
8	95	0	6	0.267585	0.172182
8	95	0	7	0.258179	0.218988
8	95	0	8	0.264625	0.27252
8	95	0	9	0.691991	0.303155
8	95	0	10	0.221743	0.110505
8	95	0	11	0.450879	0.185661
8	95	0	12	0.576073	0.725832
8	95	0	13	2.04421	1.80703
8	95	0	14	0.338355	0.299733
8	95	0	15	0.936301	0.45896
8	95	0	16	0.739851	0.536241
8	95	0	17	1.14713	0.319795
8	95	0	18	0.902369	0.166391
8	95	0	19	0.900268	0.493494
8	95	0	20	0.0341238	1.07206
8	95	0	21	0.581022	1.16715
8	95	0	22	0.995823	0.335003
8	95	1	23	1.3306	0.472386
8	95	1	24	0.946888	0.773832
8	95	1	25	0.569072	0.423906
8	95	1	26	0.300883	-0.196689
8	95	1	27	1.22851	0.825697
8	95	1	28	1.11618	0.698166
8	95	1	29	1.2019	0.336894
8	95	1	30	0.893309	0.630467
8	95	1	31	1.16653	0.966167
8	95	1	32	0.752021	0.432261
8	95	1	33	1.4346	0.375365
8	95	1	34	1.24241	0.271069
8	95	1	35	0.748379	0.817889
8	95	1	36	0.914703	0.898913
8	95	1	37	1.39052	0.773695
8	95	1	38	1.02092	0.703852
8	95	1	39	1.02492	0.925885
8	95	1	40	0.456708	0.474105
8	95	1	41	1.47195	0.544692
8	95	1	42	1.37061	0.999762
8	95	1	43	1.39306	0.624418
8	95	1	44	1.107	1.19729
8	95	1	45	1.4689	0.998723
8	95	1	46	1.20976	0.493569
8	95	1	47	1.57694	0.483722
8	95	1	48	1.42193	0.739807
8	95	1	49	1.64178	0.947863
8	95	1	50	1.81413	0.779157
8	95	1	51	1.36852	0.739638
8	95	1	52	1.23705	0.798747
8	95	1	53	1.23334	0.691002
8	95	1	54	2.18152	0.533866
8	95	1	55	1.99617	0.803758
8	95	1	56	2.07678	0.713845
8	95	1	57	1.48741	1.21744
8	95	1	58	1.69208	0.966907
8	95	1	59	1.5814	0.659547
8	95	1	60	1.46386	0.568334
8	95	1	61	1.45257	1.01487
8	95	1	62	1.07829	0.95909
8	96	0	1	-0.0979746	-0.0709269
8	96	0	2	0.00779022	0.313582
8	96	0	3	0.0898542	0.052228
8	96	0	4	-0.0130951	0.3766
8	96	0	5	0.0303103	0.209896
8	96	0	6	-0.00151251	0.279745
8	96	0	7	0.216645	0.334221
8	96	0	8	0.0807853	0.285119
8	96	0	9	0.292155	0.567784
8	96	0	10	0.245505	0.526479
8	96	0	11	0.139858	0.651289
8	96	0	12	0.346735	0.384028
8	96	0	13	0.41033	0.820142
8	96	0	14	0.466142	0.583273
8	96	0	15	0.365489	0.531491
8	96	0	16	0.0688884	0.637235
8	96	0	17	0.132347	0.755435
8	96	0	18	0.0504891	0.822263
8	96	0	19	0.0621054	0.337426
8	96	0	20	0.237277	0.780875
8	96	0	21	0.177716	0.530499
8	96	0	22	0.0941516	0.645574
8	96	1	23	0.220182	0.901987
8	96	1	24	0.148399	1.09033
8	96	1	25	0.437219	0.901934
8	96	1	26	-0.0320545	0.685818
8	96	1	27	0.2411	0.858885
8	96	1	28	0.0452535	0.486084
8	96	1	29	0.0730029	0.525138
8	96	1	30	0.049586	0.666873
8	96	1	31	0.106567	0.784917
8	96	1	32	-0.115867	0.855147
8	96	1	33	-0.0816315	0.596714
8	96	1	34	0.138217	0.729205
8	96	1	35	0.547496	0.766067
8	96	1	36	0.116981	0.800331
8	96	1	37	0.401956	1.13986
8	96	1	38	0.178891	0.847497
8	96	1	39	-0.00234021	0.729592
8	96	1	40	0.0332547	1.00095
8	96	1	41	0.639144	0.663982
8	96	1	42	0.519666	0.922836
8	96	1	43	0.34953	0.630574
8	96	1	44	0.0211409	0.718711
8	96	1	45	0.217517	0.393354
8	96	1	46	0.0027943	0.657768
8	96	1	47	0.389518	0.856242
8	96	1	48	0.229986	0.94078
8	96	1	49	0.545625	0.812634
8	96	1	50	-0.0362205	0.696278
8	96	1	51	0.401052	0.9552
8	96	1	52	0.221751	0.771082
8	96	1	53	0.169045	1.02529
8	96	1	54	0.503211	1.03675
8	96	1	55	0.372876	0.529606
8	96	1	56	0.101957	0.767755
8	96	1	57	0.47859	1.20745
8	96	1	58	0.0888298	0.697005
8	96	1	59	0.107108	0.793876
8	96	1	60	0.892119	0.980367
8	96	1	61	0.0124229	0.442212
8	96	1	62	0.610098	0.91701
8	97	0	1	0.164069	0.0479335
8	97	0	2	0.165285	0.344471
8	97	0	3	0.447521	0.313534
8	97	0	4	0.406021	0.305329
8	97	0	5	0.361557	0.297294
8	97	0	6	0.294346	0.271254
8	97	0	7	0.455064	0.167673
8	97	0	8	0.631393	0.732843
8	97	0	9	0.27892	0.0186992
8	97	0	10	0.30823	0.611216
8	97	0	11	0.171692	0.666694
8	97	0	12	0.484819	0.595707
8	97	0	13	0.415154	0.690432
8	97	0	14	0.731289	0.784565
8	97	0	15	0.622568	0.864761
8	97	0	16	0.437328	0.597535
8	97	0	17	0.427694	0.716965
8	97	0	18	0.0425716	0.479598
8	97	0	19	0.430731	0.798033
8	97	0	20	0.354698	0.748834
8	97	0	21	0.468035	0.899932
8	97	0	22	0.232339	0.765875
8	97	1	23	0.345895	1.01614
8	97	1	24	0.752409	0.866896
8	97	1	25	0.415583	0.821235
8	97	1	26	0.320299	0.564977
8	97	1	27	1.19183	1.30128
8	97	1	28	0.548915	1.18754
8	97	1	29	0.828967	0.840908
8	97	1	30	1.00375	1.06859
8	97	1	31	0.879741	0.779817
8	97	1	32	0.346669	0.852984
8	97	1	33	0.9593	1.18797
8	97	1	34	0.154678	0.924413
8	97	1	35	0.765845	1.32476
8	97	1	36	0.635249	0.951196
8	97	1	37	0.37567	0.818831
8	97	1	38	1.05121	1.04205
8	97	1	39	0.662502	0.771436
8	97	1	40	0.417444	0.852273
8	97	1	41	0.683997	1.06667
8	97	1	42	1.16915	0.968597
8	97	1	43	0.739685	1.06752
8	97	1	44	1.07621	1.44582
8	97	1	45	0.500134	1.21997
8	97	1	46	0.844596	0.753163
8	97	1	47	0.823104	1.51666
8	97	1	48	1.47239	1.64578
8	97	1	49	0.97398	1.02422
8	97	1	50	1.32754	1.5103
8	97	1	51	0.440888	1.25045
8	97	1	52	0.882732	1.24742
8	97	1	53	0.484455	0.841064
8	97	1	54	0.691266	0.95832
8	97	1	55	0.78635	0.933488
8	97	1	56	1.06685	1.46178
8	97	1	57	0.470499	0.751152
8	97	1	58	0.45145	1.00689
8	97	1	59	0.641707	0.932607
8	97	1	60	0.542549	1.1476
8	97	1	61	0.806185	1.40585
8	97	1	62	0.439003	0.996222
8	98	0	1	-0.212396	0.0951666
8	98	0	2	-0.764176	-0.622863
8	98	0	3	-0.128612	-0.078566
8	98	0	4	-0.109501	-0.0121002
8	98	0	5	0.00314427	0.333378
8	98	0	6	0.0193835	0.316324
8	98	0	7	-0.148506	0.228096
8	98	0	8	0.0170592	0.935758
8	98	0	9	-0.0944287	0.0983209
8	98	0	10	0.220281	0.735609
8	98	0	11	0.171614	0.326021
8	98	0	12	-0.20939	0.385352
8	98	0	13	-0.025543	0.533834
8	98	0	14	0.269293	0.504766
8	98	0	15	-0.339498	0.135435
8	98	0	16	0.224968	0.882792
8	98	0	17	0.235875	1.18438
8	98	0	18	0.123148	0.822857
8	98	0	19	0.401655	0.934453
8	98	0	20	0.143333	0.976502
8	98	0	21	0.0691183	0.489938
8	98	0	22	-0.00357405	0.906528
8	98	1	23	0.612373	1.35575
8	98	1	24	0.166672	0.79853
8	98	1	25	0.197567	0.468504
8	98	1	26	0.177851	0.740186
8	98	1	27	0.39922	1.15549
8	98	1	28	0.170857	1.26586
8	98	1	29	0.363969	1.13973
8	98	1	30	-0.179262	-0.105552
8	98	1	31	0.263462	0.711817
8	98	1	32	0.175841	0.35547
8	98	1	33	0.135995	1.06662
8	98	1	34	0.150903	0.869188
8	98	1	35	-0.0652017	0.135779
8	98	1	36	-0.164873	1.21297
8	98	1	37	1.44325	2.03106
8	98	1	38	-0.347882	0.566946
8	98	1	39	-0.0826442	0.733174
8	98	1	40	-0.0110923	0.825291
8	98	1	41	0.0131611	0.553736
8	98	1	42	0.0597303	0.755948
8	98	1	43	-0.019426	0.529627
8	98	1	44	0.036148	0.381659
8	98	1	45	0.0307713	0.420531
8	98	1	46	0.501261	1.37064
8	98	1	47	0.103694	1.22414
8	98	1	48	-0.0684557	0.628755
8	98	1	49	-0.109648	0.767279
8	98	1	50	-0.0576513	0.479376
8	98	1	51	-0.0725621	0.4372
8	98	1	52	0.0050603	0.732826
8	98	1	53	0.368279	1.37173
8	98	1	54	-0.103216	0.780103
8	98	1	55	-0.136546	1.00263
8	98	1	56	0.0495098	0.428082
8	98	1	57	0.0627954	1.03322
8	98	1	58	-0.0968372	0.710721
8	98	1	59	0.399333	0.690527
8	98	1	60	0.194208	1.19869
8	98	1	61	-0.0461986	0.0402276
8	98	1	62	0.267761	1.18942
8	99	0	1	-0.240693	-0.102945
8	99	0	2	0.108365	-0.0240692
8	99	0	3	-0.0924805	-0.229695
8	99	0	4	0.271834	0.426389
8	99	0	5	-0.0211414	-0.145883
8	99	0	6	-0.0876835	-0.0299456
8	99	0	7	0.52368	0.797593
8	99	0	8	-0.209498	0.244801
8	99	0	9	0.00905702	-0.0526209
8	99	0	10	0.313615	0.504259
8	99	0	11	0.240156	0.440553
8	99	0	12	0.310236	0.517898
8	99	0	13	-0.0223438	0.159166
8	99	0	14	0.315459	0.334146
8	99	0	15	0.275341	0.389235
8	99	0	16	0.155128	0.585323
8	99	0	17	0.319395	0.470008
8	99	0	18	0.657774	0.790453
8	99	0	19	0.300161	0.733758
8	99	0	20	-0.140085	0.179425
8	99	0	21	0.0811239	0.403544
8	99	0	22	0.0541441	1.25706
8	99	1	23	0.748135	0.616996
8	99	1	24	0.0922007	0.473018
8	99	1	25	0.550815	0.616871
8	99	1	26	0.631654	0.574455
8	99	1	27	-0.0508555	0.345508
8	99	1	28	0.0981559	0.744339
8	99	1	29	0.129382	0.493576
8	99	1	30	0.441955	0.667175
8	99	1	31	0.488319	0.736337
8	99	1	32	0.173178	0.811578
8	99	1	33	0.162695	0.198474
8	99	1	34	0.0509164	0.357758
8	99	1	35	0.349258	1.05633
8	99	1	36	0.93901	1.13388
8	99	1	37	0.74398	1.50849
8	99	1	38	0.349015	1.02147
8	99	1	39	0.171486	0.383228
8	99	1	40	0.688144	1.24758
8	99	1	41	0.39614	0.516746
8	99	1	42	0.699434	0.947273
8	99	1	43	0.556091	1.06262
8	99	1	44	-0.04394	0.34091
8	99	1	45	0.709123	1.19488
8	99	1	46	1.27556	0.750644
8	99	1	47	0.209464	0.383872
8	99	1	48	0.397255	0.993915
8	99	1	49	0.341652	0.572054
8	99	1	50	0.315864	1.18464
8	99	1	51	0.504872	0.797636
8	99	1	52	0.285562	0.74555
8	99	1	53	0.116101	0.936918
8	99	1	54	0.354171	1.12347
8	99	1	55	-0.000137648	0.879935
8	99	1	56	-7.73303e-05	0.334518
8	99	1	57	0.0271956	0.973656
8	99	1	58	1.08108	1.17275
8	99	1	59	0.451883	0.858054
8	99	1	60	0.204166	0.915172
8	99	1	61	0.573047	1.16886
8	99	1	62	0.483849	1.20575
8	100	0	1	-0.0662433	-0.0993974
8	100	0	2	-0.00865642	0.0806478
8	100	0	3	0.149561	-0.0262335
8	100	0	4	0.133359	-0.0633727
8	100	0	5	0.0962734	0.137661
8	100	0	6	0.290607	0.283745
8	100	0	7	0.391028	0.470454
8	100	0	8	0.357305	-0.328142
8	100	0	9	0.140326	0.210066
8	100	0	10	0.483949	0.553885
8	100	0	11	0.402626	0.237679
8	100	0	12	0.564651	0.60894
8	100	0	13	0.407765	-0.0205832
8	100	0	14	0.338252	0.460595
8	100	0	15	0.631809	0.464125
8	100	0	16	0.333715	0.382914
8	100	0	17	0.554394	0.557675
8	100	0	18	0.27981	0.425094
8	100	0	19	0.322036	0.613608
8	100	0	20	0.593	0.765136
8	100	0	21	0.778432	0.934026
8	100	0	22	0.458595	0.853159
8	100	1	23	0.637673	0.668315
8	100	1	24	0.323264	0.46228
8	100	1	25	0.38584	0.461427
8	100	1	26	0.571214	0.674657
8	100	1	27	1.26133	1.19372
8	100	1	28	0.490531	0.900372
8	100	1	29	0.701333	0.901181
8	100	1	30	0.647828	0.830039
8	100	1	31	0.397304	0.803192
8	100	1	32	0.567355	0.459268
8	100	1	33	0.529887	0.779736
8	100	1	34	0.319158	0.652749
8	100	1	35	0.342443	0.61137
8	100	1	36	0.384744	0.630282
8	100	1	37	0.548308	0.72886
8	100	1	38	0.157802	0.369427
8	100	1	39	0.444366	0.62408
8	100	1	40	0.275681	0.28173
8	100	1	41	0.927704	0.911507
8	100	1	42	0.768111	0.803732
8	100	1	43	0.450961	0.739199
8	100	1	44	0.711595	1.01053
8	100	1	45	0.673034	0.767459
8	100	1	46	0.208914	0.519038
8	100	1	47	0.446726	0.576617
8	100	1	48	0.265198	0.563557
8	100	1	49	0.510082	1.01744
8	100	1	50	0.347976	0.81118
8	100	1	51	0.598094	0.739345
8	100	1	52	0.334547	0.545372
8	100	1	53	0.467938	0.664627
8	100	1	54	0.230755	0.717042
8	100	1	55	0.332011	0.447614
8	100	1	56	0.495974	0.565218
8	100	1	57	0.371957	0.731681
8	100	1	58	0.555882	0.672195
8	100	1	59	0.180021	0.504971
8	100	1	60	0.665499	0.343996
8	100	1	61	0.566796	0.617557
8	100	1	62	0.518834	0.639066
8	101	0	1	-0.619296	-0.445338
8	101	0	2	-0.411588	-0.251089
8	101	0	3	-0.373986	0.155736
8	101	0	4	-0.410692	-0.21963
8	101	0	5	-0.169698	-0.0339708
8	101	0	6	-0.103491	0.0174951
8	101	0	7	-0.00758273	0.147867
8	101	0	8	0.54106	0.584753
8	101	0	9	-0.071221	0.0304829
8	101	0	10	-0.202702	0.135817
8	101	0	11	-0.128568	0.0217102
8	101	0	12	-0.0221016	0.349557
8	101	0	13	-0.0673386	0.230237
8	101	0	14	0.284773	0.651598
8	101	0	15	-0.103638	0.0766037
8	101	0	16	-0.235872	0.214348
8	101	0	17	0.147741	0.527165
8	101	0	18	-0.451118	0.105589
8	101	0	19	-0.0670712	0.504315
8	101	0	20	-0.229348	0.249191
8	101	0	21	0.130906	0.609628
8	101	0	22	-0.145843	0.589597
8	101	1	23	-0.140639	0.379377
8	101	1	24	0.0109983	0.382561
8	101	1	25	-0.186723	0.23107
8	101	1	26	0.000148785	0.568438
8	101	1	27	0.270145	0.532923
8	101	1	28	-0.145013	0.270916
8	101	1	29	-0.345582	-0.0527899
8	101	1	30	-0.125577	0.465755
8	101	1	31	-0.262314	0.347678
8	101	1	32	0.146522	0.0961734
8	101	1	33	0.0463625	0.378794
8	101	1	34	-0.0865418	0.742039
8	101	1	35	0.18081	0.807506
8	101	1	36	-0.146442	0.449093
8	101	1	37	-0.156736	0.410971
8	101	1	38	-0.156728	0.195592
8	101	1	39	NaN	-0.651941
8	101	1	40	-0.0484726	0.734731
8	101	1	41	-0.254016	0.150356
8	101	1	42	-0.343207	0.42956
8	101	1	43	-0.323103	0.334946
8	101	1	44	-0.203771	0.280842
8	101	1	45	-0.62439	-0.258963
8	101	1	46	-0.371888	0.373078
8	101	1	47	-0.207427	0.467081
8	101	1	48	-0.156411	0.217117
8	101	1	49	0.130749	0.994315
8	101	1	50	-0.20002	0.465093
8	101	1	51	-0.215929	0.333829
8	101	1	52	0.00936686	0.585633
8	101	1	53	-0.3297	0.30027
8	101	1	54	0.0211231	0.679639
8	101	1	55	-0.134256	0.571782
8	101	1	56	-0.0754966	0.592591
8	101	1	57	0.0135639	0.367364
8	101	1	58	-0.282707	0.412964
8	101	1	59	-0.140773	0.464544
8	101	1	60	-0.186846	0.371292
8	101	1	61	0.0525424	0.648405
8	101	1	62	-0.042676	0.660941
8	102	0	1	0.0168801	0.0662424
8	102	0	2	-0.215843	-0.481272
8	102	0	3	0.00155524	0.18488
8	102	0	4	-0.0659613	0.0949025
8	102	0	5	-0.10118	0.156719
8	102	0	6	-0.0467258	0.166768
8	102	0	7	-0.25344	-0.244353
8	102	0	8	-0.0553674	-0.0411302
8	102	0	9	-0.0226297	0.198243
8	102	0	10	0.163512	0.0506222
8	102	0	11	0.365016	0.732662
8	102	0	12	0.337142	0.276514
8	102	0	13	0.542945	0.819143
8	102	0	14	0.0738704	0.0914533
8	102	0	15	0.21428	0.530107
8	102	0	16	-0.106881	-0.0766044
8	102	0	17	0.1043	0.39308
8	102	0	18	0.246158	0.150166
8	102	0	19	0.201739	0.38408
8	102	0	20	0.0988856	-0.0163483
8	102	0	21	0.348668	0.688719
8	102	0	22	0.638282	0.548464
8	102	1	23	0.14971	0.59094
8	102	1	24	0.97914	0.967079
8	102	1	25	0.311451	0.536723
8	102	1	26	-0.174417	0.0198204
8	102	1	27	-0.417634	0.187575
8	102	1	28	0.338257	0.476085
8	102	1	29	0.087747	0.148726
8	102	1	30	0.103832	0.457019
8	102	1	31	0.154059	0.810097
8	102	1	32	0.220665	0.841999
8	102	1	33	0.458705	0.372965
8	102	1	34	0.215877	0.570565
8	102	1	35	-0.205001	0.34485
8	102	1	36	0.328414	0.430364
8	102	1	37	0.5068	0.996396
8	102	1	38	-0.0325313	0.430122
8	102	1	39	-0.265768	-0.336358
8	102	1	40	0.0353426	0.52284
8	102	1	41	0.0545876	0.659208
8	102	1	42	0.502668	0.729027
8	102	1	43	0.530389	0.874296
8	102	1	44	0.357151	0.623613
8	102	1	45	-0.139084	0.515891
8	102	1	46	0.138599	0.593268
8	102	1	47	1.62016	1.4185
8	102	1	48	0.279624	0.820366
8	102	1	49	0.221109	0.600706
8	102	1	50	0.0403063	0.118152
8	102	1	51	-0.00513702	0.474586
8	102	1	52	0.0691207	0.662868
8	102	1	53	0.170777	0.621069
8	102	1	54	1.71025	2.53692
8	102	1	55	0.236172	0.613279
8	102	1	56	0.173658	0.395789
8	102	1	57	1.25655	1.13013
8	102	1	58	0.67051	0.317265
8	102	1	59	-0.00677713	0.218999
8	102	1	60	1.04187	0.618423
8	102	1	61	0.452317	1.02457
8	102	1	62	0.578905	0.791068
8	103	0	1	-0.287121	-0.10816
8	103	0	2	-0.168598	-0.0358931
8	103	0	3	0.0751618	0.266196
8	103	0	4	-0.029983	0.277228
8	103	0	5	-0.0883406	-0.00732321
8	103	0	6	0.310819	0.337015
8	103	0	7	-0.139997	0.396623
8	103	0	8	0.132537	0.243462
8	103	0	9	0.0551602	0.146007
8	103	0	10	0.139752	0.163826
8	103	0	11	1.04636	0.899615
8	103	0	12	0.279193	0.010888
8	103	0	13	-0.180572	-0.0463658
8	103	0	14	0.0075652	-0.0418461
8	103	0	15	0.0253177	0.266753
8	103	0	16	0.000246878	0.432214
8	103	0	17	0.320595	0.688032
8	103	0	18	0.29554	0.240415
8	103	0	19	0.743287	0.859444
8	103	0	20	0.611296	0.868382
8	103	0	21	0.300275	0.566079
8	103	0	22	0.944614	1.43287
8	103	1	23	0.368296	1.08127
8	103	1	24	0.190518	0.185758
8	103	1	25	0.177789	0.453716
8	103	1	26	0.690036	0.39979
8	103	1	27	1.05565	0.863139
8	103	1	28	NaN	1.43299
8	103	1	29	0.497176	0.629051
8	103	1	30	1.35773	1.91673
8	103	1	31	0.188962	0.647723
8	103	1	32	0.576848	0.960641
8	103	1	33	0.285734	0.644073
8	103	1	34	0.253435	0.59658
8	103	1	35	0.456575	0.295424
8	103	1	36	0.049935	-0.143563
8	103	1	37	0.441149	0.671003
8	103	1	38	0.783302	0.830224
8	103	1	39	0.998143	0.885523
8	103	1	40	0.876717	1.50318
8	103	1	41	0.127045	0.0102545
8	103	1	42	0.00401103	0.943425
8	103	1	43	0.274011	0.506199
8	103	1	44	0.680271	1.51051
8	103	1	45	-0.416675	0.734538
8	103	1	46	0.60384	0.769837
8	103	1	47	0.358491	0.372871
8	103	1	48	0.36302	0.990373
8	103	1	49	1.10037	0.849695
8	103	1	50	0.239602	0.482003
8	103	1	51	0.645156	0.584175
8	103	1	52	-0.103969	0.229301
8	103	1	53	0.0312822	0.657799
8	103	1	54	0.452812	0.56442
8	103	1	55	0.463436	0.825212
8	103	1	56	0.588472	0.987889
8	103	1	57	-0.0284457	0.905994
8	103	1	58	0.597419	0.948033
8	103	1	59	0.200217	0.536
8	103	1	60	0.541642	0.871434
8	103	1	61	0.125619	0.360738
8	103	1	62	0.580652	0.667003
8	104	0	1	-0.126537	-0.358306
8	104	0	2	-0.123987	-0.161228
8	104	0	3	0.0995479	0.0663036
8	104	0	4	-0.618728	-0.473006
8	104	0	5	-0.197586	-0.121699
8	104	0	6	-0.290726	-0.247973
8	104	0	7	-0.0451126	-0.124538
8	104	0	8	-0.093535	-0.0809929
8	104	0	9	-0.213008	-0.0975668
8	104	0	10	-0.15669	0.0976599
8	104	0	11	-0.191713	0.0361808
8	104	0	12	-0.0941014	0.31489
8	104	0	13	-0.0540614	0.589539
8	104	0	14	0.514677	0.830089
8	104	0	15	-0.125857	0.38853
8	104	0	16	0.0223728	0.0883009
8	104	0	17	-0.34109	0.159993
8	104	0	18	-0.0330538	0.375755
8	104	0	19	0.297538	0.646779
8	104	0	20	-0.0490492	0.68431
8	104	0	21	0.130138	0.522018
8	104	0	22	-0.0538478	0.594062
8	104	1	23	0.190091	0.912801
8	104	1	24	0.185295	0.939388
8	104	1	25	0.0644575	0.366248
8	104	1	26	-0.023383	0.136772
8	104	1	27	-0.10397	0.351449
8	104	1	28	0.0634632	0.583799
8	104	1	29	-0.114769	0.817732
8	104	1	30	0.217667	0.85246
8	104	1	31	0.0767971	0.40319
8	104	1	32	-0.164811	0.56239
8	104	1	33	-0.108489	0.233961
8	104	1	34	-0.0331402	0.312285
8	104	1	35	-0.244803	0.299872
8	104	1	36	-0.0967983	0.77937
8	104	1	37	-0.417652	0.669543
8	104	1	38	-0.261458	0.215214
8	104	1	39	-0.364772	0.550522
8	104	1	40	-0.436566	0.287423
8	104	1	41	-0.00125556	0.831412
8	104	1	42	-0.139094	0.325771
8	104	1	43	-0.459334	0.680508
8	104	1	44	-0.107339	0.833667
8	104	1	45	-0.129408	0.75907
8	104	1	46	0.00784443	0.399412
8	104	1	47	-0.0669696	0.479968
8	104	1	48	0.581936	0.601068
8	104	1	49	-0.117335	0.703771
8	104	1	50	0.0174537	0.630678
8	104	1	51	0.00342683	0.829713
8	104	1	52	-0.0797319	0.486444
8	104	1	53	0.140989	0.837223
8	104	1	54	-0.0210427	0.685114
8	104	1	55	0.224789	0.93005
8	104	1	56	0.176659	0.471422
8	104	1	57	-0.175067	0.590997
8	104	1	58	-0.134302	0.609069
8	104	1	59	-0.062096	0.611914
8	104	1	60	0.343735	0.869117
8	104	1	61	-0.179551	0.257698
8	104	1	62	0.0508532	0.588619

## Sheet: data-panel-B
Experiment number	Subject ID	Period	Trial number	Hold 2 - Hold 1 (force)	Move force integral
11	146	0	1	-0.0928913	-0.340112
11	146	0	2	-0.0481416	-0.147659
11	146	0	3	-0.192017	-0.342182
11	146	0	4	0.416305	-0.0201239
11	146	0	5	0.326309	-0.126881
11	146	0	6	0.0790799	0.0817163
11	146	0	7	-0.00112442	-0.153909
11	146	0	8	0.290546	0.844796
11	146	0	9	0.305301	-0.0181953
11	146	0	10	0.123253	-0.188539
11	146	0	11	0.0668292	0.173222
11	146	0	12	0.320287	0.149695
11	146	0	13	-0.131013	0.255665
11	146	0	14	-0.0736325	0.277104
11	146	0	15	0.569162	0.627738
11	146	0	16	0.592503	0.421358
11	146	0	17	0.0241112	0.444597
11	146	0	18	-0.0155567	0.0954464
11	146	0	19	0.468361	0.487797
11	146	0	20	-0.0566784	0.158331
11	146	0	21	-0.297203	0.219035
11	146	0	22	-0.00550668	-0.0711758
11	146	1	23	0.450268	0.439814
11	146	1	24	0.28642	0.649898
11	146	1	25	0.3849	0.121278
11	146	1	26	0.235916	0.352391
11	146	1	27	0.253327	0.0357765
11	146	1	28	0.873545	0.690995
11	146	1	29	0.362554	0.586505
11	146	1	30	0.277523	0.27238
11	146	1	31	0.489718	0.855336
11	146	1	32	0.210684	0.360758
11	146	1	33	0.31923	0.466629
11	146	1	34	0.152152	0.57048
11	146	1	35	0.343269	0.430334
11	146	1	36	0.598788	0.189676
11	146	1	37	0.360653	0.34963
11	146	1	38	0.669019	0.480376
11	146	1	39	0.583953	0.438762
11	146	1	40	0.298679	0.32416
11	146	1	41	0.382905	0.362316
11	146	1	42	0.165075	-0.123345
11	146	1	43	0.528996	0.338214
11	146	1	44	0.28934	0.142286
11	146	1	45	-0.0798126	-0.0776392
11	146	1	46	0.239492	-0.0676713
11	146	1	47	-1.43091	-0.0500112
11	146	1	48	0.528676	0.0568672
11	146	1	49	0.175399	0.294084
11	146	1	50	0.327196	0.103008
11	146	1	51	0.196124	0.0850223
11	146	1	52	0.19995	-0.259517
11	146	1	53	-0.0170356	-0.35535
11	146	1	54	0.267631	0.11183
11	146	1	55	0.126349	0.0315027
11	146	1	56	-0.0144125	-0.0595509
11	146	1	57	0.182569	-0.0933425
11	146	1	58	0.12596	-0.103526
11	146	1	59	0.344818	0.0254943
11	146	1	60	0.44563	-0.0709792
11	146	1	61	0.813406	0.600844
11	146	1	62	0.24824	-0.105931
11	147	0	1	0.0253574	0.130208
11	147	0	2	0.0751779	0.132452
11	147	0	3	0.0117091	0.128365
11	147	0	4	-0.38692	0.064696
11	147	0	5	-0.0260259	0.157037
11	147	0	6	0.0725026	0.128622
11	147	0	7	0.581832	0.534619
11	147	0	8	0.616309	0.451989
11	147	0	9	0.40382	0.328977
11	147	0	10	0.414808	0.51481
11	147	0	11	0.432553	0.492066
11	147	0	12	0.605882	0.628378
11	147	0	13	0.529056	0.614239
11	147	0	14	0.69633	0.336786
11	147	0	15	1.52616	0.73639
11	147	0	16	0.54427	0.693399
11	147	0	17	0.877555	0.472768
11	147	0	18	1.42007	0.710473
11	147	0	19	1.15244	0.728589
11	147	0	20	1.3492	1.25029
11	147	0	21	1.22937	0.40235
11	147	0	22	0.80938	0.587148
11	147	1	23	0.881302	0.768703
11	147	1	24	1.07864	0.905632
11	147	1	25	0.469046	0.461432
11	147	1	26	1.13522	0.442404
11	147	1	27	0.780996	0.630662
11	147	1	28	0.127229	0.293361
11	147	1	29	0.631931	0.741286
11	147	1	30	0.76848	0.468149
11	147	1	31	0.429726	-0.0210259
11	147	1	32	0.20631	0.646291
11	147	1	33	0.371943	0.473134
11	147	1	34	0.391779	0.566144
11	147	1	35	0.554119	0.421979
11	147	1	36	0.291585	0.189118
11	147	1	37	0.711628	0.666682
11	147	1	38	0.7155	0.493815
11	147	1	39	0.46931	0.300973
11	147	1	40	0.199185	0.569105
11	147	1	41	0.267434	0.379172
11	147	1	42	0.741261	0.633421
11	147	1	43	0.727061	0.195759
11	147	1	44	0.900947	0.45931
11	147	1	45	0.314442	0.17811
11	147	1	46	0.686116	0.209465
11	147	1	47	0.142399	0.105364
11	147	1	48	0.0195535	0.174539
11	147	1	49	0.737788	0.380884
11	147	1	50	0.375374	0.362619
11	147	1	51	0.456122	0.412263
11	147	1	52	0.156404	0.316978
11	147	1	53	0.41936	-0.173872
11	147	1	54	-0.00183106	-0.05823
11	147	1	55	0.352077	-0.0655321
11	147	1	56	-0.00656047	-0.506598
11	147	1	57	0.518965	0.0787297
11	147	1	58	0.343589	0.358969
11	147	1	59	0.557517	0.403685
11	147	1	60	0.217612	-0.124607
11	147	1	61	0.134358	0.11668
11	147	1	62	0.200432	-0.0390968
11	148	0	1	-0.156207	0.0636514
11	148	0	2	0.185808	0.0222397
11	148	0	3	0.1219	0.104174
11	148	0	4	0.148508	0.0070293
11	148	0	5	0.266314	0.386026
11	148	0	6	-0.0892201	0.133373
11	148	0	7	0.177706	0.45408
11	148	0	8	0.522247	0.458735
11	148	0	9	0.451338	0.00292285
11	148	0	10	0.471257	0.65495
11	148	0	11	0.186181	0.376767
11	148	0	12	0.439684	0.615857
11	148	0	13	0.271128	0.247474
11	148	0	14	0.806635	0.950501
11	148	0	15	0.592423	0.969823
11	148	0	16	0.235731	0.509142
11	148	0	17	0.191563	0.46599
11	148	0	18	0.168305	0.663569
11	148	0	19	0.807351	1.4277
11	148	0	20	0.493826	0.358015
11	148	0	21	0.602514	1.08224
11	148	0	22	0.304009	0.886892
11	148	1	23	0.249285	0.419974
11	148	1	24	-0.048784	0.216535
11	148	1	25	0.689926	0.82139
11	148	1	26	0.356775	0.879086
11	148	1	27	0.654028	0.812361
11	148	1	28	0.401945	0.600816
11	148	1	29	0.322822	0.788536
11	148	1	30	0.261683	0.306329
11	148	1	31	0.148307	0.84676
11	148	1	32	0.198962	0.481566
11	148	1	33	0.148242	0.657234
11	148	1	34	-0.142358	-0.00254088
11	148	1	35	0.982647	1.04749
11	148	1	36	0.200447	0.176363
11	148	1	37	0.784809	2.37674
11	148	1	38	0.776049	2.50109
11	148	1	39	0.868339	1.52996
11	148	1	40	0.411094	0.973676
11	148	1	41	-0.416699	0.30957
11	148	1	42	-0.14121	0.771271
11	148	1	43	0.510209	1.76478
11	148	1	44	0.603346	1.04012
11	148	1	45	0.957978	1.70784
11	148	1	46	-0.375965	0.187785
11	148	1	47	0.280122	0.846431
11	148	1	48	-0.200536	0.9221
11	148	1	49	-0.0379326	0.661551
11	148	1	50	0.36479	0.662658
11	148	1	51	0.402703	1.07692
11	148	1	52	-0.983089	1.12299
11	148	1	53	0.193912	0.0276347
11	148	1	54	0.0128054	0.459216
11	148	1	55	-0.113587	0.544488
11	148	1	56	0.345567	0.584599
11	148	1	57	-0.388796	0.120681
11	148	1	58	0.0400128	0.194604
11	148	1	59	0.0994386	0.680122
11	148	1	60	0.0928824	0.485373
11	148	1	61	-0.0981328	-0.0569813
11	148	1	62	-0.00636636	-0.418478
11	149	0	1	-0.0279462	0.152716
11	149	0	2	0.20642	0.316982
11	149	0	3	0.0958789	0.271875
11	149	0	4	0.296836	0.452408
11	149	0	5	0.309523	0.367954
11	149	0	6	0.305561	0.389734
11	149	0	7	0.332339	0.756762
11	149	0	8	0.0168448	-0.323823
11	149	0	9	0.375166	0.639393
11	149	0	10	0.103439	0.616199
11	149	0	11	0.246819	0.589669
11	149	0	12	0.213008	0.261244
11	149	0	13	0.159143	0.471204
11	149	0	14	0.287975	0.739647
11	149	0	15	0.364044	0.815413
11	149	0	16	0.433061	0.702641
11	149	0	17	0.299791	0.701027
11	149	0	18	0.513171	1.01953
11	149	0	19	0.252405	0.706248
11	149	0	20	0.265362	0.554055
11	149	0	21	0.355621	0.769232
11	149	0	22	0.425067	1.00697
11	149	1	23	0.393451	0.993467
11	149	1	24	0.210793	0.510478
11	149	1	25	0.417075	0.666541
11	149	1	26	0.612678	0.806622
11	149	1	27	0.258423	0.677211
11	149	1	28	0.337592	0.837752
11	149	1	29	0.706886	0.691735
11	149	1	30	0.2203	0.463987
11	149	1	31	0.937304	1.19026
11	149	1	32	0.165981	0.459051
11	149	1	33	0.196796	0.732651
11	149	1	34	0.277774	0.234667
11	149	1	35	0.381051	0.536178
11	149	1	36	0.203842	0.650733
11	149	1	37	0.189528	0.19946
11	149	1	38	0.284439	0.389105
11	149	1	39	0.403385	0.417409
11	149	1	40	0.571569	0.61868
11	149	1	41	0.214884	0.085859
11	149	1	42	0.485495	0.33471
11	149	1	43	0.165604	0.261087
11	149	1	44	0.13355	0.369028
11	149	1	45	0.280527	0.36633
11	149	1	46	0.186904	0.0444641
11	149	1	47	0.0296707	0.177491
11	149	1	48	0.183253	0.170463
11	149	1	49	0.349739	0.145375
11	149	1	50	0.309946	-0.0902316
11	149	1	51	0.1853	0.127218
11	149	1	52	0.309558	0.0935252
11	149	1	53	0.284866	0.081634
11	149	1	54	0.234271	0.223397
11	149	1	55	0.447653	0.210463
11	149	1	56	0.134409	-0.00454918
11	149	1	57	0.259035	0.0589673
11	149	1	58	0.199654	-0.0988681
11	149	1	59	0.110879	0.129601
11	149	1	60	0.182282	0.342767
11	149	1	61	0.29615	0.216034
11	149	1	62	0.270907	-0.0162692
11	150	0	1	0.0718928	0.0989422
11	150	0	2	0.081815	0.316932
11	150	0	3	0.220803	0.214354
11	150	0	4	0.114818	0.070156
11	150	0	5	0.2124	0.264539
11	150	0	6	0.156498	0.152994
11	150	0	7	0.147294	0.219222
11	150	0	8	0.235612	0.321566
11	150	0	9	0.597256	0.545947
11	150	0	10	0.458283	0.40151
11	150	0	11	0.283525	0.178218
11	150	0	12	0.236119	0.108212
11	150	0	13	0.167936	0.136028
11	150	0	14	0.171236	0.451135
11	150	0	15	0.535813	0.64202
11	150	0	16	0.326023	0.526898
11	150	0	17	0.530818	0.425723
11	150	0	18	0.142205	0.433225
11	150	0	19	0.722623	0.859668
11	150	0	20	0.218416	0.534363
11	150	0	21	0.386492	0.614224
11	150	0	22	0.37349	0.73058
11	150	1	23	0.3464	0.517832
11	150	1	24	0.22639	0.601292
11	150	1	25	0.47845	0.668224
11	150	1	26	0.339712	0.687129
11	150	1	27	0.248728	0.569706
11	150	1	28	0.278091	0.66484
11	150	1	29	0.455384	0.556994
11	150	1	30	0.440737	0.690298
11	150	1	31	0.375079	0.56867
11	150	1	32	0.252956	0.339665
11	150	1	33	0.439791	0.569829
11	150	1	34	0.389855	0.217884
11	150	1	35	0.271943	0.335639
11	150	1	36	0.369844	0.25349
11	150	1	37	0.28823	0.215955
11	150	1	38	0.253386	0.234943
11	150	1	39	0.243815	0.353299
11	150	1	40	0.243667	0.326346
11	150	1	41	0.236545	0.304756
11	150	1	42	0.337453	0.524948
11	150	1	43	0.154893	0.285093
11	150	1	44	0.184483	0.307084
11	150	1	45	0.37666	0.121968
11	150	1	46	0.40799	0.324842
11	150	1	47	0.131629	0.111673
11	150	1	48	0.149566	0.288221
11	150	1	49	0.310711	0.267058
11	150	1	50	0.176122	0.158791
11	150	1	51	0.262352	-0.219122
11	150	1	52	0.33184	0.125726
11	150	1	53	0.272115	0.0720659
11	150	1	54	0.194068	0.141127
11	150	1	55	0.235642	0.153889
11	150	1	56	0.150349	0.0674381
11	150	1	57	0.130449	-0.0845449
11	150	1	58	0.134169	0.049967
11	150	1	59	0.322628	-0.0290898
11	150	1	60	0.27007	-0.0180505
11	150	1	61	0.128611	-0.00695411
11	150	1	62	0.289695	0.0622456
11	151	0	1	-0.0287306	-0.0336017
11	151	0	2	-0.29967	-0.805614
11	151	0	3	0.122116	0.0486668
11	151	0	4	-0.112912	0.37444
11	151	0	5	0.000854564	0.0651764
11	151	0	6	0.450897	0.386804
11	151	0	7	0.00626121	0.380912
11	151	0	8	0.342073	0.240415
11	151	0	9	0.0830922	0.119941
11	151	0	10	0.0261066	0.331424
11	151	0	11	0.0863498	0.347824
11	151	0	12	0.575961	0.386413
11	151	0	13	0.255671	0.446302
11	151	0	14	0.102734	0.304694
11	151	0	15	0.147876	0.364015
11	151	0	16	0.16584	0.61984
11	151	0	17	0.0129059	0.216123
11	151	0	18	0.455186	0.557036
11	151	0	19	0.542428	0.774202
11	151	0	20	0.860422	1.08625
11	151	0	21	0.112544	0.130673
11	151	0	22	0.796448	0.84011
11	151	1	23	0.69721	0.788325
11	151	1	24	0.159279	0.461345
11	151	1	25	0.00131414	0.121779
11	151	1	26	0.20524	0.160516
11	151	1	27	0.831689	0.888962
11	151	1	28	0.217833	0.306405
11	151	1	29	0.591255	0.375207
11	151	1	30	0.564679	0.667286
11	151	1	31	0.0771552	0.0447306
11	151	1	32	0.275024	0.155584
11	151	1	33	0.041956	0.224086
11	151	1	34	0.238774	0.31306
11	151	1	35	0.515402	0.514667
11	151	1	36	0.173572	0.1728
11	151	1	37	0.375066	0.0835475
11	151	1	38	0.860652	1.10368
11	151	1	39	0.122993	0.254442
11	151	1	40	0.239596	0.627701
11	151	1	41	0.168975	-0.0158955
11	151	1	42	0.187014	0.306736
11	151	1	43	0.746203	0.439014
11	151	1	44	0.116856	0.0113517
11	151	1	45	-0.0948326	-0.240936
11	151	1	46	0.117212	0.0210986
11	151	1	47	0.334032	0.0400159
11	151	1	48	0.024589	0.00672477
11	151	1	49	0.0290065	0.0223095
11	151	1	50	0.238887	0.341215
11	151	1	51	0.203768	0.0516165
11	151	1	52	0.0630737	0.294872
11	151	1	53	0.123169	0.0343912
11	151	1	54	0.511733	0.202752
11	151	1	55	0.890488	0.407337
11	151	1	56	-0.052106	-0.0511378
11	151	1	57	-0.0789291	-0.341987
11	151	1	58	0.354844	0.148782
11	151	1	59	0.0669267	-0.162305
11	151	1	60	-0.0201122	-0.0875727
11	151	1	61	0.0425686	-0.0946448
11	151	1	62	-0.0565598	-0.274753
11	152	0	1	-0.0239858	0.0499538
11	152	0	2	0.0418095	0.0791121
11	152	0	3	-0.00726613	0.234173
11	152	0	4	-0.0995511	-0.245637
11	152	0	5	-0.0255959	0.051096
11	152	0	6	0.143102	0.378455
11	152	0	7	-0.0561191	0.427251
11	152	0	8	-0.0415864	0.274522
11	152	0	9	0.067669	0.312815
11	152	0	10	-0.0338243	0.336943
11	152	0	11	0.0885197	0.472661
11	152	0	12	0.303515	0.610118
11	152	0	13	0.827206	1.00252
11	152	0	14	0.117484	-0.555489
11	152	0	15	-0.104086	0.417748
11	152	0	16	-0.132609	0.657772
11	152	0	17	-0.0090951	0.422022
11	152	0	18	-0.0853334	-0.00996832
11	152	0	19	0.18248	0.852202
11	152	0	20	0.00112876	0.817095
11	152	0	21	-0.394914	0.580239
11	152	0	22	-0.123976	0.492644
11	152	1	23	0.25067	0.762191
11	152	1	24	-0.834065	0.347808
11	152	1	25	-0.0679716	-0.0439704
11	152	1	26	-0.0215046	0.313934
11	152	1	27	-0.131857	0.269505
11	152	1	28	0.259272	0.292425
11	152	1	29	-0.0231089	0.228858
11	152	1	30	0.256808	0.231451
11	152	1	31	-0.0823461	-0.207476
11	152	1	32	0.161395	0.514951
11	152	1	33	-0.298232	0.291702
11	152	1	34	-0.0990555	0.337133
11	152	1	35	-0.0301079	0.348499
11	152	1	36	-0.326065	-0.39772
11	152	1	37	0.810252	1.39122
11	152	1	38	0.255273	0.354323
11	152	1	39	0.204877	0.688689
11	152	1	40	0.0901495	0.308772
11	152	1	41	-0.12058	0.284762
11	152	1	42	-0.053343	0.142231
11	152	1	43	-0.0143659	0.194623
11	152	1	44	0.276709	0.00487811
11	152	1	45	-0.17577	0.250592
11	152	1	46	-0.172444	0.216525
11	152	1	47	0.860516	1.04641
11	152	1	48	-0.283801	0.335437
11	152	1	49	0.28368	0.207746
11	152	1	50	-0.374046	-0.17456
11	152	1	51	-0.0880771	-0.255839
11	152	1	52	-0.0677388	0.176337
11	152	1	53	-0.313245	-0.23985
11	152	1	54	-0.369973	0.00318946
11	152	1	55	0.445706	0.53099
11	152	1	56	-0.0375025	0.198911
11	152	1	57	0.0101489	0.629598
11	152	1	58	-0.137002	0.0535929
11	152	1	59	-0.025759	-0.485193
11	152	1	60	-0.088223	-0.400623
11	152	1	61	0.374371	-0.00458586
11	152	1	62	-0.159076	-0.53399
11	153	0	1	-0.196342	-0.172134
11	153	0	2	0.00142787	0.110256
11	153	0	3	0.160977	0.180155
11	153	0	4	-0.133825	-0.136471
11	153	0	5	0.083235	0.167104
11	153	0	6	0.0522569	0.179212
11	153	0	7	0.206203	0.314125
11	153	0	8	-0.033479	0.0601438
11	153	0	9	0.170447	0.265933
11	153	0	10	0.479886	0.269704
11	153	0	11	-0.0820524	0.0488807
11	153	0	12	0.00854355	0.219117
11	153	0	13	-0.0718229	0.121434
11	153	0	14	0.0593005	0.231913
11	153	0	15	0.0644239	0.307351
11	153	0	16	-0.0466459	0.258342
11	153	0	17	-0.0416581	0.219054
11	153	0	18	0.372903	0.480015
11	153	0	19	0.339121	0.66718
11	153	0	20	0.410517	0.542286
11	153	0	21	0.133407	0.585988
11	153	0	22	0.20331	0.202778
11	153	1	23	0.186631	0.536877
11	153	1	24	0.736318	0.790188
11	153	1	25	0.455809	0.465387
11	153	1	26	0.317981	0.649794
11	153	1	27	0.137939	0.279423
11	153	1	28	0.42678	0.460369
11	153	1	29	-0.163205	-0.00495933
11	153	1	30	-0.189236	-0.0417337
11	153	1	31	0.304094	0.525606
11	153	1	32	0.157698	0.325639
11	153	1	33	0.175412	0.332495
11	153	1	34	0.561456	0.52792
11	153	1	35	0.211376	0.0995348
11	153	1	36	-0.134506	0.25997
11	153	1	37	0.0776364	-0.0220042
11	153	1	38	0.26931	0.263442
11	153	1	39	-0.413942	-0.312817
11	153	1	40	0.130313	0.20008
11	153	1	41	0.00692688	0.00201856
11	153	1	42	-0.0613502	0.118313
11	153	1	43	0.0816166	0.230073
11	153	1	44	0.176326	0.196415
11	153	1	45	-0.0264192	-0.047341
11	153	1	46	0.0407567	0.28526
11	153	1	47	0.133625	0.153917
11	153	1	48	0.30599	0.386951
11	153	1	49	-0.279053	0.00860003
11	153	1	50	-0.0743387	0.0519494
11	153	1	51	0.112265	0.00116064
11	153	1	52	0.410238	0.367907
11	153	1	53	-0.0667893	0.0461395
11	153	1	54	0.177281	0.0528999
11	153	1	55	0.133266	-0.099722
11	153	1	56	-0.183819	0.11926
11	153	1	57	0.235519	0.0403097
11	153	1	58	-0.0477152	-0.199757
11	153	1	59	0.0429762	0.0675157
11	153	1	60	0.0208106	-0.128896
11	153	1	61	-0.18201	0.0499828
11	153	1	62	0.222672	-0.0418192
11	154	0	1	-0.0775212	0.242223
11	154	0	2	-0.170846	-0.198952
11	154	0	3	0.149246	0.475686
11	154	0	4	-0.104455	-0.0390798
11	154	0	5	-0.347113	-0.0751736
11	154	0	6	0.325496	0.339012
11	154	0	7	-0.616081	-0.205493
11	154	0	8	-0.304967	-0.185616
11	154	0	9	-0.00114914	-0.114493
11	154	0	10	0.0782087	0.629829
11	154	0	11	0.0404058	0.41077
11	154	0	12	0.176342	0.0415076
11	154	0	13	0.625135	0.384025
11	154	0	14	0.258158	0.493886
11	154	0	15	-0.0160098	0.334597
11	154	0	16	0.126842	0.629138
11	154	0	17	0.903869	0.878688
11	154	0	18	0.759099	1.00851
11	154	0	19	0.742789	1.18272
11	154	0	20	0.394413	0.749276
11	154	0	21	0.0241409	0.659348
11	154	0	22	-0.0786121	0.635762
11	154	1	23	-0.0822429	1.23753
11	154	1	24	1.14609	1.6257
11	154	1	25	0.32329	0.581233
11	154	1	26	-0.253427	0.0995964
11	154	1	27	-0.730571	-0.26892
11	154	1	28	-0.102201	0.500497
11	154	1	29	-0.453899	0.13022
11	154	1	30	0.345757	0.245817
11	154	1	31	-0.186505	0.518661
11	154	1	32	0.0780069	0.0672783
11	154	1	33	0.432864	0.494031
11	154	1	34	0.379431	0.633181
11	154	1	35	0.0320726	0.848314
11	154	1	36	-0.0371454	0.568986
11	154	1	37	0.0653747	0.354788
11	154	1	38	-0.155259	-0.345121
11	154	1	39	0.22743	0.375349
11	154	1	40	-0.288233	0.213655
11	154	1	41	0.00212093	0.439545
11	154	1	42	0.0768335	0.475911
11	154	1	43	0.194883	0.778376
11	154	1	44	-0.194033	0.203887
11	154	1	45	0.493089	0.60983
11	154	1	46	-0.474217	0.723003
11	154	1	47	0.554713	0.617625
11	154	1	48	0.563121	0.874752
11	154	1	49	0.785443	0.584568
11	154	1	50	-0.39808	-0.231078
11	154	1	51	-0.179751	0.105046
11	154	1	52	-0.492811	0.0172556
11	154	1	53	-0.375074	-0.629986
11	154	1	54	-0.796793	-0.0196289
11	154	1	55	-0.314532	0.172521
11	154	1	56	-0.362504	-0.791219
11	154	1	57	-0.180818	0.211197
11	154	1	58	-0.448897	-0.436722
11	154	1	59	0.203544	-0.158203
11	154	1	60	-0.120445	0.808501
11	154	1	61	-0.00668294	0.107451
11	154	1	62	-0.294604	-0.0746594
11	155	0	1	0.0445739	0.223759
11	155	0	2	-0.0491105	0.236607
11	155	0	3	-0.0948902	-0.0776503
11	155	0	4	-0.281037	0.0612579
11	155	0	5	0.0109816	0.451606
11	155	0	6	0.632928	0.474437
11	155	0	7	0.00716961	0.375241
11	155	0	8	0.0731354	0.461404
11	155	0	9	0.121126	0.519135
11	155	0	10	-0.235834	0.191396
11	155	0	11	0.603123	0.450791
11	155	0	12	0.717076	0.400389
11	155	0	13	0.0742399	0.422499
11	155	0	14	0.122565	0.753952
11	155	0	15	0.113729	0.655869
11	155	0	16	-0.0135475	0.290798
11	155	0	17	0.425475	0.515864
11	155	0	18	0.0880788	0.523756
11	155	0	19	0.0365869	0.514918
11	155	0	20	0.459055	0.7844
11	155	0	21	-0.0915782	0.594048
11	155	0	22	0.142359	0.706672
11	155	1	23	0.113173	0.660124
11	155	1	24	0.51981	1.10876
11	155	1	25	0.343094	1.02852
11	155	1	26	0.14012	0.527525
11	155	1	27	0.177422	0.36283
11	155	1	28	0.496058	0.478519
11	155	1	29	-0.0167528	0.418242
11	155	1	30	0.463536	0.450073
11	155	1	31	0.439244	0.512649
11	155	1	32	0.116151	0.310128
11	155	1	33	-0.0533452	0.0922996
11	155	1	34	0.182909	0.336478
11	155	1	35	0.0109135	0.41529
11	155	1	36	-0.311524	-0.0385695
11	155	1	37	0.206218	0.452936
11	155	1	38	0.147693	-0.0415645
11	155	1	39	0.318063	1.08022
11	155	1	40	-0.0775274	0.39542
11	155	1	41	0.224263	0.37946
11	155	1	42	0.103553	0.386783
11	155	1	43	0.505145	0.0951843
11	155	1	44	0.253969	0.348536
11	155	1	45	0.106597	0.111193
11	155	1	46	0.07684	0.0400245
11	155	1	47	-0.105515	0.255783
11	155	1	48	0.247981	-0.255154
11	155	1	49	0.334786	0.0844265
11	155	1	50	0.334341	-0.168413
11	155	1	51	-0.478446	-0.605265
11	155	1	52	-0.0662453	0.162838
11	155	1	53	0.148914	-0.0865176
11	155	1	54	-0.211141	0.00249755
11	155	1	55	-0.148081	-0.189817
11	155	1	56	-0.413658	-0.114344
11	155	1	57	-0.252566	-0.409822
11	155	1	58	0.0296287	0.16567
11	155	1	59	0.227509	-0.24179
11	155	1	60	-0.0480687	-0.0552063
11	155	1	61	-0.361806	0.773914
11	155	1	62	-0.323743	-0.497801
11	156	0	1	-0.0900233	-0.0335993
11	156	0	2	-0.149902	-0.4326
11	156	0	3	-0.205134	0.0444528
11	156	0	4	-0.133443	0.168474
11	156	0	5	-0.0424452	0.0443093
11	156	0	6	-0.247182	-0.403994
11	156	0	7	-0.15197	0.486682
11	156	0	8	0.053451	0.331013
11	156	0	9	0.11121	0.212342
11	156	0	10	0.024399	0.29018
11	156	0	11	0.192944	0.829099
11	156	0	12	0.243724	0.47222
11	156	0	13	0.0245135	0.14652
11	156	0	14	0.249257	0.90343
11	156	0	15	-0.147281	0.122787
11	156	0	16	-0.00458781	0.399562
11	156	0	17	0.278244	0.708082
11	156	0	18	-0.0480303	0.407046
11	156	0	19	0.0796426	0.723096
11	156	0	20	0.464846	1.05936
11	156	0	21	0.277087	0.936384
11	156	0	22	-0.231111	0.0511525
11	156	1	23	0.244211	0.730479
11	156	1	24	0.114273	0.210596
11	156	1	25	-0.0425235	0.490826
11	156	1	26	0.24201	0.482559
11	156	1	27	0.0205803	0.259451
11	156	1	28	-0.0738234	0.64226
11	156	1	29	0.0428008	0.434842
11	156	1	30	0.262207	1.09391
11	156	1	31	0.0852542	0.793188
11	156	1	32	-0.0805195	0.307698
11	156	1	33	-0.176336	0.735574
11	156	1	34	0.168987	0.481637
11	156	1	35	-0.0215977	0.334738
11	156	1	36	0.127023	0.429443
11	156	1	37	0.0572282	0.222852
11	156	1	38	-0.129162	-0.0633502
11	156	1	39	0.00796372	0.708696
11	156	1	40	1.45068	1.46341
11	156	1	41	-0.0631782	0.677658
11	156	1	42	-0.129136	0.576995
11	156	1	43	-0.0443598	0.594274
11	156	1	44	0.0759012	0.550349
11	156	1	45	0.0673671	0.443665
11	156	1	46	0.341133	0.624313
11	156	1	47	0.497651	0.562834
11	156	1	48	0.043954	0.479649
11	156	1	49	0.225667	0.523542
11	156	1	50	0.0439083	0.664944
11	156	1	51	-0.0292749	0.578795
11	156	1	52	0.192557	0.275015
11	156	1	53	0.0445659	0.370641
11	156	1	54	0.0434226	0.613408
11	156	1	55	0.213508	0.435725
11	156	1	56	0.155319	0.262062
11	156	1	57	-0.142655	0.38958
11	156	1	58	0.0325713	0.414301
11	156	1	59	0.00670651	0.099912
11	156	1	60	0.253936	0.10982
11	156	1	61	0.0331209	0.0561764
11	156	1	62	0.391954	0.194223
11	157	0	1	0.132899	-0.130824
11	157	0	2	0.398728	-0.163751
11	157	0	3	-0.1356	-0.228
11	157	0	4	0.0434271	0.0600018
11	157	0	5	-0.0876722	-0.113165
11	157	0	6	0.00733862	-0.0514887
11	157	0	7	-0.313318	-0.175889
11	157	0	8	-0.0248605	0.0268126
11	157	0	9	-0.0250698	0.411951
11	157	0	10	0.152415	0.117954
11	157	0	11	0.00537628	0.381483
11	157	0	12	0.500141	0.614166
11	157	0	13	0.952729	0.698872
11	157	0	14	0.206903	0.312761
11	157	0	15	0.235969	0.244677
11	157	0	16	0.297185	0.535971
11	157	0	17	0.444874	0.375491
11	157	0	18	0.247707	0.359426
11	157	0	19	0.411725	0.42216
11	157	0	20	-0.0994792	-0.0857368
11	157	0	21	0.330392	0.0716559
11	157	0	22	0.451732	0.598609
11	157	1	23	0.378636	0.46511
11	157	1	24	0.574505	0.454212
11	157	1	25	0.0139366	0.46381
11	157	1	26	0.9427	0.767865
11	157	1	27	0.365444	0.142661
11	157	1	28	0.296864	0.562026
11	157	1	29	-0.0703453	0.32507
11	157	1	30	-0.419396	0.136695
11	157	1	31	0.044686	0.588935
11	157	1	32	0.115045	0.632141
11	157	1	33	-0.00683123	0.284167
11	157	1	34	-0.103438	0.0982067
11	157	1	35	0.198855	0.267043
11	157	1	36	0.479211	0.491357
11	157	1	37	0.362083	0.155525
11	157	1	38	-0.101331	0.298501
11	157	1	39	0.0906368	0.156347
11	157	1	40	-0.02259	0.162402
11	157	1	41	0.613408	0.340589
11	157	1	42	0.485365	0.294027
11	157	1	43	0.293172	-0.0946678
11	157	1	44	-0.0663762	0.182668
11	157	1	45	-0.0660212	-0.0851337
11	157	1	46	-0.0247579	0.114041
11	157	1	47	-0.0545668	-0.00850677
11	157	1	48	0.0085987	-0.195092
11	157	1	49	-0.0604785	-0.0784671
11	157	1	50	0.0180298	-0.00270313
11	157	1	51	0.248705	0.13829
11	157	1	52	0.522962	0.291542
11	157	1	53	0.144624	-0.00778851
11	157	1	54	0.0437855	-0.383235
11	157	1	55	-0.172992	-0.503705
11	157	1	56	0.121163	-0.100817
11	157	1	57	0.326133	0.191282
11	157	1	58	0.170419	0.132444
11	157	1	59	0.217607	-0.53585
11	157	1	60	0.191405	-0.143744
11	157	1	61	-0.137261	-0.20203
11	157	1	62	-0.00410443	-0.137876
11	158	0	1	-0.231387	-0.0186267
11	158	0	2	0.0907851	-0.219807
11	158	0	3	0.0819397	-0.0534084
11	158	0	4	-0.140669	-0.169544
11	158	0	5	-0.00621171	0.114754
11	158	0	6	0.300328	0.172001
11	158	0	7	0.12807	0.0479662
11	158	0	8	0.219976	0.255764
11	158	0	9	0.10825	0.153732
11	158	0	10	0.17841	0.128312
11	158	0	11	0.17683	0.102049
11	158	0	12	0.151578	0.344052
11	158	0	13	-0.0269215	0.0251515
11	158	0	14	-0.0944122	-0.00813876
11	158	0	15	-0.18173	0.0070286
11	158	0	16	0.204535	0.313565
11	158	0	17	0.121548	0.777734
11	158	0	18	-0.100652	-0.0780747
11	158	0	19	-0.370949	0.193876
11	158	0	20	-0.556909	0.595373
11	158	0	21	0.0339209	0.0661252
11	158	0	22	-0.00271621	0.314702
11	158	1	23	0.101427	0.596442
11	158	1	24	-0.0482703	0.518634
11	158	1	25	0.0790972	0.274403
11	158	1	26	-0.0285437	0.415181
11	158	1	27	-0.0397467	0.251022
11	158	1	28	0.0351714	0.140825
11	158	1	29	0.0677996	0.308349
11	158	1	30	0.259074	0.338964
11	158	1	31	0.0179001	0.205539
11	158	1	32	-0.00250364	0.278567
11	158	1	33	0.237714	0.279045
11	158	1	34	-0.0479155	0.17863
11	158	1	35	-0.103922	-0.00370475
11	158	1	36	0.208339	0.406424
11	158	1	37	0.398892	0.101672
11	158	1	38	0.136935	0.222428
11	158	1	39	0.166636	0.0691451
11	158	1	40	0.090919	0.160861
11	158	1	41	0.112191	0.472999
11	158	1	42	0.15936	0.524314
11	158	1	43	0.257697	0.301196
11	158	1	44	0.339937	0.422321
11	158	1	45	0.317786	0.632779
11	158	1	46	0.17847	0.0367239
11	158	1	47	0.272176	-0.0667292
11	158	1	48	0.273579	0.28119
11	158	1	49	-0.0602132	-0.0391067
11	158	1	50	0.0397621	-0.280721
11	158	1	51	0.0381965	0.0437155
11	158	1	52	0.0294145	0.10874
11	158	1	53	0.164095	-0.136286
11	158	1	54	0.306034	-0.123029
11	158	1	55	0.160724	-0.401691
11	158	1	56	0.171668	-0.0617887
11	158	1	57	0.0380653	-0.0802864
11	158	1	58	0.69387	0.28617
11	158	1	59	0.11658	-0.124412
11	158	1	60	0.00483725	-0.139904
11	158	1	61	0.0122546	0.170263
11	158	1	62	0.087572	-0.226302
11	159	0	1	-0.158238	0.0778201
11	159	0	2	0.0169922	0.283628
11	159	0	3	0.22234	0.304472
11	159	0	4	-0.0570294	0.199276
11	159	0	5	-0.159585	-0.166612
11	159	0	6	-0.130677	0.218136
11	159	0	7	0.00563706	0.25112
11	159	0	8	0.00786268	0.271439
11	159	0	9	0.233277	0.163184
11	159	0	10	-0.0936622	0.222869
11	159	0	11	-0.0870846	0.101823
11	159	0	12	0.0916776	0.550475
11	159	0	13	-0.0449997	0.274798
11	159	0	14	-0.0592862	0.286255
11	159	0	15	0.00289617	0.574076
11	159	0	16	-0.100626	0.252404
11	159	0	17	-0.06629	0.367005
11	159	0	18	0.137343	0.593835
11	159	0	19	-0.0103817	0.545388
11	159	0	20	-0.0832875	0.752809
11	159	0	21	0.072785	0.844847
11	159	0	22	-0.0760032	0.397732
11	159	1	23	-0.0466121	0.597702
11	159	1	24	-0.0222908	0.492883
11	159	1	25	0.00599579	0.564725
11	159	1	26	0.0684028	0.407451
11	159	1	27	-0.0494368	0.391824
11	159	1	28	-0.00834838	0.174932
11	159	1	29	-0.0415341	0.232073
11	159	1	30	0.0653082	0.695347
11	159	1	31	-0.0637283	0.483786
11	159	1	32	0.0161433	0.306335
11	159	1	33	-0.0753637	0.513063
11	159	1	34	-0.119613	0.233915
11	159	1	35	-0.144462	0.183388
11	159	1	36	-0.00639485	0.456053
11	159	1	37	-0.158705	0.0865871
11	159	1	38	-0.101563	0.083854
11	159	1	39	0.279871	0.252823
11	159	1	40	-0.0765033	0.726695
11	159	1	41	0.0574892	0.288087
11	159	1	42	-0.184906	-0.217277
11	159	1	43	-0.131673	-0.159215
11	159	1	44	0.200676	0.470286
11	159	1	45	-0.115647	-0.150587
11	159	1	46	-0.241534	-0.0781799
11	159	1	47	-0.0441098	0.0246037
11	159	1	48	-0.0605627	-0.0137988
11	159	1	49	0.14404	0.350352
11	159	1	50	-0.179379	0.482251
11	159	1	51	-0.046124	0.202505
11	159	1	52	-0.254387	0.111648
11	159	1	53	-0.200841	0.43763
11	159	1	54	-0.138408	-0.0497222
11	159	1	55	-0.120799	0.435971
11	159	1	56	-0.201226	0.461983
11	159	1	57	-0.179262	1.0211
11	159	1	58	-0.0119465	1.40537
11	159	1	59	-0.144773	1.42556
11	159	1	60	-0.103956	0.562335
11	159	1	61	-0.28863	-0.111556
11	159	1	62	-0.111802	-0.132246
