# Supplementary material for: Postural control of arm and fingers through integration of movement commands
Source: eLife. 2020 Feb 11;9:e52507. doi: 10.7554/eLife.52507 (PMC7062460; doi:10.7554/eLife.52507)
Supplement: Figure 5—source data 1. — We fit a linear spring model (Equations 10 and 11) to the postural fields measured before (Figure 5B left) and after adaptation (Figure 5B right). Here we provide parameters pertaining the null point of the two-dimensional spring and the stiffness of the postural field for individual participants. The ‘readme’ tab describes all quantities reported in the ‘data-panel-D’ tab. [file elife-52507-fig5-data1.xlsx]

## Sheet: readme
Lead author	Scott	Albert
Title	Postural control of arm and fingers through integration of movement commands
Publication year	2020
Journal	eLife
Description	These data are reported in Figure 5 of the manuscript.
Column description (panel D)	Subject ID	This is an ID number assigned to each participant.
	Period	Refers to postural field measured before adaptation (value of 0) and after adaptation (value of 1)
	xEq	The x-coordinate of the null position of the postural field
	yEq	The y-coordinate of the null position of the postural field
	kxx	The xx component of the stiffness matrix
	kyy	The yy component of the stiffness matrix
	kxy	The xy (and also yx because of symmetry) component of the stiffness matrix
	angle	The angle describing the principal eigenvector of the stiffness matrix
	magnitude	The Frobenius norm of the stiffness matrix
Notes	We fit a two-dimensional linear spring model to the postural field measured before and after adaptation.
	We assumed the 2 x 2 stiffness matrix to be symmetric.
	We quantified the null point of the linear spring.
	We quantified the magnitude and orientation of the arm's stiffness based on the stiffness matrix.

## Sheet: data-panel-D
Subject ID	Period	xEq	yEq	kxx	kyy	kxy	angle	magnitude
1	0	-0.273609	-0.0688984	1.56748	6.31636	-0.921959	100.61	6.63727
2	0	0.917295	0.479858	0.35116	1.72098	-0.477681	107.447	1.88187
3	0	0.454731	0.354787	0.443775	1.56153	-0.364966	106.573	1.70344
4	0	0.0932913	-0.0775316	0.363237	1.45244	-0.0193864	91.0194	1.49742
5	0	0.0731864	0.0851865	0.961371	4.37324	-1.10255	106.437	4.74138
6	0	-0.252579	-0.0886576	1.91142	5.28278	-2.03783	115.201	6.31402
7	0	0.487718	-0.0879901	0.409559	2.77452	-0.0817412	91.9772	2.80697
8	0	0.739072	0.220404	0.974059	5.70113	-1.10961	102.574	5.99285
9	0	1.505	0.603522	0.667395	4.37149	-1.03766	104.63	4.65927
10	0	0.65804	0.132696	0.907917	6.39852	-0.683053	96.986	6.53441
11	0	0.187118	0.0410156	0.880797	12.4279	-0.938658	94.6172	12.5296
12	0	-1.99996	-0.516613	1.13777	12.5242	0.435693	87.8119	12.5909
13	0	0.0794485	-0.0992476	1.00621	3.64496	-0.494528	100.274	3.84543
14	0	0.668692	0.281549	0.998286	2.94405	-0.472689	102.957	3.17976
15	0	-0.751148	-0.530998	0.295478	1.31579	-0.0903114	95.0194	1.3546
16	0	-0.903015	-0.0375304	0.276047	2.76885	-0.0208226	90.4786	2.78273
17	0	-0.331	0.0340153	0.340038	2.84306	-0.27044	96.0968	2.88875
18	0	-1.40291	-0.0781846	0.28084	1.40228	-0.0732352	93.7206	1.43388
19	0	1.0316	-0.115349	0.45046	6.31491	0.576205	84.4413	6.38319
20	0	0.532319	0.0824253	0.661801	8.01727	-0.975884	97.4305	8.16207
21	0	0.488713	0.00161712	0.975599	5.48637	-0.123626	91.5687	5.57517
22	0	-0.0664645	-0.00607298	0.725885	2.67978	-0.178859	95.1874	2.78785
23	0	-0.171919	-0.176711	0.565916	3.19847	0.0713993	88.4476	3.24972
24	0	-0.385983	-0.202882	3.18949	9.43529	-0.267429	92.4473	9.96697
25	0	0.442855	0.0676194	1.11957	4.75231	-0.914089	103.357	5.05065
26	0	0.143256	-0.388349	0.531353	2.06464	-0.456791	105.394	2.22765
27	0	-0.0295617	0.038698	0.869908	5.80408	-1.08164	101.837	6.06498
1	1	2.36859	-0.15255	0.925995	5.38168	-0.469189	95.9464	5.50093
2	1	1.18842	0.264422	0.603932	1.85066	-0.552453	110.774	2.09763
3	1	2.76978	0.454728	0.347882	1.51864	-0.260058	101.977	1.60079
4	1	1.32097	-0.346485	0.433679	1.30105	-0.048566	93.1948	1.37315
5	1	0.564178	0.181833	0.801875	3.40608	-0.743147	104.857	3.65362
6	1	-0.0273611	-0.255631	1.19211	4.23377	-1.07548	107.633	4.65395
7	1	0.832838	-0.434973	0.523388	2.6205	-0.13956	93.7907	2.67953
8	1	0.702647	0.00430536	2.43145	17.9485	-1.38095	95.0462	18.2174
9	1	2.7911	0.572471	0.366586	3.74418	-0.425769	97.0751	3.80996
10	1	1.07071	0.00838466	0.893965	5.6609	0.200447	87.5964	5.73806
11	1	-0.863368	-0.156827	5.1701	13.6099	-0.824593	95.5283	14.6055
12	1	-0.891368	-0.617049	0.59271	7.82954	-0.261845	92.0695	7.86067
13	1	0.304259	-0.0259896	1.03518	3.30302	-0.302074	97.4585	3.4877
14	1	1.15475	-0.0759912	0.382125	1.81659	-0.263444	100.084	1.89336
15	1	1.03151	-0.127302	0.418432	2.18392	-0.169888	95.4468	2.23658
16	1	1.44847	0.126675	0.33567	2.29183	-0.518022	103.954	2.42938
17	1	0.269288	0.00854567	0.348703	2.64582	-0.179585	94.4433	2.68076
18	1	-0.80056	-0.209918	0.266791	1.57084	-0.234172	99.8778	1.62739
19	1	1.74309	-0.252093	0.641267	5.47518	0.639672	82.588	5.58634
20	1	4	0.0802633	0.29264	7.05842	-0.294731	92.4896	7.07677
21	1	1.57528	0.366301	0.898432	3.72724	-0.71668	103.436	3.9657
22	1	1.1933	0.251618	0.935623	3.10156	-0.837961	108.866	3.44955
23	1	0.419367	-0.30258	0.732534	4.22845	-0.0354996	90.5817	4.29173
24	1	0.466573	-0.324353	1.04954	3.62283	0.00314594	89.93	3.7718
25	1	0.798286	-0.00377899	0.879696	4.91869	-0.893235	101.93	5.15394
26	1	3.135	-0.606976	0.360654	2.1667	-0.135602	94.27	2.20486
27	1	-0.265804	0.024431	0.891879	3.15232	-0.75183	106.816	3.44428
