# Supplementary material for: Postural control of arm and fingers through integration of movement commands
Source: eLife. 2020 Feb 11;9:e52507. doi: 10.7554/eLife.52507 (PMC7062460; doi:10.7554/eLife.52507)
Supplement: Figure 6—source data 1. — In the ‘data-panel-D-force-field’ tab, we report the endpoint error (labeled ‘endpoint correction’ in Figure 6B) measured on all trials in the force field period for each participant. In the ‘data-panel-D-channel’ tab, we report the holding forces and the integral of moving forces measured on channel trials at the end of the adaptation period for each participant. In the ‘data-panel-D-gain-and-error’, we provide single measures of endpoint error and integration gain for each participant, obtained from post-processing of the data provided in the prior two tabs. In ‘data-panel-E’, we provide the integration gain measured for each subject during the null period, early during force field adaptation, and late in force field adaptation. The ‘readme’ tab describes all quantities reported in the other four tabs containing participant data. [file elife-52507-fig6-data1.xlsx]

## Sheet: readme
Lead author	Scott	Albert
Title	Postural control of arm and fingers through integration of movement commands
Publication year	2020
Journal	eLife
Description	These data are reported in Figure 6 of the manuscript.
Column description (panel D force field)	Experiment number	This is an ID that refers to different types of experiments
	Force orientation	Refers to the orientation of the applied force field (0 for CCW and 1 for CW)
	Subject ID	This is an ID number assigned to each participant.
	Trial number	This is the force field trial number on which the data were recorded
	Endpoint error	This is the endpoint error measured late in the trajectory (in centimeters)
Column description (panel D channel)	Experiment number	This is an ID that refers to different types of experiments
	Force orientation	Refers to the orientation of the applied force field (0 for CCW and 1 for CW)
	Subject ID	This is an ID number assigned to each participant.
	Trial number	This is the channel trial number on which the data were recorded in a given block (blocks determined by force orientation)
	Hold 2 - Hold 1 (force)	This is the difference in force measured during holding (hold 2 - hold 1) in Newtons
	Move force integral	This is the integral of force during movement, relative to hold 1 force (units are N-s)
Column description (panel D gain and error)	Experiment number	This is an ID that refers to different types of experiments
	Subject ID	This is an ID number assigned to each participant.
	Endpoint error	This is the endpoint error measured late in the trajectory (in centimeters)
	Hold 2 - Hold 1 (force)	This is the difference in force measured during holding (hold 2 - hold 1) in Newtons
	Move force integral	This is the integral of force during movement, relative to hold 1 force (units are N-s)
	Integration gain	This is the gain of the integration function calculate from the hold force difference and move force integral (units are 1/s)
Notes	To calculate the error measure for each subject, we calculated the mean error across all force field trials. If data were collected in CCW and CW fields, we then average across each.
	To calculate the hold force and move integral measure, we calculated the median value across all channel trials. If data were collected in CCW and CW fields, we then average across each.
	To calculate the gain measure, we divided the hold measure by the move integral measure
Column description (panel D gain and error)	Experiment number	This is an ID that refers to different types of experiments
	Subject ID	This is an ID number assigned to each participant.
	Gain null	This is the gain measured over the null field trials at the start of the experiment
	Gain early adapt	This is the gain measured over the beginning part of the force field adaptation period
	Gain late adapt	This is the gain measured over the late part of the force field adaptation period

## Sheet: data-panel-D-force-field
Experiment number	Force orientation	Subject ID	Trial number	Endpoint error
2	0	8	1	0.00541587
2	0	8	2	0.0114911
2	0	8	3	-0.127274
2	0	8	4	0.00305115
2	0	8	5	0.00084875
2	0	8	6	-0.169848
2	0	8	7	0.00102666
2	0	8	8	0.00353238
2	0	8	9	-0.0272638
2	0	8	10	0.00290638
2	0	8	11	0.00475434
2	0	8	12	0.00840666
2	0	8	13	-0.221326
2	0	8	14	0.254489
2	0	8	15	0.00102513
2	0	8	16	-0.13952
2	0	8	17	0.243795
2	0	8	18	-0.305908
2	0	8	19	-0.129074
2	0	8	20	0.0113724
2	0	8	21	0.0127811
2	0	8	22	0.0121811
2	0	8	23	-0.245643
2	0	8	24	-0.148359
2	0	8	25	0.0878165
2	0	8	26	-0.15933
2	0	8	27	-0.29312
2	0	8	28	0.00449189
2	0	8	29	0.0256076
2	0	8	30	-0.0562328
2	0	8	31	-0.220022
2	0	8	32	0.0430126
2	0	8	33	-0.154256
2	0	8	34	0.0468285
2	0	8	35	0.00433523
2	0	8	36	-0.343059
2	0	8	37	-0.223357
2	0	8	38	-0.0882743
2	0	8	39	0.215181
2	0	8	40	0.00534171
2	0	8	41	-0.154295
2	0	8	42	-0.29259
2	0	8	43	-0.192491
2	0	8	44	-0.295124
2	0	8	45	0.136513
2	0	8	46	0.00170518
2	0	8	47	-0.231193
2	0	8	48	-0.583643
2	0	8	49	0.225422
2	0	8	50	-0.308665
2	0	8	51	0.0180584
2	0	8	52	0.0357037
2	0	8	53	0.00535646
2	0	8	54	0.0102208
2	0	8	55	0.00812891
2	0	8	56	-0.229304
2	0	8	57	-0.177523
2	0	8	58	-0.235577
2	0	8	59	-0.239233
2	0	8	60	0.00815387
2	0	8	61	0.0200254
2	0	8	62	0.00538868
2	0	8	63	-0.131187
2	0	8	64	0.00776733
2	0	8	65	-0.305788
2	0	8	66	0.0175106
2	0	8	67	-0.103428
2	0	8	68	0.00223518
2	0	8	69	-0.392394
2	0	8	70	-0.296596
2	0	8	71	0.0011266
2	0	8	72	0.0172704
2	0	8	73	-0.259088
2	0	8	74	0.0213885
2	0	8	75	0.344898
2	0	8	76	0.0107902
2	0	8	77	-0.348455
2	0	8	78	0.00578099
2	0	8	79	-0.439176
2	0	8	80	0.00687505
2	1	8	1	0.0164971
2	1	8	2	0.0581051
2	1	8	3	0.140152
2	1	8	4	0.194164
2	1	8	5	0.0343888
2	1	8	6	0.233883
2	1	8	7	0.0186798
2	1	8	8	0.0308124
2	1	8	9	0.0322771
2	1	8	10	0.209066
2	1	8	11	0.0789412
2	1	8	12	0.15974
2	1	8	13	0.231028
2	1	8	14	0.0334574
2	1	8	15	0.021054
2	1	8	16	0.027679
2	1	8	17	0.0491067
2	1	8	18	0.0964368
2	1	8	19	0.0392421
2	1	8	20	0.0646793
2	1	8	21	0.146482
2	1	8	22	0.00614056
2	1	8	23	0.118424
2	1	8	24	0.026131
2	1	8	25	0.00400008
2	1	8	26	0.147534
2	1	8	27	0.0345034
2	1	8	28	0.238857
2	1	8	29	0.0942471
2	1	8	30	0.00792102
2	1	8	31	0.0936842
2	1	8	32	0.0137015
2	1	8	33	0.0366806
2	1	8	34	0.024254
2	1	8	35	0.181047
2	1	8	36	0.0674627
2	1	8	37	0.143681
2	1	8	38	0.0996874
2	1	8	39	0.0644088
2	1	8	40	0.0191693
2	1	8	41	0.261815
2	1	8	42	0.119222
2	1	8	43	0.0197497
2	1	8	44	0.192569
2	1	8	45	-0.594077
2	1	8	46	0.0126244
2	1	8	47	0.178259
2	1	8	48	0.0811979
2	1	8	49	-0.184292
2	1	8	50	0.0163176
2	1	8	51	0.0205849
2	1	8	52	-0.650284
2	1	8	53	0.00720408
2	1	8	54	-0.378033
2	1	8	55	0.216742
2	1	8	56	0.0137011
2	1	8	57	0.181551
2	1	8	58	0.000516894
2	1	8	59	-0.426186
2	1	8	60	0.0873868
2	1	8	61	0.00526381
2	1	8	62	0.198429
2	1	8	63	-0.339609
2	1	8	64	0.022072
2	1	8	65	0.203289
2	1	8	66	0.0791874
2	1	8	67	-0.865137
2	1	8	68	0.0302014
2	1	8	69	0.0156438
2	1	8	70	0.115716
2	1	8	71	0.00616857
2	1	8	72	0.00889633
2	1	8	73	0.0131508
2	1	8	74	0.0193418
2	1	8	75	0.00105672
2	1	8	76	0.234999
2	1	8	77	0.0310528
2	1	8	78	-0.188442
2	1	8	79	0.129209
2	1	8	80	0.0116641
2	0	9	1	0.391812
2	0	9	2	0.106783
2	0	9	3	0.286332
2	0	9	4	0.149824
2	0	9	5	0.583137
2	0	9	6	0.027856
2	0	9	7	0.071133
2	0	9	8	0.0345022
2	0	9	9	-0.109954
2	0	9	10	-0.077838
2	0	9	11	-0.242648
2	0	9	12	0.0298
2	0	9	13	0.358252
2	0	9	14	0.34277
2	0	9	15	0.00613279
2	0	9	16	0.00764332
2	0	9	17	-0.127491
2	0	9	18	0.40912
2	0	9	19	0.0333318
2	0	9	20	0.163817
2	0	9	21	0.0396995
2	0	9	22	0.470949
2	0	9	23	0.0415959
2	0	9	24	0.0322933
2	0	9	25	0.0117034
2	0	9	26	0.00150493
2	0	9	27	0.0964449
2	0	9	28	0.0100792
2	0	9	29	0.00688208
2	0	9	30	0.0188582
2	0	9	31	-0.0993592
2	0	9	32	9.32626e-07
2	0	9	33	0.00708332
2	0	9	34	0.00595615
2	0	9	35	0.041434
2	0	9	36	0.0538429
2	0	9	37	0.0109994
2	0	9	38	0.149904
2	0	9	39	0.0190179
2	0	9	40	-0.289645
2	0	9	41	0.0138762
2	0	9	42	-0.383298
2	0	9	43	0.00576416
2	0	9	44	0.0317271
2	0	9	45	0.0188038
2	0	9	46	-0.32916
2	0	9	47	-0.218487
2	0	9	48	0.170596
2	0	9	49	0.00834699
2	0	9	50	-0.140495
2	0	9	51	-0.295463
2	0	9	52	0.595169
2	0	9	53	-0.239918
2	0	9	54	-0.403831
2	0	9	55	-0.198313
2	0	9	56	0.0349449
2	0	9	57	0.0379296
2	0	9	58	-0.315648
2	0	9	59	-0.271822
2	0	9	60	0.124693
2	0	9	61	-0.203116
2	0	9	62	0.0284321
2	0	9	63	-0.18917
2	0	9	64	0.0278297
2	0	9	65	0.00703824
2	0	9	66	0.00610682
2	0	9	67	0.000433739
2	0	9	68	-0.262726
2	0	9	69	0.000418842
2	0	9	70	0.0149408
2	0	9	71	0.0210224
2	0	9	72	-0.313956
2	0	9	73	0.497787
2	0	9	74	-0.263215
2	0	9	75	0.00615005
2	0	9	76	-0.240686
2	0	9	77	0.0351502
2	0	9	78	0.0235255
2	0	9	79	-0.271835
2	0	9	80	-0.493856
2	1	9	1	0.13607
2	1	9	2	-0.188315
2	1	9	3	0.165476
2	1	9	4	0.287863
2	1	9	5	0.0182638
2	1	9	6	0.229687
2	1	9	7	0.00286574
2	1	9	8	0.00432402
2	1	9	9	0.0433434
2	1	9	10	8.1365e-05
2	1	9	11	0.000274677
2	1	9	12	0.0477049
2	1	9	13	0.143482
2	1	9	14	0.227195
2	1	9	15	0.0183599
2	1	9	16	0.0263202
2	1	9	17	0.0314574
2	1	9	18	0.239427
2	1	9	19	-0.198782
2	1	9	20	0.315949
2	1	9	21	0.0247296
2	1	9	22	0.0380424
2	1	9	23	0.0157135
2	1	9	24	0.243858
2	1	9	25	0.169489
2	1	9	26	0.0618116
2	1	9	27	0.146644
2	1	9	28	0.177194
2	1	9	29	0.00800781
2	1	9	30	0.0233857
2	1	9	31	0.0214945
2	1	9	32	0.179724
2	1	9	33	0.0634554
2	1	9	34	0.0349522
2	1	9	35	0.0316842
2	1	9	36	0.0135026
2	1	9	37	0.0280239
2	1	9	38	0.054368
2	1	9	39	-0.575123
2	1	9	40	0.035341
2	1	9	41	-0.511062
2	1	9	42	0.0169038
2	1	9	43	0.00552675
2	1	9	44	0.0199675
2	1	9	45	0.0215727
2	1	9	46	0.0316176
2	1	9	47	-0.435964
2	1	9	48	0.162958
2	1	9	49	0.110755
2	1	9	50	0.00977778
2	1	9	51	0.0404624
2	1	9	52	0.0173359
2	1	9	53	0.0900846
2	1	9	54	0.0275375
2	1	9	55	0.0172374
2	1	9	56	0.0216481
2	1	9	57	0.228609
2	1	9	58	0.0261044
2	1	9	59	0.141687
2	1	9	60	0.0131114
2	1	9	61	0.0391896
2	1	9	62	0.0172013
2	1	9	63	0.0377119
2	1	9	64	0.0308315
2	1	9	65	0.170047
2	1	9	66	0.00377909
2	1	9	67	0.0159295
2	1	9	68	0.044371
2	1	9	69	0.0389485
2	1	9	70	0.00657169
2	1	9	71	0.0401606
2	1	9	72	0.0553377
2	1	9	73	0.00736052
2	1	9	74	0.0260954
2	1	9	75	0.324392
2	1	9	76	0.188539
2	1	9	77	0.0223072
2	1	9	78	0.0107782
2	1	9	79	0.303633
2	1	9	80	0.0265866
2	0	10	1	-0.246475
2	0	10	2	-0.278168
2	0	10	3	0.189264
2	0	10	4	0.316835
2	0	10	5	0.00506901
2	0	10	6	0.0422501
2	0	10	7	-0.267789
2	0	10	8	-0.0741839
2	0	10	9	7.8108e-06
2	0	10	10	0.0403006
2	0	10	11	0.0711817
2	0	10	12	0.00349769
2	0	10	13	-0.0880421
2	0	10	14	0.00208785
2	0	10	15	-0.11133
2	0	10	16	0.168421
2	0	10	17	0.0789422
2	0	10	18	0.00447593
2	0	10	19	0.0347039
2	0	10	20	0.330838
2	0	10	21	0.0172574
2	0	10	22	0.00432597
2	0	10	23	0.159958
2	0	10	24	0.0652484
2	0	10	25	0.0568927
2	0	10	26	0.0147009
2	0	10	27	0.0065652
2	0	10	28	0.0174967
2	0	10	29	0.00658109
2	0	10	30	-0.181592
2	0	10	31	0.0052687
2	0	10	32	0.0306506
2	0	10	33	0.512012
2	0	10	34	0.0615149
2	0	10	35	0.0420671
2	0	10	36	-0.0567124
2	0	10	37	-0.178012
2	0	10	38	0.033913
2	0	10	39	0.00299845
2	0	10	40	0.0676104
2	0	10	41	0.0693249
2	0	10	42	0.048716
2	0	10	43	0.0256866
2	0	10	44	0.00934146
2	0	10	45	0.24688
2	0	10	46	0.0209292
2	0	10	47	0.0051612
2	0	10	48	0.01978
2	0	10	49	0.0214916
2	0	10	50	0.00581648
2	0	10	51	0.0139762
2	0	10	52	0.0063226
2	0	10	53	0.0349191
2	0	10	54	0.0689671
2	0	10	55	0.0100548
2	0	10	56	-0.395822
2	0	10	57	0.141782
2	0	10	58	0.0154139
2	0	10	59	0.350978
2	0	10	60	0.0460249
2	0	10	61	0.0352574
2	0	10	62	-0.943488
2	0	10	63	0.00532383
2	0	10	64	0.125773
2	0	10	65	0.0363814
2	0	10	66	0.224305
2	0	10	67	0.0673805
2	0	10	68	-0.471585
2	0	10	69	0.0626881
2	0	10	70	0.633956
2	0	10	71	0.445716
2	0	10	72	0.0537999
2	0	10	73	0.0736319
2	0	10	74	0.0356918
2	0	10	75	0.0516083
2	0	10	76	0.33353
2	0	10	77	0.0418374
2	0	10	78	0.0259684
2	0	10	79	0.0406202
2	0	10	80	-0.579255
2	1	10	1	0.204881
2	1	10	2	0.22837
2	1	10	3	0.18309
2	1	10	4	0.342015
2	1	10	5	0.178651
2	1	10	6	0.0220105
2	1	10	7	0.0379182
2	1	10	8	0.240469
2	1	10	9	0.215798
2	1	10	10	0.297618
2	1	10	11	0.13526
2	1	10	12	0.356962
2	1	10	13	0.11437
2	1	10	14	0.248966
2	1	10	15	0.0610209
2	1	10	16	0.172427
2	1	10	17	0.0487839
2	1	10	18	0.0565522
2	1	10	19	-0.202446
2	1	10	20	0.414007
2	1	10	21	0.0276976
2	1	10	22	0.0707065
2	1	10	23	0.245088
2	1	10	24	0.0356608
2	1	10	25	0.0380889
2	1	10	26	0.0563293
2	1	10	27	0.194764
2	1	10	28	0.223015
2	1	10	29	0.0116623
2	1	10	30	0.219418
2	1	10	31	0.0367493
2	1	10	32	0.0424126
2	1	10	33	0.0204095
2	1	10	34	0.0193665
2	1	10	35	0.0822111
2	1	10	36	0.016736
2	1	10	37	0.0763654
2	1	10	38	0.0117436
2	1	10	39	0.284332
2	1	10	40	0.16085
2	1	10	41	0.0460741
2	1	10	42	0.197921
2	1	10	43	0.018232
2	1	10	44	0.0566839
2	1	10	45	0.22712
2	1	10	46	0.0275341
2	1	10	47	0.0549519
2	1	10	48	0.0894917
2	1	10	49	0.177251
2	1	10	50	0.340637
2	1	10	51	0.0895108
2	1	10	52	0.0622048
2	1	10	53	0.179882
2	1	10	54	0.0261818
2	1	10	55	0.160234
2	1	10	56	0.258114
2	1	10	57	0.0482173
2	1	10	58	0.043647
2	1	10	59	0.048965
2	1	10	60	0.0413845
2	1	10	61	0.177245
2	1	10	62	0.0606618
2	1	10	63	NaN
2	1	10	64	0.0257103
2	1	10	65	NaN
2	1	10	66	0.580441
2	1	10	67	0.0345138
2	1	10	68	0.0214174
2	1	10	69	0.0921007
2	1	10	70	0.0465948
2	1	10	71	0.0674003
2	1	10	72	0.0423867
2	1	10	73	0.0300263
2	1	10	74	0.510658
2	1	10	75	0.0306966
2	1	10	76	0.409738
2	1	10	77	0.908769
2	1	10	78	-0.424685
2	1	10	79	0.0210098
2	1	10	80	0.0181682
2	0	11	1	-0.123573
2	0	11	2	0.020521
2	0	11	3	0.129033
2	0	11	4	-0.149226
2	0	11	5	-0.19708
2	0	11	6	0.0199671
2	0	11	7	0.0503309
2	0	11	8	0.115111
2	0	11	9	0.0047538
2	0	11	10	0.00436662
2	0	11	11	0.0143786
2	0	11	12	0.0108637
2	0	11	13	0.0410665
2	0	11	14	0.0187329
2	0	11	15	0.663419
2	0	11	16	0.000674467
2	0	11	17	0.729126
2	0	11	18	0.165823
2	0	11	19	0.060803
2	0	11	20	0.0623457
2	0	11	21	0.0751907
2	0	11	22	-0.135816
2	0	11	23	-0.23646
2	0	11	24	0.00304554
2	0	11	25	0.00437189
2	0	11	26	0.0754423
2	0	11	27	0.0272661
2	0	11	28	0.0166206
2	0	11	29	0.00539807
2	0	11	30	0.0235792
2	0	11	31	0.140347
2	0	11	32	0.197981
2	0	11	33	0.0567626
2	0	11	34	0.0143355
2	0	11	35	0.00980508
2	0	11	36	0.0169028
2	0	11	37	0.0190159
2	0	11	38	0.0244298
2	0	11	39	0.031577
2	0	11	40	0.0200903
2	0	11	41	0.162217
2	0	11	42	0.154574
2	0	11	43	0.0257581
2	0	11	44	0.0183359
2	0	11	45	0.0175021
2	0	11	46	0.00260816
2	0	11	47	0.492634
2	0	11	48	0.188977
2	0	11	49	0.0305913
2	0	11	50	0.0262712
2	0	11	51	0.0133427
2	0	11	52	0.00228131
2	0	11	53	0.00779566
2	0	11	54	0.0263062
2	0	11	55	0.013048
2	0	11	56	0.03929
2	0	11	57	0.0261402
2	0	11	58	0.0149934
2	0	11	59	0.0197468
2	0	11	60	0.00904125
2	0	11	61	0.00991801
2	0	11	62	0.0154796
2	0	11	63	0.0324763
2	0	11	64	0.00997754
2	0	11	65	-0.461153
2	0	11	66	NaN
2	0	11	67	0.0333905
2	0	11	68	0.0117131
2	0	11	69	0.0809567
2	0	11	70	0.0102751
2	0	11	71	0.0642988
2	0	11	72	0.0181296
2	0	11	73	0.0267883
2	0	11	74	0.0034153
2	0	11	75	0.0239917
2	0	11	76	0.0405535
2	0	11	77	0.17245
2	0	11	78	0.0720741
2	0	11	79	0.0242859
2	0	11	80	0.0120436
2	1	11	1	0.00789649
2	1	11	2	0.0196758
2	1	11	3	0.101238
2	1	11	4	0.0246801
2	1	11	5	0.1281
2	1	11	6	0.0366349
2	1	11	7	0.156479
2	1	11	8	0.00906508
2	1	11	9	0.121339
2	1	11	10	0.191305
2	1	11	11	0.0551409
2	1	11	12	0.103052
2	1	11	13	0.16403
2	1	11	14	NaN
2	1	11	15	0.0624822
2	1	11	16	0.275112
2	1	11	17	0.01563
2	1	11	18	0.0290642
2	1	11	19	0.0303015
2	1	11	20	0.0191996
2	1	11	21	0.213988
2	1	11	22	0.200547
2	1	11	23	0.31946
2	1	11	24	0.0365132
2	1	11	25	0.187903
2	1	11	26	0.0522407
2	1	11	27	0.0363274
2	1	11	28	0.0388609
2	1	11	29	0.0835906
2	1	11	30	-0.924955
2	1	11	31	0.151718
2	1	11	32	0.0626831
2	1	11	33	0.948665
2	1	11	34	0.00499625
2	1	11	35	0.0530315
2	1	11	36	0.0171713
2	1	11	37	0.0418898
2	1	11	38	0.00646355
2	1	11	39	0.0918825
2	1	11	40	0.0213949
2	1	11	41	0.026475
2	1	11	42	0.158527
2	1	11	43	0.0460301
2	1	11	44	0.136324
2	1	11	45	0.0159188
2	1	11	46	0.197201
2	1	11	47	0.0828462
2	1	11	48	0.0602708
2	1	11	49	0.0332767
2	1	11	50	0.0487583
2	1	11	51	0.0169393
2	1	11	52	0.0524506
2	1	11	53	0.0513541
2	1	11	54	0.0636367
2	1	11	55	0.0384071
2	1	11	56	-0.631511
2	1	11	57	0.0613881
2	1	11	58	0.0390003
2	1	11	59	0.02255
2	1	11	60	0.0368081
2	1	11	61	0.030614
2	1	11	62	0.040637
2	1	11	63	0.0449678
2	1	11	64	0.0649497
2	1	11	65	0.0332527
2	1	11	66	0.0309808
2	1	11	67	0.0554199
2	1	11	68	0.0418826
2	1	11	69	0.0521016
2	1	11	70	0.0234757
2	1	11	71	0.00665412
2	1	11	72	0.0524616
2	1	11	73	0.0284928
2	1	11	74	0.0713426
2	1	11	75	0.087372
2	1	11	76	0.0452261
2	1	11	77	0.0354092
2	1	11	78	0.0494589
2	1	11	79	0.0349614
2	1	11	80	0.0324016
2	0	12	1	0.075268
2	0	12	2	0.0559316
2	0	12	3	0.0126798
2	0	12	4	0.032038
2	0	12	5	0.143134
2	0	12	6	0.00236227
2	0	12	7	0.0720181
2	0	12	8	-0.277611
2	0	12	9	0.20997
2	0	12	10	0.0887893
2	0	12	11	-0.0581574
2	0	12	12	0.0225849
2	0	12	13	0.127678
2	0	12	14	0.129304
2	0	12	15	0.237028
2	0	12	16	0.255533
2	0	12	17	0.00551747
2	0	12	18	-0.179905
2	0	12	19	0.00309568
2	0	12	20	0.00138794
2	0	12	21	0.304492
2	0	12	22	-0.180727
2	0	12	23	0.216704
2	0	12	24	0.00152898
2	0	12	25	0.13974
2	0	12	26	-0.243832
2	0	12	27	0.00322494
2	0	12	28	0.471069
2	0	12	29	0.108673
2	0	12	30	0.139038
2	0	12	31	0.00761336
2	0	12	32	0.180169
2	0	12	33	0.358091
2	0	12	34	0.107231
2	0	12	35	0.00557815
2	0	12	36	0.0191425
2	0	12	37	NaN
2	0	12	38	0.00592768
2	0	12	39	0.00467192
2	0	12	40	-0.110087
2	0	12	41	0.0101733
2	0	12	42	0.0864208
2	0	12	43	0.28138
2	0	12	44	0.01206
2	0	12	45	-0.349448
2	0	12	46	0.195299
2	0	12	47	0.0296498
2	0	12	48	0.164676
2	0	12	49	0.566434
2	0	12	50	0.0175578
2	0	12	51	0.0376918
2	0	12	52	0.0357367
2	0	12	53	0.0268516
2	0	12	54	0.0415101
2	0	12	55	0.020427
2	0	12	56	0.0202174
2	0	12	57	0.0345003
2	0	12	58	0.0212133
2	0	12	59	0.01973
2	0	12	60	0.0102861
2	0	12	61	0.00296052
2	0	12	62	0.0426715
2	0	12	63	0.0122691
2	0	12	64	0.00189654
2	0	12	65	0.0168489
2	0	12	66	0.024344
2	0	12	67	0.0241596
2	0	12	68	0.0100855
2	0	12	69	0.0257825
2	0	12	70	0.0059776
2	0	12	71	0.0100477
2	0	12	72	-0.47303
2	0	12	73	0.00655181
2	0	12	74	0.0112228
2	0	12	75	0.00755771
2	0	12	76	NaN
2	0	12	77	0.243298
2	0	12	78	-0.25737
2	0	12	79	-0.0598155
2	0	12	80	0.0211451
2	1	12	1	0.0357737
2	1	12	2	0.00836876
2	1	12	3	0.0800545
2	1	12	4	0.203559
2	1	12	5	0.0944931
2	1	12	6	0.00436483
2	1	12	7	0.0342325
2	1	12	8	0.101216
2	1	12	9	0.00703816
2	1	12	10	-0.114952
2	1	12	11	0.150226
2	1	12	12	0.323357
2	1	12	13	0.0334127
2	1	12	14	0.0307688
2	1	12	15	0.767872
2	1	12	16	0.116097
2	1	12	17	0.0240637
2	1	12	18	0.0249751
2	1	12	19	0.0326164
2	1	12	20	0.0215587
2	1	12	21	0.0236286
2	1	12	22	0.219491
2	1	12	23	0.0104174
2	1	12	24	0.154054
2	1	12	25	0.0128375
2	1	12	26	0.00882024
2	1	12	27	0.164556
2	1	12	28	0.0228735
2	1	12	29	0.0192574
2	1	12	30	0.0247126
2	1	12	31	0.0231375
2	1	12	32	0.0244134
2	1	12	33	-0.0654981
2	1	12	34	0.0481519
2	1	12	35	0.00130975
2	1	12	36	0.148742
2	1	12	37	0.0183594
2	1	12	38	0.163268
2	1	12	39	0.0350687
2	1	12	40	0.100398
2	1	12	41	0.326332
2	1	12	42	0.0339252
2	1	12	43	0.0478621
2	1	12	44	0.0223129
2	1	12	45	0.0234534
2	1	12	46	0.0393184
2	1	12	47	0.264129
2	1	12	48	0.0290717
2	1	12	49	0.0326645
2	1	12	50	0.0408197
2	1	12	51	0.0295283
2	1	12	52	0.0142561
2	1	12	53	0.0250978
2	1	12	54	0.0257591
2	1	12	55	0.180048
2	1	12	56	0.213069
2	1	12	57	0.0258958
2	1	12	58	0.0278549
2	1	12	59	0.00949179
2	1	12	60	0.404244
2	1	12	61	0.0406017
2	1	12	62	0.178926
2	1	12	63	0.0949806
2	1	12	64	0.388471
2	1	12	65	0.226412
2	1	12	66	0.451969
2	1	12	67	0.126692
2	1	12	68	0.217387
2	1	12	69	0.0351719
2	1	12	70	0.0452225
2	1	12	71	0.0231119
2	1	12	72	0.0204399
2	1	12	73	0.00618959
2	1	12	74	0.198501
2	1	12	75	0.0365941
2	1	12	76	0.0282678
2	1	12	77	0.0318358
2	1	12	78	0.0106925
2	1	12	79	0.0192739
2	1	12	80	0.0239249
2	0	13	1	0.19215
2	0	13	2	0.0552301
2	0	13	3	-0.172894
2	0	13	4	0.438248
2	0	13	5	0.0749324
2	0	13	6	-0.166924
2	0	13	7	0.490707
2	0	13	8	0.161059
2	0	13	9	0.379943
2	0	13	10	0.249944
2	0	13	11	0.258969
2	0	13	12	0.135958
2	0	13	13	NaN
2	0	13	14	0.286522
2	0	13	15	0.00804434
2	0	13	16	0.13737
2	0	13	17	0.418048
2	0	13	18	0.0371322
2	0	13	19	0.0162217
2	0	13	20	-0.231183
2	0	13	21	0.0287381
2	0	13	22	0.0573685
2	0	13	23	0.102392
2	0	13	24	0.116056
2	0	13	25	0.239197
2	0	13	26	0.171997
2	0	13	27	0.226475
2	0	13	28	0.257964
2	0	13	29	0.380409
2	0	13	30	0.0634081
2	0	13	31	0.0391438
2	0	13	32	0.265536
2	0	13	33	0.423194
2	0	13	34	0.325602
2	0	13	35	0.507667
2	0	13	36	0.383379
2	0	13	37	0.049261
2	0	13	38	0.0314969
2	0	13	39	0.331077
2	0	13	40	0.0653658
2	0	13	41	0.484202
2	0	13	42	0.424927
2	0	13	43	NaN
2	0	13	44	0.253376
2	0	13	45	NaN
2	0	13	46	0.157437
2	0	13	47	0.257367
2	0	13	48	0.798814
2	0	13	49	0.0397741
2	0	13	50	NaN
2	0	13	51	0.0681254
2	0	13	52	0.283818
2	0	13	53	0.0489711
2	0	13	54	0.889406
2	0	13	55	0.0152347
2	0	13	56	0.133469
2	0	13	57	0.24503
2	0	13	58	0.0821225
2	0	13	59	0.127989
2	0	13	60	-0.204358
2	0	13	61	0.0621414
2	0	13	62	0.025681
2	0	13	63	0.0668662
2	0	13	64	0.0131022
2	0	13	65	0.0688429
2	0	13	66	0.2135
2	0	13	67	-0.186567
2	0	13	68	0.044723
2	0	13	69	0.175134
2	0	13	70	0.877458
2	0	13	71	0.110545
2	0	13	72	0.0382789
2	0	13	73	0.0703393
2	0	13	74	0.27161
2	0	13	75	0.0461545
2	0	13	76	0.00806568
2	0	13	77	0.0689922
2	0	13	78	NaN
2	0	13	79	0.026623
2	0	13	80	0.0233316
2	1	13	1	0.0520537
2	1	13	2	0.0224562
2	1	13	3	0.0229757
2	1	13	4	-0.304513
2	1	13	5	0.0321904
2	1	13	6	0.0663871
2	1	13	7	0.0219439
2	1	13	8	0.0247446
2	1	13	9	0.0610227
2	1	13	10	0.017066
2	1	13	11	0.342333
2	1	13	12	0.0438809
2	1	13	13	0.872404
2	1	13	14	0.081287
2	1	13	15	0.00521046
2	1	13	16	-0.372027
2	1	13	17	0.0369418
2	1	13	18	0.160246
2	1	13	19	0.0455692
2	1	13	20	0.557586
2	1	13	21	0.25704
2	1	13	22	0.0296345
2	1	13	23	0.00940855
2	1	13	24	0.0445726
2	1	13	25	0.0296152
2	1	13	26	0.00730402
2	1	13	27	0.989954
2	1	13	28	0.00951264
2	1	13	29	0.0667287
2	1	13	30	0.0545794
2	1	13	31	0.0406752
2	1	13	32	0.0336714
2	1	13	33	0.0353695
2	1	13	34	0.0348422
2	1	13	35	0.0310763
2	1	13	36	0.0256142
2	1	13	37	0.00670897
2	1	13	38	0.0577091
2	1	13	39	0.0410085
2	1	13	40	0.0598205
2	1	13	41	0.0312666
2	1	13	42	0.0372935
2	1	13	43	0.0317784
2	1	13	44	0.0360268
2	1	13	45	0.117541
2	1	13	46	0.0316461
2	1	13	47	0.0109746
2	1	13	48	0.272028
2	1	13	49	0.0283864
2	1	13	50	0.223665
2	1	13	51	0.0191571
2	1	13	52	NaN
2	1	13	53	0.0434881
2	1	13	54	0.0121642
2	1	13	55	0.0313731
2	1	13	56	0.829253
2	1	13	57	0.0469172
2	1	13	58	0.0323015
2	1	13	59	0.0568437
2	1	13	60	0.0642677
2	1	13	61	0.0266591
2	1	13	62	0.0185038
2	1	13	63	0.0139333
2	1	13	64	0.018903
2	1	13	65	NaN
2	1	13	66	0.0119826
2	1	13	67	0.0266843
2	1	13	68	0.015573
2	1	13	69	0.0426038
2	1	13	70	0.0351424
2	1	13	71	0.0187685
2	1	13	72	0.710974
2	1	13	73	0.0196183
2	1	13	74	0.0376756
2	1	13	75	NaN
2	1	13	76	0.60511
2	1	13	77	0.0412007
2	1	13	78	NaN
2	1	13	79	NaN
2	1	13	80	NaN
2	0	14	1	0.00898553
2	0	14	2	-0.424874
2	0	14	3	0.00446492
2	0	14	4	-0.249125
2	0	14	5	0.0884861
2	0	14	6	0.0266485
2	0	14	7	-0.183366
2	0	14	8	0.0476365
2	0	14	9	0.0104699
2	0	14	10	0.0120523
2	0	14	11	-0.150933
2	0	14	12	0.0262041
2	0	14	13	0.0158249
2	0	14	14	0.189767
2	0	14	15	0.0592392
2	0	14	16	0.0267062
2	0	14	17	0.138547
2	0	14	18	0.0316981
2	0	14	19	0.00262399
2	0	14	20	0.00712375
2	0	14	21	0.0759736
2	0	14	22	0.00945316
2	0	14	23	0.0335007
2	0	14	24	0.0244551
2	0	14	25	0.231267
2	0	14	26	0.00689137
2	0	14	27	0.00197189
2	0	14	28	0.199415
2	0	14	29	0.0253305
2	0	14	30	0.193973
2	0	14	31	-0.180946
2	0	14	32	0.0517402
2	0	14	33	-0.219061
2	0	14	34	0.00796618
2	0	14	35	0.0300375
2	0	14	36	0.0292964
2	0	14	37	0.306005
2	0	14	38	0.0179877
2	0	14	39	0.0408336
2	0	14	40	0.00548012
2	0	14	41	0.0192387
2	0	14	42	0.26571
2	0	14	43	0.00205678
2	0	14	44	0.0532585
2	0	14	45	0.0534689
2	0	14	46	0.0634131
2	0	14	47	0.0588934
2	0	14	48	0.0410768
2	0	14	49	0.060563
2	0	14	50	0.0154108
2	0	14	51	0.139553
2	0	14	52	0.0537183
2	0	14	53	0.0327024
2	0	14	54	-0.246749
2	0	14	55	0.0626158
2	0	14	56	0.00721936
2	0	14	57	0.000513807
2	0	14	58	0.0129984
2	0	14	59	-0.401349
2	0	14	60	0.0368232
2	0	14	61	0.0302627
2	0	14	62	0.0177615
2	0	14	63	0.857753
2	0	14	64	0.37205
2	0	14	65	-0.592958
2	0	14	66	0.239102
2	0	14	67	0.0156693
2	0	14	68	0.0472224
2	0	14	69	0.0468789
2	0	14	70	0.0446913
2	0	14	71	0.00427359
2	0	14	72	0.264918
2	0	14	73	0.0395665
2	0	14	74	0.0408603
2	0	14	75	0.0463431
2	0	14	76	0.64573
2	0	14	77	0.0383686
2	0	14	78	0.00514092
2	0	14	79	0.0544271
2	0	14	80	0.0091814
2	1	14	1	0.161071
2	1	14	2	0.188314
2	1	14	3	0.176402
2	1	14	4	0.111574
2	1	14	5	0.171704
2	1	14	6	0.0188553
2	1	14	7	0.201088
2	1	14	8	0.0246745
2	1	14	9	0.18456
2	1	14	10	0.198518
2	1	14	11	0.0921712
2	1	14	12	0.159523
2	1	14	13	0.0167561
2	1	14	14	0.0215787
2	1	14	15	0.0389305
2	1	14	16	0.00280244
2	1	14	17	0.0595979
2	1	14	18	0.150865
2	1	14	19	0.030226
2	1	14	20	0.0647563
2	1	14	21	0.149042
2	1	14	22	0.119823
2	1	14	23	0.0541269
2	1	14	24	-0.355647
2	1	14	25	0.0172927
2	1	14	26	0.0560263
2	1	14	27	0.0805074
2	1	14	28	0.0255126
2	1	14	29	0.495277
2	1	14	30	0.0398362
2	1	14	31	-0.101332
2	1	14	32	0.216752
2	1	14	33	0.0324189
2	1	14	34	0.347745
2	1	14	35	0.816917
2	1	14	36	0.209119
2	1	14	37	0.247087
2	1	14	38	0.430993
2	1	14	39	0.0390315
2	1	14	40	0.225704
2	1	14	41	0.580019
2	1	14	42	0.0552781
2	1	14	43	0.107212
2	1	14	44	0.038417
2	1	14	45	0.0358863
2	1	14	46	0.0374681
2	1	14	47	0.833251
2	1	14	48	0.0291872
2	1	14	49	-0.360964
2	1	14	50	0.041656
2	1	14	51	0.183802
2	1	14	52	0.0891355
2	1	14	53	0.141805
2	1	14	54	0.017027
2	1	14	55	0.0368874
2	1	14	56	0.109779
2	1	14	57	0.00292636
2	1	14	58	0.0445168
2	1	14	59	0.142443
2	1	14	60	0.703313
2	1	14	61	0.0263329
2	1	14	62	0.134381
2	1	14	63	0.152598
2	1	14	64	0.13238
2	1	14	65	0.0157836
2	1	14	66	0.778672
2	1	14	67	0.0496525
2	1	14	68	0.752285
2	1	14	69	0.112678
2	1	14	70	0.0332921
2	1	14	71	0.0386752
2	1	14	72	0.0259218
2	1	14	73	0.386407
2	1	14	74	0.0580997
2	1	14	75	0.489371
2	1	14	76	0.0279905
2	1	14	77	0.210995
2	1	14	78	0.0868722
2	1	14	79	0.0531484
2	1	14	80	0.0148947
2	0	15	1	-0.0894924
2	0	15	2	0.116163
2	0	15	3	-0.167218
2	0	15	4	0.202476
2	0	15	5	0.0372944
2	0	15	6	-0.113043
2	0	15	7	0.0017056
2	0	15	8	-0.196257
2	0	15	9	0.00716235
2	0	15	10	0.124799
2	0	15	11	-0.0725276
2	0	15	12	-0.0980085
2	0	15	13	NaN
2	0	15	14	0.173637
2	0	15	15	-0.145356
2	0	15	16	-0.19786
2	0	15	17	-0.263699
2	0	15	18	0.87882
2	0	15	19	0.0908528
2	0	15	20	0.0178441
2	0	15	21	-0.412968
2	0	15	22	0.683461
2	0	15	23	0.0355952
2	0	15	24	0.014394
2	0	15	25	-0.141045
2	0	15	26	0.0276598
2	0	15	27	-0.18249
2	0	15	28	-0.149245
2	0	15	29	-0.158786
2	0	15	30	NaN
2	0	15	31	-0.139471
2	0	15	32	0.346984
2	0	15	33	0.0171987
2	0	15	34	-0.165015
2	0	15	35	0.100785
2	0	15	36	-0.168167
2	0	15	37	0.00987417
2	0	15	38	0.379523
2	0	15	39	-0.172056
2	0	15	40	0.0563507
2	0	15	41	0.031466
2	0	15	42	-0.360611
2	0	15	43	-0.177822
2	0	15	44	0.0357259
2	0	15	45	0.148107
2	0	15	46	0.351814
2	0	15	47	0.728762
2	0	15	48	0.413717
2	0	15	49	0.0226104
2	0	15	50	0.00842356
2	0	15	51	0.0188681
2	0	15	52	0.00387237
2	0	15	53	0.446419
2	0	15	54	0.0554659
2	0	15	55	0.0774218
2	0	15	56	0.0346915
2	0	15	57	0.0279787
2	0	15	58	0.0152824
2	0	15	59	0.00496055
2	0	15	60	0.409642
2	0	15	61	0.0058087
2	0	15	62	-0.209525
2	0	15	63	0.107256
2	0	15	64	-0.228809
2	0	15	65	0.076094
2	0	15	66	0.0199329
2	0	15	67	0.0113057
2	0	15	68	0.0935594
2	0	15	69	NaN
2	0	15	70	0.28674
2	0	15	71	0.062436
2	0	15	72	0.0400805
2	0	15	73	0.0115036
2	0	15	74	0.0348824
2	0	15	75	0.395409
2	0	15	76	0.0912359
2	0	15	77	0.413819
2	0	15	78	0.021036
2	0	15	79	NaN
2	0	15	80	NaN
2	1	15	1	0.0028185
2	1	15	2	0.128785
2	1	15	3	0.133819
2	1	15	4	0.0562266
2	1	15	5	0.0115771
2	1	15	6	0.00991437
2	1	15	7	0.286895
2	1	15	8	-0.0610403
2	1	15	9	0.0123626
2	1	15	10	0.00161673
2	1	15	11	0.227227
2	1	15	12	0.216897
2	1	15	13	0.326596
2	1	15	14	0.189615
2	1	15	15	-0.510401
2	1	15	16	0.157002
2	1	15	17	0.0483843
2	1	15	18	0.0264893
2	1	15	19	0.014009
2	1	15	20	0.251349
2	1	15	21	0.030627
2	1	15	22	0.0241295
2	1	15	23	0.0351519
2	1	15	24	0.146418
2	1	15	25	0.080185
2	1	15	26	0.205105
2	1	15	27	0.00773155
2	1	15	28	0.0159127
2	1	15	29	0.123408
2	1	15	30	0.0240092
2	1	15	31	0.203238
2	1	15	32	0.0453688
2	1	15	33	0.0472998
2	1	15	34	0.0340055
2	1	15	35	0.359621
2	1	15	36	0.0710913
2	1	15	37	0.361302
2	1	15	38	0.0173132
2	1	15	39	0.114029
2	1	15	40	0.222063
2	1	15	41	0.0109308
2	1	15	42	0.989337
2	1	15	43	0.133659
2	1	15	44	0.153587
2	1	15	45	0.037535
2	1	15	46	0.037847
2	1	15	47	0.485306
2	1	15	48	0.0247544
2	1	15	49	0.397713
2	1	15	50	-0.323227
2	1	15	51	0.17188
2	1	15	52	0.0214859
2	1	15	53	0.0270548
2	1	15	54	0.0474381
2	1	15	55	0.0386293
2	1	15	56	0.0302034
2	1	15	57	0.0474976
2	1	15	58	0.596286
2	1	15	59	0.301224
2	1	15	60	0.0307335
2	1	15	61	0.389718
2	1	15	62	0.034331
2	1	15	63	0.0328466
2	1	15	64	0.0053514
2	1	15	65	0.023209
2	1	15	66	0.0355798
2	1	15	67	NaN
2	1	15	68	NaN
2	1	15	69	NaN
2	1	15	70	NaN
2	1	15	71	0.404367
2	1	15	72	0.0227894
2	1	15	73	0.0212916
2	1	15	74	0.0251107
2	1	15	75	0.0379964
2	1	15	76	0.0332671
2	1	15	77	0.0150517
2	1	15	78	0.250467
2	1	15	79	0.0253455
2	1	15	80	0.0256067
2	0	16	1	0.000931869
2	0	16	2	0.00957897
2	0	16	3	0.000652286
2	0	16	4	0.00190489
2	0	16	5	0.00383795
2	0	16	6	-0.22594
2	0	16	7	0.00492004
2	0	16	8	0.0141478
2	0	16	9	0.0315013
2	0	16	10	-0.335447
2	0	16	11	0.00361062
2	0	16	12	0.0145596
2	0	16	13	0.000683566
2	0	16	14	0.0274229
2	0	16	15	-0.178349
2	0	16	16	-0.383316
2	0	16	17	0.00252795
2	0	16	18	0.0026312
2	0	16	19	0.0312168
2	0	16	20	0.0278378
2	0	16	21	0.0276171
2	0	16	22	0.0364282
2	0	16	23	0.0610455
2	0	16	24	0.00558059
2	0	16	25	0.116996
2	0	16	26	0.0115429
2	0	16	27	0.00570891
2	0	16	28	0.00213688
2	0	16	29	0.0133295
2	0	16	30	0.0251375
2	0	16	31	0.034161
2	0	16	32	0.25363
2	0	16	33	0.023491
2	0	16	34	0.00633389
2	0	16	35	0.145271
2	0	16	36	-0.319664
2	0	16	37	0.0259382
2	0	16	38	0.131652
2	0	16	39	0.0101117
2	0	16	40	0.0141518
2	0	16	41	0.0218496
2	0	16	42	0.013827
2	0	16	43	-0.29997
2	0	16	44	0.021718
2	0	16	45	0.00682076
2	0	16	46	-0.324448
2	0	16	47	0.859164
2	0	16	48	0.39346
2	0	16	49	0.0570841
2	0	16	50	-0.479711
2	0	16	51	0.0240918
2	0	16	52	0.00192035
2	0	16	53	0.109412
2	0	16	54	0.239573
2	0	16	55	0.0032671
2	0	16	56	0.0187652
2	0	16	57	0.873257
2	0	16	58	0.0188145
2	0	16	59	0.0395522
2	0	16	60	0.0191257
2	0	16	61	0.000650629
2	0	16	62	0.352685
2	0	16	63	-0.310018
2	0	16	64	0.192279
2	0	16	65	NaN
2	0	16	66	0.0258422
2	0	16	67	NaN
2	0	16	68	0.00266171
2	0	16	69	0.0801135
2	0	16	70	0.0200656
2	0	16	71	0.00381968
2	0	16	72	0.362532
2	0	16	73	-0.314133
2	0	16	74	NaN
2	0	16	75	0.474241
2	0	16	76	0.0882222
2	0	16	77	0.0667418
2	0	16	78	0.104014
2	0	16	79	0.0325795
2	0	16	80	0.00686027
2	1	16	1	0.119027
2	1	16	2	0.161494
2	1	16	3	0.0676793
2	1	16	4	0.091389
2	1	16	5	0.140895
2	1	16	6	0.608702
2	1	16	7	0.105724
2	1	16	8	0.0403508
2	1	16	9	0.0306203
2	1	16	10	0.162931
2	1	16	11	0.0725458
2	1	16	12	0.0846427
2	1	16	13	0.156156
2	1	16	14	0.204634
2	1	16	15	0.197097
2	1	16	16	0.00221937
2	1	16	17	0.251931
2	1	16	18	0.0835614
2	1	16	19	0.389934
2	1	16	20	0.204599
2	1	16	21	0.230914
2	1	16	22	0.204401
2	1	16	23	0.0018596
2	1	16	24	0.252907
2	1	16	25	0.0499139
2	1	16	26	0.709673
2	1	16	27	0.381782
2	1	16	28	0.0592043
2	1	16	29	0.0168452
2	1	16	30	0.0470282
2	1	16	31	0.603296
2	1	16	32	0.0310114
2	1	16	33	0.230936
2	1	16	34	0.184298
2	1	16	35	0.253661
2	1	16	36	0.0484004
2	1	16	37	0.184431
2	1	16	38	NaN
2	1	16	39	0.134943
2	1	16	40	0.0526731
2	1	16	41	0.21099
2	1	16	42	0.417811
2	1	16	43	0.218457
2	1	16	44	0.116698
2	1	16	45	0.0449768
2	1	16	46	0.0243533
2	1	16	47	-0.349887
2	1	16	48	0.156783
2	1	16	49	0.391786
2	1	16	50	0.428642
2	1	16	51	0.545708
2	1	16	52	0.0444138
2	1	16	53	0.112101
2	1	16	54	0.237283
2	1	16	55	0.0264033
2	1	16	56	0.0118564
2	1	16	57	0.0876775
2	1	16	58	0.338571
2	1	16	59	0.178765
2	1	16	60	0.223893
2	1	16	61	0.363959
2	1	16	62	0.2435
2	1	16	63	0.0923943
2	1	16	64	0.12732
2	1	16	65	0.159228
2	1	16	66	0.0746986
2	1	16	67	0.0333136
2	1	16	68	0.0278851
2	1	16	69	-0.451969
2	1	16	70	-0.713803
2	1	16	71	0.0435886
2	1	16	72	NaN
2	1	16	73	0.0299736
2	1	16	74	0.0768063
2	1	16	75	0.0440077
2	1	16	76	0.973136
2	1	16	77	0.309508
2	1	16	78	0.0362191
2	1	16	79	0.0601408
2	1	16	80	0.053608
2	0	17	1	-0.0689833
2	0	17	2	-0.0604799
2	0	17	3	0.250798
2	0	17	4	-0.631591
2	0	17	5	-0.18403
2	0	17	6	-0.206396
2	0	17	7	-0.131153
2	0	17	8	0.00249924
2	0	17	9	-0.116177
2	0	17	10	5.06862e-06
2	0	17	11	-0.283513
2	0	17	12	-0.183441
2	0	17	13	-0.134797
2	0	17	14	0.00698982
2	0	17	15	-0.230747
2	0	17	16	-0.158531
2	0	17	17	0.0073085
2	0	17	18	-0.226899
2	0	17	19	0.139673
2	0	17	20	-0.330711
2	0	17	21	0.0198476
2	0	17	22	0.00415149
2	0	17	23	-0.0755857
2	0	17	24	0.00467742
2	0	17	25	0.105722
2	0	17	26	0.011832
2	0	17	27	0.00700186
2	0	17	28	0.00206002
2	0	17	29	0.0269217
2	0	17	30	0.261403
2	0	17	31	0.00326042
2	0	17	32	0.00959045
2	0	17	33	0.0309101
2	0	17	34	0.0187392
2	0	17	35	0.00577665
2	0	17	36	0.00623435
2	0	17	37	0.405906
2	0	17	38	0.0237036
2	0	17	39	-0.372086
2	0	17	40	0.00788262
2	0	17	41	0.00883365
2	0	17	42	0.0012332
2	0	17	43	0.0227973
2	0	17	44	-0.813471
2	0	17	45	0.0241157
2	0	17	46	0.0884631
2	0	17	47	0.0193039
2	0	17	48	-0.251425
2	0	17	49	0.0112724
2	0	17	50	0.0127291
2	0	17	51	0.30853
2	0	17	52	0.000604674
2	0	17	53	0.00576446
2	0	17	54	0.00725002
2	0	17	55	0.0205365
2	0	17	56	0.00683529
2	0	17	57	0.249016
2	0	17	58	0.0153285
2	0	17	59	0.518778
2	0	17	60	0.00201856
2	0	17	61	0.0172118
2	0	17	62	0.0380954
2	0	17	63	0.00386871
2	0	17	64	0.00968344
2	0	17	65	0.00749211
2	0	17	66	0.0384128
2	0	17	67	0.0424609
2	0	17	68	0.00920941
2	0	17	69	-0.29459
2	0	17	70	0.0326874
2	0	17	71	0.0280175
2	0	17	72	0.005496
2	0	17	73	0.232535
2	0	17	74	0.00324955
2	0	17	75	0.0416663
2	0	17	76	0.0326455
2	0	17	77	0.832339
2	0	17	78	0.00858153
2	0	17	79	0.291997
2	0	17	80	0.0258293
2	1	17	1	0.104262
2	1	17	2	0.800123
2	1	17	3	0.148934
2	1	17	4	0.0941182
2	1	17	5	0.044729
2	1	17	6	0.289078
2	1	17	7	0.28723
2	1	17	8	0.0405957
2	1	17	9	0.0190395
2	1	17	10	0.0244476
2	1	17	11	0.106828
2	1	17	12	0.168987
2	1	17	13	0.0211037
2	1	17	14	0.0996298
2	1	17	15	0.07504
2	1	17	16	0.022335
2	1	17	17	0.024576
2	1	17	18	0.0289675
2	1	17	19	0.0303627
2	1	17	20	0.0479691
2	1	17	21	0.0294485
2	1	17	22	0.150643
2	1	17	23	0.0519398
2	1	17	24	NaN
2	1	17	25	0.0385217
2	1	17	26	0.0108953
2	1	17	27	0.0575423
2	1	17	28	0.142023
2	1	17	29	0.465628
2	1	17	30	0.041443
2	1	17	31	0.029857
2	1	17	32	-0.181053
2	1	17	33	0.447691
2	1	17	34	0.0426008
2	1	17	35	0.0675384
2	1	17	36	0.00250071
2	1	17	37	0.0575616
2	1	17	38	-0.329353
2	1	17	39	0.266004
2	1	17	40	0.111847
2	1	17	41	0.155684
2	1	17	42	0.0199641
2	1	17	43	0.052543
2	1	17	44	0.213613
2	1	17	45	0.0407394
2	1	17	46	0.0204102
2	1	17	47	0.0185668
2	1	17	48	0.478608
2	1	17	49	0.0303682
2	1	17	50	0.376478
2	1	17	51	0.0286135
2	1	17	52	0.03167
2	1	17	53	0.0538618
2	1	17	54	0.0381086
2	1	17	55	-0.84017
2	1	17	56	0.0929228
2	1	17	57	0.0120165
2	1	17	58	0.167689
2	1	17	59	0.0464722
2	1	17	60	0.0162665
2	1	17	61	0.0331876
2	1	17	62	0.0316836
2	1	17	63	0.0231037
2	1	17	64	0.141865
2	1	17	65	0.0128603
2	1	17	66	0.02053
2	1	17	67	0.0181177
2	1	17	68	0.022902
2	1	17	69	0.0337427
2	1	17	70	0.044469
2	1	17	71	0.0374852
2	1	17	72	0.0304224
2	1	17	73	0.0362108
2	1	17	74	0.0423925
2	1	17	75	0.0451936
2	1	17	76	0.0342625
2	1	17	77	0.00673759
2	1	17	78	0.0327914
2	1	17	79	0.0289541
2	1	17	80	0.323025
2	0	18	1	0.000208622
2	0	18	2	0.00383513
2	0	18	3	0.044255
2	0	18	4	-0.144575
2	0	18	5	0.000319967
2	0	18	6	0.00167661
2	0	18	7	-0.097432
2	0	18	8	-0.0775699
2	0	18	9	-0.0930666
2	0	18	10	0.00918836
2	0	18	11	0.000213572
2	0	18	12	0.0569142
2	0	18	13	-0.21215
2	0	18	14	-0.0890831
2	0	18	15	0.0507101
2	0	18	16	0.118905
2	0	18	17	0.00117243
2	0	18	18	-0.0938509
2	0	18	19	0.00222636
2	0	18	20	0.103683
2	0	18	21	0.000404161
2	0	18	22	-0.562009
2	0	18	23	0.257634
2	0	18	24	0.126156
2	0	18	25	-0.489904
2	0	18	26	0.0179564
2	0	18	27	-0.151753
2	0	18	28	0.129853
2	0	18	29	0.0821905
2	0	18	30	0.0209564
2	0	18	31	NaN
2	0	18	32	0.20496
2	0	18	33	0.0274962
2	0	18	34	0.0367524
2	0	18	35	-0.257946
2	0	18	36	0.0009075
2	0	18	37	-0.220494
2	0	18	38	-0.183988
2	0	18	39	-0.2785
2	0	18	40	0.026659
2	0	18	41	-0.230595
2	0	18	42	NaN
2	0	18	43	0.0273871
2	0	18	44	0.0399709
2	0	18	45	-0.214571
2	0	18	46	-0.259101
2	0	18	47	0.00256574
2	0	18	48	-0.168639
2	0	18	49	-0.26628
2	0	18	50	0.381716
2	0	18	51	0.00228224
2	0	18	52	-0.263102
2	0	18	53	-0.175755
2	0	18	54	0.00380912
2	0	18	55	0.00817098
2	0	18	56	0.000924679
2	0	18	57	-0.239698
2	0	18	58	-0.218989
2	0	18	59	0.0628589
2	0	18	60	0.0089454
2	0	18	61	0.0496881
2	0	18	62	-0.277
2	0	18	63	0.00406998
2	0	18	64	-0.259436
2	0	18	65	-0.319225
2	0	18	66	-0.688108
2	0	18	67	-0.38635
2	0	18	68	NaN
2	0	18	69	NaN
2	0	18	70	NaN
2	0	18	71	0.376548
2	0	18	72	0.0338482
2	0	18	73	0.0370726
2	0	18	74	0.0470823
2	0	18	75	0.223298
2	0	18	76	0.509864
2	0	18	77	0.000378337
2	0	18	78	NaN
2	0	18	79	0.0281068
2	0	18	80	0.57582
2	1	18	1	0.0548648
2	1	18	2	0.172248
2	1	18	3	0.0326442
2	1	18	4	0.0348044
2	1	18	5	0.00342243
2	1	18	6	0.0582272
2	1	18	7	0.0295036
2	1	18	8	0.357662
2	1	18	9	0.01374
2	1	18	10	0.00977506
2	1	18	11	0.0192797
2	1	18	12	0.128218
2	1	18	13	0.00668292
2	1	18	14	0.0756698
2	1	18	15	0.00124991
2	1	18	16	0.208482
2	1	18	17	-0.185838
2	1	18	18	0.171364
2	1	18	19	0.25385
2	1	18	20	0.00203298
2	1	18	21	0.00468736
2	1	18	22	0.19612
2	1	18	23	0.810884
2	1	18	24	0.143214
2	1	18	25	0.0217538
2	1	18	26	0.0367031
2	1	18	27	0.000566505
2	1	18	28	0.0296937
2	1	18	29	0.0347463
2	1	18	30	0.0225468
2	1	18	31	0.0154236
2	1	18	32	0.0337852
2	1	18	33	0.0122776
2	1	18	34	0.000102553
2	1	18	35	0.0550828
2	1	18	36	0.0119586
2	1	18	37	0.0325701
2	1	18	38	0.00426913
2	1	18	39	0.00422741
2	1	18	40	0.0289789
2	1	18	41	0.0261781
2	1	18	42	0.0439375
2	1	18	43	0.0164448
2	1	18	44	0.0194669
2	1	18	45	0.00356642
2	1	18	46	0.00670729
2	1	18	47	0.015586
2	1	18	48	0.03134
2	1	18	49	0.012188
2	1	18	50	0.006802
2	1	18	51	0.0237105
2	1	18	52	0.0377158
2	1	18	53	0.00307879
2	1	18	54	-0.9178
2	1	18	55	0.00426192
2	1	18	56	0.014802
2	1	18	57	0.0184938
2	1	18	58	0.0133385
2	1	18	59	0.00948528
2	1	18	60	0.0211692
2	1	18	61	0.253781
2	1	18	62	NaN
2	1	18	63	0.0185347
2	1	18	64	0.00388451
2	1	18	65	0.0299506
2	1	18	66	0.0102365
2	1	18	67	NaN
2	1	18	68	0.0255839
2	1	18	69	0.0202247
2	1	18	70	0.00929187
2	1	18	71	0.0165859
2	1	18	72	0.00527966
2	1	18	73	0.00721041
2	1	18	74	0.00526392
2	1	18	75	0.361353
2	1	18	76	NaN
2	1	18	77	0.00307361
2	1	18	78	0.00983607
2	1	18	79	0.033399
2	1	18	80	0.0151441
2	0	19	1	0.00472337
2	0	19	2	0.00290809
2	0	19	3	0.0990624
2	0	19	4	0.000974527
2	0	19	5	0.0226051
2	0	19	6	-0.329819
2	0	19	7	0.000645697
2	0	19	8	0.0100189
2	0	19	9	0.00183442
2	0	19	10	0.00030894
2	0	19	11	0.0220536
2	0	19	12	0.0158874
2	0	19	13	0.0137759
2	0	19	14	0.00616253
2	0	19	15	0.00885183
2	0	19	16	0.00176899
2	0	19	17	0.383199
2	0	19	18	0.0119216
2	0	19	19	0.00443065
2	0	19	20	0.0100159
2	0	19	21	0.0466116
2	0	19	22	0.0486289
2	0	19	23	0.289914
2	0	19	24	0.00516494
2	0	19	25	0.0324093
2	0	19	26	0.04082
2	0	19	27	0.0456115
2	0	19	28	0.00576706
2	0	19	29	0.0334406
2	0	19	30	0.0173954
2	0	19	31	0.0129882
2	0	19	32	0.0343713
2	0	19	33	0.0358164
2	0	19	34	0.0142567
2	0	19	35	0.00696422
2	0	19	36	-0.450888
2	0	19	37	0.0201471
2	0	19	38	0.122847
2	0	19	39	0.033617
2	0	19	40	0.0172461
2	0	19	41	-0.174544
2	0	19	42	0.302342
2	0	19	43	0.515029
2	0	19	44	0.0142595
2	0	19	45	0.336036
2	0	19	46	0.0453002
2	0	19	47	0.304324
2	0	19	48	0.519304
2	0	19	49	0.032525
2	0	19	50	0.00894595
2	0	19	51	0.0106713
2	0	19	52	0.0279265
2	0	19	53	0.0312622
2	0	19	54	0.0205085
2	0	19	55	0.0160751
2	0	19	56	0.00854581
2	0	19	57	0.0340348
2	0	19	58	0.0156031
2	0	19	59	0.027736
2	0	19	60	0.016326
2	0	19	61	0.0258996
2	0	19	62	NaN
2	0	19	63	0.0190622
2	0	19	64	0.0189102
2	0	19	65	0.0443057
2	0	19	66	0.0257028
2	0	19	67	0.0665869
2	0	19	68	0.204163
2	0	19	69	0.0289423
2	0	19	70	0.0261477
2	0	19	71	0.4292
2	0	19	72	0.105303
2	0	19	73	0.0216129
2	0	19	74	0.0282325
2	0	19	75	0.12543
2	0	19	76	0.867479
2	0	19	77	0.0667979
2	0	19	78	0.481584
2	0	19	79	0.971527
2	0	19	80	0.340827
2	1	19	1	-0.193375
2	1	19	2	-0.188235
2	1	19	3	0.965621
2	1	19	4	0.121668
2	1	19	5	-0.310482
2	1	19	6	-0.140154
2	1	19	7	0.156122
2	1	19	8	0.192055
2	1	19	9	0.123087
2	1	19	10	0.193182
2	1	19	11	0.161686
2	1	19	12	0.070917
2	1	19	13	0.0833097
2	1	19	14	0.0895629
2	1	19	15	-0.23111
2	1	19	16	0.0421791
2	1	19	17	0.125799
2	1	19	18	-0.264245
2	1	19	19	0.00880559
2	1	19	20	0.188412
2	1	19	21	NaN
2	1	19	22	0.526107
2	1	19	23	0.00135483
2	1	19	24	0.128124
2	1	19	25	-0.985569
2	1	19	26	0.144274
2	1	19	27	0.858558
2	1	19	28	0.00751704
2	1	19	29	0.0163255
2	1	19	30	0.0509574
2	1	19	31	NaN
2	1	19	32	0.0241939
2	1	19	33	0.158525
2	1	19	34	0.28601
2	1	19	35	0.549828
2	1	19	36	0.0713365
2	1	19	37	0.124616
2	1	19	38	0.100678
2	1	19	39	0.135269
2	1	19	40	0.886558
2	1	19	41	0.102737
2	1	19	42	0.118118
2	1	19	43	0.0318786
2	1	19	44	0.0114416
2	1	19	45	0.157439
2	1	19	46	0.0172791
2	1	19	47	0.0344856
2	1	19	48	0.0825905
2	1	19	49	0.133313
2	1	19	50	0.0534672
2	1	19	51	0.0238427
2	1	19	52	0.628971
2	1	19	53	0.0325657
2	1	19	54	0.0132914
2	1	19	55	0.0305323
2	1	19	56	0.387676
2	1	19	57	NaN
2	1	19	58	NaN
2	1	19	59	0.0257816
2	1	19	60	0.974145
2	1	19	61	0.0129245
2	1	19	62	0.768933
2	1	19	63	0.0471179
2	1	19	64	0.0726139
2	1	19	65	NaN
2	1	19	66	0.0318772
2	1	19	67	0.0353192
2	1	19	68	0.0210538
2	1	19	69	0.610575
2	1	19	70	0.0131609
2	1	19	71	0.042951
2	1	19	72	0.0484645
2	1	19	73	0.0381318
2	1	19	74	0.0463471
2	1	19	75	0.114839
2	1	19	76	0.00538722
2	1	19	77	0.053349
2	1	19	78	0.0143863
2	1	19	79	0.032031
2	1	19	80	0.0266101
2	0	20	1	0.00538392
2	0	20	2	0.00125572
2	0	20	3	0.0478648
2	0	20	4	0.00217755
2	0	20	5	0.0114054
2	0	20	6	0.000578244
2	0	20	7	0.00193921
2	0	20	8	0.00228172
2	0	20	9	0.00895091
2	0	20	10	0.0074776
2	0	20	11	-0.271628
2	0	20	12	0.00981606
2	0	20	13	0.00207711
2	0	20	14	-0.155395
2	0	20	15	-0.162845
2	0	20	16	-0.209803
2	0	20	17	-0.149582
2	0	20	18	-0.224175
2	0	20	19	-0.316106
2	0	20	20	-0.252081
2	0	20	21	-0.239194
2	0	20	22	-0.242908
2	0	20	23	-0.350747
2	0	20	24	0.00165029
2	0	20	25	-0.208712
2	0	20	26	-0.254616
2	0	20	27	-0.192637
2	0	20	28	0.00221891
2	0	20	29	-0.528998
2	0	20	30	-0.212171
2	0	20	31	0.00609273
2	0	20	32	0.00575873
2	0	20	33	0.00166958
2	0	20	34	-0.283999
2	0	20	35	-0.301263
2	0	20	36	-0.164743
2	0	20	37	0.0010634
2	0	20	38	-0.402976
2	0	20	39	-0.237689
2	0	20	40	-0.335852
2	0	20	41	0.00248892
2	0	20	42	0.00216588
2	0	20	43	-0.254892
2	0	20	44	-0.282357
2	0	20	45	-0.313661
2	0	20	46	0.00320169
2	0	20	47	0.023528
2	0	20	48	0.000401498
2	0	20	49	NaN
2	0	20	50	0.0127906
2	0	20	51	0.00381178
2	0	20	52	0.00991331
2	0	20	53	0.000128762
2	0	20	54	-0.366985
2	0	20	55	0.060588
2	0	20	56	0.0521469
2	0	20	57	0.0117528
2	0	20	58	0.0186307
2	0	20	59	-0.22486
2	0	20	60	0.0271228
2	0	20	61	-0.312745
2	0	20	62	0.00359436
2	0	20	63	0.00105727
2	0	20	64	-0.267535
2	0	20	65	0.0333654
2	0	20	66	0.0267279
2	0	20	67	0.0313784
2	0	20	68	-0.279685
2	0	20	69	0.0128742
2	0	20	70	-0.282132
2	0	20	71	-0.25165
2	0	20	72	0.00218182
2	0	20	73	-0.338163
2	0	20	74	-0.313583
2	0	20	75	-0.197047
2	0	20	76	0.460381
2	0	20	77	-0.285448
2	0	20	78	-0.284186
2	0	20	79	-0.331252
[truncated: 6,001 more rows]

## Sheet: data-panel-D-channel
Experiment number	Force orientation	Subject ID	Trial number	Hold 2 - Hold 1 (force)	Move force integral
2	0	8	1	2.43575	1.67225
2	0	8	2	2.29819	1.89603
2	0	8	3	2.34829	1.72901
2	0	8	4	2.31074	1.52533
2	0	8	5	1.12069	1.42289
2	0	8	6	1.63387	1.33168
2	0	8	7	1.72174	1.43341
2	0	8	8	1.52632	1.44492
2	0	8	9	2.30705	1.63349
2	0	8	10	2.46164	1.68923
2	1	8	1	2.60642	1.60798
2	1	8	2	2.22793	1.75609
2	1	8	3	2.31939	1.73284
2	1	8	4	2.07764	1.24369
2	1	8	5	2.40768	1.66733
2	1	8	6	1.91729	1.891
2	1	8	7	2.20188	1.741
2	1	8	8	2.55982	1.73973
2	1	8	9	1.86936	1.33115
2	1	8	10	2.19957	1.75081
2	0	9	1	1.24388	1.92266
2	0	9	2	0.904349	1.55106
2	0	9	3	1.16686	1.35562
2	0	9	4	0.784209	1.2574
2	0	9	5	0.478372	1.57102
2	0	9	6	1.10867	1.81627
2	0	9	7	0.91206	1.30788
2	0	9	8	1.42248	1.88317
2	0	9	9	0.319871	1.45859
2	0	9	10	1.04747	1.70605
2	1	9	1	0.885621	1.54363
2	1	9	2	0.613325	1.67596
2	1	9	3	0.499163	0.905098
2	1	9	4	0.863619	1.53802
2	1	9	5	0.480994	1.3557
2	1	9	6	-0.84399	0.475876
2	1	9	7	0.125047	1.55959
2	1	9	8	0.730145	1.30016
2	1	9	9	0.163062	1.17113
2	1	9	10	0.7878	1.99729
2	0	10	1	1.34013	1.52458
2	0	10	2	0.675656	1.51115
2	0	10	3	0.710052	1.42423
2	0	10	4	0.871599	1.43376
2	0	10	5	1.33884	1.60254
2	0	10	6	1.24803	1.43041
2	0	10	7	0.429863	1.22271
2	0	10	8	-0.455189	0.892896
2	0	10	9	1.10462	1.35087
2	0	10	10	1.06301	1.35996
2	1	10	1	-0.726015	0.641252
2	1	10	2	-0.088414	1.3532
2	1	10	3	-0.445284	1.44612
2	1	10	4	0.170219	0.527357
2	1	10	5	0.442996	0.809099
2	1	10	6	0.211983	0.94129
2	1	10	7	-0.445927	0.888644
2	1	10	8	0.422546	0.911353
2	1	10	9	0.225056	1.12469
2	1	10	10	-0.113977	1.07642
2	0	11	1	0.774462	1.64277
2	0	11	2	0.0291178	0.877473
2	0	11	3	-0.411966	1.15285
2	0	11	4	0.656211	1.17108
2	0	11	5	0.530814	1.25466
2	0	11	6	1.47282	1.65362
2	0	11	7	0.107203	1.18802
2	0	11	8	0.53821	1.78978
2	0	11	9	0.493435	1.71614
2	0	11	10	0.334877	1.34923
2	1	11	1	0.535176	0.451137
2	1	11	2	0.139252	0.66055
2	1	11	3	0.907102	0.576695
2	1	11	4	-0.0848198	0.40133
2	1	11	5	0.758977	0.540329
2	1	11	6	0.139651	0.895845
2	1	11	7	-0.113487	0.00118699
2	1	11	8	-0.0149093	0.43776
2	1	11	9	0.723774	0.599309
2	1	11	10	-0.0277324	0.347381
2	0	12	1	0.855901	1.59954
2	0	12	2	0.0453879	1.69281
2	0	12	3	0.431519	1.97408
2	0	12	4	0.826164	1.48814
2	0	12	5	-0.220172	1.57426
2	0	12	6	0.559232	1.36537
2	0	12	7	0.244224	1.08725
2	0	12	8	0.20345	1.40098
2	0	12	9	-0.511232	1.76381
2	0	12	10	0.500168	1.47408
2	1	12	1	0.437579	0.639051
2	1	12	2	1.47872	0.991886
2	1	12	3	0.247647	0.977286
2	1	12	4	0.895017	1.07981
2	1	12	5	1.86872	1.37572
2	1	12	6	1.30697	1.48211
2	1	12	7	1.5584	1.08295
2	1	12	8	0.385602	1.29291
2	1	12	9	1.27953	1.6242
2	1	12	10	1.71872	1.76112
2	0	13	1	0.566834	1.40537
2	0	13	2	-0.843082	1.23481
2	0	13	3	-0.0762261	1.01279
2	0	13	4	0.878425	1.10374
2	0	13	5	1.08285	1.4974
2	0	13	6	0.988876	1.54575
2	0	13	7	0.546334	1.2965
2	0	13	8	0.280307	1.96277
2	0	13	9	0.56891	1.18272
2	0	13	10	1.13664	1.2097
2	1	13	1	0.610247	0.427715
2	1	13	2	-0.311628	1.02789
2	1	13	3	-0.0785903	0.59887
2	1	13	4	0.593874	0.335832
2	1	13	5	0.884292	0.503621
2	1	13	6	0.899588	0.905145
2	1	13	7	-0.0656712	0.769793
2	1	13	8	1.54671	1.39988
2	1	13	9	0.995339	0.703668
2	1	13	10	-0.641027	0.452627
2	0	14	1	0.30791	1.05377
2	0	14	2	-0.578615	1.09266
2	0	14	3	0.0935082	1.35787
2	0	14	4	-0.939495	1.04949
2	0	14	5	-0.865304	1.05171
2	0	14	6	-0.0559994	1.30836
2	0	14	7	-1.40471	1.10011
2	0	14	8	-0.281586	1.46452
2	0	14	9	-0.191394	1.12819
2	0	14	10	0.203734	1.52433
2	1	14	1	0.914501	1.8407
2	1	14	2	0.98824	1.09759
2	1	14	3	1.50396	1.4578
2	1	14	4	1.54997	1.15104
2	1	14	5	-0.0176946	1.18485
2	1	14	6	1.45863	1.19431
2	1	14	7	0.719864	1.16216
2	1	14	8	1.58764	1.79242
2	1	14	9	-0.144546	1.29636
2	1	14	10	1.06783	1.31927
2	0	15	1	1.65566	1.28431
2	0	15	2	1.18298	1.49552
2	0	15	3	0.75145	1.07404
2	0	15	4	0.471558	1.57033
2	0	15	5	0.951214	1.54273
2	0	15	6	0.494405	1.26097
2	0	15	7	1.76712	1.33498
2	0	15	8	2.48371	1.67309
2	0	15	9	0.745587	1.06167
2	0	15	10	-0.290686	0.97641
2	1	15	1	0.452187	0.967772
2	1	15	2	0.0899721	0.329624
2	1	15	3	0.816983	0.901797
2	1	15	4	1.59455	1.31919
2	1	15	5	0.880772	0.983241
2	1	15	6	0.111451	0.854434
2	1	15	7	0.399345	0.827305
2	1	15	8	-0.578372	0.414374
2	1	15	9	0.212462	0.662505
2	1	15	10	0.478912	0.751505
2	0	16	1	1.48683	1.21562
2	0	16	2	1.5725	1.28798
2	0	16	3	1.07332	1.20793
2	0	16	4	1.69326	1.39799
2	0	16	5	1.32803	1.4263
2	0	16	6	0.779384	1.61973
2	0	16	7	0.635207	1.66698
2	0	16	8	1.56019	1.37609
2	0	16	9	-0.339509	0.829142
2	0	16	10	1.06151	1.40859
2	1	16	1	0.811382	1.14303
2	1	16	2	0.452587	1.24251
2	1	16	3	0.417505	1.59913
2	1	16	4	-0.192512	0.89301
2	1	16	5	0.375059	1.0789
2	1	16	6	0.0927898	0.981507
2	1	16	7	1.21845	2.0448
2	1	16	8	1.21882	1.37277
2	1	16	9	0.0895746	1.37823
2	1	16	10	-0.0506312	1.27159
2	0	17	1	1.29866	1.69224
2	0	17	2	-0.627635	1.46127
2	0	17	3	-0.17972	1.49351
2	0	17	4	0.337077	1.63898
2	0	17	5	0.280131	1.43073
2	0	17	6	0.591885	1.74722
2	0	17	7	0.103971	1.35993
2	0	17	8	0.811393	1.47554
2	0	17	9	-0.181592	1.72321
2	0	17	10	0.146821	1.18287
2	1	17	1	0.182692	0.819325
2	1	17	2	0.695251	0.921686
2	1	17	3	0.764909	1.47976
2	1	17	4	0.501644	1.06879
2	1	17	5	1.06116	1.36282
2	1	17	6	0.701096	1.34885
2	1	17	7	1.4445	0.682439
2	1	17	8	1.27351	1.56538
2	1	17	9	0.61249	1.32149
2	1	17	10	0.961483	0.809343
2	0	18	1	-0.529922	0.747951
2	0	18	2	1.56993	1.57094
2	0	18	3	1.12592	1.14734
2	0	18	4	1.11083	1.15826
2	0	18	5	1.41176	1.13013
2	0	18	6	0.20287	1.23386
2	0	18	7	1.27164	1.26722
2	0	18	8	0.911386	1.51817
2	0	18	9	1.15741	1.03156
2	0	18	10	1.4019	1.51873
2	1	18	1	-0.0179968	0.756417
2	1	18	2	0.786156	0.958498
2	1	18	3	-0.282323	0.535655
2	1	18	4	1.1625	0.641939
2	1	18	5	0.636759	0.660857
2	1	18	6	0.809361	0.76323
2	1	18	7	0.537101	0.385258
2	1	18	8	0.170056	0.483372
2	1	18	9	0.690598	0.70554
2	1	18	10	0.541515	0.884893
2	0	19	1	1.27093	1.19196
2	0	19	2	1.42497	1.41673
2	0	19	3	1.5558	1.32463
2	0	19	4	0.789651	1.73928
2	0	19	5	1.85229	1.3618
2	0	19	6	0.936032	1.14858
2	0	19	7	2.14504	1.55893
2	0	19	8	1.11776	1.28764
2	0	19	9	0.90941	1.33039
2	0	19	10	1.67338	1.53971
2	1	19	1	0.948734	0.987956
2	1	19	2	0.762417	1.18745
2	1	19	3	1.17128	1.2803
2	1	19	4	1.26679	1.33327
2	1	19	5	0.970681	1.56008
2	1	19	6	1.1933	1.46761
2	1	19	7	0.91655	1.48691
2	1	19	8	1.13073	1.58775
2	1	19	9	1.03596	2.10039
2	1	19	10	2.07899	2.56215
2	0	20	1	1.35867	1.58192
2	0	20	2	1.79202	1.61367
2	0	20	3	1.43098	1.45533
2	0	20	4	1.14009	1.65954
2	0	20	5	0.89709	1.4842
2	0	20	6	1.07159	1.22305
2	0	20	7	1.7009	1.64151
2	0	20	8	1.77385	1.41009
2	0	20	9	0.851786	1.2855
2	0	20	10	1.77938	1.37618
2	1	20	1	1.34811	1.14763
2	1	20	2	0.284879	0.826794
2	1	20	3	0.291355	0.791579
2	1	20	4	1.42716	1.42502
2	1	20	5	1.08822	1.26062
2	1	20	6	0.713042	0.737632
2	1	20	7	1.11202	1.30471
2	1	20	8	1.51633	1.99866
2	1	20	9	0.592107	1.29977
2	1	20	10	0.969295	1.73156
2	0	21	1	1.45217	1.43614
2	0	21	2	1.12894	1.19782
2	0	21	3	1.42512	1.52529
2	0	21	4	1.79066	1.45914
2	0	21	5	0.845823	1.10223
2	0	21	6	1.11959	1.2789
2	0	21	7	1.30373	1.10079
2	0	21	8	0.527037	1.42662
2	0	21	9	0.825488	1.25513
2	0	21	10	0.406128	1.16667
2	1	21	1	1.15017	0.905691
2	1	21	2	0.0502687	1.1209
2	1	21	3	0.767602	1.15331
2	1	21	4	0.895558	0.864311
2	1	21	5	0.936219	0.863529
2	1	21	6	1.19013	1.3598
2	1	21	7	0.0636078	0.89737
2	1	21	8	0.734789	1.07847
2	1	21	9	0.856849	0.763784
2	1	21	10	-0.0600572	0.952131
2	0	22	1	1.34042	1.45073
2	0	22	2	0.665306	1.32575
2	0	22	3	1.26722	1.4036
2	0	22	4	1.66262	1.61134
2	0	22	5	1.68265	1.60259
2	0	22	6	1.58017	1.73229
2	0	22	7	1.02146	1.41752
2	0	22	8	0.999379	1.28049
2	0	22	9	1.30559	1.39994
2	0	22	10	1.85022	1.83662
2	1	22	1	0.789253	0.421844
2	1	22	2	-0.329737	0.619963
2	1	22	3	0.952437	1.28012
2	1	22	4	0.153977	1.10628
2	1	22	5	0.578788	0.735993
2	1	22	6	0.281781	0.89079
2	1	22	7	1.56165	1.01482
2	1	22	8	-0.51788	0.403957
2	1	22	9	0.232537	0.910689
2	1	22	10	0.026435	0.745896
3	0	23	1	0.169648	1.30983
3	0	23	2	-0.139743	0.846422
3	0	23	3	0.874853	1.57229
3	0	23	4	0.244905	1.17374
3	0	23	5	0.172141	0.808678
3	0	23	6	-0.0163645	1.10335
3	0	23	7	-0.418652	1.12632
3	0	23	8	-0.113359	1.41225
3	0	23	9	0.32726	1.30524
3	0	23	10	0.0132003	1.03026
3	1	23	1	0.31771	0.705749
3	1	23	2	0.18809	1.12727
3	1	23	3	0.249725	0.902854
3	1	23	4	0.65546	1.71373
3	1	23	5	0.903498	1.22382
3	1	23	6	0.544162	0.877211
3	1	23	7	0.0066994	0.757233
3	1	23	8	-0.015718	1.01234
3	1	23	9	0.554383	1.07784
3	1	23	10	-0.12352	0.769973
3	0	24	1	0.325569	0.6519
3	0	24	2	1.17597	1.73946
3	0	24	3	0.585049	1.06685
3	0	24	4	0.180793	0.783673
3	0	24	5	-0.0566768	0.899388
3	0	24	6	0.523903	1.05837
3	0	24	7	0.416417	0.908885
3	0	24	8	0.57895	1.33712
3	0	24	9	-0.38171	0.12243
3	0	24	10	0.685006	1.18551
3	1	24	1	-0.465197	0.726147
3	1	24	2	-0.139128	0.956923
3	1	24	3	0.687951	1.57377
3	1	24	4	-0.371892	1.05547
3	1	24	5	0.778191	1.28412
3	1	24	6	-0.0328205	1.35525
3	1	24	7	0.262764	0.925137
3	1	24	8	-0.287331	0.927992
3	1	24	9	-0.0994389	1.13244
3	1	24	10	0.480499	1.20046
3	0	25	1	0.437141	0.87962
3	0	25	2	0.603057	1.09302
3	0	25	3	0.49533	0.905581
3	0	25	4	-0.0558809	0.976202
3	0	25	5	0.555927	1.16368
3	0	25	6	0.388891	0.920549
3	0	25	7	1.0825	1.61336
3	0	25	8	0.494923	1.30105
3	0	25	9	0.456657	1.15634
3	0	25	10	0.692084	1.58367
3	1	25	1	0.441237	1.02546
3	1	25	2	0.433508	1.16169
3	1	25	3	NaN	NaN
3	1	25	4	0.387152	1.52554
3	1	25	5	0.673059	1.01075
3	1	25	6	NaN	NaN
3	1	25	7	0.444706	1.2094
3	1	25	8	0.418755	0.867925
3	1	25	9	0.158295	1.20276
3	1	25	10	0.422743	1.01601
3	0	26	1	0.183347	1.3388
3	0	26	2	0.734781	2.25002
3	0	26	3	1.05854	1.46987
3	0	26	4	0.461637	1.34039
3	0	26	5	0.753252	1.0289
3	0	26	6	-0.417397	1.48433
3	0	26	7	1.22503	1.41578
3	0	26	8	0.280514	1.58824
3	0	26	9	-1.11007	0.374471
3	0	26	10	-0.471895	1.02281
3	1	26	1	0.607124	1.23524
3	1	26	2	0.621579	2.34422
3	1	26	3	1.00842	1.74603
3	1	26	4	0.65165	1.53167
3	1	26	5	-0.019009	1.11825
3	1	26	6	-0.483516	1.16809
3	1	26	7	-0.476162	0.859915
3	1	26	8	-0.57773	1.03152
3	1	26	9	-0.574602	0.99093
3	1	26	10	0.579048	1.60229
3	0	27	1	0.231912	0.821463
3	0	27	2	0.489641	1.34631
3	0	27	3	0.0685085	0.705588
3	0	27	4	0.43039	0.783115
3	0	27	5	0.573263	1.26675
3	0	27	6	0.597762	1.17564
3	0	27	7	0.313265	1.24425
3	0	27	8	0.565444	1.39882
3	0	27	9	0.148602	0.89658
3	0	27	10	0.341348	1.09103
3	1	27	1	0.791613	1.39389
3	1	27	2	1.06045	1.44634
3	1	27	3	1.07546	1.42669
3	1	27	4	-0.048944	0.749425
3	1	27	5	0.976894	1.65002
3	1	27	6	0.86144	2.31385
3	1	27	7	1.52081	1.59761
3	1	27	8	1.1304	1.86664
3	1	27	9	0.883706	1.61553
3	1	27	10	1.20804	1.78605
3	0	28	1	0.522799	1.03169
3	0	28	2	-0.288496	1.07086
3	0	28	3	0.612224	1.46873
3	0	28	4	-0.0651284	1.03454
3	0	28	5	-0.303578	0.857216
3	0	28	6	0.535239	1.30737
3	0	28	7	0.220458	1.37534
3	0	28	8	0.0602253	0.910986
3	0	28	9	0.116733	0.946198
3	0	28	10	0.258073	0.969457
3	1	28	1	0.40405	2.02202
3	1	28	2	-0.401673	1.42913
3	1	28	3	-0.0731901	1.53248
3	1	28	4	0.293622	2.02526
3	1	28	5	0.413351	1.52622
3	1	28	6	-0.280743	1.66918
3	1	28	7	-0.394129	1.82814
3	1	28	8	0.517147	1.70104
3	1	28	9	-0.491909	1.61348
3	1	28	10	-0.251642	1.7801
3	0	29	1	0.0117996	1.04828
3	0	29	2	-0.071396	0.956892
3	0	29	3	0.331532	1.22478
3	0	29	4	0.0072715	0.859402
3	0	29	5	0.0648018	0.876236
3	0	29	6	0.441833	1.43811
3	0	29	7	-0.699862	0.935023
3	0	29	8	0.381316	1.41046
3	0	29	9	0.168871	1.22441
3	0	29	10	-0.219989	1.18638
3	1	29	1	0.880974	1.32097
3	1	29	2	0.913088	1.23115
3	1	29	3	0.740081	1.30914
3	1	29	4	-0.184961	1.36572
3	1	29	5	0.451412	1.2143
3	1	29	6	0.440071	1.01637
3	1	29	7	0.582269	1.2773
3	1	29	8	0.359775	1.42677
3	1	29	9	0.59237	1.44652
3	1	29	10	0.435189	1.39165
3	0	30	1	1.49909	1.01249
3	0	30	2	1.43674	1.27815
3	0	30	3	0.820818	1.12951
3	0	30	4	0.650495	0.589786
3	0	30	5	2.1653	1.59114
3	0	30	6	1.50985	1.3681
3	0	30	7	0.0561887	0.550958
3	0	30	8	1.48289	0.686854
3	0	30	9	-0.335286	0.734434
3	0	30	10	0.45303	0.626033
3	1	30	1	-0.552968	1.05891
3	1	30	2	-0.0853615	1.40723
3	1	30	3	-0.345197	1.42528
3	1	30	4	-0.00331905	1.51201
3	1	30	5	0.607243	1.2267
3	1	30	6	0.498503	1.91853
3	1	30	7	0.427631	1.22204
3	1	30	8	0.716517	1.99784
3	1	30	9	-0.0406075	1.38171
3	1	30	10	1.21475	1.37114
3	0	31	1	0.682703	0.823681
3	0	31	2	0.460722	0.763449
3	0	31	3	0.546666	1.17179
3	0	31	4	0.464394	1.49816
3	0	31	5	0.614978	1.23245
3	0	31	6	0.784613	1.26641
3	0	31	7	0.846039	1.39762
3	0	31	8	0.564292	0.929128
3	0	31	9	0.645962	1.18896
3	0	31	10	0.704786	0.933979
3	1	31	1	0.00860854	0.825309
3	1	31	2	-0.152359	0.663675
3	1	31	3	-0.0725951	1.09219
3	1	31	4	-0.0358018	1.05637
3	1	31	5	0.233929	1.16694
3	1	31	6	0.267538	1.48536
3	1	31	7	0.42403	1.18324
3	1	31	8	0.260704	1.05428
3	1	31	9	0.771827	1.00332
3	1	31	10	0.0893749	1.1249
3	0	32	1	0.749846	1.78969
3	0	32	2	0.794026	1.89648
3	0	32	3	0.815817	2.33581
3	0	32	4	0.294473	1.28155
3	0	32	5	0.934581	1.47751
3	0	32	6	1.12514	1.85718
3	0	32	7	0.696505	1.95003
3	0	32	8	0.388288	1.69062
3	0	32	9	0.581647	2.23438
3	0	32	10	1.17945	1.9344
3	1	32	1	-0.271637	0.0677363
3	1	32	2	0.0552648	0.445445
3	1	32	3	-0.173114	0.349946
3	1	32	4	0.163311	0.283692
3	1	32	5	-8.39089e-05	0.122381
3	1	32	6	0.159512	0.615899
3	1	32	7	-1.17412	0.208754
3	1	32	8	-0.951547	0.375201
3	1	32	9	-0.298049	0.735989
3	1	32	10	-1.03324	-0.197474
3	0	33	1	1.74281	1.4578
3	0	33	2	1.45252	1.25922
3	0	33	3	1.61788	1.18368
3	0	33	4	2.02308	1.71864
3	0	33	5	1.06574	1.76849
3	0	33	6	1.77498	1.61133
3	0	33	7	3.28496	0.941265
3	0	33	8	1.3741	1.41884
3	0	33	9	1.84818	2.48357
3	0	33	10	1.65608	1.57591
3	1	33	1	1.99718	1.4807
3	1	33	2	2.77512	1.16712
3	1	33	3	1.76166	1.52332
3	1	33	4	2.2227	1.08745
3	1	33	5	2.02956	1.76863
3	1	33	6	2.0361	1.24364
3	1	33	7	1.45315	1.23401
3	1	33	8	2.22425	1.13529
3	1	33	9	1.65211	1.1881
3	1	33	10	1.96824	1.57994
13	0	177	1	0.606752	1.2984
13	0	177	2	0.402841	1.23916
13	0	177	3	0.592619	1.29258
13	0	177	4	0.169494	1.20035
13	0	177	5	0.373469	1.08092
13	0	177	6	0.159473	1.14998
13	0	177	7	0.291989	1.09058
13	0	177	8	0.27739	1.26914
13	0	177	9	0.269713	1.32003
13	0	177	10	0.0382224	1.45309
13	0	177	11	0.303271	1.5752
13	0	177	12	0.405864	1.5837
13	0	177	13	0.0282631	1.44037
13	0	177	14	0.583018	1.41436
13	0	177	15	0.511848	1.82327
13	0	177	16	0.572345	1.67845
13	0	177	17	0.450679	1.77761
13	0	177	18	-0.126649	1.3217
13	0	177	19	0.291779	1.42757
13	0	177	20	0.0744927	1.554
13	0	178	1	0.185071	1.00499
13	0	178	2	1.34469	1.29597
13	0	178	3	1.33587	1.3777
13	0	178	4	1.41332	1.75514
13	0	178	5	0.99597	1.86132
13	0	178	6	0.415705	1.4968
13	0	178	7	0.868713	1.61161
13	0	178	8	0.466229	1.68437
13	0	178	9	0.301022	1.33288
13	0	178	10	0.714413	1.87858
13	0	178	11	0.306042	1.32719
13	0	178	12	0.430126	1.32203
13	0	178	13	0.484429	1.67564
13	0	178	14	0.290262	1.66938
13	0	178	15	-0.509923	1.27391
13	0	178	16	0.24473	1.46421
13	0	178	17	0.257211	1.52132
13	0	178	18	0.605349	2.16355
13	0	178	19	0.883958	2.12373
13	0	178	20	0.237353	1.327
13	0	179	1	0.331162	0.641427
13	0	179	2	0.528021	1.05791
13	0	179	3	1.12983	0.838185
13	0	179	4	0.39121	0.869464
13	0	179	5	0.647327	1.36916
13	0	179	6	-0.18716	0.827955
13	0	179	7	0.864135	1.39683
13	0	179	8	-0.274454	0.672005
13	0	179	9	0.332392	1.09697
13	0	179	10	0.277479	0.985132
13	0	179	11	0.435911	1.11941
13	0	179	12	0.38514	1.20492
13	0	179	13	0.744319	0.992574
13	0	179	14	-0.094415	1.25618
13	0	179	15	0.216367	1.34483
13	0	179	16	-0.125337	1.0702
13	0	179	17	-0.00980921	1.05704
13	0	179	18	0.236726	1.10399
13	0	179	19	0.0193047	1.15696
13	0	179	20	-0.243256	1.00846
13	0	180	1	0.0841947	1.44025
13	0	180	2	0.4528	1.28414
13	0	180	3	0.136936	1.20391
13	0	180	4	-0.369446	1.21582
13	0	180	5	0.152194	0.863027
13	0	180	6	0.371541	0.778957
13	0	180	7	0.760195	1.8222
13	0	180	8	-0.327163	0.555645
13	0	180	9	0.446285	1.19635
13	0	180	10	0.056084	0.964574
13	0	180	11	0.356451	1.32957
13	0	180	12	0.264652	1.46194
13	0	180	13	0.578982	1.32666
13	0	180	14	0.348584	1.19218
13	0	180	15	-0.102184	0.883716
13	0	180	16	0.0676637	0.686461
13	0	180	17	-0.0653512	1.18166
13	0	180	18	0.491727	1.21191
13	0	180	19	0.504454	1.14546
13	0	180	20	0.504517	1.46936
13	0	181	1	0.606762	1.01217
13	0	181	2	0.076783	0.982083
13	0	181	3	0.455012	1.19105
13	0	181	4	0.589237	0.886061
13	0	181	5	-0.424238	-0.024657
13	0	181	6	0.745543	1.10229
13	0	181	7	0.500323	0.895041
13	0	181	8	0.85487	1.22702
13	0	181	9	0.694511	1.13427
13	0	181	10	0.22273	1.06754
13	0	181	11	0.277879	1.26118
13	0	181	12	0.919936	1.12279
13	0	181	13	1.0297	1.01665
13	0	181	14	1.15715	1.38411
13	0	181	15	0.71859	1.29474
13	0	181	16	0.850925	1.66347
13	0	181	17	0.755071	1.02315
13	0	181	18	0.386845	1.34514
13	0	181	19	0.863297	1.34425
13	0	181	20	0.874851	1.26824
13	0	182	1	-0.212423	0.975866
13	0	182	2	-0.0647675	1.18018
13	0	182	3	0.15709	1.10516
13	0	182	4	0.578912	1.31946
13	0	182	5	0.572269	1.36337
13	0	182	6	0.309204	1.68663
13	0	182	7	1.01758	1.81975
13	0	182	8	0.265546	1.30516
13	0	182	9	-0.0142082	1.5463
13	0	182	10	-0.488965	0.881797
13	0	182	11	0.651332	1.77786
13	0	182	12	0.392921	1.46163
13	0	182	13	0.992355	2.45019
13	0	182	14	0.244664	1.52628
13	0	182	15	0.141489	1.42342
13	0	182	16	0.445549	1.18178
13	0	182	17	0.122832	1.63739
13	0	182	18	0.152535	1.67508
13	0	182	19	-1.02661	1.04977
13	0	182	20	0.829769	1.92427
13	0	183	1	0.0766519	0.910899
13	0	183	2	0.263471	1.11208
13	0	183	3	0.729782	1.41298
13	0	183	4	0.469138	1.23816
13	0	183	5	0.389177	0.975576
13	0	183	6	0.703911	1.44982
13	0	183	7	1.18417	1.29816
13	0	183	8	0.645817	1.51596
13	0	183	9	0.420442	1.49025
13	0	183	10	0.838355	1.2475
13	0	183	11	0.613796	0.948773
13	0	183	12	0.778706	1.10966
13	0	183	13	0.416928	1.28294
13	0	183	14	0.348964	1.01171
13	0	183	15	0.887254	1.2354
13	0	183	16	0.853522	0.986034
13	0	183	17	0.332151	1.25127
13	0	183	18	0.895725	1.4711
13	0	183	19	1.01964	1.30514
13	0	183	20	1.34859	1.34005
13	0	184	1	0.428315	1.32941
13	0	184	2	-0.0845542	1.07883
13	0	184	3	0.203985	1.28431
13	0	184	4	-0.203185	1.29736
13	0	184	5	-0.0744203	1.06991
13	0	184	6	1.17655	1.84534
13	0	184	7	-0.051511	1.58834
13	0	184	8	1.20453	1.89568
13	0	184	9	0.194557	1.52838
13	0	184	10	1.0511	1.51146
13	0	184	11	1.09762	2.21574
13	0	184	12	0.330331	1.1626
13	0	184	13	0.319078	1.3896
13	0	184	14	0.139576	1.33357
13	0	184	15	0.929224	1.23624
13	0	184	16	0.338836	1.37977
13	0	184	17	0.54771	1.46846
13	0	184	18	0.138774	1.76326
13	0	184	19	0.416316	1.32375
13	0	184	20	-0.357643	1.34504
13	0	185	1	-0.200431	0.654605
13	0	185	2	-0.685966	0.784028
13	0	185	3	0.0247494	1.00424
13	0	185	4	0.0643848	0.885209
13	0	185	5	-0.561064	1.09665
13	0	185	6	0.329548	1.12251
13	0	185	7	0.0682235	1.07212
13	0	185	8	0.222136	1.32218
13	0	185	9	-0.223063	1.16163
13	0	185	10	-0.283694	1.17243
13	0	185	11	-0.939385	0.836445
13	0	185	12	-0.018748	1.15522
13	0	185	13	0.389014	1.50098
13	0	185	14	0.631312	1.84723
13	0	185	15	0.0851727	1.23535
13	0	185	16	-0.00315165	1.26161
13	0	185	17	-0.101133	1.36159
13	0	185	18	0.0776507	1.1147
13	0	185	19	0.0320671	1.27445
13	0	185	20	0.0283302	1.13389
13	0	186	1	0.487126	0.91807
13	0	186	2	0.855114	1.27928
13	0	186	3	0.985566	0.999037
13	0	186	4	0.236871	1.67051
13	0	186	5	0.338887	1.60527
13	0	186	6	0.529741	1.2786
13	0	186	7	0.0402928	1.47524
13	0	186	8	-0.546186	0.852644
13	0	186	9	1.6083	1.13164
13	0	186	10	0.154279	1.1363
13	0	186	11	0.109849	0.939305
13	0	186	12	0.834145	0.893381
13	0	186	13	0.798126	0.74302
13	0	186	14	0.571481	1.2355
13	0	186	15	-0.102862	1.4079
13	0	186	16	0.57784	1.11815
13	0	186	17	0.70598	1.20893
13	0	186	18	0.253642	1.57967
13	0	186	19	0.931581	1.76506
13	0	186	20	-0.371438	0.850061
13	0	187	1	-0.0400542	1.06875
13	0	187	2	0.355135	1.45004
13	0	187	3	-0.0876475	0.877463
13	0	187	4	0.291267	1.36115
13	0	187	5	0.241676	0.807288
13	0	187	6	0.69907	1.23609
13	0	187	7	0.13344	1.10676
13	0	187	8	0.119605	1.33275
13	0	187	9	0.143159	1.03437
13	0	187	10	0.589158	1.87804
13	0	187	11	-0.113351	1.31867
13	0	187	12	-0.113852	1.21828
13	0	187	13	-0.414251	1.24149
13	0	187	14	0.781504	1.74676
13	0	187	15	-0.10162	1.02219
13	0	187	16	0.612611	1.76302
13	0	187	17	0.472498	1.28168
13	0	187	18	0.749184	1.22558
13	0	187	19	0.497781	1.90291
13	0	187	20	-0.114872	1.59979
13	0	188	1	0.530367	1.25216
13	0	188	2	-1.02202	0.873091
13	0	188	3	-0.471092	1.13643
13	0	188	4	-0.210314	0.786608
13	0	188	5	-0.0392608	0.934703
13	0	188	6	-0.279829	1.01236
13	0	188	7	0.00642409	0.93053
13	0	188	8	0.413024	1.23405
13	0	188	9	0.0315613	1.27252
13	0	188	10	-0.312563	1.10687
13	0	188	11	0.489233	1.47518
13	0	188	12	0.318704	1.27135
13	0	188	13	-0.107693	1.23115
13	0	188	14	-0.35891	0.76287
13	0	188	15	-0.812941	0.53869
13	0	188	16	-0.495824	1.05486
13	0	188	17	0.250587	0.783565
13	0	188	18	0.127385	1.15994
13	0	188	19	-0.891153	0.856186
13	0	188	20	0.712179	1.52538
13	0	189	1	-0.0417655	0.788863
13	0	189	2	2.29865	0.874266
13	0	189	3	0.559456	0.889259
13	0	189	4	-1.15484	-0.762387
13	0	189	5	-0.25306	0.909676
13	0	189	6	0.698711	1.11182
13	0	189	7	0.0828781	0.00026978
13	0	189	8	-0.731724	0.566684
13	0	189	9	0.316012	0.899784
13	0	189	10	0.687573	1.26389
13	0	189	11	-0.590057	0.848457
13	0	189	12	0.11305	0.756441
13	0	189	13	-0.623583	0.532628
13	0	189	14	-0.583861	1.21536
13	0	189	15	0.347591	1.11789
13	0	189	16	-0.625036	0.599796
13	0	189	17	0.736266	1.46778
13	0	189	18	0.219328	0.715581
13	0	189	19	0.269079	0.987987
13	0	189	20	-0.740395	0.535673
13	0	190	1	0.24054	1.15301
13	0	190	2	-0.0258265	1.08801
13	0	190	3	-0.163649	1.00793
13	0	190	4	-0.303587	1.21816
13	0	190	5	-0.752186	0.716044
13	0	190	6	-0.59043	0.673041
13	0	190	7	0.198385	0.0137489
13	0	190	8	-0.230814	0.865295
13	0	190	9	0.69318	1.56858
13	0	190	10	-0.319118	0.949945
13	0	190	11	0.467836	1.14753
13	0	190	12	0.990131	1.56074
13	0	190	13	0.206074	1.2736
13	0	190	14	-0.431312	0.760086
13	0	190	15	-0.493655	1.26622
13	0	190	16	0.29783	1.29015
13	0	190	17	-0.0982366	1.67976
13	0	190	18	-0.204539	1.16439
13	0	190	19	0.323826	1.5079
13	0	190	20	0.648343	1.29774
13	0	191	1	1.2464	1.36565
13	0	191	2	0.92635	1.24705
13	0	191	3	1.58659	1.68161
13	0	191	4	0.637499	1.1102
13	0	191	5	1.34392	1.79032
13	0	191	6	0.986393	1.48771
13	0	191	7	0.441883	1.79221
13	0	191	8	0.323918	1.35046
13	0	191	9	0.463454	1.54896
13	0	191	10	1.18844	1.36363
13	0	191	11	0.367664	1.26999
13	0	191	12	0.246351	1.03447
13	0	191	13	0.837039	1.48884
13	0	191	14	0.338045	1.72703
13	0	191	15	0.860638	1.17191
13	0	191	16	0.931609	1.29486
13	0	191	17	0.313039	1.25193
13	0	191	18	1.56625	1.72148
13	0	191	19	1.42336	1.84915
13	0	191	20	0.658982	1.53511
12	1	160	1	2.13974	1.72819
12	1	160	2	2.2409	1.59204
12	1	160	3	1.78516	1.32325
12	1	160	4	2.33856	1.51954
12	1	160	5	2.34237	1.691
12	1	160	6	2.02705	1.75341
12	1	160	7	2.58742	1.51737
12	1	160	8	2.31911	1.6291
12	1	160	9	1.93822	1.56569
12	1	160	10	2.29975	1.53519
12	1	160	11	1.90501	1.5426
12	1	160	12	2.27875	1.54095
12	1	160	13	2.03534	1.24669
12	1	160	14	2.32176	1.85115
12	1	160	15	2.67055	2.10494
12	1	160	16	1.9572	1.55371
12	1	160	17	2.66078	1.88431
12	1	160	18	2.01413	1.68506
12	1	160	19	2.48948	1.53567
12	1	160	20	2.21458	1.58195
12	1	161	1	0.375541	1.15479
12	1	161	2	0.45572	0.868366
12	1	161	3	0.388108	1.18072
12	1	161	4	0.518031	1.22724
12	1	161	5	0.585937	1.14397
12	1	161	6	0.286441	1.2458
12	1	161	7	-0.122651	1.13851
12	1	161	8	0.367743	1.28823
12	1	161	9	-0.560331	1.24265
12	1	161	10	0.00161824	1.16061
12	1	161	11	-0.443122	1.22648
12	1	161	12	-0.182648	1.26471
12	1	161	13	-0.475239	1.28041
12	1	161	14	0.481678	1.3751
12	1	161	15	-0.107039	1.22536
12	1	161	16	-0.0367441	1.13676
12	1	161	17	0.634151	1.21372
12	1	161	18	0.481496	1.13414
12	1	161	19	0.285701	1.14992
12	1	161	20	-0.434284	1.10256
12	1	162	1	-0.393363	0.472913
12	1	162	2	0.148828	0.729952
12	1	162	3	0.171199	1.31047
12	1	162	4	0.902246	1.36527
12	1	162	5	0.394298	0.957052
12	1	162	6	0.025051	1.012
12	1	162	7	0.463695	1.09576
12	1	162	8	0.474931	1.33794
12	1	162	9	0.645555	1.10333
12	1	162	10	0.766448	1.2099
12	1	162	11	0.839992	1.57931
12	1	162	12	1.05666	1.4276
12	1	162	13	-0.0771767	1.10329
12	1	162	14	0.163933	1.18918
12	1	162	15	-0.369127	1.66519
12	1	162	16	0.691574	1.08115
12	1	162	17	0.675049	1.1634
12	1	162	18	0.0795389	1.05896
12	1	162	19	0.857778	1.28399
12	1	162	20	1.11604	1.54788
12	1	163	1	-0.404623	0.650805
12	1	163	2	0.61278	1.68501
12	1	163	3	1.54751	1.98009
12	1	163	4	0.0140372	1.36438
12	1	163	5	-0.567877	1.58589
12	1	163	6	-0.317341	1.31707
12	1	163	7	0.447106	1.50989
12	1	163	8	0.921375	1.50862
12	1	163	9	0.783913	1.58919
12	1	163	10	0.417152	1.51737
12	1	163	11	0.241745	1.27515
12	1	163	12	-0.000782974	1.56074
12	1	163	13	-0.302805	1.20205
12	1	163	14	-0.39765	0.867046
12	1	163	15	1.24259	1.48178
12	1	163	16	1.00198	1.41637
12	1	163	17	0.196287	1.28258
12	1	163	18	0.906803	1.28449
12	1	163	19	1.31413	1.71482
12	1	163	20	0.720686	1.14534
12	1	164	1	0.742245	1.22846
12	1	164	2	1.36825	1.49688
12	1	164	3	0.703949	1.5352
12	1	164	4	1.78897	1.82744
12	1	164	5	1.54634	1.73128
12	1	164	6	0.793579	1.0413
12	1	164	7	1.12795	1.5559
12	1	164	8	1.28012	1.49802
12	1	164	9	1.72954	1.6099
12	1	164	10	0.52517	1.28385
12	1	164	11	0.886628	1.51435
12	1	164	12	0.123597	1.305
12	1	164	13	1.02339	1.28081
12	1	164	14	0.66983	1.39484
12	1	164	15	0.776573	1.17936
12	1	164	16	1.41201	1.7319
12	1	164	17	1.40708	1.60301
12	1	164	18	0.753923	1.61867
12	1	164	19	1.21985	1.88282
12	1	164	20	1.09814	1.55988
12	1	165	1	1.09455	1.54772
12	1	165	2	-0.133567	1.10739
12	1	165	3	0.535039	1.54742
12	1	165	4	1.21412	1.31952
12	1	165	5	-0.0565285	1.457
12	1	165	6	-0.0661196	1.24753
12	1	165	7	1.62734	2.20009
12	1	165	8	0.551326	1.47013
12	1	165	9	0.600028	1.49989
12	1	165	10	1.1005	1.73418
12	1	165	11	0.440237	1.74681
12	1	165	12	0.869253	1.55161
12	1	165	13	0.521797	1.74135
12	1	165	14	-0.0157218	1.39374
12	1	165	15	0.675816	1.56429
12	1	165	16	0.529727	1.44469
12	1	165	17	0.421542	1.5203
12	1	165	18	0.381386	1.45971
12	1	165	19	0.662483	1.425
12	1	165	20	0.274924	1.50417
12	1	166	1	1.29433	1.72492
12	1	166	2	0.774251	1.41025
12	1	166	3	0.712606	1.18842
12	1	166	4	1.16047	1.57825
12	1	166	5	1.02906	1.58044
12	1	166	6	1.4974	1.68175
12	1	166	7	1.16652	1.43604
12	1	166	8	0.824176	1.48321
12	1	166	9	1.2555	1.51754
12	1	166	10	0.986897	1.33231
12	1	166	11	0.711323	1.40939
12	1	166	12	0.876023	1.26067
12	1	166	13	0.672511	1.114
12	1	166	14	1.07792	1.4583
12	1	166	15	1.23692	1.59742
12	1	166	16	1.54614	1.83606
12	1	166	17	0.841314	1.43084
12	1	166	18	1.25724	1.85398
12	1	166	19	1.34234	1.7323
12	1	166	20	1.33928	1.38595
12	1	167	1	0.571542	1.63595
12	1	167	2	1.00348	1.81717
12	1	167	3	0.490944	1.46133
12	1	167	4	0.704784	1.28683
12	1	167	5	0.750528	1.6422
12	1	167	6	0.626577	1.85407
12	1	167	7	0.375328	1.44756
12	1	167	8	1.39602	1.92756
12	1	167	9	0.939248	1.54968
12	1	167	10	1.23891	1.44245
12	1	167	11	0.767857	1.56706
12	1	167	12	0.675154	1.53407
12	1	167	13	0.219859	1.65026
12	1	167	14	0.796802	1.63386
12	1	167	15	0.397768	1.59484
12	1	167	16	1.093	1.68299
12	1	167	17	0.34299	0.620884
12	1	167	18	-0.0259403	1.53725
12	1	167	19	1.56034	1.83221
12	1	167	20	0.0880837	1.43562
12	1	168	1	0.684336	1.37091
12	1	168	2	0.457135	1.44105
12	1	168	3	1.06783	1.90161
12	1	168	4	0.188844	1.42309
12	1	168	5	0.965345	1.68668
12	1	168	6	0.277981	1.78795
12	1	168	7	1.01106	1.66177
12	1	168	8	0.690357	1.29289
12	1	168	9	1.23852	1.63022
12	1	168	10	1.00578	1.52122
12	1	168	11	1.17277	2.04064
12	1	168	12	1.67793	2.27264
12	1	168	13	1.11373	1.44908
12	1	168	14	0.81463	1.82663
12	1	168	15	0.747996	1.44632
12	1	168	16	1.2883	1.72676
12	1	168	17	1.07503	1.68921
12	1	168	18	0.725554	1.40209
12	1	168	19	1.30356	2.34048
12	1	168	20	1.37106	2.63697
12	1	169	1	0.0701349	0.657447
12	1	169	2	1.11563	1.58005
12	1	169	3	0.764226	1.35468
12	1	169	4	0.434454	1.81329
12	1	169	5	0.934086	1.54059
12	1	169	6	0.524611	1.40959
12	1	169	7	0.28075	1.44101
12	1	169	8	0.457796	2.04836
12	1	169	9	1.02637	1.2238
12	1	169	10	-0.395697	1.48974
12	1	169	11	1.0944	1.38335
12	1	169	12	0.842951	1.673
12	1	169	13	0.331364	1.32478
12	1	169	14	1.14523	1.50853
12	1	169	15	0.896661	1.64663
12	1	169	16	0.136555	1.81203
12	1	169	17	0.0749687	1.70443
12	1	169	18	1.36843	1.65226
12	1	169	19	-0.239105	1.76957
12	1	169	20	0.489183	1.68413
12	1	170	1	-0.516212	1.47147
12	1	170	2	-0.158759	1.3011
12	1	170	3	0.602259	1.48639
12	1	170	4	0.919577	1.51358
12	1	170	5	1.00776	1.74016
12	1	170	6	0.976413	1.72486
12	1	170	7	0.772269	1.70214
12	1	170	8	0.42445	1.34913
12	1	170	9	1.20073	1.65745
12	1	170	10	0.877115	1.65772
12	1	170	11	0.620241	1.76049
12	1	170	12	0.690985	1.61295
12	1	170	13	1.11532	1.92834
12	1	170	14	0.473006	1.41886
12	1	170	15	0.450271	1.73668
12	1	170	16	0.652235	1.97142
12	1	170	17	0.361926	1.14682
12	1	170	18	0.717721	1.37952
12	1	170	19	1.08219	1.79727
12	1	170	20	0.14777	0.876592
12	1	171	1	0.109939	1.09184
12	1	171	2	-0.461045	1.3119
12	1	171	3	-0.326017	0.893556
12	1	171	4	0.701579	1.07975
12	1	171	5	-0.158173	1.07747
12	1	171	6	-0.222437	1.20183
12	1	171	7	0.465976	1.51799
12	1	171	8	0.805399	1.24313
12	1	171	9	-0.506377	0.804173
12	1	171	10	1.00591	1.38034
12	1	171	11	1.52267	1.537
12	1	171	12	-0.331199	1.13751
12	1	171	13	0.489822	0.860759
12	1	171	14	0.892739	1.42936
12	1	171	15	0.0960634	1.37996
12	1	171	16	0.0301627	0.850307
12	1	171	17	0.735036	1.1913
12	1	171	18	-0.200837	0.99116
12	1	171	19	0.333471	1.12576
12	1	171	20	0.100785	1.01551
12	1	172	1	1.29345	1.25983
12	1	172	2	1.48166	1.41247
12	1	172	3	0.431228	1.2435
12	1	172	4	1.21545	1.84656
12	1	172	5	1.28812	1.27744
12	1	172	6	0.945286	1.53449
12	1	172	7	0.554244	1.36954
12	1	172	8	0.717575	1.49981
12	1	172	9	1.18971	1.15907
12	1	172	10	0.845391	1.39077
12	1	172	11	1.35938	1.51598
12	1	172	12	1.09139	1.24742
12	1	172	13	0.91258	1.39409
12	1	172	14	0.879983	1.19304
12	1	172	15	1.27347	1.53891
12	1	172	16	0.660184	1.29852
12	1	172	17	1.09613	1.6358
12	1	172	18	1.19318	1.51383
12	1	172	19	0.821307	1.74343
12	1	172	20	1.11331	1.60536
12	1	173	1	0.0869972	1.5073
12	1	173	2	0.882553	1.81666
12	1	173	3	-0.0206573	1.4317
12	1	173	4	1.12098	1.19917
12	1	173	5	0.150928	1.69298
12	1	173	6	1.03041	1.62976
12	1	173	7	-0.670495	1.33712
12	1	173	8	-0.245074	1.55324
12	1	173	9	-0.140086	1.55837
12	1	173	10	0.66955	1.42272
12	1	173	11	-0.0552319	1.45327
12	1	173	12	0.0877274	1.90474
12	1	173	13	0.344807	1.54044
12	1	173	14	0.521282	1.87788
12	1	173	15	0.297011	2.46658
12	1	173	16	1.064	1.71863
12	1	173	17	1.05109	2.1636
12	1	173	18	0.714622	1.74597
12	1	173	19	1.09074	1.65239
12	1	173	20	0.577841	1.64346
12	1	174	1	0.706518	1.35945
12	1	174	2	NaN	5.13174
12	1	174	3	0.0328806	1.05263
12	1	174	4	NaN	NaN
12	1	174	5	0.85032	1.39444
12	1	174	6	0.103647	1.28702
12	1	174	7	0.541159	1.75296
12	1	174	8	1.61286	1.9179
12	1	174	9	1.51331	1.96637
12	1	174	10	-0.0595149	1.23282
12	1	174	11	1.16459	1.67063
12	1	174	12	0.121847	1.08513
12	1	174	13	0.397511	1.1893
12	1	174	14	0.362592	1.46412
12	1	174	15	-0.157272	1.35763
12	1	174	16	-0.116958	1.00653
12	1	174	17	0.337684	1.39787
12	1	174	18	1.16346	1.35489
12	1	174	19	1.77504	1.57736
12	1	174	20	0.306504	1.96682
12	1	175	1	-0.161788	1.40768
12	1	175	2	1.16477	1.83144
12	1	175	3	0.601283	2.02951
12	1	175	4	-0.149597	1.02999
12	1	175	5	-0.220808	1.15187
12	1	175	6	-0.474482	1.34542
12	1	175	7	0.668898	1.70046
12	1	175	8	-0.021138	1.72887
12	1	175	9	0.503359	1.2667
12	1	175	10	0.00960059	1.72012
12	1	175	11	0.543827	1.42391
12	1	175	12	0.643235	1.48433
12	1	175	13	0.846267	2.18804
12	1	175	14	0.981497	1.8646
12	1	175	15	0.336277	1.64801
12	1	175	16	0.515629	1.58367
12	1	175	17	0.690417	1.85786
12	1	175	18	-0.397266	1.31832
12	1	175	19	-0.136356	1.40593
12	1	175	20	-0.0263767	1.46292
12	1	176	1	0.952029	1.25351
12	1	176	2	1.00775	1.33706
12	1	176	3	0.413824	1.0611
12	1	176	4	0.416772	1.1263
12	1	176	5	0.422396	1.53288
12	1	176	6	0.916782	1.95033
12	1	176	7	0.187101	1.31932
12	1	176	8	0.415552	1.54816
12	1	176	9	0.407452	1.34596
12	1	176	10	0.0249532	1.42137
12	1	176	11	0.630339	1.61475
12	1	176	12	0.111194	1.5313
12	1	176	13	1.14926	1.73719
12	1	176	14	0.848792	1.53285
12	1	176	15	0.488583	1.5855
12	1	176	16	-0.223761	1.15192
12	1	176	17	0.585712	1.6642
12	1	176	18	1.07745	1.61651
12	1	176	19	0.330039	1.73277
12	1	176	20	1.2796	1.74389

## Sheet: data-panel-D-gain-and-error
Experiment number	Subject ID	Endpoint error	Hold 2 - Hold 1 (force)	Move force integral	Integration gain
2	8	-0.0256342	2.25877	1.65785	1.36247
2	9	0.022264	0.768006	1.50395	0.510659
2	10	0.0769458	0.504104	1.17682	0.428361
2	11	0.0515022	0.325788	0.898841	0.362453
2	12	0.0668836	0.815562	1.35957	0.599869
2	13	0.135454	0.584966	0.958461	0.610318
2	14	0.0925488	0.395774	1.17974	0.335474
2	15	0.0803337	0.638549	1.07526	0.593856
2	16	0.0924982	0.798478	1.32204	0.603972
2	17	0.0359099	0.473239	1.33983	0.353208
2	18	-0.000723655	0.865399	0.939629	0.921001
2	19	0.103663	1.21565	1.41168	0.861137
2	20	-0.0221092	1.21179	1.37498	0.881313
2	21	0.00501509	0.968244	1.09796	0.881856
2	22	0.013943	0.790081	1.12623	0.701525
3	23	0.0523182	0.187571	1.05382	0.177992
3	24	0.0999367	0.202015	1.03879	0.194471
3	25	0.0494611	0.461626	1.10913	0.416206
3	26	0.131252	0.325547	1.28988	0.252386
3	27	0.053469	0.702269	1.36995	0.512624
3	28	0.0981459	0.00308993	1.35911	0.00227349
3	29	0.054243	0.277571	1.21619	0.228229
3	30	0.0193245	0.670466	1.13396	0.591259
3	31	0.0439379	0.396061	1.12733	0.351327
3	32	-0.00969535	0.27478	1.09683	0.250523
3	33	-0.0777999	1.85641	1.37784	1.34733
13	177	0.187425	0.29763	1.36803	0.217561
13	178	0.114159	0.448177	1.50906	0.296991
13	179	0.13235	0.304321	1.06405	0.286001
13	180	0.0766655	0.306618	1.20013	0.255488
13	181	0.0976036	0.706551	1.12853	0.626081
13	182	0.190217	0.255105	1.44252	0.176846
13	183	0.0679801	0.674864	1.24939	0.540156
13	184	0.235389	0.324705	1.3624	0.238332
13	185	0.158593	0.0265398	1.14455	0.0231879
13	186	0.0742675	0.508433	1.17261	0.43359
13	187	0.166263	0.192418	1.26158	0.15252
13	188	0.151145	-0.0734768	1.08087	-0.0679796
13	189	0.105427	0.0979638	0.861362	0.113731
13	190	0.155366	-0.0620315	1.1587	-0.0535353
13	191	0.121969	0.848839	1.42668	0.594973
12	160	-0.0566301	2.25982	1.57382	1.43589
12	161	0.0123159	0.286071	1.19722	0.238946
12	162	0.0355589	0.469313	1.17629	0.398977
12	163	0.0769446	0.432129	1.44908	0.29821
12	164	-0.00637161	1.06076	1.52478	0.695685
12	165	0.0698224	0.532383	1.50203	0.354441
12	166	0.043416	1.11919	1.47075	0.760966
12	167	0.0427634	0.689969	1.58095	0.436426
12	168	0.0514633	1.00842	1.67423	0.602319
12	169	0.161379	0.506897	1.56032	0.324867
12	170	0.0312149	0.67161	1.6352	0.410721
12	171	0.0137542	0.105362	1.13164	0.093106
12	172	-0.0573362	1.09376	1.40328	0.779428
12	173	0.0907171	0.433045	1.63661	0.264599
12	174	0.124762	0.380052	1.39444	0.272547
12	175	0.0308879	0.419818	1.534	0.273676
12	176	0.0056095	0.455489	1.53286	0.297149

## Sheet: data-panel-E
Experiment number	Subject ID	Gain null	Gain early adapt	Gain late adapt
2	8	0.00971313	1.99704	0.303989
2	9	1.61783	-0.6606	0.316299
2	10	0.70216	1.21682	0.865748
2	11	2.52392	1.37263	1.25649
2	12	0.189038	0.73492	0.183199
2	13	1.91291	2.27905	1.79607
2	14	1.50086	2.03764	0.771728
2	15	1.56025	1.1288	1.5843
2	16	2.27837	1.3511	0.198625
2	17	1.17754	1.2894	0.721246
2	18	3.35707	1.09975	0.946947
2	19	1.78905	0.939095	0.642545
2	20	1.34634	1.39931	1.26587
2	21	1.37861	1.35564	0.665504
2	22	0.729391	0.85945	1.60712
4	34	0.674904	1.8852	1.27355
4	35	1.52027	1.56843	0.674505
4	36	1.88709	1.72538	0.970063
4	37	0.278005	0.969285	-0.0646893
4	38	0.862711	0.993528	0.841812
4	39	1.67862	2.05573	1.06282
4	40	1.38685	0.555584	-0.0526778
4	41	1.72928	1.65306	0.888837
4	42	1.02791	0.951232	0.814018
5	43	0.461287	2.39542	0.736075
5	44	2.13539	1.49334	0.508392
5	45	0.562308	1.16814	0.318489
5	46	2.05848	1.74956	1.09655
5	47	2.02414	1.42576	1.03139
5	48	0.783912	2.1072	0.238368
5	49	1.86031	1.53717	0.316224
5	50	0.773865	1.98003	0.671678
