# Supplementary material for: Postural control of arm and fingers through integration of movement commands
Source: eLife. 2020 Feb 11;9:e52507. doi: 10.7554/eLife.52507 (PMC7062460; doi:10.7554/eLife.52507)
Supplement: Figure 7—source data 1. — The data are divided into two tabs, ‘data-null-field-trials’ and ‘data-force-field-trials’. For the former, data are provided for all channel trials appearing in the baseline null field period for the paretic and non-paretic arms of stroke patients, as well as their age-matched controls. For the latter, the same data are provided but for the force field adaptation period. The ‘readme’ tab describes all quantities reported in the two tabs containing participant data. [file elife-52507-fig7-data1.xlsx]

## Sheet: readme
Lead author	Scott	Albert
Title	Postural control of arm and fingers through integration of movement commands
Publication year	2020
Journal	eLife
Description	These data are reported in Figure 7 of the manuscript.
Column description (null field trials)	Arm condition	This refers to whether the data pertains to an age-matched control (0), non-paretic arm of a stroke patient (1), or paretic arm of a stroke patient (2)
	Subject ID	This is an ID number assigned to each participant.
	Trial number	This is the channel trial number on which the data were recorded
	Hold 2 - Hold 1 (force)	This is the difference in force measured during holding (hold 2 - hold 1) in Newtons
	Move force integral	This is the integral of force during movement, relative to hold 1 force (units are N-s)
Column description (force field trials)	Arm condition	This refers to whether the data pertains to an age-matched control (0), non-paretic arm of a stroke patient (1), or paretic arm of a stroke patient (2)
	Subject ID	This is an ID number assigned to each participant.
	Trial number	This is the channel trial number on which the data were recorded
	Hold 2 - Hold 1 (force)	This is the difference in force measured during holding (hold 2 - hold 1) in Newtons
	Move force integral	This is the integral of force during movement, relative to hold 1 force (units are N-s)

## Sheet: data-null-field-trials
Arm condition	Subject ID	Trial number	Hold 2 - Hold 1 (force)	Move force integral
0	1	1	-0.233944	-0.255751
0	1	2	0.858814	0.431347
0	1	3	0.301204	0.296357
0	1	4	-0.748803	-0.229858
0	1	5	0.540919	0.150069
0	1	6	-0.296159	-0.43319
0	1	7	-0.727131	-0.284694
0	1	8	0.585567	0.296793
0	1	9	-0.123079	0.0717806
0	1	10	-0.157389	-0.0428532
0	1	11	-0.436379	-0.208832
0	1	12	0.0533446	-0.0839342
0	1	13	-0.377632	0.0613354
0	1	14	0.733055	0.43605
0	1	15	0.32737	0.0958467
0	1	16	-0.342781	0.0201501
0	1	17	-0.134196	-0.320919
0	1	18	-0.277147	0.109945
0	1	19	0.336282	0.218845
0	1	20	0.118083	-0.328486
0	1	21	-0.0417943	0.0403003
0	1	22	0.187358	-0.0821399
0	1	23	0.464683	0.203525
0	1	24	-0.610247	-0.161686
0	1	25	-0.401368	-0.201067
0	1	26	-0.262274	-0.170213
0	1	27	0.584225	0.147209
0	1	28	0.0794175	0.224071
0	2	1	-0.103569	-0.147085
0	2	2	-0.203804	-0.168327
0	2	3	-0.199037	-0.0503401
0	2	4	-0.470236	-0.152308
0	2	5	0.171312	0.24763
0	2	6	0.0359044	0.127717
0	2	7	0.0481257	0.0728678
0	2	8	0.721269	-0.0622314
0	2	9	-0.090566	0.0107411
0	2	10	0.0906011	0.121335
0	2	11	-0.72324	0.0484874
0	2	12	0.548357	1.02032
0	2	13	0.196492	-0.19088
0	2	14	-0.348749	-0.172973
0	2	15	1.08371	0.407598
0	2	16	-0.125731	-0.302988
0	2	17	-0.243571	-0.300035
0	2	18	-0.50804	-0.207416
0	2	19	0.220015	-0.128626
0	2	20	-0.0992467	-0.173486
0	2	21	-0.794965	0.00239638
0	2	22	-0.545353	0.00431183
0	2	23	1.02287	0.186394
0	2	24	0.317452	-0.193103
0	2	25	-0.559905	-0.0611775
0	2	26	-1.15315	-0.919179
0	2	27	1.67803	0.381386
0	2	28	0.0350246	0.59897
0	3	1	-0.456267	-0.192075
0	3	2	-0.453856	-0.267131
0	3	3	-0.425399	-0.0871513
0	3	4	-0.527491	-0.461292
0	3	5	-0.162672	-0.0321632
0	3	6	1.3039	0.672982
0	3	7	0.842522	0.20898
0	3	8	0.486922	0.441424
0	3	9	-0.296622	-0.122201
0	3	10	-0.311034	-0.161373
0	3	11	0.157109	0.715628
0	3	12	-0.782375	-0.829492
0	3	13	-0.480218	-0.294125
0	3	14	-0.389055	-0.37216
0	3	15	0.487549	0.405194
0	3	16	-0.186774	-0.103347
0	3	17	0.535839	0.376642
0	3	18	0.711247	0.387855
0	3	19	-0.22086	-0.356702
0	3	20	0.167538	0.070508
0	3	21	-0.0441255	0.0884304
0	3	22	0.614498	0.392324
0	3	23	-0.628049	-0.549782
0	3	24	0.0576759	0.0690277
0	3	25	-0.0173038	0.255788
0	3	26	0.822986	0.0846408
0	3	27	-0.598797	-0.176177
0	3	28	-0.206885	-0.164252
0	4	1	-0.971657	-0.526766
0	4	2	-0.521071	-0.056185
0	4	3	-0.1043	0.0589789
0	4	4	-0.489358	-0.240231
0	4	5	-0.145694	-0.170776
0	4	6	0.972518	-0.00206406
0	4	7	-0.106012	0.311423
0	4	8	-0.035106	0.247251
0	4	9	0.0736915	0.359629
0	4	10	1.32699	0.0187395
0	4	11	0.915234	0.0812778
0	4	12	-0.0546137	-0.0515417
0	4	13	-0.121268	-0.144548
0	4	14	-0.28057	-0.0670934
0	4	15	-0.137492	0.0358983
0	4	16	-0.0474527	-0.101445
0	4	17	0.0778943	-0.0337514
0	4	18	-0.0339179	0.257158
0	4	19	-0.0139119	0.121828
0	4	20	-0.303902	-0.0977822
0	4	21	-0.333081	-0.366429
0	4	22	-0.529576	0.209638
0	4	23	-0.0349009	0.137403
0	4	24	0.897558	0.0193877
0	4	25	0.883981	-0.0701646
0	4	26	-0.671806	0.0910591
0	4	27	0.175247	-0.159644
0	4	28	-0.387421	0.13875
0	5	1	-0.411089	-0.0918058
0	5	2	0.45671	-0.0968593
0	5	3	0.00733709	0.0810693
0	5	4	-0.0133193	0.156536
0	5	5	-0.390608	-0.151761
0	5	6	-0.504604	-0.0328267
0	5	7	0.115034	-0.0157149
0	5	8	-0.000852763	-0.0523632
0	5	9	0.514789	0.354103
0	5	10	0.226602	-0.150377
0	5	11	-0.404489	-0.205381
0	5	12	-0.0539931	-0.047156
0	5	13	0.423841	0.275691
0	5	14	-0.232142	-0.412912
0	5	15	-0.0890873	-0.0552198
0	5	16	-0.215343	-0.0458916
0	5	17	0.196303	0.332977
0	5	18	0.0917662	-0.0834943
0	5	19	0.112258	0.0595437
0	5	20	0.170886	0.181843
0	5	21	0.552369	0.283526
0	5	22	-0.445186	-0.0156271
0	5	23	-0.229169	-0.187183
0	5	24	0.121987	-0.0807151
0	5	25	-0.544144	-0.2378
0	5	26	0.434351	-0.153259
0	5	27	-0.132707	0.0506572
0	5	28	0.2425	0.340402
0	6	1	1.23077	0.957348
0	6	2	-1.04869	-0.510125
0	6	3	0.200415	0.0620479
0	6	4	-0.183044	0.364042
0	6	5	0.385542	-0.24276
0	6	6	-0.710565	-0.292666
0	6	7	0.143868	-0.30906
0	6	8	0.204543	0.240679
0	6	9	0.206758	-0.310412
0	6	10	-0.429598	0.0409057
0	6	11	-0.802675	-0.405141
0	6	12	0.838713	0.0568948
0	6	13	0.132249	-0.283281
0	6	14	-0.00222016	0.178895
0	6	15	0.204972	0.244461
0	6	16	0.654745	0.088047
0	6	17	-0.157	0.191244
0	6	18	-0.287626	-0.0994017
0	6	19	-0.286814	0.20747
0	6	20	-0.294344	-0.179187
0	6	21	-0.111482	-0.147747
0	6	22	0.142928	-0.0224299
0	6	23	0.299382	0.287891
0	6	24	-0.330828	-0.117715
0	6	25	-0.343238	0.136866
0	6	26	-0.172781	0.0525846
0	6	27	-0.0344933	-0.213322
0	6	28	0.550513	0.0238718
0	7	1	-0.716916	-0.262951
0	7	2	0.0356617	-0.827674
0	7	3	0.423902	-0.0188776
0	7	4	0.584306	0.276223
0	7	5	-0.0665259	0.0936902
0	7	6	0.82489	0.160029
0	7	7	-0.302804	0.266428
0	7	8	0.366003	0.64991
0	7	9	-0.593313	-0.315859
0	7	10	-0.555205	-0.020918
0	7	11	-0.505788	0.203524
0	7	12	-0.537778	-0.381103
0	7	13	0.419674	0.329376
0	7	14	-0.562758	-0.0364578
0	7	15	0.474882	0.0468263
0	7	16	-0.439	-0.188652
0	7	17	0.917728	0.214704
0	7	18	0.0504298	-0.092415
0	7	19	0.198669	0.0552176
0	7	20	-0.0160597	-0.15102
0	7	21	0.0472655	0.010643
0	7	22	-0.404636	-0.175885
0	7	23	0.422726	0.22086
0	7	24	-0.0653554	-0.0556181
0	7	25	0.0413655	-0.119998
0	7	26	-0.781162	-0.326648
0	7	27	0.437898	0.263836
0	7	28	0.301898	0.182809
0	8	1	-1.18969	-0.687111
0	8	2	-0.0086625	-0.16905
0	8	3	0.335834	-0.0217957
0	8	4	0.336726	-0.252906
0	8	5	0.178124	0.0657111
0	8	6	-0.0283611	0.0971831
0	8	7	0.275678	0.405593
0	8	8	0.0308278	0.195437
0	8	9	-0.282505	-0.0201287
0	8	10	0.352032	0.387066
0	8	11	0.680746	0.502994
0	8	12	1.11213	0.0553082
0	8	13	-0.554532	-0.121486
0	8	14	1.10612	0.634158
0	8	15	-0.277737	0.0354956
0	8	16	-0.564527	-0.390699
0	8	17	-0.109432	-0.0316711
0	8	18	-0.420887	-0.326156
0	8	19	-0.267456	0.243213
0	8	20	-0.704422	-0.601157
0	8	21	0.0390035	-0.11261
0	8	22	0.131709	0.0235126
0	8	23	0.154691	0.206694
0	8	24	-0.325403	-0.117596
0	8	25	-0.601797	-0.084596
0	8	26	0.239051	-0.219926
0	8	27	0.0966581	0.0797699
0	8	28	0.266088	0.224752
0	9	1	0.0564094	0.114901
0	9	2	-0.368484	-0.291401
0	9	3	0.0997057	0.107932
0	9	4	0.472973	0.0425417
0	9	5	0.381475	0.329818
0	9	6	-0.209982	-0.0601494
0	9	7	-0.202958	0.117314
0	9	8	-0.413501	-0.30405
0	9	9	0.486643	0.19775
0	9	10	-0.302281	-0.254656
0	9	11	0.10963	0.115231
0	9	12	0.12178	0.0591921
0	9	13	-0.499417	-0.344947
0	9	14	0.0657937	0.258148
0	9	15	-0.495236	-0.217694
0	9	16	0.330375	0.10184
0	9	17	-0.442204	-0.203563
0	9	18	0.0325675	-0.261667
0	9	19	0.544613	0.315298
0	9	20	0.2321	0.178163
0	9	21	-0.302932	-0.0256892
0	9	22	-0.218956	0.0298092
0	9	23	0.749902	0.211332
0	9	24	-0.228015	-0.215452
0	9	25	-0.434091	-0.0308601
0	9	26	-0.0414097	-0.0192591
0	9	27	0.330492	0.0529278
0	9	28	0.145009	-0.00280863
0	10	1	0.168212	-0.00253612
0	10	2	-0.0556457	0.0493688
0	10	3	0.00827263	0.145013
0	10	4	0.814884	0.0760621
0	10	5	-0.294625	-0.0821484
0	10	6	-0.714542	-0.226966
0	10	7	0.504844	0.17282
0	10	8	-0.368124	-0.221003
0	10	9	0.26197	0.0127616
0	10	10	-0.325244	0.0766291
0	10	11	-0.456061	-0.147968
0	10	12	0.210356	0.129496
0	10	13	0.346755	-0.113902
0	10	14	0.448487	0.0544905
0	10	15	0.520233	-0.110806
0	10	16	0.101619	0.0667455
0	10	17	0.0434742	0.0344187
0	10	18	-0.476518	-0.0796757
0	10	19	-0.445093	0.122111
0	10	20	-0.293253	0.0450885
0	10	21	-0.356383	-0.0748768
0	10	22	0.283846	0.14551
0	10	23	-0.0243857	-0.218458
0	10	24	0.0969233	0.147825
0	10	25	0.310935	-0.00858081
0	10	26	-0.439123	-0.0628379
0	10	27	0.137765	-0.029229
0	10	28	-0.00957717	0.100648
1	1	1	0.0643438	-0.00344202
1	1	2	0.945567	0.55803
1	1	3	-1.34723	-0.235041
1	1	4	1.06451	0.0764888
1	1	5	0.52383	-0.00401527
1	1	6	-0.720609	0.0812583
1	1	7	-1.78681	-0.779706
1	1	8	0.0717856	-0.0116176
1	1	9	1.07874	0.32938
1	1	10	0.10588	-0.0113352
1	1	11	0.196414	0.535402
1	1	12	-1.68956	-0.59758
1	1	13	-1.11712	-1.08294
1	1	14	-0.564306	-0.0698057
1	1	15	0.362133	-0.0492747
1	1	16	0.262464	-0.0907113
1	1	17	-0.396289	-0.24916
1	1	18	0.103976	0.310097
1	1	19	1.54213	0.447427
1	1	20	1.30016	0.846544
1	1	21	0.537953	-0.0641054
1	1	22	-0.604034	-0.537975
1	1	23	0.420297	0.488727
1	1	24	-0.354216	0.113353
1	1	25	0.296286	-0.0777753
1	1	26	-0.451051	0.276212
1	1	27	-0.105409	-0.227295
1	1	28	0.260174	0.0288575
1	2	1	-0.0649566	-0.13311
1	2	2	0.606022	-0.0114966
1	2	3	0.120612	0.381255
1	2	4	0.22972	0.0669924
1	2	5	-0.863941	-0.489629
1	2	6	-0.526723	-0.156704
1	2	7	-0.306179	-0.0328964
1	2	8	0.632147	0.260428
1	2	9	0.658949	0.232945
1	2	10	-0.48565	-0.117786
1	2	11	-0.239303	0.351544
1	2	12	-0.324279	-0.801294
1	2	13	1.1931	1.43928
1	2	14	-0.524551	-0.869456
1	2	15	1.53818	1.36884
1	2	16	0.408404	0.482334
1	2	17	-0.17283	-0.0811392
1	2	18	-0.499565	-0.41767
1	2	19	-0.917138	-1.20613
1	2	20	-0.462027	-0.266308
1	2	21	-0.90351	-0.376739
1	2	22	-0.485084	-0.239637
1	2	23	0.883049	0.4112
1	2	24	0.505544	0.205175
1	2	25	0.796639	0.30882
1	2	26	-0.937656	-0.509223
1	2	27	0.360173	-0.274392
1	2	28	-0.219157	0.474795
1	3	1	-0.835523	-0.432904
1	3	2	-0.783678	-0.250875
1	3	3	-0.0990492	-0.335277
1	3	4	-0.105682	-0.217494
1	3	5	-0.722598	-0.0704759
1	3	6	0.710296	0.631526
1	3	7	-0.258303	-0.19896
1	3	8	1.03045	0.15476
1	3	9	0.412224	0.303022
1	3	10	0.651868	0.416678
1	3	11	-0.156556	0.0102582
1	3	12	-0.784529	-0.848974
1	3	13	0.722078	0.982467
1	3	14	0.407673	0.248369
1	3	15	-0.13345	-0.23074
1	3	16	-0.551149	-0.421135
1	3	17	-0.0027024	0.285413
1	3	18	0.543122	0.0204328
1	3	19	0.220763	0.243865
1	3	20	-0.265249	-0.289955
1	3	21	-0.230257	-0.0619606
1	3	22	0.27045	0.287376
1	3	23	-0.114235	-0.0459428
1	3	24	0.0740412	-0.179472
1	3	25	0.165739	0.0924781
1	3	26	-0.20715	-0.23212
1	3	27	-0.480896	-0.173572
1	3	28	0.522306	0.313213
1	4	1	-0.255899	-0.617059
1	4	2	-0.626664	-0.495134
1	4	3	0.0739059	0.0972122
1	4	4	0.153143	0.0323135
1	4	5	-0.319114	0.153207
1	4	6	0.176473	0.440977
1	4	7	0.541632	0.405928
1	4	8	0.0724684	0.206876
1	4	9	-0.00962151	-0.0394469
1	4	10	0.193677	-0.184874
1	4	11	0.0549776	0.192235
1	4	12	-0.210633	-0.0451322
1	4	13	-0.0644023	-0.131821
1	4	14	-0.355675	-0.232026
1	4	15	0.0267489	-0.00832822
1	4	16	0.21597	0.177602
1	4	17	0.0819082	-0.0807432
1	4	18	0.00868747	0.0964024
1	4	19	-0.0803437	-0.213276
1	4	20	0.322762	0.245087
1	4	21	-0.0293391	0.0860131
1	4	22	-0.296316	-0.198821
1	4	23	-0.11539	-0.11428
1	4	24	0.441045	0.227087
1	4	25	-0.0104946	0.0242064
1	4	26	0.581259	0.369247
1	4	27	-0.209938	0.0221985
1	4	28	-0.360826	-0.415652
1	5	1	-1.13247	-0.456254
1	5	2	0.290509	-0.135708
1	5	3	0.144777	0.163222
1	5	4	0.322041	0.0702337
1	5	5	0.0225322	-0.10782
1	5	6	-0.773742	-0.525959
1	5	7	0.726858	0.566829
1	5	8	0.285507	0.276335
1	5	9	-0.135888	-0.066421
1	5	10	0.249881	0.215543
1	5	11	-1.01004	-0.685834
1	5	12	1.73921	0.0720523
1	5	13	0.666522	0.372678
1	5	14	0.343352	0.240889
1	5	15	-0.369315	0.0399617
1	5	16	-1.03583	-0.189282
1	5	17	0.592314	0.345206
1	5	18	-0.355758	0.317256
1	5	19	0.248907	0.0681316
1	5	20	-0.819353	-0.581059
1	5	21	-0.249798	0.230147
1	5	22	-0.853943	-0.674419
1	5	23	0.713084	-0.0524103
1	5	24	0.390658	0.496683
1	5	25	-0.428491	0.352312
1	5	26	0.0364734	-0.424311
1	5	27	-0.639044	-0.474944
1	5	28	1.03106	0.546943
1	6	1	-0.589002	-0.855452
1	6	2	0.374679	-0.0100092
1	6	3	-0.19179	-0.237327
1	6	4	0.630122	0.906721
1	6	5	0.927728	0.411675
1	6	6	-0.946292	-0.447772
1	6	7	0.558022	0.405995
1	6	8	-0.17674	-0.112866
1	6	9	-0.768588	0.0258153
1	6	10	0.18186	-0.08678
1	6	11	0.720353	0.915236
1	6	12	-0.690576	-0.564187
1	6	13	-0.861471	-0.859935
1	6	14	1.31404	0.843929
1	6	15	-0.705711	-0.384765
1	6	16	-0.287687	0.60167
1	6	17	0.0800709	0.0491575
1	6	18	-0.662648	-0.907334
1	6	19	0.373565	0.283054
1	6	20	0.720066	0.0231746
1	6	21	-0.838716	-0.813933
1	6	22	0.255084	0.343452
1	6	23	0.423984	-0.0294087
1	6	24	0.159648	0.499889
1	6	25	0.272843	0.253039
1	6	26	-0.090921	0.085109
1	6	27	0.539386	0.690315
1	6	28	-0.721308	-1.02846
1	7	1	-0.458574	-0.289124
1	7	2	-0.327645	-0.165716
1	7	3	-0.843539	-0.670276
1	7	4	-0.254892	0.0449183
1	7	5	0.107016	0.146409
1	7	6	-0.0927595	-0.169976
1	7	7	0.342551	0.242189
1	7	8	0.820632	0.441316
1	7	9	0.663679	0.366601
1	7	10	0.04353	0.0536591
1	7	11	-0.963768	0.124123
1	7	12	-0.25298	-0.612937
1	7	13	0.652127	-0.0452505
1	7	14	0.48307	0.193203
1	7	15	0.420101	0.0178955
1	7	16	-0.27197	0.270896
1	7	17	0.0952133	0.241016
1	7	18	0.180664	-0.0564301
1	7	19	-0.747533	0.0621438
1	7	20	0.405075	-0.194661
1	7	21	-0.208861	-0.432387
1	7	22	0.418239	-0.0833293
1	7	23	-0.815669	-0.138125
1	7	24	0.606291	0.653841
1	7	25	1.46433	0.837853
1	7	26	-1.43962	-0.293432
1	7	27	0.407678	0.108545
1	7	28	-0.432385	-0.652966
1	8	1	-0.619412	-0.489669
1	8	2	-0.0828164	0.0641795
1	8	3	-0.163156	-0.0151392
1	8	4	0.187647	0.178091
1	8	5	0.0207703	-0.102029
1	8	6	0.0729346	-0.0236447
1	8	7	0.562417	0.35472
1	8	8	0.0495661	0.149477
1	8	9	-0.113176	-0.154233
1	8	10	0.0852262	0.0382475
1	8	11	0.536447	0.366794
1	8	12	-0.0137863	0.179851
1	8	13	0.580434	0.13346
1	8	14	0.0529887	-0.260089
1	8	15	-0.0018745	-0.0434665
1	8	16	-0.123221	0.0419232
1	8	17	-0.125275	0.02838
1	8	18	0.0514466	0.136896
1	8	19	-0.207619	-0.0489627
1	8	20	-0.749541	-0.534787
1	8	21	0.678606	0.318805
1	8	22	-0.449816	-0.290794
1	8	23	-0.218327	-0.0375074
1	8	24	-0.0104628	0.00949618
1	8	25	-0.402329	-0.344631
1	8	26	0.255477	0.0467143
1	8	27	0.252103	0.172787
1	8	28	-0.105251	0.125129
1	9	1	0.132178	0.132426
1	9	2	0.418453	-0.279805
1	9	3	-0.412449	-0.176735
1	9	4	-0.583449	0.0323831
1	9	5	-0.140857	-0.186314
1	9	6	-0.248703	-0.029694
1	9	7	0.541913	0.338621
1	9	8	0.285504	0.313503
1	9	9	-0.0500914	0.371865
1	9	10	0.0575018	-0.51625
1	9	11	-0.406945	0.292593
1	9	12	0.0535674	0.0448535
1	9	13	-0.749218	0.1344
1	9	14	0.479482	0.0502498
1	9	15	-0.0490707	-0.378503
1	9	16	0.495256	0.0321846
1	9	17	-0.0342167	0.401965
1	9	18	-0.413446	-0.161077
1	9	19	0.226271	-0.0667168
1	9	20	0.39832	-0.349948
1	9	21	0.454927	0.0299832
1	9	22	-0.233472	0.0418924
1	9	23	-0.428118	-0.403384
1	9	24	0.206663	0.331508
1	9	25	0.0657498	0.176002
1	9	26	0.0224994	0.062567
1	9	27	0.0455486	0.00686658
1	9	28	-0.133798	-0.245435
1	10	1	0.435481	0.119101
1	10	2	0.418044	-0.189064
1	10	3	-0.261501	-0.340591
1	10	4	-0.74157	-0.391784
1	10	5	-0.399969	-0.148946
1	10	6	-0.00726995	-0.174135
1	10	7	-0.253458	-0.108127
1	10	8	0.257673	0.411325
1	10	9	0.195491	0.546034
1	10	10	0.357079	0.276186
1	10	11	-1.23509	-1.36171
1	10	12	0.978091	0.839823
1	10	13	-0.124543	-0.0838207
1	10	14	-0.31632	0.152403
1	10	15	-0.110093	0.0507619
1	10	16	0.305033	0.0511094
1	10	17	0.490769	0.132615
1	10	18	-0.156952	0.0733828
1	10	19	0.0366185	0.00502581
1	10	20	0.132485	0.140409
1	10	21	0.252287	0.112864
1	10	22	-0.611938	-0.452391
1	10	23	0.0106743	-0.0317987
1	10	24	0.348977	0.371325
1	10	25	0.00659044	-0.488345
1	10	26	0.373563	-0.00222705
1	10	27	-0.232384	0.208818
1	10	28	-0.147768	0.281754
1	11	1	-0.776893	-0.749332
1	11	2	0.234646	0.15815
1	11	3	0.37836	0.226691
1	11	4	0.977523	0.213444
1	11	5	-0.0969441	0.299638
1	11	6	-0.579606	-0.116389
1	11	7	-0.086506	0.205669
1	11	8	0.19522	0.11076
1	11	9	0.32692	-0.105129
1	11	10	-0.572719	-0.243502
1	11	11	-0.0842667	0.258227
1	11	12	0.0668949	-0.132098
1	11	13	-0.316318	-0.342158
1	11	14	-0.390303	-0.664852
1	11	15	0.171203	0.0305892
1	11	16	0.0991238	0.270723
1	11	17	-0.166766	-0.0621334
1	11	18	0.274967	0.0646724
1	11	19	0.0373002	0.291975
1	11	20	0.308165	0.285056
1	11	21	0.433918	0.562697
1	11	22	-0.368709	-0.141223
1	11	23	0.260934	0.84466
1	11	24	-0.326143	-1.26613
1	11	25	-0.232905	-0.15471
1	11	26	-0.527156	-0.0107235
1	11	27	-0.0608905	-0.0156853
1	11	28	0.820951	0.181119
1	12	1	0.203309	0.221763
1	12	2	-0.217555	-0.141385
1	12	3	-0.660607	-0.383931
1	12	4	0.633201	0.15954
1	12	5	-0.269964	-0.0133882
1	12	6	0.855309	0.558866
1	12	7	-0.444978	-0.295049
1	12	8	0.0625344	-0.170396
1	12	9	-0.158888	0.101736
1	12	10	-0.00236123	-0.0377555
1	12	11	-0.691385	-0.140835
1	12	12	0.69159	0.28893
1	12	13	-0.143267	-0.128138
1	12	14	0.413824	0.134932
1	12	15	-0.0546292	-0.0523106
1	12	16	0.358693	0.0583963
1	12	17	-0.447723	0.0291866
1	12	18	0.100817	-0.0892303
1	12	19	0.0828891	0.18575
1	12	20	-0.310808	-0.286681
1	12	21	-0.332531	-0.180006
1	12	22	0.0899687	0.160048
1	12	23	-0.0482117	-0.116094
1	12	24	0.290774	0.136052
1	12	25	NaN	NaN
1	12	26	NaN	NaN
1	12	27	NaN	NaN
1	12	28	NaN	NaN
1	13	1	-1.50497	-1.16837
1	13	2	0.8596	-0.0166144
1	13	3	0.618362	0.186116
1	13	4	0.119687	0.192169
1	13	5	-0.394709	-0.0891978
1	13	6	0.188498	-0.0307302
1	13	7	-0.246293	0.0647989
1	13	8	0.386487	0.407724
1	13	9	0.127194	0.384986
1	13	10	-0.153858	0.0691223
1	13	11	0.237753	-0.110439
1	13	12	-0.417125	-0.121502
1	13	13	0.497034	0.177309
1	13	14	-1.76174	-0.199632
1	13	15	0.485104	-0.0881787
1	13	16	-0.357716	0.0883243
1	13	17	0.756994	0.254039
1	13	18	0.0273307	-0.378101
1	13	19	0.76817	0.370398
1	13	20	-0.23581	0.00778368
1	13	21	-0.178201	-0.149934
1	13	22	0.127795	0.0840007
1	13	23	0.395597	0.389711
1	13	24	-0.345191	-0.323778
1	13	25	-0.267823	0.139176
1	13	26	0.832044	0.136717
1	13	27	-0.192432	-0.256319
1	13	28	-0.371789	-0.0195736
1	14	1	-0.201224	0.0737777
1	14	2	1.44978	0.500436
1	14	3	-0.382048	-0.239451
1	14	4	-0.408823	-0.218264
1	14	5	-0.175626	0.0127217
1	14	6	-0.505213	-0.103463
1	14	7	0.102294	-0.185842
1	14	8	0.0523469	0.241775
1	14	9	0.426949	-0.230506
1	14	10	-0.358438	0.148816
1	14	11	0.985354	0.792516
1	14	12	-0.301326	-0.00591094
1	14	13	0.19721	-0.0836261
1	14	14	-0.481672	-0.0824341
1	14	15	0.408346	-0.00973133
1	14	16	-0.0882756	-0.336756
1	14	17	-0.198783	0.0928743
1	14	18	-0.101777	-0.0181033
1	14	19	0.308776	-0.0789314
1	14	20	-0.727853	-0.269897
1	14	21	0.0415399	0.257404
1	14	22	0.0268447	0.114398
1	14	23	0.521827	0.418821
1	14	24	-0.590212	-0.790623
1	14	25	-0.599625	-0.27141
1	14	26	0.240257	0.0795086
1	14	27	-0.238531	0.0516916
1	14	28	0.5979	0.14021
2	1	1	-0.624266	-0.306945
2	1	2	-0.711928	-1.13751
2	1	3	-0.032437	-0.0695721
2	1	4	0.0127728	-0.326632
2	1	5	0.630739	0.529087
2	1	6	0.668576	0.345258
2	1	7	-1.23344	-0.600518
2	1	8	0.45331	0.527708
2	1	9	0.948301	0.607679
2	1	10	-0.111627	0.431448
2	1	11	-0.488984	-0.552157
2	1	12	-0.127681	0.0554352
2	1	13	0.262257	0.312068
2	1	14	-0.671209	-0.264747
2	1	15	0.263624	0.0953868
2	1	16	0.368906	-0.292403
2	1	17	-0.298802	0.199324
2	1	18	0.06762	0.105267
2	1	19	0.529873	0.451349
2	1	20	0.0943966	-0.109524
2	1	21	0.508736	-0.0964147
2	1	22	0.311018	0.185315
2	1	23	-0.758048	-0.344787
2	1	24	-0.061706	0.255887
2	1	25	-1.23201	-0.391962
2	1	26	-0.420206	-0.091522
2	1	27	0.287424	-0.0558146
2	1	28	1.36479	0.539299
2	2	1	-0.151946	0.498647
2	2	2	0.746953	0.481876
2	2	3	0.370133	0.669227
2	2	4	-0.845699	-0.756869
2	2	5	0.815322	0.160449
2	2	6	0.0127452	0.866893
2	2	7	0.5081	0.885395
2	2	8	-1.04254	-1.16429
2	2	9	0.584359	-0.438134
2	2	10	-0.997426	-1.20319
2	2	11	0.441564	0.813331
2	2	12	0.533408	0.0555679
2	2	13	2.34782	2.44992
2	2	14	0.059011	-0.109597
2	2	15	0.715451	1.43613
2	2	16	-0.613961	0.097087
2	2	17	-1.43162	-1.49366
2	2	18	-0.732831	-1.01758
2	2	19	-1.87917	-3.311
2	2	20	0.560327	1.0798
2	2	21	-0.651192	-0.059796
2	2	22	-0.0760441	-0.0116301
2	2	23	0.224026	-0.0471126
2	2	24	0.50321	0.118539
2	2	25	1.09257	2.3903
2	2	26	1.53649	0.97027
2	2	27	-2.26328	-3.45598
2	2	28	-0.365779	0.0954099
2	3	1	-0.481552	-0.595538
2	3	2	1.23885	1.07333
2	3	3	0.294378	0.247591
2	3	4	-0.165753	0.0320966
2	3	5	-1.41261	-0.963723
2	3	6	0.171664	0.206763
2	3	7	-0.189681	-0.572189
2	3	8	0.165269	0.281757
2	3	9	0.305335	0.300065
2	3	10	0.0741018	-0.0101519
2	3	11	-1.6131	-0.62722
2	3	12	0.251849	-0.425661
2	3	13	0.814791	-0.178273
2	3	14	-0.472143	0.029428
2	3	15	-0.124555	0.435422
2	3	16	0.189482	0.0421512
2	3	17	-0.397941	-0.113156
2	3	18	0.404478	0.0926408
2	3	19	0.104945	0.103486
2	3	20	0.842192	0.641183
2	3	21	1.1403	0.931387
2	3	22	-0.31248	-0.295576
2	3	23	-0.485287	-0.190768
2	3	24	-0.342537	-0.445043
2	3	25	-0.414005	-0.0900553
2	3	26	-0.182766	-0.0792004
2	3	27	0.341332	-0.0525094
2	3	28	0.255439	0.221765
2	4	1	0.633299	0.22256
2	4	2	-0.2193	-0.153032
2	4	3	-0.22945	-0.192508
2	4	4	0.102958	0.443101
2	4	5	0.0226392	-0.0688544
2	4	6	0.52177	-0.0497484
2	4	7	-0.586291	-0.277245
2	4	8	-0.0685201	-0.128968
2	4	9	0.40698	0.284062
2	4	10	-0.584086	-0.0793668
2	4	11	0.319482	0.0534386
2	4	12	-0.523887	0.32182
2	4	13	0.037294	0.102584
2	4	14	-0.857402	-0.463169
2	4	15	-0.200244	-0.492407
2	4	16	0.762413	0.160828
2	4	17	0.218287	-0.130413
2	4	18	-0.190914	-0.111309
2	4	19	0.176575	0.273626
2	4	20	0.258396	0.285002
2	4	21	-0.192325	-0.114666
2	4	22	-0.373453	-0.0632708
2	4	23	0.573789	0.114894
2	4	24	-0.00801103	0.0630433
2	4	25	0.280308	-0.0506388
2	4	26	-0.816808	0.0790134
2	4	27	-0.554323	-0.0990631
2	4	28	1.09082	0.0706885
2	5	1	1.07208	-0.174038
2	5	2	-0.566468	-0.350876
2	5	3	-0.0930348	0.29133
2	5	4	0.172927	-0.155299
2	5	5	-1.69299	-1.62532
2	5	6	0.675066	0.150977
2	5	7	-0.501024	0.2345
2	5	8	0.519444	1.01689
2	5	9	-0.800129	-0.21468
2	5	10	1.21413	0.826515
2	5	11	0.622045	0.129129
2	5	12	0.687692	0.339026
2	5	13	0.675669	1.24138
2	5	14	-0.605968	-0.076765
2	5	15	-1.41486	0.118907
2	5	16	0.51619	0.363629
2	5	17	0.745494	0.737791
2	5	18	1.12864	0.524282
2	5	19	-2.05845	-3.25388
2	5	20	-0.296448	-0.123498
2	5	21	1.07101	0.799723
2	5	22	-0.613775	0.225535
2	5	23	-0.487919	-0.894238
2	5	24	0.0306844	-0.13102
2	5	25	0.676937	-0.375617
2	5	26	0.0667534	0.410801
2	5	27	0.14899	0.329909
2	5	28	-0.89268	-0.365093
2	6	1	-0.516481	-0.659708
2	6	2	0.565182	-0.234157
2	6	3	-0.338919	0.198673
2	6	4	-1.26646	-0.36911
2	6	5	-0.320492	-0.0776906
2	6	6	0.100858	0.390343
2	6	7	-0.024387	-0.256443
2	6	8	2.20371	1.22145
2	6	9	0.079942	-0.0820586
2	6	10	-0.482954	-0.131297
2	6	11	1.56557	-0.272527
2	6	12	0.10594	0.137289
2	6	13	-0.303618	0.0807638
2	6	14	0.166663	0.519738
2	6	15	0.824366	-0.0214642
2	6	16	0.156473	0.540261
2	6	17	0.109735	-0.0164393
2	6	18	-1.58861	-0.818507
2	6	19	-0.323643	-0.113953
2	6	20	-0.712877	-0.0351612
2	6	21	-1.2979	-0.425245
2	6	22	3.36868	1.33315
2	6	23	-0.909769	-0.893912
2	6	24	-1.16101	-0.0139967
2	6	25	0.64352	0.363603
2	6	26	-0.495471	-0.578864
2	6	27	0.228539	-0.240311
2	6	28	-0.376588	0.455572
2	7	1	-0.819092	-0.330686
2	7	2	0.0725914	0.35594
2	7	3	0.0746524	0.114826
2	7	4	-0.218117	-0.452912
2	7	5	0.0768452	0.259488
2	7	6	-0.389924	-0.295346
2	7	7	0.487368	0.130641
2	7	8	0.102152	-0.180095
2	7	9	-0.0961664	-0.369487
2	7	10	0.709691	0.767632
2	7	11	-1.38214	-0.775843
2	7	12	-0.147604	0.305112
2	7	13	-0.970402	-0.141696
2	7	14	0.88605	0.444018
2	7	15	0.516217	0.392314
2	7	16	-1.11476	-0.481508
2	7	17	0.66516	0.552656
2	7	18	0.386418	-0.068441
2	7	19	0.730375	-0.0702995
2	7	20	0.430692	-0.156313
2	7	21	1.52593	1.08079
2	7	22	-0.14122	-0.738973
2	7	23	-0.403642	0.181195
2	7	24	-0.981067	-0.523012
2	7	25	0.571735	0.298052
2	7	26	-1.14135	-0.817005
2	7	27	0.232998	-0.022729
2	7	28	0.336612	0.541682
2	8	1	-0.0312481	-0.473193
2	8	2	-0.481386	-1.28481
2	8	3	1.53402	0.307191
2	8	4	0.655753	0.647442
2	8	5	-0.671239	0.78944
2	8	6	-0.557316	-1.16529
2	8	7	-0.409815	0.430585
2	8	8	-0.088719	0.0246983
2	8	9	1.17644	0.493887
2	8	10	-1.12649	0.230044
2	8	11	-0.532063	-0.395395
2	8	12	2.1367	1.73708
2	8	13	0.31047	0.18859
2	8	14	0.220376	0.328079
2	8	15	0.18229	-0.0315808
2	8	16	-0.346434	-0.483883
2	8	17	-0.256017	-0.361797
2	8	18	-0.33414	0.0101439
2	8	19	-0.479805	-0.622704
2	8	20	-0.901379	-0.368537
2	8	21	-0.0469444	0.104392
2	8	22	0.255301	0.395656
2	8	23	-0.206876	-0.850242
2	8	24	-0.00148116	0.350194
2	8	25	-0.941713	-0.24646
2	8	26	1.10109	0.318995
2	8	27	0.35701	0.0523799
2	8	28	-0.516387	-0.124915
2	9	1	1.03055	0.370106
2	9	2	-0.112982	-0.895074
2	9	3	0.567996	0.0703787
2	9	4	0.169925	0.0353984
2	9	5	-0.825212	-0.42367
2	9	6	-0.380986	0.0596484
2	9	7	0.0628303	0.153536
2	9	8	-0.550361	-0.23746
2	9	9	-0.803819	-0.00155471
2	9	10	0.842056	0.868691
2	9	11	0.273084	0.126839
2	9	12	-0.555349	-0.28166
2	9	13	-4.46339	-2.52073
2	9	14	0.437619	0.0722218
2	9	15	0.185883	0.100228
2	9	16	0.677267	0.341196
2	9	17	1.00496	0.325898
2	9	18	0.905522	0.409443
2	9	19	0.982875	1.04977
2	9	20	0.551532	0.37679
2	9	21	-0.718529	-0.589551
2	9	22	1.0499	0.451591
2	9	23	0.019854	-0.0228709
2	9	24	-0.351221	0.16083
2	9	25	0.178741	0.246838
2	9	26	-0.843819	-0.968764
2	9	27	0.936899	0.887587
2	9	28	-0.27182	-0.165661
2	10	1	0.392081	0.199512
2	10	2	-0.139612	-0.988835
2	10	3	-1.498	-1.00098
2	10	4	-0.671171	0.19262
2	10	5	0.374921	0.704436
2	10	6	0.439771	-0.0778506
2	10	7	0.39973	0.169319
2	10	8	0.42941	0.135819
2	10	9	-0.189886	0.0507797
2	10	10	0.462751	0.615177
2	10	11	2.75529	2.26476
2	10	12	-0.115317	0.513743
2	10	13	-2.10279	-0.0451024
2	10	14	-1.53045	-1.31606
2	10	15	-3.14541	-1.01532
2	10	16	0.0671064	-0.586111
2	10	17	-1.66053	-2.13502
2	10	18	-0.949579	-1.27797
2	10	19	-1.32722	-2.08053
2	10	20	8.0089	5.67761
2	10	21	3.25148	3.60846
2	10	22	-2.96851	-2.80991
2	10	23	-1.27989	-2.30669
2	10	24	0.996916	1.50814
2	10	25	-0.268472	0.211083
2	10	26	0.976019	0.268135
2	10	27	0.461454	0.453953
2	10	28	-1.169	-0.933171
2	11	1	-0.184265	-0.441951
2	11	2	0.00534693	-0.334439
2	11	3	-0.0900241	0.349454
2	11	4	-0.357643	-0.0506737
2	11	5	0.0646429	0.265461
2	11	6	0.848895	-0.229816
2	11	7	-0.304424	0.0595925
2	11	8	0.23698	-0.0586287
2	11	9	0.234698	0.109954
2	11	10	-0.454208	0.331046
2	11	11	-2.20557	-0.498135
2	11	12	-0.736002	-0.891596
2	11	13	0.120632	0.165735
2	11	14	-0.117273	-0.124091
2	11	15	1.02497	0.477777
2	11	16	0.315338	0.499775
2	11	17	0.382509	0.460982
2	11	18	0.521436	-0.168676
2	11	19	-0.270344	0.0103421
2	11	20	0.964307	0.0678883
2	11	21	-0.391899	-0.533961
2	11	22	-0.405172	0.349421
2	11	23	1.08429	0.404123
2	11	24	-0.28722	-0.219583
2	11	25	-0.102815	-0.338197
2	11	26	0.23032	-0.257543
2	11	27	0.352179	0.159764
2	11	28	-0.479684	0.435975
2	12	1	-0.596762	-0.364741
2	12	2	0.609558	0.351987
2	12	3	1.04823	0.620746
2	12	4	-0.222163	-0.234308
2	12	5	-0.145884	0.162104
2	12	6	0.263476	0.127023
2	12	7	-0.715063	-0.466872
2	12	8	-0.192934	-0.0249843
2	12	9	-0.185258	-0.404499
2	12	10	0.136804	0.233545
2	12	11	-0.64622	-0.496726
2	12	12	0.431015	0.050871
2	12	13	0.318625	0.314495
2	12	14	0.130842	0.36206
2	12	15	-0.54836	-0.341304
2	12	16	-0.373101	-0.16491
2	12	17	-0.115254	0.131243
2	12	18	0.0119544	-0.0558322
2	12	19	0.217776	0.124806
2	12	20	0.572722	0.0752974
2	12	21	-0.22558	-0.0608894
2	12	22	-0.370551	0.101129
2	12	23	-0.0055345	0.240519
2	12	24	0.601665	-0.280759
2	12	25	-0.348236	-0.185628
2	12	26	-0.33286	-0.205924
2	12	27	-0.118543	0.407183
2	12	28	0.799639	-0.0156311
2	13	1	-0.561022	-0.608301
2	13	2	0.283522	0.055653
2	13	3	-0.579507	-0.255243
2	13	4	0.222439	0.269031
2	13	5	-0.0957473	0.0721524
2	13	6	-0.469897	-0.441937
2	13	7	0.196684	0.396788
2	13	8	0.2869	0.335897
2	13	9	0.145651	0.216452
2	13	10	0.570977	-0.0404924
2	13	11	-1.17162	-0.167819
2	13	12	-0.690679	-0.137447
2	13	13	0.924403	0.59504
2	13	14	0.245165	0.254134
2	13	15	0.28889	-0.101357
2	13	16	0.0835947	0.151054
2	13	17	-0.444942	-0.345577
2	13	18	0.16482	0.0643691
2	13	19	-0.628982	-0.720735
2	13	20	1.22935	0.408339
2	13	21	-0.415696	-0.166297
2	13	22	-0.210144	0.316199
2	13	23	0.75314	0.259513
2	13	24	-0.1273	-0.409416
2	13	25	0.371692	0.516552
2	13	26	-0.367783	-0.036129
2	13	27	0.0385243	0.0190807
2	13	28	-0.0424336	-0.499504
2	14	1	-0.284377	-0.0692835
2	14	2	-0.768083	-0.315961
2	14	3	-0.266868	-1.08918
2	14	4	0.352097	0.733255
2	14	5	-0.279157	0.194308
2	14	6	-0.656208	-0.209244
2	14	7	-0.232787	-0.0647952
2	14	8	1.73216	0.624264
2	14	9	0.081164	-0.00432251
2	14	10	0.322063	0.200958
2	14	11	-0.159013	-0.192574
2	14	12	0.955713	0.229698
2	14	13	0.0933766	-0.0615425
2	14	14	-0.387696	-0.13841
2	14	15	0.0772104	-0.116097
2	14	16	-0.00259757	0.457569
2	14	17	-0.185243	-0.254901
2	14	18	-0.0628953	0.0388147
2	14	19	-0.0628648	0.282393
2	14	20	-0.26599	-0.24495
2	14	21	0.285017	0.308533
2	14	22	-0.00988408	0.11945
2	14	23	-0.179948	-0.334444
2	14	24	-0.0951852	-0.0935392
2	14	25	0.118308	0.369813
2	14	26	0.300128	0.0250609
2	14	27	-0.472359	-0.318297
2	14	28	0.0539234	-0.0765778

## Sheet: data-force-field-trials
Arm condition	Subject ID	Trial number	Hold 2 - Hold 1 (force)	Move force integral
0	1	1	-0.425586	-0.231613
0	1	2	0.0641381	-0.106715
0	1	3	-0.366839	0.0385548
0	1	4	0.743849	0.413269
0	1	5	0.338164	0.073066
0	1	6	-0.331988	-0.00263059
0	1	7	-0.123402	-0.343699
0	1	8	-0.266353	0.0871639
0	1	9	0.347075	0.196064
0	1	10	0.128876	-0.351267
0	1	11	0.0699346	-0.22592
0	1	12	-0.323452	0.186259
0	1	13	-0.139051	-0.632282
0	1	14	-0.293988	-0.200717
0	1	15	0.080023	-0.45792
0	1	16	-0.0918459	-0.310808
0	1	17	-0.753225	-0.651022
0	1	18	0.189803	-0.372528
0	1	19	-0.436539	-0.748914
0	1	20	-0.271754	-0.379968
0	1	21	-0.443988	-0.446024
0	1	22	-0.287872	-0.527188
0	1	23	0.00512876	-0.619983
0	1	24	-1.02022	-0.91789
0	1	25	-0.607413	-0.821271
0	1	26	-0.494198	-0.745657
0	1	27	-1.08837	-0.65498
0	1	28	-0.799197	-1.18286
0	1	29	-0.0983473	-1.05035
0	1	30	-0.0779766	-1.01334
0	1	31	-1.08124	-1.16608
0	1	32	-0.335919	-1.05197
0	1	33	-0.501027	-0.988276
0	1	34	-1.57741	-1.43973
0	1	35	-1.21104	-1.17232
0	1	36	-0.762217	-0.677325
0	1	37	-0.148008	-1.10545
0	1	38	-0.239482	-0.761666
0	1	39	-0.893357	-1.19962
0	1	40	-1.02675	-0.98437
0	1	41	-1.62498	-1.17585
0	1	42	-1.28234	-0.918901
0	1	43	-0.320922	-0.597637
0	1	44	-0.787342	-0.547001
0	1	45	-0.101879	-0.752443
0	1	46	-0.613876	-0.360712
0	1	47	-0.546931	-0.342721
0	1	48	0.538742	-0.0831621
0	1	49	0.122871	-0.0297364
0	1	50	-0.120166	-0.293763
0	1	51	-0.223251	-0.347928
0	1	52	-0.0841563	-0.317074
0	1	53	0.762342	0.000347089
0	1	54	0.257535	0.0772096
0	1	55	-0.260208	-0.297758
0	1	56	0.83255	0.389339
0	1	57	0.27494	0.254349
0	1	58	-0.775066	-0.271865
0	1	59	0.514655	0.108061
0	1	60	-0.322423	-0.475197
0	1	61	-0.753395	-0.326702
0	1	62	0.559303	0.254785
0	1	63	-0.149343	0.0297731
0	1	64	-0.183652	-0.0848607
0	1	65	0.658985	0.00784602
0	1	66	-0.330836	-0.0749492
0	1	67	-0.706611	-0.321157
0	1	68	-0.248631	-0.0897175
0	1	69	0.208143	0.229265
0	1	70	-0.445019	-0.00781654
0	1	71	0.83757	0.941907
0	1	72	-0.0869822	0.344897
0	1	73	0.736548	0.626653
0	1	74	-0.184545	0.347502
0	1	75	-0.957331	-0.0366297
0	1	76	0.72089	0.582519
0	1	77	0.374534	0.740722
0	1	78	-0.0567137	0.630877
0	1	79	1.27628	1.28159
0	1	80	0.681431	0.791716
0	1	81	1.66778	1.81189
0	1	82	1.36512	1.48995
0	1	83	1.50615	1.30646
0	1	84	0.867551	0.975667
0	1	85	0.360987	0.710682
0	1	86	1.39398	1.20194
0	1	87	-0.00855755	0.510673
0	1	88	0.86978	1.12666
0	1	89	1.41924	1.09253
0	1	90	1.17295	1.21132
0	1	91	0.624879	0.869465
0	1	92	1.44056	1.50221
0	1	93	1.36846	1.11928
0	1	94	0.877907	0.999143
0	1	95	0.292537	0.442653
0	1	96	-0.0969451	0.319515
0	1	97	0.257371	0.52474
0	1	98	0.457364	0.712476
0	1	99	0.815022	0.67458
0	1	100	0.31434	0.453167
0	1	101	-0.152901	0.335746
0	1	102	0.235104	0.0967968
0	1	103	-0.0328582	0.237003
0	1	104	-0.392265	-0.312301
0	1	105	0.132809	0.105516
0	1	106	0.361961	-0.0169241
0	1	107	0.639286	0.268741
0	1	108	-0.435644	-0.0964699
0	2	1	-0.762741	0.0356538
0	2	2	0.508856	1.00748
0	2	3	0.156991	-0.203714
0	2	4	-0.38825	-0.185807
0	2	5	1.04421	0.394765
0	2	6	-0.165232	-0.315821
0	2	7	-0.283072	-0.312868
0	2	8	-0.547541	-0.22025
0	2	9	0.180515	-0.141459
0	2	10	-0.138747	-0.18632
0	2	11	0.383372	-0.11781
0	2	12	-0.563589	-0.662172
0	2	13	0.0188838	-0.657814
0	2	14	-0.791114	-0.727314
0	2	15	-1.24965	-1.23409
0	2	16	-1.10168	-0.96987
0	2	17	-1.35962	-1.22811
0	2	18	-0.144981	-0.614438
0	2	19	-1.3955	-1.37777
0	2	20	-0.907426	-1.32451
0	2	21	-2.15129	-2.09557
0	2	22	-2.1598	-2.1456
0	2	23	-0.55179	-1.77734
0	2	24	-0.868147	-1.53939
0	2	25	-1.78918	-2.1002
0	2	26	-1.71316	-1.66576
0	2	27	-0.921784	-1.4904
0	2	28	-1.36697	-1.85485
0	2	29	-1.13495	-1.8494
0	2	30	-0.538537	-1.52514
0	2	31	-1.98375	-1.71063
0	2	32	-2.60121	-2.25904
0	2	33	-1.19608	-1.76664
0	2	34	-1.77826	-1.89063
0	2	35	-2.19219	-1.98448
0	2	36	-1.98723	-1.87207
0	2	37	-1.78392	-1.81186
0	2	38	-1.15428	-1.74231
0	2	39	-1.28028	-1.75768
0	2	40	-1.59801	-1.94059
0	2	41	-0.0846381	-0.984505
0	2	42	0.602438	-0.943656
0	2	43	-1.0146	-1.11321
0	2	44	-0.0692515	-0.886183
0	2	45	-1.45864	-1.49045
0	2	46	-0.806328	-0.866814
0	2	47	-0.160549	-0.574801
0	2	48	-0.0279176	-0.31597
0	2	49	-1.05634	-0.95739
0	2	50	1.54786	0.727303
0	2	51	-0.517873	-0.602378
0	2	52	-1.11112	-1.46038
0	2	53	1.72006	-0.159814
0	2	54	0.077057	0.0577699
0	2	55	-0.102932	-0.149567
0	2	56	-0.203168	-0.170809
0	2	57	-0.1984	-0.0528219
0	2	58	-0.469599	-0.15479
0	2	59	0.171949	0.245148
0	2	60	0.0365412	0.125235
0	2	61	0.0487625	0.070386
0	2	62	0.721906	-0.0647131
0	2	63	-0.0899292	0.00825937
0	2	64	0.0912378	0.118854
0	2	65	-0.236656	0.0788442
0	2	66	0.136986	-0.142993
0	2	67	1.43465	0.704312
0	2	68	1.64091	0.559663
0	2	69	0.952042	0.374093
0	2	70	2.18803	1.73628
0	2	71	0.530508	0.615606
0	2	72	0.519169	0.469617
0	2	73	1.28262	0.673047
0	2	74	1.13644	0.651863
0	2	75	1.04864	0.432828
0	2	76	0.77302	0.59612
0	2	77	0.599577	0.909422
0	2	78	0.857024	1.41802
0	2	79	1.08031	0.855198
0	2	80	0.574828	0.448754
0	2	81	0.713401	0.513316
0	2	82	1.22339	1.08588
0	2	83	0.665208	1.46918
0	2	84	1.78746	1.32032
0	2	85	1.61596	1.57052
0	2	86	2.00778	1.05704
0	2	87	0.0984216	0.790678
0	2	88	1.23847	1.29734
0	2	89	0.90223	0.997672
0	2	90	1.39706	1.48057
0	2	91	1.12405	1.4281
0	2	92	1.38006	1.20323
0	2	93	1.0146	0.661556
0	2	94	0.167031	0.57096
0	2	95	0.376256	0.911105
0	2	96	0.20506	0.245701
0	2	97	0.328234	0.513959
0	2	98	0.43946	0.727743
0	2	99	1.71535	0.628161
0	2	100	0.246931	0.324878
0	2	101	1.14929	0.219982
0	2	102	-0.272947	-0.569354
0	2	103	-0.113607	-0.16338
0	2	104	-0.195874	0.066634
0	2	105	-0.497677	-0.107708
0	2	106	-0.248065	-0.105792
0	2	107	1.32015	0.07629
0	2	108	0.61474	-0.303207
0	3	1	0.178066	0.704213
0	3	2	-0.761419	-0.840907
0	3	3	-0.459262	-0.305539
0	3	4	-0.368098	-0.383574
0	3	5	0.508505	0.393779
0	3	6	-0.165817	-0.114762
0	3	7	0.556796	0.365228
0	3	8	0.732203	0.37644
0	3	9	-0.199904	-0.368116
0	3	10	0.188494	0.0590936
0	3	11	0.259635	-0.0807105
0	3	12	-0.040542	-0.0770648
0	3	13	-0.857145	-0.914392
0	3	14	-0.435106	-0.607359
0	3	15	-0.913763	-0.7928
0	3	16	-1.30824	-1.33287
0	3	17	-0.939858	-1.20637
0	3	18	-1.08211	-1.02769
0	3	19	-0.916244	-1.09828
0	3	20	-1.11967	-1.21706
0	3	21	-1.00845	-1.16375
0	3	22	-1.683	-1.62784
0	3	23	-0.811889	-0.879965
0	3	24	-1.45441	-1.81797
0	3	25	-1.0701	-1.44247
0	3	26	-1.37938	-1.76766
0	3	27	-1.83506	-1.93146
0	3	28	-2.09275	-2.42381
0	3	29	-1.78389	-2.07591
0	3	30	-1.53458	-1.76965
0	3	31	-1.70479	-1.82338
0	3	32	-1.51624	-1.807
0	3	33	-1.74625	-2.15814
0	3	34	-1.55062	-2.12661
0	3	35	-1.1658	-1.61182
0	3	36	-1.75723	-2.07302
0	3	37	-1.56989	-1.99874
0	3	38	-1.21373	-1.53011
0	3	39	NaN	NaN
0	3	40	-1.8393	-1.92782
0	3	41	-1.84454	-1.5435
0	3	42	-0.39254	-1.06846
0	3	43	-0.416871	-1.13473
0	3	44	-0.349358	-0.451864
0	3	45	-0.521117	-0.754876
0	3	46	-0.340001	-0.668076
0	3	47	-0.114117	-0.373366
0	3	48	-0.640011	-0.827108
0	3	49	-0.446251	-0.70638
0	3	50	0.276471	-0.237945
0	3	51	0.613379	0.312528
0	3	52	1.45367	0.14138
0	3	53	0.0318858	-0.119437
0	3	54	0.423798	-0.107512
0	3	55	-0.474597	-0.223114
0	3	56	-0.472186	-0.29817
0	3	57	-0.443729	-0.118191
0	3	58	-0.545822	-0.492331
0	3	59	-0.181002	-0.0632027
0	3	60	1.28557	0.641942
0	3	61	0.824192	0.17794
0	3	62	0.468592	0.410385
0	3	63	-0.314953	-0.15324
0	3	64	-0.329364	-0.192413
0	3	65	-0.431008	-0.152003
0	3	66	-0.602496	-0.385965
0	3	67	-0.413171	-0.0448651
0	3	68	-0.47076	-0.52999
0	3	69	-0.818255	-0.112008
0	3	70	-0.419413	-0.0586447
0	3	71	-0.549249	0.375476
0	3	72	-0.951362	0.535489
0	3	73	0.304749	0.975024
0	3	74	0.054998	0.430383
0	3	75	-0.96212	0.0505171
0	3	76	0.0913205	0.512652
0	3	77	0.011592	1.30818
0	3	78	-0.0100072	0.441994
0	3	79	0.726518	0.834943
0	3	80	-0.0152332	0.606716
0	3	81	-0.0314391	0.779743
0	3	82	-0.10636	0.778386
0	3	83	-0.193287	1.13448
0	3	84	-0.145376	1.0873
0	3	85	NaN	NaN
0	3	86	-0.018515	0.920845
0	3	87	-0.226763	0.649246
0	3	88	-0.862906	0.144569
0	3	89	-0.281135	0.963704
0	3	90	-0.167862	0.800096
0	3	91	-0.0672634	0.813617
0	3	92	0.216788	0.624052
0	3	93	0.96407	1.02631
0	3	94	-0.171983	0.502468
0	3	95	0.847918	0.803386
0	3	96	0.441201	0.777678
0	3	97	-0.24051	0.612663
0	3	98	0.0220042	0.419329
0	3	99	0.815271	0.690635
0	3	100	0.628103	0.597856
0	3	101	0.463203	0.873788
0	3	102	-0.576417	-0.200795
0	3	103	-0.672277	-0.0743429
0	3	104	-0.0979819	0.327778
0	3	105	-0.435799	0.00184816
0	3	106	0.222825	0.305741
0	3	107	-1.01972	-0.636364
0	3	108	-0.333997	-0.0175545
0	4	1	0.893833	0.0872477
0	4	2	-0.0760149	-0.0455717
0	4	3	-0.142669	-0.138578
0	4	4	-0.301971	-0.0611235
0	4	5	-0.158893	0.0418683
0	4	6	-0.0688538	-0.0954755
0	4	7	0.0564931	-0.0277815
0	4	8	-0.0553191	0.263128
0	4	9	-0.0353131	0.127798
0	4	10	-0.325304	-0.0918122
0	4	11	-0.0505622	0.177653
0	4	12	-0.54707	-0.141985
0	4	13	-0.154159	-0.16479
0	4	14	-0.257774	-0.396019
0	4	15	-0.0733319	-0.69879
0	4	16	-0.668088	-0.733969
0	4	17	-0.957788	-0.67266
0	4	18	-0.272109	-0.958734
0	4	19	-0.5388	-0.765759
0	4	20	0.704938	-1.1012
0	4	21	-0.218262	-0.98939
0	4	22	0.888977	-1.10503
0	4	23	-0.695497	-1.26792
0	4	24	-0.83593	-1.35072
0	4	25	-1.86359	-1.92855
0	4	26	-1.32126	-1.31246
0	4	27	0.492876	-1.66451
0	4	28	-0.883113	-1.54728
0	4	29	-0.579459	-2.23173
0	4	30	-1.03178	-1.87636
0	4	31	-1.23916	-2.04778
0	4	32	0.154387	-1.45295
0	4	33	0.60738	-1.6452
0	4	34	-1.29079	-1.71856
0	4	35	-0.556385	-1.67269
0	4	36	-1.39993	-1.94843
0	4	37	-1.36698	-1.63883
0	4	38	0.677987	-1.33166
0	4	39	-1.30171	-1.07182
0	4	40	-0.820582	-1.30501
0	4	41	1.28914	-0.996714
0	4	42	1.26056	-0.803145
0	4	43	-1.12337	-0.714351
0	4	44	-0.720331	-0.894972
0	4	45	-0.927509	-0.866277
0	4	46	-0.594891	-0.495245
0	4	47	-0.24152	-0.280113
0	4	48	0.179128	-0.0824447
0	4	49	-0.459092	-0.248081
0	4	50	-0.645008	-0.212384
0	4	51	1.31515	-0.0974794
0	4	52	-0.240638	0.0637443
0	4	53	0.606415	-0.186959
0	4	54	0.0437467	0.111435
0	4	55	-0.966041	-0.540304
0	4	56	-0.515456	-0.0697228
0	4	57	-0.0986848	0.0454411
0	4	58	-0.483742	-0.253769
0	4	59	-0.140078	-0.184314
0	4	60	0.978134	-0.0156019
0	4	61	-0.100396	0.297885
0	4	62	-0.0294904	0.233714
0	4	63	0.0793071	0.346091
0	4	64	1.3326	0.00520163
0	4	65	0.195172	0.0486886
0	4	66	0.0979523	0.466932
0	4	67	0.911365	0.969711
0	4	68	-0.140199	0.301883
0	4	69	0.568848	0.467886
0	4	70	0.646934	0.334463
0	4	71	-0.126472	0.336752
0	4	72	0.946705	0.908308
0	4	73	1.53726	1.09807
0	4	74	0.266509	0.709741
0	4	75	0.172343	0.867069
0	4	76	1.00579	1.3265
0	4	77	-0.704316	1.04152
0	4	78	0.998688	0.804822
0	4	79	0.0939722	0.945558
0	4	80	0.59667	1.25452
0	4	81	1.39741	1.20878
0	4	82	-0.0152416	1.18406
0	4	83	-0.695987	0.777506
0	4	84	-0.661681	0.790057
0	4	85	0.10462	0.425267
0	4	86	-0.287603	1.10354
0	4	87	0.000331891	1.14263
0	4	88	0.164899	1.34543
0	4	89	-0.406272	0.822606
0	4	90	-0.0781586	0.847572
0	4	91	-0.63755	0.67401
0	4	92	0.481102	0.196568
0	4	93	-0.314907	0.584576
0	4	94	0.590379	1.02665
0	4	95	0.58583	0.593724
0	4	96	-0.461954	0.652258
0	4	97	-0.17268	0.76603
0	4	98	0.760792	0.726437
0	4	99	-0.0826938	0.636385
0	4	100	-0.295625	0.374816
0	4	101	-1.38097	-0.128779
0	4	102	-0.636984	0.132716
0	4	103	-0.790185	-0.138344
0	4	104	-0.89186	-0.583674
0	4	105	-0.114155	-0.531832
0	4	106	-0.310649	0.0442355
0	4	107	0.184026	-0.0279996
0	4	108	1.11648	-0.146015
0	5	1	-0.397489	-0.20325
0	5	2	-0.0469934	-0.0450246
0	5	3	0.430841	0.277822
0	5	4	-0.225143	-0.41078
0	5	5	-0.0820876	-0.0530884
0	5	6	-0.208343	-0.0437602
0	5	7	0.203303	0.335108
0	5	8	0.0987659	-0.0813629
0	5	9	0.119258	0.061675
0	5	10	0.177886	0.183974
0	5	11	0.348169	0.296941
0	5	12	0.363043	0.093887
0	5	13	-0.345203	-0.165979
0	5	14	-0.188235	-0.181117
0	5	15	-0.529664	-0.462617
0	5	16	-0.60988	-0.877118
0	5	17	-0.620056	-0.695337
0	5	18	-0.647516	-0.50158
0	5	19	-1.01576	-0.91618
0	5	20	-0.894494	-1.14188
0	5	21	-0.981036	-1.39608
0	5	22	-1.32726	-1.65077
0	5	23	-0.491847	-1.52072
0	5	24	-1.41669	-1.76418
0	5	25	-0.931223	-1.82773
0	5	26	-1.35069	-1.74917
0	5	27	-1.50198	-2.54017
0	5	28	-0.932898	-2.21337
0	5	29	-0.952323	-1.89801
0	5	30	-1.16825	-2.20769
0	5	31	-1.41762	-1.74937
0	5	32	-0.648209	-1.43318
0	5	33	-1.33233	-2.2347
0	5	34	-0.788536	-1.46205
0	5	35	-1.57158	-2.4139
0	5	36	-0.926283	-1.62687
0	5	37	-0.676312	-1.69176
0	5	38	-0.703099	-1.68504
0	5	39	-0.184699	-1.50733
0	5	40	-0.736723	-1.82366
0	5	41	-0.277045	-1.37195
0	5	42	-1.02199	-1.30083
0	5	43	-0.421246	-1.38082
0	5	44	0.0691473	-0.663237
0	5	45	-0.507888	-0.911873
0	5	46	-0.183948	-0.570611
0	5	47	-0.0321855	-0.398654
0	5	48	-0.0105476	-0.343255
0	5	49	0.682051	-0.37117
0	5	50	0.275093	-0.166372
0	5	51	0.0784536	-0.296995
0	5	52	1.05695	-0.212454
0	5	53	0.489891	-0.00853782
0	5	54	0.865097	0.281207
0	5	55	-0.415114	-0.0909783
0	5	56	0.452685	-0.0960317
0	5	57	0.0033121	0.0818969
0	5	58	-0.0173443	0.157364
0	5	59	-0.394633	-0.150933
0	5	60	-0.508629	-0.0319992
0	5	61	0.111009	-0.0148874
0	5	62	-0.00487776	-0.0515357
0	5	63	0.510764	0.35493
0	5	64	0.222577	-0.14955
0	5	65	0.819662	0.220446
0	5	66	-0.167537	-0.193127
0	5	67	1.26386	0.737897
0	5	68	0.415873	0.0274444
0	5	69	-0.648807	-0.164396
0	5	70	0.335801	0.370601
0	5	71	0.113457	0.141593
0	5	72	0.310295	0.514733
0	5	73	-0.226476	0.623311
0	5	74	1.05745	0.706473
0	5	75	0.800336	0.576974
0	5	76	0.285868	0.827682
0	5	77	1.14195	1.12407
0	5	78	0.303425	0.785317
0	5	79	0.949169	1.35839
0	5	80	1.65902	1.48964
0	5	81	0.805758	0.954436
0	5	82	0.820742	0.863195
0	5	83	0.378416	0.822313
0	5	84	0.850684	1.47558
0	5	85	1.36123	1.42468
0	5	86	1.30315	1.29945
0	5	87	0.284213	0.413181
0	5	88	1.59529	1.49828
0	5	89	1.28422	1.42281
0	5	90	0.50205	1.23665
0	5	91	0.418967	1.04823
0	5	92	0.649871	0.951157
0	5	93	0.440286	1.27003
0	5	94	1.15445	1.47895
0	5	95	1.59685	1.62722
0	5	96	1.42783	1.45024
0	5	97	0.557193	0.611234
0	5	98	0.510466	0.883211
0	5	99	0.493611	0.476179
0	5	100	-0.807405	-0.0135179
0	5	101	0.479808	0.411688
0	5	102	0.379401	0.128485
0	5	103	-0.0583894	0.0773513
0	5	104	-0.684006	-0.333728
0	5	105	0.12173	0.0640854
0	5	106	-0.875826	-0.235067
0	5	107	-0.659809	-0.406624
0	5	108	-0.308653	-0.300155
0	6	1	-0.782082	-0.438328
0	6	2	0.859305	0.023708
0	6	3	0.152841	-0.316468
0	6	4	0.0183723	0.145708
0	6	5	0.225564	0.211274
0	6	6	0.675337	0.0548602
0	6	7	-0.136408	0.158057
0	6	8	-0.267034	-0.132589
0	6	9	-0.266221	0.174283
0	6	10	-0.273751	-0.212374
0	6	11	0.624573	0.380095
0	6	12	-0.903934	-0.228367
0	6	13	-0.736701	-0.227368
0	6	14	-0.976492	-0.439593
0	6	15	-1.80148	-1.15145
0	6	16	-1.38684	-0.73137
0	6	17	-1.61223	-0.806375
0	6	18	-1.54903	-1.1272
0	6	19	-1.77805	-0.996531
0	6	20	-2.15259	-1.28045
0	6	21	-0.531283	-1.35891
0	6	22	-2.28197	-1.64239
0	6	23	-2.47969	-1.71992
0	6	24	-2.63198	-1.67645
0	6	25	-2.27317	-1.74587
0	6	26	-2.11089	-1.82156
0	6	27	-2.6475	-1.67948
0	6	28	-2.60032	-1.90996
0	6	29	-3.46459	-2.09067
0	6	30	-2.70871	-2.20693
0	6	31	-3.56394	-2.53917
0	6	32	-1.14658	-0.604889
0	6	33	-2.86423	-1.84424
0	6	34	-2.74559	-0.35163
0	6	35	-2.19046	-1.51226
0	6	36	0.501972	-1.05462
0	6	37	-1.65856	-1.44873
0	6	38	-1.49816	-1.06744
0	6	39	-2.43935	-1.48953
0	6	40	-1.68129	-1.91829
0	6	41	-2.25406	-1.80864
0	6	42	-2.20454	-1.17861
0	6	43	-1.36942	-0.875275
0	6	44	-1.48291	-0.723816
0	6	45	-1.30413	-0.84591
0	6	46	-1.29998	-0.805185
0	6	47	-1.2727	-0.569693
0	6	48	-1.32619	-0.708957
0	6	49	-1.99969	-0.920465
0	6	50	-1.2304	-0.247584
0	6	51	-1.31707	-0.0494742
0	6	52	-1.14662	-0.133755
0	6	53	-1.00833	-0.399662
0	6	54	-0.423322	-0.162468
0	6	55	1.25168	0.92781
0	6	56	-1.02778	-0.539663
0	6	57	0.221327	0.0325097
0	6	58	-0.162132	0.334504
0	6	59	0.406454	-0.272298
0	6	60	-0.689653	-0.322205
0	6	61	0.16478	-0.338598
0	6	62	0.225455	0.211141
0	6	63	0.22767	-0.33995
0	6	64	-0.408686	0.0113675
0	6	65	0.0809751	0.373189
0	6	66	0.0385119	0.354042
0	6	67	-0.452172	-0.145612
0	6	68	-0.100123	0.168612
0	6	69	-0.483241	-0.151197
0	6	70	-0.672702	-0.113691
0	6	71	-0.525736	0.274833
0	6	72	-0.737701	0.470277
0	6	73	-0.594127	0.275468
0	6	74	-0.498437	0.435939
0	6	75	-0.241655	0.441647
0	6	76	0.196556	0.634494
0	6	77	-0.334986	0.378705
0	6	78	0.201386	0.478784
0	6	79	-0.100352	0.573767
0	6	80	-0.465646	0.75781
0	6	81	-0.216905	1.19369
0	6	82	-1.3315	0.486428
0	6	83	-0.102091	0.840977
0	6	84	-0.559199	0.982926
0	6	85	0.417277	1.12244
0	6	86	-0.171731	1.07888
0	6	87	0.411591	1.23691
0	6	88	-0.0292898	1.02648
0	6	89	0.0606823	0.734611
0	6	90	-0.450699	0.884749
0	6	91	-0.636012	0.136917
0	6	92	-0.287881	0.85279
0	6	93	0.178775	0.756127
0	6	94	-0.652866	0.604557
0	6	95	0.111822	0.809919
0	6	96	-0.0518955	0.866119
0	6	97	-0.233453	0.858968
0	6	98	-0.608962	0.815873
0	6	99	0.28889	0.617326
0	6	100	-0.0907381	0.443535
0	6	101	-0.285586	0.300002
0	6	102	-0.330687	0.154973
0	6	103	0.0977699	0.497
0	6	104	0.218498	0.0949365
0	6	105	-0.727081	-0.0455474
0	6	106	-0.47267	0.0797693
0	6	107	-0.316217	0.39009
0	6	108	-0.946426	-0.0155154
0	7	1	-0.491585	0.216453
0	7	2	-0.523576	-0.368174
0	7	3	0.433877	0.342304
0	7	4	-0.548555	-0.0235292
0	7	5	0.489085	0.0597549
0	7	6	-0.424797	-0.175724
0	7	7	0.931931	0.227632
0	7	8	0.0646326	-0.0794864
0	7	9	0.212872	0.0681462
0	7	10	-0.00185681	-0.138091
0	7	11	-0.101793	-0.0203457
0	7	12	0.0678981	0.0573041
0	7	13	0.00229051	0.00946779
0	7	14	-0.583459	-0.579466
0	7	15	-0.847182	-0.48383
0	7	16	0.669357	-0.509572
0	7	17	-0.345163	-0.774967
0	7	18	-0.431601	-0.665861
0	7	19	-0.52422	-0.895197
0	7	20	-1.07453	-0.875111
0	7	21	-0.856122	-0.938999
0	7	22	-1.95415	-1.48536
0	7	23	-0.730596	-1.29009
0	7	24	-1.73143	-1.528
0	7	25	-0.762929	-1.85884
0	7	26	-1.14958	-1.41961
0	7	27	-1.38431	-1.47707
0	7	28	0.143371	-0.986233
0	7	29	-1.28224	-1.14227
0	7	30	-0.909094	-1.6407
0	7	31	-1.682	-1.42026
0	7	32	-1.8405	-1.46105
0	7	33	-2.16454	-1.49012
0	7	34	-1.45507	-1.6267
0	7	35	-1.03185	-1.88547
0	7	36	-0.717922	-1.10738
0	7	37	-1.28441	-1.44716
0	7	38	-0.751194	-1.22812
0	7	39	-1.29827	-1.20837
0	7	40	-0.956282	-1.02801
0	7	41	-1.19503	-1.13972
0	7	42	-1.02012	-0.777941
0	7	43	-1.25811	-0.887525
0	7	44	-0.826701	-0.703481
0	7	45	-0.357938	-0.756519
0	7	46	0.151057	-0.29136
0	7	47	-0.614992	-0.252602
0	7	48	0.0549936	-0.390995
0	7	49	0.767099	0.300032
0	7	50	0.41579	0.123144
0	7	51	0.439174	-0.0270136
0	7	52	-0.383353	-0.233663
0	7	53	0.835707	0.356821
0	7	54	0.699707	0.275794
0	7	55	-0.698703	-0.26756
0	7	56	0.053875	-0.832283
0	7	57	0.442116	-0.0234864
0	7	58	0.602519	0.271614
0	7	59	-0.0483127	0.0890814
0	7	60	0.843103	0.15542
0	7	61	-0.284591	0.261819
0	7	62	0.384216	0.645301
0	7	63	-0.575099	-0.320468
0	7	64	-0.536991	-0.0255268
0	7	65	0.766882	0.381634
0	7	66	0.338265	0.36422
0	7	67	-0.30274	0.0512963
0	7	68	-0.0824425	0.405917
0	7	69	0.026725	0.759412
0	7	70	-0.4477	0.260806
0	7	71	-0.605136	0.249527
0	7	72	-0.160401	0.441527
0	7	73	-0.338009	0.578561
0	7	74	0.551751	0.892756
0	7	75	0.102797	0.441779
0	7	76	-0.202072	0.513668
0	7	77	0.315328	0.697446
0	7	78	-0.135013	0.661569
0	7	79	-0.0915366	0.939685
0	7	80	-0.418051	0.746425
0	7	81	0.352617	0.768135
0	7	82	1.12549	1.53955
0	7	83	0.338385	1.06188
0	7	84	0.298742	1.10356
0	7	85	0.543051	1.26161
0	7	86	-0.118926	1.03646
0	7	87	0.117364	0.753189
0	7	88	-0.0551784	1.40803
0	7	89	0.112978	1.0252
0	7	90	0.480724	1.33782
0	7	91	0.056986	1.04693
0	7	92	0.623158	1.16746
0	7	93	0.192292	0.83376
0	7	94	-0.108688	0.954323
0	7	95	0.358554	1.07354
0	7	96	0.906776	1.4395
0	7	97	-0.773719	0.217208
0	7	98	0.805781	0.967435
0	7	99	0.320987	0.685634
0	7	100	-0.260767	0.363066
0	7	101	-0.608627	-0.0701255
0	7	102	-0.123482	-0.1742
0	7	103	-0.474184	0.34669
0	7	104	-0.195991	0.200182
0	7	105	-0.823516	-0.0887137
0	7	106	-1.27542	-0.275242
0	7	107	-0.448055	0.121503
0	7	108	-0.936137	-0.154975
0	8	1	0.68885	0.507989
0	8	2	1.12023	0.0603025
0	8	3	-0.546428	-0.116492
0	8	4	1.11422	0.639152
0	8	5	-0.269633	0.0404899
0	8	6	-0.556423	-0.385704
0	8	7	-0.101328	-0.0266768
0	8	8	-0.412784	-0.321161
0	8	9	-0.259352	0.248208
0	8	10	-0.696318	-0.596163
0	8	11	-0.324633	-0.10149
0	8	12	-0.543894	-0.215563
0	8	13	-1.24363	-0.575192
0	8	14	-0.0307703	-0.446873
0	8	15	-1.10309	-0.924352
0	8	16	-1.70381	-0.782725
0	8	17	-1.78416	-1.07415
0	8	18	-1.19611	-0.745103
0	8	19	0.0166193	-0.970746
0	8	20	-0.689878	-0.813462
0	8	21	-1.73146	-1.1676
0	8	22	-1.46853	-1.44777
0	8	23	-1.67043	-1.18069
0	8	24	-1.39427	-1.27475
0	8	25	-1.36197	-1.80374
0	8	26	-1.63668	-1.6802
0	8	27	-1.75975	-1.55944
0	8	28	-1.30265	-1.30378
0	8	29	-1.66808	-1.93657
0	8	30	-1.98954	-1.70905
0	8	31	-2.11867	-1.59178
0	8	32	-2.51912	-2.01466
0	8	33	-2.13953	-2.26128
0	8	34	-2.57408	-1.87908
0	8	35	-2.53441	-1.84302
0	8	36	-2.45095	-1.77354
0	8	37	-1.99082	-1.55195
0	8	38	-2.1403	-1.58646
0	8	39	-2.03947	-1.64298
0	8	40	-0.819627	-1.17211
0	8	41	-1.23959	-0.977757
0	8	42	-0.726615	-0.81992
0	8	43	-0.0957288	-0.351798
0	8	44	0.896188	0.0310806
0	8	45	-0.115415	-0.311476
0	8	46	-0.128055	-0.473395
0	8	47	-0.199614	-0.262379
0	8	48	-0.256274	-0.286556
0	8	49	0.906434	0.259467
0	8	50	-0.29966	-0.229828
0	8	51	-0.000105811	0.18578
0	8	52	0.840742	0.0504508
0	8	53	0.698349	0.350146
0	8	54	0.867778	0.495128
0	8	55	-1.17609	-0.672954
0	8	56	0.00493811	-0.154892
0	8	57	0.349435	-0.00763824
0	8	58	0.350326	-0.238748
0	8	59	0.191725	0.0798686
0	8	60	-0.0147604	0.111341
0	8	61	0.289279	0.419751
0	8	62	0.0444284	0.209594
0	8	63	-0.268904	-0.00597122
0	8	64	0.365633	0.401224
0	8	65	-0.343851	0.00803681
0	8	66	-0.237923	-0.201708
0	8	67	0.16433	0.351037
0	8	68	0.991945	0.767323
0	8	69	0.286439	0.574128
0	8	70	0.269043	0.680368
0	8	71	1.16784	1.05309
0	8	72	1.11093	1.06423
0	8	73	0.945438	0.832055
0	8	74	1.09717	1.03539
0	8	75	0.886884	1.10267
0	8	76	0.530083	1.20392
0	8	77	0.89254	1.6405
0	8	78	0.911457	1.58055
0	8	79	1.14897	1.52425
0	8	80	1.51993	1.96833
0	8	81	0.0147807	0.758815
0	8	82	0.961777	1.54852
0	8	83	0.891502	1.11226
0	8	84	1.16851	1.41569
0	8	85	1.03255	1.62634
0	8	86	1.03488	1.64169
0	8	87	0.985687	1.26953
0	8	88	1.52374	2.1816
0	8	89	0.146943	1.62319
0	8	90	0.538309	1.21544
0	8	91	1.59533	2.17068
0	8	92	0.616771	1.25666
0	8	93	1.1722	1.50567
0	8	94	0.49799	1.14797
0	8	95	1.07785	1.54846
0	8	96	0.592837	1.02263
0	8	97	0.0972737	0.863798
0	8	98	0.65448	0.860205
0	8	99	0.607001	1.01257
0	8	100	-0.0150393	0.666522
0	8	101	-0.112999	0.704643
0	8	102	-0.525166	-0.221417
0	8	103	-1.00058	-0.00699368
0	8	104	0.228968	0.144784
0	8	105	-0.319098	0.0840175
0	8	106	-0.226393	0.22014
0	8	107	-0.203411	0.403321
0	8	108	-0.683505	0.0790309
0	9	1	0.113564	0.117014
0	9	2	0.125714	0.0609753
0	9	3	-0.495483	-0.343164
0	9	4	0.0697278	0.259931
0	9	5	-0.491302	-0.215911
0	9	6	0.334309	0.103623
0	9	7	-0.43827	-0.20178
0	9	8	0.0365016	-0.259884
0	9	9	0.548547	0.317081
0	9	10	0.236034	0.179946
0	9	11	-0.196105	-0.229651
0	9	12	-0.82608	-0.382034
0	9	13	-0.471372	-0.241351
0	9	14	-1.71539	-1.22397
0	9	15	-1.00666	-0.660463
0	9	16	-1.25762	-1.29363
0	9	17	-0.87114	-0.812791
0	9	18	0.166358	-0.482293
0	9	19	-1.14681	-0.864339
0	9	20	-1.16373	-1.01345
0	9	21	-1.33812	-1.26662
0	9	22	-0.83669	-1.01861
0	9	23	-1.58407	-1.4134
0	9	24	-1.23513	-1.55415
0	9	25	-2.37673	-2.27463
0	9	26	-1.8177	-1.66546
0	9	27	-1.15992	-1.56571
0	9	28	-0.914102	-1.36743
0	9	29	-1.23453	-1.48013
0	9	30	0.302137	-1.51217
0	9	31	-1.2483	-1.4213
0	9	32	-1.71162	-1.69365
0	9	33	-1.08268	-1.684
0	9	34	-0.966931	-1.46199
0	9	35	-1.50859	-1.51878
0	9	36	-1.57273	-2.03716
0	9	37	-0.898886	-1.69621
0	9	38	-0.813737	-0.955386
0	9	39	-0.903768	-1.32588
0	9	40	-0.590124	-1.12784
0	9	41	-1.15511	-1.39729
0	9	42	-0.297339	-0.856249
0	9	43	-0.23029	-0.766785
0	9	44	-0.278287	-0.726458
0	9	45	0.015045	-0.772904
0	9	46	-0.017259	-0.557084
0	9	47	-0.130324	-0.560274
0	9	48	0.115573	-0.677368
0	9	49	0.459019	-0.339456
0	9	50	0.158234	-0.169285
0	9	51	0.0672422	-0.225249
0	9	52	0.459924	-0.213648
0	9	53	0.831826	-0.141461
0	9	54	0.646343	-0.197198
0	9	55	0.073582	0.120229
0	9	56	-0.351312	-0.286073
0	9	57	0.116878	0.113261
0	9	58	0.490145	0.0478705
0	9	59	0.398648	0.335146
0	9	60	-0.19281	-0.0548206
0	9	61	-0.185785	0.122642
0	9	62	-0.396329	-0.298721
0	9	63	0.503816	0.203079
0	9	64	-0.285108	-0.249327
0	9	65	-0.5152	-0.225277
0	9	66	-0.45156	-0.279064
0	9	67	0.0627415	0.0757886
0	9	68	0.543904	0.490755
0	9	69	0.594009	0.643692
0	9	70	1.43718	0.428124
0	9	71	0.293084	0.430586
0	9	72	0.234198	0.836669
0	9	73	0.450167	0.8664
0	9	74	0.687775	0.477
0	9	75	1.67131	1.17156
0	9	76	1.31817	1.14127
0	9	77	0.908905	0.931813
0	9	78	0.242535	1.3287
0	9	79	1.07719	1.5522
0	9	80	0.737805	1.3263
0	9	81	1.17595	1.65716
0	9	82	1.33434	2.05234
0	9	83	1.60458	1.9948
0	9	84	0.148586	1.37119
0	9	85	1.61262	1.69537
0	9	86	0.692208	1.45014
0	9	87	1.29242	1.8143
0	9	88	1.14909	1.52934
0	9	89	1.24948	1.9572
0	9	90	1.0032	1.50463
0	9	91	0.727105	1.22934
0	9	92	0.030209	0.879128
0	9	93	-0.264819	0.807558
0	9	94	0.992283	1.03406
0	9	95	-0.350223	0.549986
0	9	96	0.989265	1.27961
0	9	97	0.368608	1.09024
0	9	98	0.40023	0.735164
0	9	99	-0.446581	0.415032
0	9	100	-0.381628	0.555658
0	9	101	-1.01399	-0.048831
0	9	102	-0.327462	-0.00203266
0	9	103	-1.24327	-0.343888
0	9	104	-0.162722	0.191203
0	9	105	-0.861556	-0.126658
0	9	106	-0.77758	-0.07116
0	9	107	0.191278	0.110363
0	9	108	-0.786639	-0.316422
0	10	1	-0.44153	-0.151928
0	10	2	0.224888	0.125536
0	10	3	0.361286	-0.117861
0	10	4	0.463018	0.0505308
0	10	5	0.534765	-0.114765
0	10	6	0.11615	0.0627858
0	10	7	0.0580054	0.0304589
0	10	8	-0.461987	-0.0836354
0	10	9	-0.430562	0.118152
0	10	10	-0.278721	0.0411288
0	10	11	0.126225	0.266024
0	10	12	0.0182422	-0.172109
0	10	13	-0.338363	-0.375644
0	10	14	-1.22196	-0.539319
0	10	15	-0.613084	-0.457232
0	10	16	-0.63225	-0.581544
0	10	17	-0.533504	-0.691305
0	10	18	-0.858689	-0.961451
0	10	19	-0.842013	-1.03701
0	10	20	-1.34416	-1.15949
0	10	21	-1.29735	-1.25888
0	10	22	-0.0713335	-1.40162
0	10	23	-0.762189	-1.31997
0	10	24	-1.72341	-1.6261
0	10	25	-0.807693	-1.64497
0	10	26	-1.53962	-1.72837
0	10	27	-2.01421	-1.68173
0	10	28	-1.02611	-1.6217
0	10	29	-1.53867	-1.86304
0	10	30	-1.05854	-1.33676
0	10	31	-1.23048	-1.71242
0	10	32	-1.56272	-1.70799
0	10	33	-1.24611	-1.82929
0	10	34	-1.55912	-1.76737
0	10	35	-0.946643	-1.69765
0	10	36	-0.432355	-1.68398
0	10	37	-1.47116	-1.51495
0	10	38	-0.553776	-1.21819
0	10	39	-1.3981	-1.40202
0	10	40	-1.05742	-1.06604
0	10	41	-0.81235	-0.910265
0	10	42	-0.191246	-0.944699
0	10	43	-0.641169	-0.870574
0	10	44	-0.213823	-0.707988
0	10	45	0.469552	-0.478747
0	10	46	0.159283	-0.369423
0	10	47	-0.235311	-0.316401
0	10	48	0.448867	-0.315874
0	10	49	0.645332	0.118846
0	10	50	0.167873	-0.120951
0	10	51	0.872389	0.0108128
0	10	52	0.122332	-0.0434443
0	10	53	0.69922	-0.00983543
0	10	54	0.551877	0.120041
0	10	55	0.178502	-0.0101915
0	10	56	-0.0453552	0.0417135
0	10	57	0.0185631	0.137357
0	10	58	0.825174	0.0684067
0	10	59	-0.284335	-0.0898037
0	10	60	-0.704252	-0.234621
0	10	61	0.515135	0.165164
0	10	62	-0.357834	-0.228659
0	10	63	0.27226	0.00510619
0	10	64	-0.314954	0.0689737
0	10	65	0.879073	0.300016
0	10	66	0.127487	-0.111632
0	10	67	0.134118	0.298748
0	10	68	0.330033	0.418513
0	10	69	-0.289651	0.364822
0	10	70	0.547858	0.555251
0	10	71	0.290736	0.791238
0	10	72	0.774082	0.506368
0	10	73	1.22509	0.902002
0	10	74	1.19611	0.89031
0	10	75	1.01503	1.1325
0	10	76	1.40266	1.47585
0	10	77	1.71039	1.21469
0	10	78	1.80902	1.35091
0	10	79	0.563832	1.5402
0	10	80	1.70025	1.77748
0	10	81	1.17876	1.59438
0	10	82	1.79722	1.85197
0	10	83	1.45776	1.56598
0	10	84	1.51952	1.69336
0	10	85	1.24105	1.64118
0	10	86	1.24138	2.02546
0	10	87	1.14138	1.49243
0	10	88	1.403	1.47623
0	10	89	1.26761	1.3132
0	10	90	1.467	1.52958
0	10	91	1.05839	1.45918
0	10	92	0.915178	1.21758
0	10	93	1.11927	1.17068
0	10	94	0.739038	1.20084
0	10	95	0.762262	1.10525
0	10	96	1.01624	1.02408
0	10	97	0.704905	0.767468
0	10	98	1.00984	0.719529
0	10	99	0.576687	0.966883
0	10	100	-0.12504	0.580983
0	10	101	0.912539	0.282615
0	10	102	0.0202533	-0.0443784
0	10	103	0.303698	0.375466
0	10	104	-0.925284	-0.249291
0	10	105	-0.272948	-0.0285541
0	10	106	0.367281	0.191832
0	10	107	0.0590499	-0.172135
0	10	108	0.180359	0.194148
1	1	1	0.202212	0.534418
1	1	2	-1.68376	-0.598564
1	1	3	-1.11132	-1.08392
1	1	4	-0.558507	-0.0707895
1	1	5	0.367931	-0.0502586
1	1	6	0.268263	-0.0916951
1	1	7	-0.39049	-0.250144
1	1	8	0.109775	0.309114
1	1	9	1.54792	0.446443
1	1	10	1.30596	0.845561
1	1	11	-0.388528	0.0310864
1	1	12	1.20042	0.939153
1	1	13	-0.00345129	0.264736
1	1	14	0.246129	-0.505906
1	1	15	-0.711729	-0.384174
1	1	16	0.0813984	-0.292201
1	1	17	-0.345642	-0.666025
1	1	18	-0.502736	0.191553
1	1	19	0.169985	-0.60185
1	1	20	0.220272	-0.0876301
1	1	21	0.224705	-0.0188049
1	1	22	0.680765	0.0333078
1	1	23	-0.122219	-1.06581
1	1	24	-0.671049	-0.816911
1	1	25	-1.39049	-1.16948
1	1	26	-1.73048	-1.3599
1	1	27	0.302661	-0.282459
1	1	28	0.151941	-0.600718
1	1	29	-0.804851	-0.620352
1	1	30	-1.41615	-1.62398
1	1	31	-0.309423	-1.43222
1	1	32	-1.0231	-1.58891
1	1	33	-0.967772	-1.7045
1	1	34	-1.32416	-1.05857
1	1	35	-0.956273	-1.21379
1	1	36	0.357075	-0.853429
1	1	37	-0.0587384	-1.10362
1	1	38	-1.41637	-1.20721
1	1	39	-0.891863	-1.28023
1	1	40	1.32352	-0.300695
1	1	41	1.25356	-0.454549
1	1	42	0.97758	-0.148841
1	1	43	1.0419	-0.301279
1	1	44	0.717276	-0.263419
1	1	45	0.312281	-0.39408
1	1	46	0.0751002	-0.713873
1	1	47	0.748809	0.0616371
1	1	48	0.906644	-0.344005
1	1	49	0.677851	0.181629
1	1	50	0.472554	-0.646069
1	1	51	1.37894	0.15051
1	1	52	0.631602	0.504497
1	1	53	0.977244	0.000990419
1	1	54	1.34283	0.257143
1	1	55	0.101622	-0.0641234
1	1	56	0.982845	0.497349
1	1	57	-1.30995	-0.295722
1	1	58	1.10179	0.0158074
1	1	59	0.561108	-0.0646966
1	1	60	-0.683331	0.0205769
1	1	61	-1.74954	-0.840387
1	1	62	0.109064	-0.072299
1	1	63	1.11602	0.268699
1	1	64	0.143158	-0.0720166
1	1	65	-1.6981	-1.00961
1	1	66	-1.42295	-0.62776
1	1	67	0.0300322	-0.116388
1	1	68	0.757322	0.840454
1	1	69	-1.08608	0.128841
1	1	70	0.769289	0.737525
1	1	71	0.398568	0.450271
1	1	72	0.207806	0.207704
1	1	73	-0.963362	0.221838
1	1	74	0.698324	0.578425
1	1	75	0.428475	0.945304
1	1	76	1.04357	0.832065
1	1	77	0.444986	0.495206
1	1	78	1.00734	1.31758
1	1	79	-0.173595	0.677952
1	1	80	-0.290041	0.921232
1	1	81	0.257653	1.05157
1	1	82	-0.282559	0.137842
1	1	83	-0.563402	1.13056
1	1	84	-0.0540306	0.782827
1	1	85	0.0296414	1.59147
1	1	86	0.480971	0.892502
1	1	87	-0.507873	0.537557
1	1	88	-0.752456	1.13303
1	1	89	0.544185	0.912668
1	1	90	0.833474	1.16349
1	1	91	-0.0326039	0.796658
1	1	92	-0.708137	1.12396
1	1	93	-0.697987	1.7564
1	1	94	0.444066	0.659961
1	1	95	0.687844	1.66367
1	1	96	0.328238	1.14323
1	1	97	-0.531369	0.597232
1	1	98	-0.437265	0.772305
1	1	99	-0.249689	0.598127
1	1	100	0.21668	-0.0259273
1	1	101	-0.146428	0.733746
1	1	102	-0.488093	-0.284746
1	1	103	-0.109053	0.12493
1	1	104	-0.166586	-0.0593529
1	1	105	0.298145	0.346407
1	1	106	-0.843842	-0.127462
1	1	107	0.180489	0.89924
1	1	108	-0.594024	0.523866
1	2	1	-0.252825	0.339452
1	2	2	-0.3378	-0.813385
1	2	3	1.17958	1.42719
1	2	4	-0.538072	-0.881547
1	2	5	1.52466	1.35675
1	2	6	0.394883	0.470242
1	2	7	-0.186352	-0.0932306
1	2	8	-0.513086	-0.429762
1	2	9	-0.93066	-1.21822
1	2	10	-0.475548	-0.2784
1	2	11	0.867798	0.271435
1	2	12	-0.152856	-0.269091
1	2	13	0.570448	-0.0230615
1	2	14	-1.08571	-1.16328
1	2	15	-1.21214	-1.5126
1	2	16	-0.736423	-1.32005
1	2	17	-0.943221	-1.49642
1	2	18	-0.108897	-0.881786
1	2	19	-0.267677	-0.773385
1	2	20	0.451393	-0.245942
1	2	21	-1.38902	-2.21287
1	2	22	-1.36683	-1.3334
1	2	23	-2.37745	-3.50931
1	2	24	-1.69909	-2.40754
1	2	25	-2.24263	-4.37808
1	2	26	-1.2561	-1.62277
1	2	27	-0.446114	-1.2163
1	2	28	-1.07668	-1.78218
1	2	29	-1.00247	-1.14287
1	2	30	-0.245849	-0.761359
1	2	31	-1.13678	-1.85031
1	2	32	-1.28492	-2.21202
1	2	33	-1.37371	-2.18479
1	2	34	-2.02272	-2.10159
1	2	35	-1.58236	-3.00425
1	2	36	-1.73986	-3.11219
1	2	37	-0.987766	-0.876082
1	2	38	-0.607469	-0.958317
1	2	39	-0.208488	-1.26132
1	2	40	-0.707086	-1.12042
1	2	41	-0.940606	-1.21392
1	2	42	-1.14263	-2.03325
1	2	43	-0.897559	-1.2628
1	2	44	-0.735907	-0.799799
1	2	45	-0.765759	-1.13284
1	2	46	-0.338376	-0.664402
1	2	47	-0.678209	-1.0397
1	2	48	-1.3091	-1.54545
1	2	49	0.299814	-0.39246
1	2	50	-0.662517	-0.565173
1	2	51	0.262575	-0.778529
1	2	52	-1.47172	-1.59657
1	2	53	-0.173892	-1.36174
1	2	54	-0.753221	-0.612554
1	2	55	-0.0819005	-0.207213
1	2	56	0.589078	-0.0855996
1	2	57	0.103668	0.307152
1	2	58	0.212776	-0.00711059
1	2	59	-0.880884	-0.563732
1	2	60	-0.543667	-0.230807
1	2	61	-0.323123	-0.106999
1	2	62	0.615203	0.186325
1	2	63	0.642005	0.158842
1	2	64	-0.502594	-0.191889
1	2	65	0.205913	-0.617177
1	2	66	2.33949	1.17341
1	2	67	2.77321	1.91678
1	2	68	1.4528	0.610704
1	2	69	1.75542	1.28538
1	2	70	0.911971	0.178399
1	2	71	1.86382	1.16259
1	2	72	2.55887	0.49851
1	2	73	1.43597	1.11312
1	2	74	2.19054	1.83279
1	2	75	2.17732	0.85265
1	2	76	1.84327	0.656346
1	2	77	1.55893	1.53881
1	2	78	1.48225	0.667215
1	2	79	1.64839	1.00627
1	2	80	1.68339	1.18591
1	2	81	1.49543	0.940763
1	2	82	2.33729	0.486005
1	2	83	0.913675	0.535482
1	2	84	2.41469	0.815685
1	2	85	1.72873	1.26537
1	2	86	2.19831	1.20509
1	2	87	2.51937	2.1496
1	2	88	1.25881	0.487092
1	2	89	0.887725	0.948389
1	2	90	1.72987	1.52689
1	2	91	1.61853	0.615591
1	2	92	2.58749	1.51246
1	2	93	2.62045	1.02605
1	2	94	2.45434	1.58886
1	2	95	1.3867	0.396567
1	2	96	1.44382	1.75205
1	2	97	1.13727	0.474098
1	2	98	1.61411	0.756468
1	2	99	0.958079	0.307133
1	2	100	1.64613	0.652477
1	2	101	2.23434	1.5411
1	2	102	1.05911	0.249164
1	2	103	1.53819	0.837739
1	2	104	2.19133	0.677569
1	2	105	0.701008	0.121388
1	2	106	1.11943	0.25849
1	2	107	2.48757	0.909327
1	2	108	2.11006	0.703301
1	3	1	-0.140517	-0.0447415
1	3	2	-0.768489	-0.903974
1	3	3	0.738117	0.927467
1	3	4	0.423713	0.193369
1	3	5	-0.11741	-0.28574
1	3	6	-0.535109	-0.476135
1	3	7	0.0133374	0.230413
1	3	8	0.559162	-0.0345669
1	3	9	0.236802	0.188866
1	3	10	-0.24921	-0.344955
1	3	11	1.01703	0.208173
1	3	12	0.951065	0.64305
1	3	13	0.286379	0.267907
1	3	14	-0.180322	-0.353447
1	3	15	0.0278799	0.0195261
1	3	16	-0.374817	-0.956828
1	3	17	-0.364157	-0.567059
1	3	18	-0.0946757	-0.188797
1	3	19	-0.236168	-0.41301
1	3	20	-0.412252	-0.79572
1	3	21	-0.683877	-0.949557
1	3	22	-0.0980857	-0.951539
1	3	23	0.807426	-0.258263
1	3	24	-0.515003	-0.63335
1	3	25	0.216868	-0.710685
1	3	26	-0.775144	-1.58819
1	3	27	-0.371462	-0.631908
1	3	28	-0.130967	-0.734655
1	3	29	0.494281	-0.626706
1	3	30	-0.178413	-1.06001
1	3	31	-0.504788	-1.00071
1	3	32	-0.151065	-1.10348
1	3	33	-0.37045	-1.29133
1	3	34	-0.442806	-1.13672
1	3	35	-0.238506	-0.975013
1	3	36	-0.570758	-1.01996
1	3	37	-0.0609469	-0.505666
1	3	38	-0.411862	-0.851762
1	3	39	-0.740751	-1.35946
1	3	40	-0.317742	-1.12691
1	3	41	0.991547	-0.38878
1	3	42	0.926472	-0.613668
1	3	43	-0.228339	-0.596868
1	3	44	0.0585801	-0.595709
1	3	45	1.0066	-0.499315
1	3	46	-0.389684	-0.584529
1	3	47	0.504247	-0.170644
1	3	48	1.03312	-0.100133
1	3	49	0.623166	0.00443741
1	3	50	0.685726	0.0568635
1	3	51	0.62575	0.0799683
1	3	52	0.252861	-0.244629
1	3	53	-0.0208848	-0.186082
1	3	54	0.982317	0.300704
1	3	55	-0.811068	-0.447865
1	3	56	-0.759223	-0.265835
1	3	57	-0.0745944	-0.350238
1	3	58	-0.0812272	-0.232455
1	3	59	-0.698144	-0.0854364
1	3	60	0.73475	0.616566
1	3	61	-0.233848	-0.21392
1	3	62	1.0549	0.1398
1	3	63	0.436679	0.288061
1	3	64	0.676323	0.401717
1	3	65	0.162087	-0.0389623
1	3	66	0.680414	0.0326279
1	3	67	0.390224	-0.244778
1	3	68	0.851024	0.231584
1	3	69	-0.38877	-0.556147
1	3	70	-0.810785	-0.426987
1	3	71	1.12517	0.634372
1	3	72	0.111437	0.505488
1	3	73	0.0660258	0.383038
1	3	74	-0.115817	0.43365
1	3	75	0.2665	0.845858
1	3	76	0.671716	0.28322
1	3	77	0.78038	0.573303
1	3	78	0.493428	0.779281
1	3	79	0.83574	0.90739
1	3	80	-0.554989	0.136438
1	3	81	0.748167	0.806496
1	3	82	0.910117	1.28117
1	3	83	0.76117	0.831682
1	3	84	-0.0209592	1.09786
1	3	85	-0.0484208	0.6022
1	3	86	-0.0522465	0.625999
1	3	87	0.761385	1.23494
1	3	88	-0.0538371	0.280966
1	3	89	0.783037	0.955948
1	3	90	0.61752	0.371506
1	3	91	-0.133822	0.161874
1	3	92	0.119635	0.350049
1	3	93	1.14912	0.921543
1	3	94	0.715316	0.517826
1	3	95	0.685735	0.649956
1	3	96	0.306147	0.289174
1	3	97	0.437309	0.473189
1	3	98	0.514091	0.629127
1	3	99	0.286739	0.835327
1	3	100	0.770766	1.06437
1	3	101	0.0213801	0.128602
1	3	102	-0.989087	-0.0823372
1	3	103	NaN	NaN
1	3	104	-0.270937	0.17494
1	3	105	-0.829723	-0.219556
1	3	106	-0.329016	0.12978
1	3	107	-0.713701	-0.203539
1	3	108	-0.525425	-0.337068
1	4	1	0.0579766	0.188152
1	4	2	-0.207634	-0.0492148
1	4	3	-0.0614033	-0.135903
1	4	4	-0.352676	-0.236108
1	4	5	0.0297479	-0.0124109
1	4	6	0.218969	0.173519
1	4	7	0.0849072	-0.0848259
1	4	8	0.0116865	0.0923197
1	4	9	-0.0773448	-0.217358
1	4	10	0.325761	0.241004
1	4	11	-0.049397	-0.0186389
1	4	12	-0.0742699	-0.144882
1	4	13	-0.036115	-0.277963
1	4	14	-0.437486	-0.562909
1	4	15	-0.608732	-0.585907
1	4	16	-0.36341	-0.450953
1	4	17	-0.520665	-0.646929
1	4	18	-0.522267	-0.729957
1	4	19	-0.297645	-0.549566
1	4	20	-0.624815	-0.47208
1	4	21	-0.822627	-1.02066
1	4	22	-1.02488	-1.16073
1	4	23	-1.05425	-1.94049
1	4	24	-1.63118	-2.18181
1	4	25	-0.826941	-1.03925
1	4	26	-1.15266	-1.78844
1	4	27	0.0988743	-1.05252
1	4	28	-0.287502	-1.92684
1	4	29	-0.94761	-1.87986
1	4	30	-1.12307	-1.52533
1	4	31	-0.739496	-1.68027
1	4	32	-1.21443	-1.54052
1	4	33	-0.925991	-1.86662
1	4	34	-0.787234	-1.51258
1	4	35	-0.975208	-1.72842
1	4	36	-0.307319	-1.03046
1	4	37	-0.567718	-1.38684
1	4	38	-0.556597	-1.49633
1	4	39	-1.26281	-1.26352
1	4	40	-0.966794	-1.35079
1	4	41	0.344273	-1.07917
1	4	42	-0.226337	-1.09884
1	4	43	-0.501642	-0.873774
1	4	44	-0.0417506	-0.63624
1	4	45	-0.321395	-0.963141
1	4	46	-0.219079	-0.547306
1	4	47	0.158215	-0.207572
1	4	48	-0.101219	-0.0341771
1	4	49	0.285283	-0.104283
1	4	50	-0.342614	-0.322436
1	4	51	0.232545	0.0465677
1	4	52	0.824298	0.391609
1	4	53	0.0331022	0.0445599
1	4	54	-0.117787	-0.393291
1	4	55	-0.236389	-0.646012
1	4	56	-0.607154	-0.524087
1	4	57	0.0934164	0.0682595
1	4	58	0.172653	0.00336074
1	4	59	-0.299604	0.124254
1	4	60	0.195984	0.412024
1	4	61	0.561142	0.376975
1	4	62	0.0919789	0.177923
1	4	63	0.00988898	-0.0683996
1	4	64	0.213188	-0.213826
1	4	65	0.39892	-0.0204152
1	4	66	1.02205	0.442197
1	4	67	1.20474	0.661279
1	4	68	3.25907	2.33096
1	4	69	1.04378	0.777541
1	4	70	1.22723	0.677676
1	4	71	0.81243	1.08506
1	4	72	1.74354	0.795935
1	4	73	0.534089	0.629307
1	4	74	0.981157	0.271477
1	4	75	2.00459	1.02807
1	4	76	1.6738	1.14695
1	4	77	2.40148	1.49849
1	4	78	2.29945	1.69004
1	4	79	1.7747	1.68899
1	4	80	2.12061	1.62393
1	4	81	1.95272	1.42592
1	4	82	1.89942	1.5992
1	4	83	1.67172	1.47499
1	4	84	2.33309	1.93579
1	4	85	1.52091	1.6758
1	4	86	1.77059	1.66194
1	4	87	0.869655	1.31169
1	4	88	0.408782	1.00446
1	4	89	1.36395	1.71858
1	4	90	1.64844	1.53755
1	4	91	1.43302	1.52406
1	4	92	1.06487	1.49573
1	4	93	1.45592	1.45831
1	4	94	1.79821	1.39917
1	4	95	1.49195	1.58472
1	4	96	1.36747	1.13552
1	4	97	0.258058	0.798162
1	4	98	0.413433	0.918939
1	4	99	0.649899	0.832196
1	4	100	0.00900066	0.565643
1	4	101	0.243053	0.516644
1	4	102	0.601877	0.768567
1	4	103	0.510874	0.315079
1	4	104	-0.129765	-0.187304
1	4	105	0.0543749	0.269372
1	4	106	-0.212602	-0.0154613
1	4	107	-0.0316756	0.0690796
1	4	108	0.524759	0.410446
1	5	1	-0.982219	-0.714173
1	5	2	1.76703	0.0437128
1	5	3	0.694347	0.344339
1	5	4	0.371178	0.21255
1	5	5	-0.34149	0.0116223
1	5	6	-1.00801	-0.217622
1	5	7	0.620139	0.316866
1	5	8	-0.327933	0.288917
1	5	9	0.276732	0.0397922
1	5	10	-0.791528	-0.609399
1	5	11	-0.986418	-0.246486
1	5	12	-0.959313	-0.664338
1	5	13	-1.10035	-0.486519
1	5	14	-0.273983	0.109198
1	5	15	1.24567	0.466547
1	5	16	-1.72966	-1.67338
1	5	17	-1.23068	-0.996432
1	5	18	-0.678478	-1.00668
1	5	19	0.0116268	-0.276541
1	5	20	-0.669464	-0.652294
1	5	21	-1.01428	-0.841133
1	5	22	0.389186	-0.026521
1	5	23	-1.69733	-1.91744
1	5	24	-0.671607	-0.897435
1	5	25	-1.59584	-1.90763
1	5	26	1.24097	-0.646145
1	5	27	-1.90215	-1.19384
1	5	28	-2.42723	-2.13884
1	5	29	-1.6948	-2.21227
1	5	30	-2.18042	-1.20345
1	5	31	-2.46526	-1.80192
1	5	32	-2.97406	-2.38024
1	5	33	-1.52238	-1.13787
1	5	34	-1.78746	-0.365324
1	5	35	-2.65487	-1.74403
1	5	36	-2.02926	-1.65427
1	5	37	-2.65155	-3.09605
1	5	38	-1.58294	-2.47043
1	5	39	-0.903494	-1.19282
1	5	40	-0.634978	-0.629709
1	5	41	-0.51236	-0.949953
1	5	42	-0.320015	-0.746793
1	5	43	-1.75831	-1.14157
1	5	44	-0.563945	-0.30723
1	5	45	-0.0952103	-0.772958
1	5	46	-0.629366	-0.891427
1	5	47	-1.19477	-0.896452
1	5	48	0.0197034	-0.538768
1	5	49	-0.174456	-0.256603
1	5	50	2.12486	0.997314
1	5	51	0.124178	0.606428
1	5	52	0.589143	-0.170195
1	5	53	-0.0863742	-0.220828
1	5	54	1.58373	0.801059
1	5	55	-1.12886	-0.44655
1	5	56	0.294128	-0.126004
1	5	57	0.148396	0.172926
1	5	58	0.32566	0.0799376
1	5	59	0.026151	-0.0981164
1	5	60	-0.770123	-0.516255
1	5	61	0.730477	0.576533
1	5	62	0.289126	0.286039
1	5	63	-0.13227	-0.0567171
1	5	64	0.2535	0.225247
1	5	65	-0.180033	-0.276151
1	5	66	0.381142	0.375182
1	5	67	1.38451	1.28018
1	5	68	-0.340252	-0.361461
1	5	69	-0.145557	0.127692
1	5	70	-0.413377	-0.172623
1	5	71	0.143285	0.418098
1	5	72	0.802694	0.758991
1	5	73	0.239351	0.472639
1	5	74	-0.105554	0.122521
1	5	75	1.15445	1.01289
1	5	76	0.992986	0.783665
1	5	77	2.06839	-0.0211497
1	5	78	0.610258	0.458549
1	5	79	0.00845302	0.592725
1	5	80	-2.22508	-0.784647
1	5	81	0.485314	0.669845
1	5	82	-0.111117	0.239566
1	5	83	0.163036	0.762702
1	5	84	0.260056	0.668437
1	5	85	-0.218103	0.39491
1	5	86	0.345372	0.767422
1	5	87	0.428269	0.845575
1	5	88	-0.672627	0.181037
1	5	89	0.880011	1.21779
1	5	90	-0.919677	-0.026068
1	5	91	1.61897	0.914267
1	5	92	0.427513	0.337028
1	5	93	-0.0836482	0.316488
1	5	94	0.106882	0.528199
1	5	95	-0.666798	0.499095
1	5	96	-0.346132	0.427563
1	5	97	-0.312152	0.605974
1	5	98	0.00485315	0.224986
1	5	99	0.998007	1.15865
1	5	100	0.724547	0.262681
1	5	101	0.482312	0.646871
1	5	102	-1.51479	-1.05406
1	5	103	0.566083	0.34058
1	5	104	1.3351	0.424342
1	5	105	1.01132	0.659043
1	5	106	0.407179	-0.245523
1	5	107	1.97421	0.376486
1	5	108	1.65178	0.92558
1	6	1	0.740544	0.901205
1	6	2	-0.670385	-0.578218
1	6	3	-0.84128	-0.873966
1	6	4	1.33423	0.829898
1	6	5	-0.68552	-0.398796
1	6	6	-0.267496	0.587639
1	6	7	0.100262	0.0351265
1	6	8	-0.642457	-0.921365
1	6	9	0.393756	0.269023
1	6	10	0.740257	0.00914365
1	6	11	-0.556818	-0.348353
1	6	12	-0.57767	-0.0585966
1	6	13	0.179525	-0.38952
1	6	14	1.57126	-0.310173
1	6	15	0.711495	-0.33104
1	6	16	NaN	NaN
1	6	17	-0.0612429	0.0199028
1	6	18	-0.956312	-1.03458
1	6	19	1.04166	-0.0591971
1	6	20	-1.90313	-1.22903
1	6	21	-1.46277	-1.02517
1	6	22	-0.714216	-0.0713143
1	6	23	-0.107762	-0.133028
1	6	24	-0.931322	-0.58831
1	6	25	2.1199	0.121099
1	6	26	-0.744129	-0.872373
1	6	27	-0.519672	-0.0835525
1	6	28	NaN	NaN
1	6	29	-0.627096	-0.43984
1	6	30	-0.977489	-0.883151
1	6	31	-1.45339	-1.0107
1	6	32	0.889362	-0.523057
1	6	33	0.895417	-0.131445
1	6	34	-0.616959	-0.674948
1	6	35	-1.49701	-1.24172
1	6	36	-1.17235	-1.26214
1	6	37	-0.746085	-0.903689
1	6	38	-1.43143	-1.59371
1	6	39	1.41235	-0.528774
1	6	40	0.460663	-1.21007
1	6	41	-0.806501	-0.69483
1	6	42	0.635451	-0.806687
1	6	43	-0.978748	-0.983776
1	6	44	-0.441741	-0.501505
1	6	45	0.309709	-0.12727
1	6	46	-0.0256851	0.0949111
1	6	47	-1.09889	-0.837699
1	6	48	-1.00659	-0.783805
1	6	49	-1.72733	-1.521
1	6	50	-0.732297	-0.263639
1	6	51	-0.372196	-0.265434
1	6	52	-0.73596	-0.433364
1	6	53	-0.105653	0.171842
1	6	54	-1.36635	-1.54694
1	6	55	-0.588712	-0.913049
1	6	56	0.374969	-0.0676068
1	6	57	-0.1915	-0.294925
1	6	58	0.630412	0.849123
1	6	59	0.928018	0.354077
1	6	60	-0.946002	-0.50537
1	6	61	0.558312	0.348397
1	6	62	-0.17645	-0.170463
1	6	63	-0.768298	-0.0317823
1	6	64	0.18215	-0.144378
1	6	65	-1.22218	0.258792
1	6	66	0.505736	0.321271
1	6	67	-0.956133	0.0695467
1	6	68	-0.884599	-0.233469
1	6	69	1.48748	1.32648
1	6	70	-0.829178	-0.32236
1	6	71	-0.49062	1.05961
1	6	72	0.436198	0.872082
1	6	73	0.906719	0.225716
1	6	74	-0.414725	0.186364
1	6	75	0.653328	1.22396
1	6	76	-0.661892	0.444036
1	6	77	NaN	NaN
1	6	78	-0.348946	0.970896
1	6	79	0.444162	1.48476
1	6	80	-0.350528	0.212379
1	6	81	0.726839	1.03732
1	6	82	1.85379	1.72774
1	6	83	1.38511	1.52262
1	6	84	0.218627	0.613029
1	6	85	0.00303126	0.617738
1	6	86	-0.723586	0.47562
1	6	87	-0.754832	0.231568
1	6	88	-0.0978702	1.28941
1	6	89	-1.13448	0.110051
1	6	90	-0.601159	0.316218
1	6	91	0.472199	1.05728
1	6	92	-0.426096	0.535849
1	6	93	-0.187443	1.55846
1	6	94	-2.10803	-1.36409
1	6	95	0.455223	1.08374
1	6	96	0.571879	1.5641
1	6	97	-1.38016	-0.482678
1	6	98	-1.2489	-0.299702
1	6	99	-0.238283	0.499511
1	6	100	-0.427404	0.489206
1	6	101	-1.09809	0.421396
1	6	102	1.98282	2.94702
1	6	103	-2.16171	-0.884571
1	6	104	-0.770775	0.15268
1	6	105	-1.49526	-0.724994
1	6	106	-0.401455	0.432391
1	6	107	-0.232555	0.0595301
1	6	108	-0.496891	0.588828
1	7	1	-0.961355	0.118126
1	7	2	-0.250567	-0.618935
1	7	3	0.65454	-0.0512484
1	7	4	0.485484	0.187205
1	7	5	0.422514	0.0118977
1	7	6	-0.269557	0.264898
1	7	7	0.0976265	0.235018
1	7	8	0.183078	-0.062428
1	7	9	-0.74512	0.056146
1	7	10	0.407489	-0.200658
1	7	11	0.370075	0.0770535
1	7	12	-1.1121	-0.300247
1	7	13	-0.583229	-0.197795
1	7	14	-1.39154	-0.36008
1	7	15	-0.86395	-0.6488
1	7	16	-0.977042	-0.638729
1	7	17	-2.58662	-1.44189
1	7	18	-0.616588	-0.78801
1	7	19	-1.75298	-0.790793
1	7	20	-1.64096	-1.14893
1	7	21	-1.76274	-1.23743
1	7	22	-0.562217	-1.019
1	7	23	-0.202902	-1.25275
1	7	24	-1.03394	-1.72988
1	7	25	-1.85498	-1.23372
1	7	26	-0.554764	-1.46942
1	7	27	-0.792293	-1.12712
1	7	28	0.106361	-1.29095
1	7	29	-3.07135	-1.81603
1	7	30	-0.686436	-1.60596
1	7	31	-0.827134	-1.39387
1	7	32	-0.632584	-0.483551
1	7	33	1.19068	-0.455291
1	7	34	-1.40969	-2.05767
1	7	35	-2.58946	-1.8735
1	7	36	-1.68585	-2.52633
1	7	37	-2.25438	-1.35141
1	7	38	-0.882038	-1.53895
1	7	39	-0.676206	-1.09133
1	7	40	-2.20649	-1.48847
1	7	41	0.836388	-0.744055
1	7	42	-3.24066	-3.1324
1	7	43	-2.04185	-2.26996
1	7	44	-1.42869	-2.17059
1	7	45	-1.97897	-1.84061
1	7	46	-0.409257	-0.903079
1	7	47	-1.37484	-0.709464
1	7	48	0.626356	-0.512963
1	7	49	-0.345543	-0.601424
1	7	50	-1.1597	-0.638908
1	7	51	-0.401513	-0.573405
1	7	52	-3.30546	-1.70469
1	7	53	-1.45816	-1.30271
1	7	54	-2.29823	-2.06422
1	7	55	-0.43797	-0.323537
1	7	56	-0.307042	-0.200129
1	7	57	-0.822936	-0.704689
1	7	58	-0.234288	0.0105054
1	7	59	0.12762	0.111996
1	7	60	-0.072156	-0.204389
1	7	61	0.363155	0.207776
1	7	62	0.841236	0.406904
1	7	63	0.684283	0.332188
1	7	64	0.0641335	0.0192462
1	7	65	1.09935	0.154764
1	7	66	0.697477	0.654996
1	7	67	1.28475	0.237782
1	7	68	0.347617	-0.217979
1	7	69	0.46985	0.123089
1	7	70	0.756321	0.301736
1	7	71	1.0619	0.830252
1	7	72	2.22177	0.981512
1	7	73	0.790839	0.698228
1	7	74	0.210773	0.152111
1	7	75	-0.914044	-0.55089
1	7	76	-0.136732	0.228866
1	7	77	-0.106951	-0.0355078
1	7	78	1.57181	0.99602
1	7	79	0.932067	0.908501
1	7	80	0.593065	0.11284
1	7	81	0.914835	0.82458
1	7	82	0.966518	0.690838
1	7	83	1.87387	0.515566
1	7	84	-0.174866	-0.214842
1	7	85	0.675696	0.673619
1	7	86	0.168695	0.480859
1	7	87	1.60732	0.825356
1	7	88	-0.387292	-0.0991297
1	7	89	-0.388327	-0.121736
1	7	90	0.299359	1.08088
1	7	91	-0.300811	-0.56111
1	7	92	0.845832	0.532259
1	7	93	0.378404	0.295823
1	7	94	0.945102	0.514489
1	7	95	0.367114	0.376109
1	7	96	1.504	1.53357
1	7	97	1.70016	0.301204
1	7	98	2.64332	1.24575
1	7	99	1.27543	0.382497
1	7	100	1.10976	-0.115369
1	7	101	0.496082	0.179306
1	7	102	2.24643	0.37577
1	7	103	0.592171	0.208398
1	7	104	1.64315	0.302714
1	7	105	-0.0324751	-0.359212
1	7	106	0.594624	-0.0101544
1	7	107	-0.639283	-0.0649499
1	7	108	0.782677	0.727016
1	8	1	0.54181	0.33628
1	8	2	-0.00842334	0.149337
1	8	3	0.585797	0.102945
1	8	4	0.0583517	-0.290603
1	8	5	0.00348847	-0.073981
1	8	6	-0.117858	0.0114087
1	8	7	-0.119912	-0.00213452
1	8	8	0.0568096	0.106382
1	8	9	-0.202256	-0.0794772
1	8	10	-0.744178	-0.565301
1	8	11	0.600907	-0.0147869
1	8	12	0.503216	0.0572164
1	8	13	0.0173371	0.0638534
1	8	14	-0.310761	-0.555612
1	8	15	-0.431889	-0.502554
1	8	16	-1.00495	-0.799686
1	8	17	-0.493256	-0.456758
1	8	18	-0.13435	-0.577827
1	8	19	-0.934691	-1.04703
1	8	20	0.0492008	-0.991326
1	8	21	-0.416961	-0.976101
1	8	22	-1.19913	-1.1866
1	8	23	-0.299862	-1.12844
1	8	24	-1.55351	-1.7561
1	8	25	-0.925916	-1.10305
1	8	26	0.241563	-1.03511
1	8	27	-0.646844	-1.80468
1	8	28	-0.319088	-1.1128
1	8	29	-1.84886	-2.53072
1	8	30	-1.95781	-1.83294
1	8	31	-1.78158	-2.1099
1	8	32	-0.795655	-1.4039
1	8	33	-1.75465	-1.85296
1	8	34	-0.712005	-1.26979
1	8	35	-0.862116	-1.4058
1	8	36	-1.24244	-1.97527
1	8	37	-0.989625	-1.46088
1	8	38	-1.10498	-1.14667
1	8	39	-1.09185	-1.14638
1	8	40	-0.084173	-1.04215
1	8	41	1.31252	-0.142211
1	8	42	-1.57024	-1.69413
1	8	43	-0.617191	-0.432442
1	8	44	-0.749716	-0.822314
1	8	45	-0.782111	-0.884373
1	8	46	0.0992284	-0.489925
1	8	47	0.0400876	-0.208038
1	8	48	-0.00441133	-0.315829
1	8	49	0.305017	-0.00794201
1	8	50	0.402288	0.0645534
1	8	51	-0.18666	-0.359981
1	8	52	0.471146	0.0313641
1	8	53	0.467772	0.157437
1	8	54	0.110418	0.109779
1	8	55	-0.616315	-0.496333
1	8	56	-0.0797191	0.0575152
1	8	57	-0.160059	-0.0218035
1	8	58	0.190744	0.171427
1	8	59	0.0238676	-0.108693
1	8	60	0.0760319	-0.030309
1	8	61	0.565514	0.348056
1	8	62	0.0526634	0.142813
1	8	63	-0.110079	-0.160898
1	8	64	0.0883235	0.0315832
1	8	65	0.919611	0.101542
1	8	66	0.209524	0.407778
1	8	67	0.76212	0.341648
1	8	68	-0.00573111	-0.34394
1	8	69	2.01463	1.18418
1	8	70	0.58612	0.623247
1	8	71	-0.11989	-0.00476762
1	8	72	0.0585621	0.343778
1	8	73	0.0889419	0.244
1	8	74	-0.411312	0.131402
1	8	75	0.187785	0.551115
1	8	76	-0.846337	-0.243935
1	8	77	-0.537373	-0.114082
1	8	78	0.0451736	0.0932542
1	8	79	-0.368658	0.0966645
1	8	80	0.168187	0.217194
1	8	81	-0.151281	0.444997
1	8	82	-1.07561	-0.385978
1	8	83	0.811452	1.01533
1	8	84	0.960371	1.31694
1	8	85	1.2187	1.47732
1	8	86	0.379332	0.208999
1	8	87	-0.228249	0.567727
1	8	88	0.724729	1.19648
1	8	89	0.87593	0.833736
1	8	90	0.975718	0.863215
1	8	91	-0.312654	0.110739
1	8	92	-0.238532	0.302275
1	8	93	-0.430484	0.213602
1	8	94	-0.958494	-0.116601
1	8	95	0.51642	0.615587
1	8	96	0.626982	0.488055
1	8	97	1.09781	0.56551
1	8	98	-0.176827	0.152995
1	8	99	1.55195	0.82719
1	8	100	1.39767	1.14756
1	8	101	0.431356	0.775575
1	8	102	-0.249204	-0.227526
1	8	103	-0.152422	-0.0353213
1	8	104	0.565316	0.116943
1	8	105	0.755739	0.333158
1	8	106	-0.372683	-0.276441
1	8	107	-0.141194	-0.0231544
1	8	108	0.0666704	0.0238492
1	9	1	-0.389473	0.305262
1	9	2	0.0710386	0.0575224
1	9	3	-0.731747	0.147069
1	9	4	0.496953	0.0629188
1	9	5	-0.0315996	-0.365834
1	9	6	0.512727	0.0448536
1	9	7	-0.0167455	0.414633
1	9	8	-0.395975	-0.148408
1	9	9	0.243742	-0.0540479
1	9	10	0.415791	-0.337279
1	9	11	-0.167854	0.0421894
1	9	12	1.04992	0.306835
1	9	13	0.684742	0.185633
1	9	14	0.0977779	-0.169059
1	9	15	1.15596	0.0886561
1	9	16	NaN	NaN
1	9	17	0.13373	-0.536553
1	9	18	-0.0576109	-0.484782
1	9	19	0.791503	-0.238806
1	9	20	-0.791521	-0.567617
1	9	21	0.326671	-1.02179
1	9	22	0.187028	-0.831022
1	9	23	-0.191702	-1.62342
1	9	24	-0.216926	-1.18902
1	9	25	-1.39411	-1.55534
1	9	26	-1.15035	-1.27585
1	9	27	-1.03863	-2.27058
1	9	28	-0.667881	-1.07107
1	9	29	-0.760115	-0.9223
1	9	30	-0.476828	-1.24408
1	9	31	-0.121146	-1.54141
1	9	32	-1.04189	-1.45273
1	9	33	-0.48752	-2.6115
1	9	34	-0.0608381	-1.41165
1	9	35	-0.185923	-1.45376
1	9	36	-0.490558	-1.11227
1	9	37	-1.60542	-2.33518
1	9	38	-0.960442	-1.87546
1	9	39	-0.00572643	-1.66667
1	9	40	-0.184196	-1.05108
1	9	41	-1.0183	-1.27409
1	9	42	-0.0141848	-1.47003
1	9	43	-0.581096	-0.832868
1	9	44	0.27554	-0.262915
1	9	45	0.362708	-0.561069
1	9	46	0.663985	-0.247347
1	9	47	-0.374798	-0.723552
1	9	48	0.186522	-0.583198
1	9	49	-0.235686	-0.785483
1	9	50	0.0970807	-0.115554
1	9	51	-0.19363	-0.115652
1	9	52	-0.23688	-0.229087
1	9	53	-0.213831	-0.284787
1	9	54	-0.393178	-0.537089
1	9	55	0.163581	0.122657
[truncated: 2,105 more rows]
